# Supplementary material for: Tuberous sclerosis complex inactivation disrupts melanogenesis via mTORC1 activation
Source: JCI journal article supplement (doi:10.1172/jci84262), 2016-12-04
Supplement: sd1 [file 1]

## **Supplemental Information**

### **The TSC Protein Complex Regulates Melanogenesis through AKT-GSK3 $\beta$ - $\beta$ -catenin-MITF signaling**

**Juxiang Cao, Magdalena E. Tyburczy, Joel Moss, Thomas N. Darling, Hans R. Widlund and David J. Kwiatkowski\***

#### **SUPPLEMENTAL SECTION INVENTORY**

**Figure S1 relates to manuscript Figure 1.**

**Figure S2 relates to manuscript Figure 2.**

**Figure S3 relates to manuscript Figure 3.**

**Figure S4 relates to manuscript Figure 4.**

**Figure S5 relates to manuscript Figures 5 and 6.**

**Figure S6 relates to manuscript Figures 7 and 8.**

**Fig. S1 related to Figure 1**

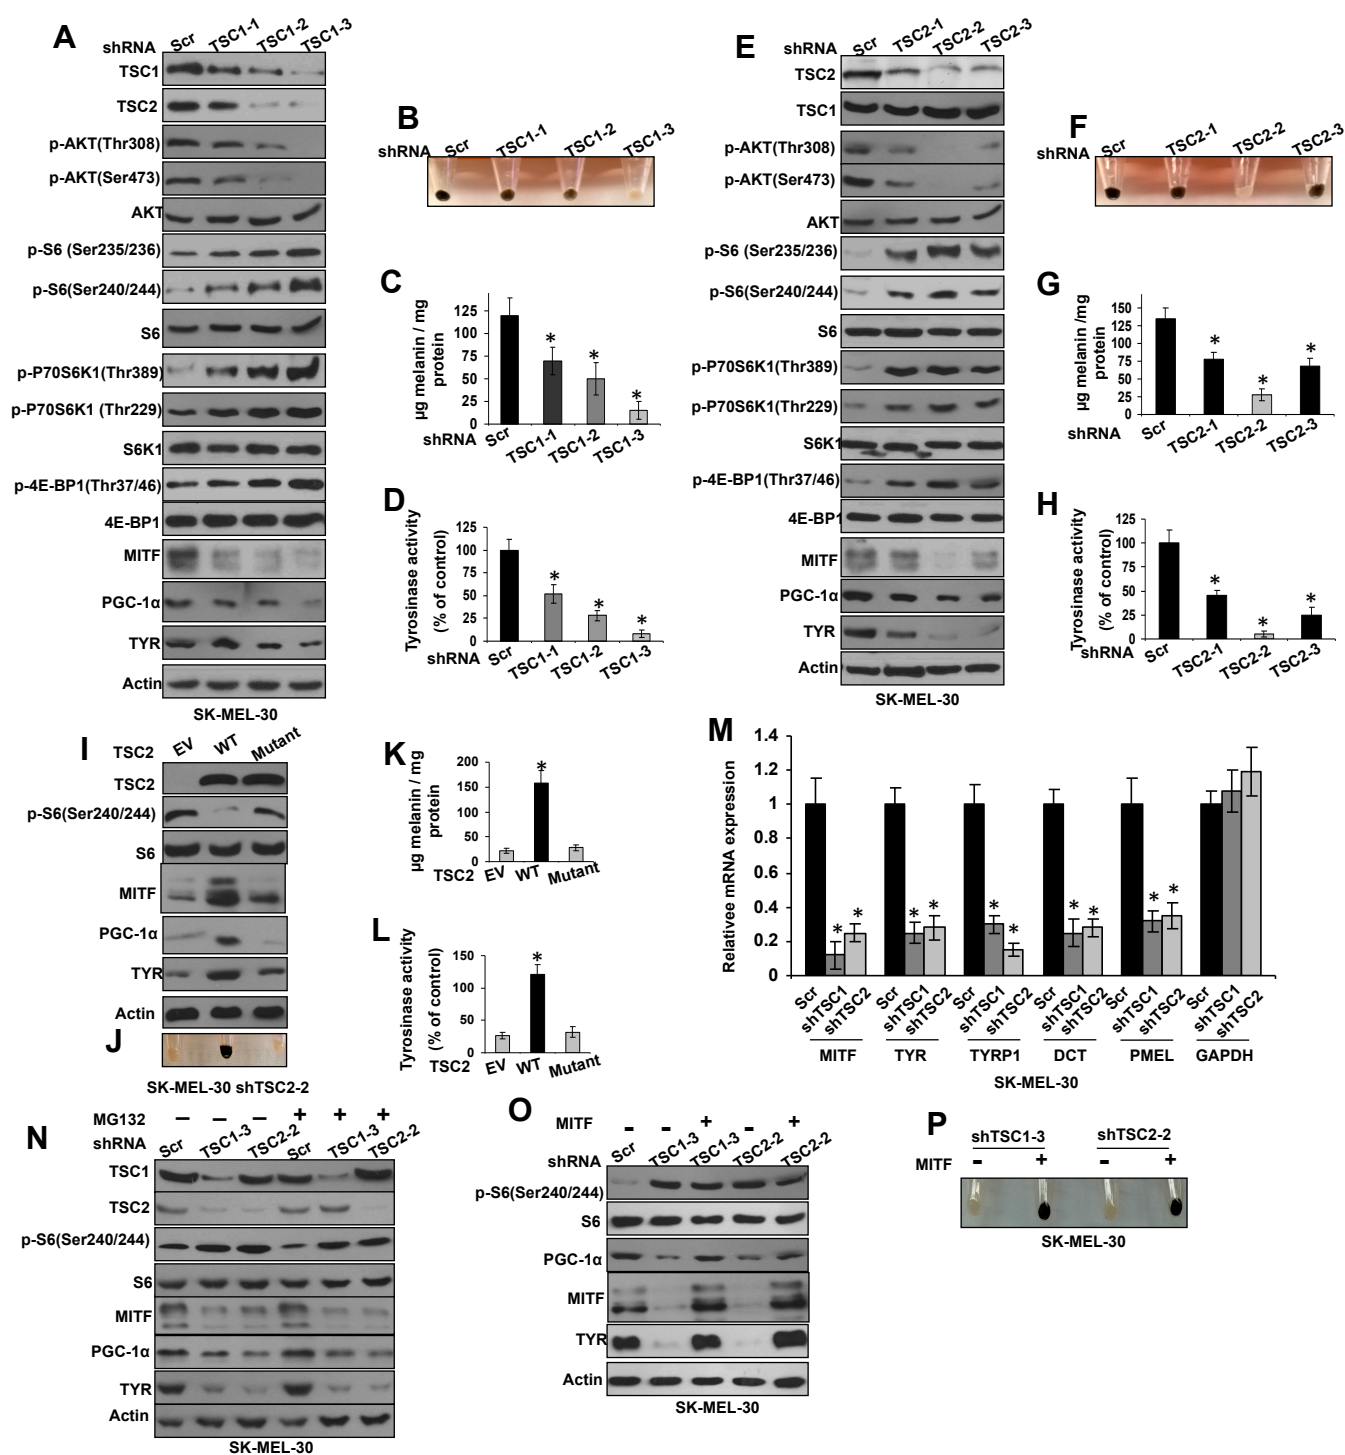

**Figure S1. Disruption of the TSC Protein Complex Induces the Loss of Pigmentation in Melanocytes.**

- (A-D)** Highly pigmented human melanoma cells (SK-MEL-30) were infected with lentiviruses expressing independent TSC1 shRNAs or independent TSC2 shRNAs or control (Scr) shRNA, and selected with puromycin. **(A)** Immunoblot analysis shows that TSC1 depletion leads to reduced MITF-M and its downstream targets PGC-1 $\alpha$  and TYR, as well as mTORC1 activation. **(B)** Cell pellets from TSC1 depleted cells have reduced pigment. **(C)** TSC1 depleted cells have reduced melanin content. **(D)** TSC1 depleted cells have reduced tyrosinase activity. Data in **(C-D)** are presented as mean  $\pm$  S.D. from at least three independent experiments. \*,  $p < 0.05$ .
- (E-H)** Entirely similar to **A-D**, except that TSC2 shRNAs were expressed.
- (I-L)** TSC2 depleted SK-MEL-30 cells were reconstituted with lentiviruses containing wildtype TSC2 or patient derived TSC2 mutant (P419S) or empty vector control viruses (EV) and selected with puromycin. **(I)** Immunoblot analysis shows that wildtype TSC2 but not the TSC2 mutant rescues mTORC1 activation, MITF and PGC-1 $\alpha$  expression, and TYR protein levels. **(J)** pigmentation; **(K)** melanin content; **(L)** tyrosinase activity; are also all rescued by WT TSC2. Data in **(K-L)** are presented as mean  $\pm$  S.D. from at least three independent experiments. \*,  $p < 0.05$ .
- (M)** Q-PCR analysis of gene expression. Expression of the indicated genes was measured in control or shRNA expressing cells by quantitative RT-PCR. GAPDH was a control. Data are presented as mean  $\pm$  S.D. from at least three independent experiments. \*,  $p < 0.05$ .
- (N)** Immunoblot analysis of lysates from TSC1 or TSC2 depleted cells treated with MG132 (25  $\mu$ M) for 6 hours. MITF, PGC-1 $\alpha$ , and TYR were not rescued by MG132 treatment.
- (O-P)** TSC1 or TSC2 depleted cells were infected with lentiviruses containing MITF-M or empty vector control (EV) and selected with puromycin, **(O)** Immunoblot analysis shows increased MITF and TYR expression in cells infected with MITF-M lentivirus. **(P)** Ectopic expression of MITF rescues the pigmentation loss in TSC1 or TSC2 depleted cells.

**Fig. S2 related to Figure 2**

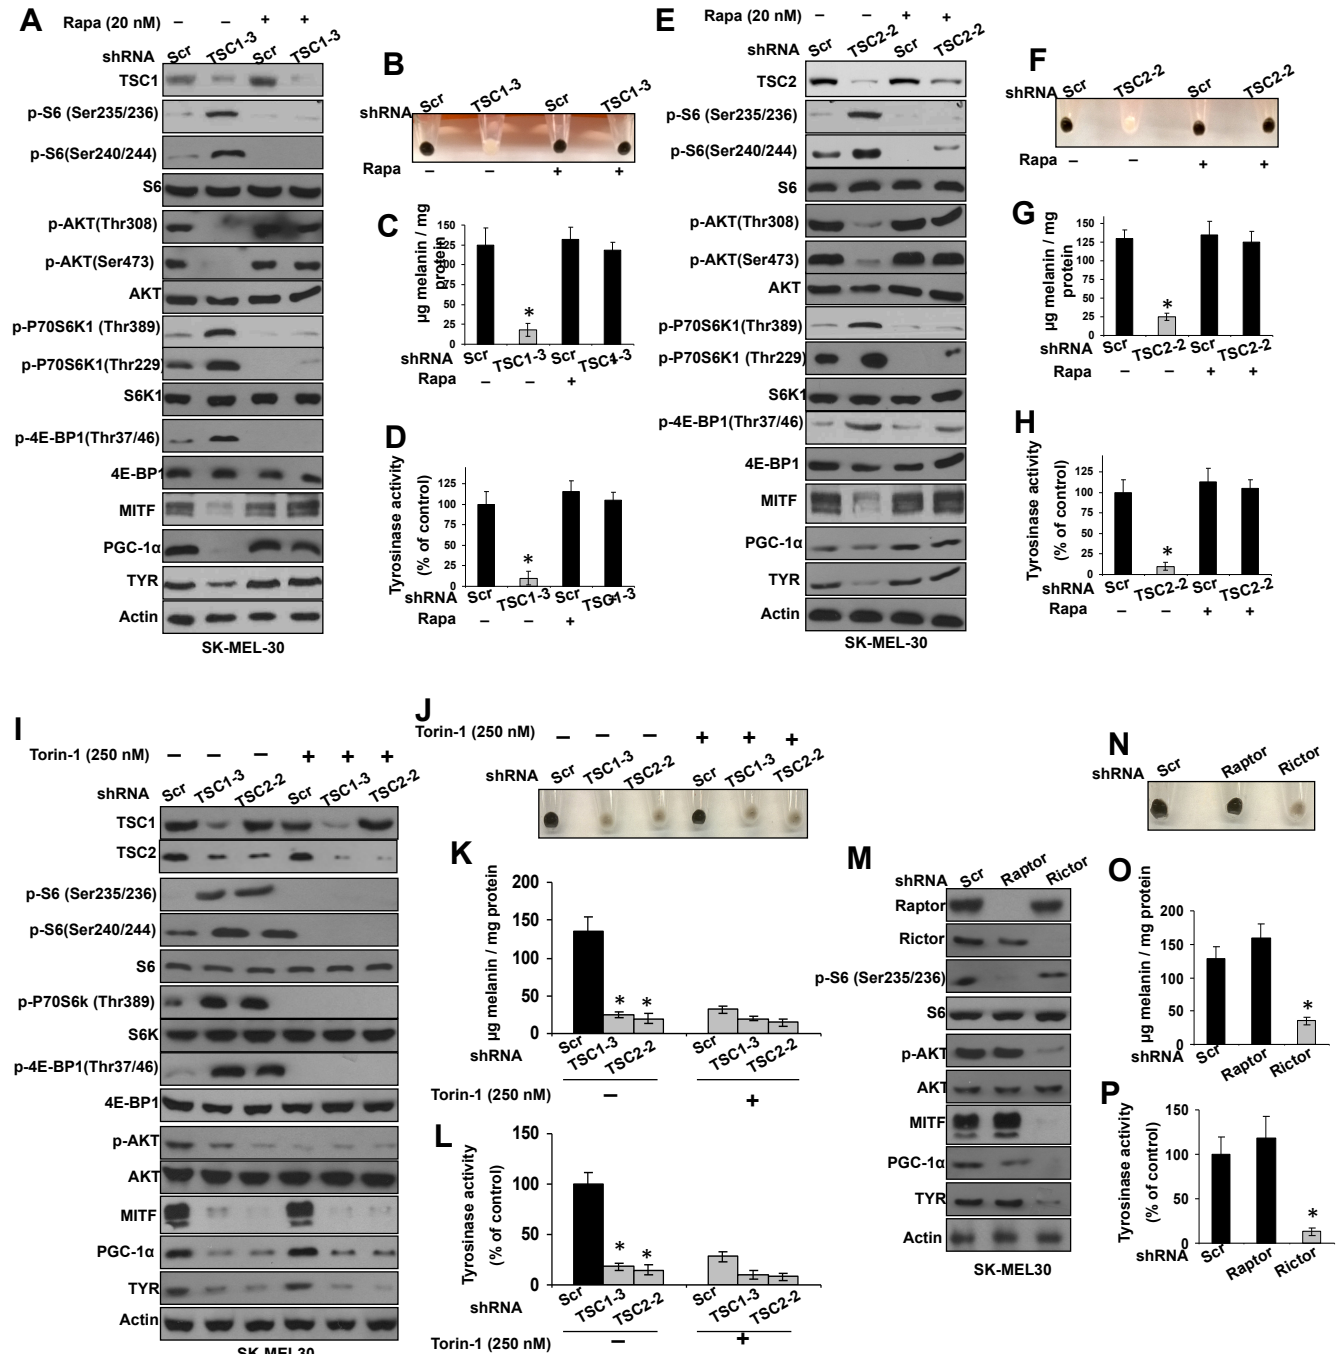



**Figure S2. Rapamycin but not Torin-1 Restores the Loss of Pigmentation in TSC1 Protein Complex Deficient Human Melanoma Cells**

**(A-D)** SK-MEL-30 cells stably expressing shTSC1 or control (Scr) were treated with rapamycin (20 nM) or vehicle control (DMSO) for 72 hours. **(A)** Immunoblot analysis shows recovery of MITF expression, suppression of mTORC1, and recovery of pAKT levels in cells treated with rapamycin. **(B)** pigmentation; **(C)** melanin content; **(D)** tyrosinase activity; are also all rescued by rapamycin. Data in **(C-D)** are presented as mean  $\pm$  S.D. from at least three independent experiments. \*,  $p < 0.05$ .

**(E-H)** Entirely similar to **A-D**, except with SK-MEL-30 cells with shTSC2 knockdown.

**(I-L)** SK-MEL-30 cells stably expressing shTSC1, shTSC2 or control (Scr) were treated with Torin1 (250 nM) or vehicle control (DMSO) for 72 hours. **(I)** Immunoblot analysis shows complete suppression of mTORC1 and mTORC2. **(J)** pigmentation; **(K)** melanin content; **(L)** tyrosinase activity; none are rescued by Torin1 treatment. Data in **(K-L)** are presented as mean  $\pm$  S.D. from at least three independent experiments. \*,  $p < 0.05$ .

**(M-P)** SK-MEL-30 cells were infected with control (Scr) or shRaptor or shRictor lentiviruses, and selected with puromycin for 6 days. **(M)** Immunoblot analysis shows that Rictor knockdown reduces MITF, PGC-1 $\alpha$ , and TYR expression. **(N)** pigmentation; **(O)** melanin content; **(P)** tyrosinase activity; all show reduced pigmentation in Rictor knockdown cells. Data in **(O-P)** are presented as mean  $\pm$  S.D. from at least three independent experiments. \*,  $p < 0.05$ .

Fig. S3 related to Figure 3

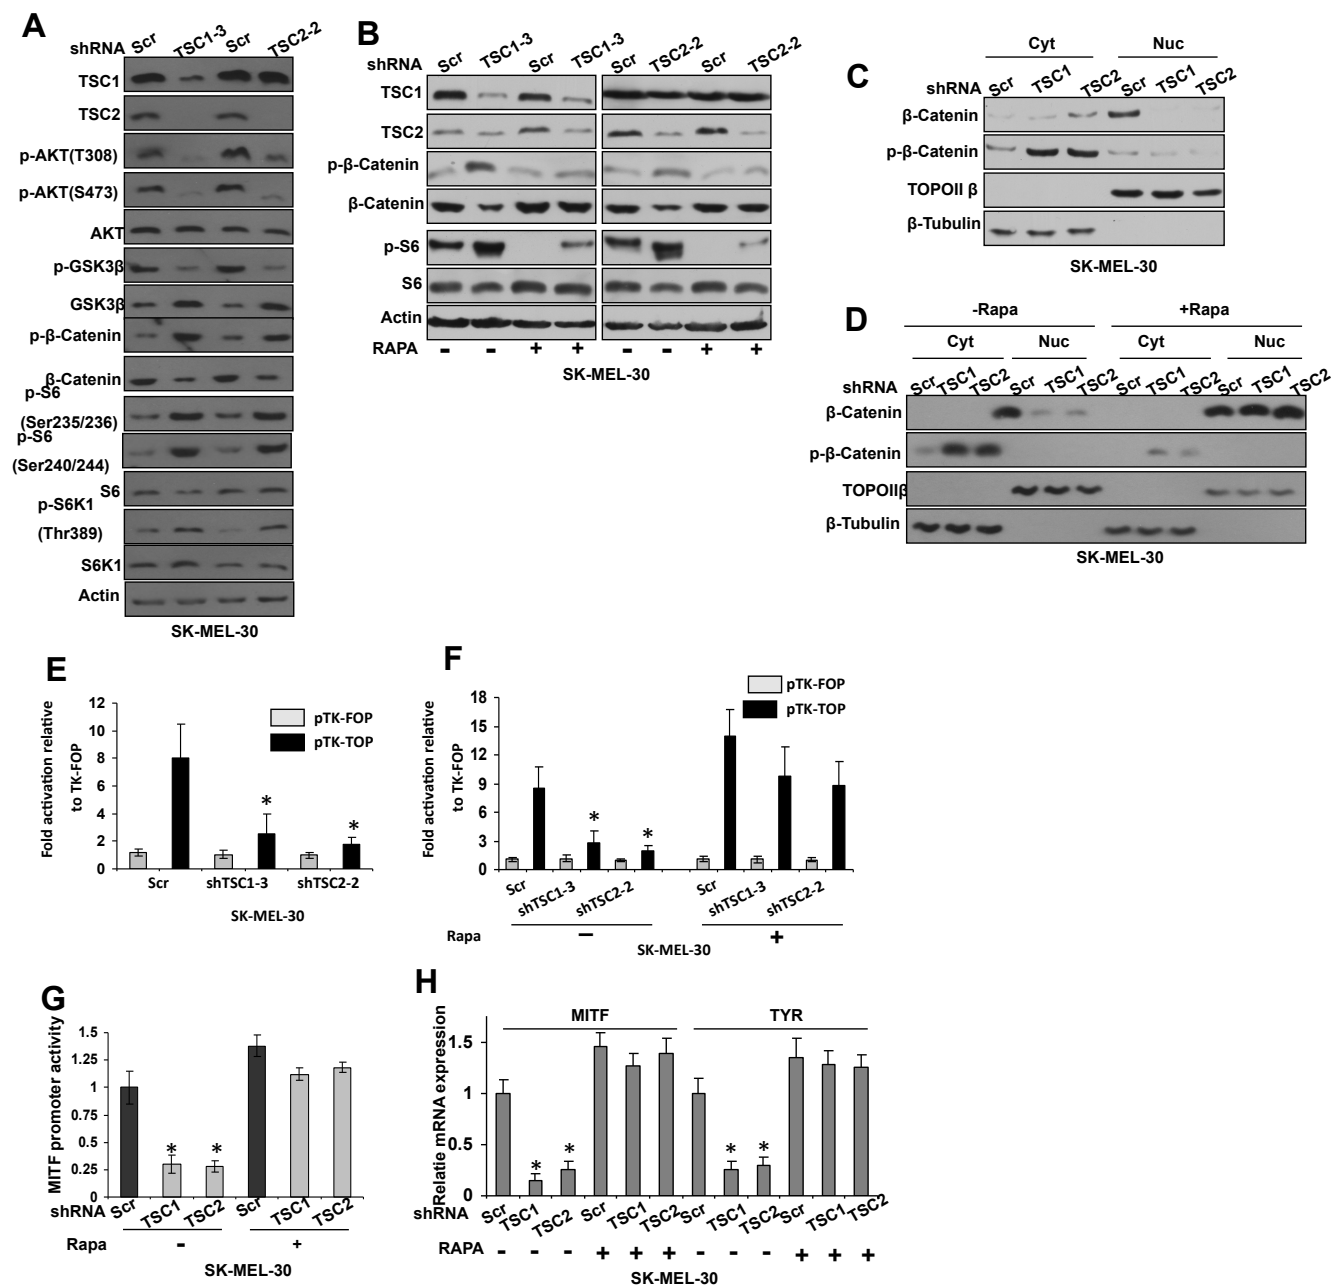

**Figure S3. Disruption of the TSC protein Complex Leads to GSK3 $\beta$  Activation and the Loss of  $\beta$ -catenin and MITF Transcription in Human Melanoma Cells.**

- (A) Immunoblot analysis of SK-MEL-30 cells expressing shTSC1 or shTSC2 or control (Scr) shows reduced p-AKT (Ser 473), reduced p-GSK3 $\beta$  (Ser9), increased GSK3 $\beta$ , reduced  $\beta$ -catenin and increased p- $\beta$ -catenin (Ser 33,37/Thr 41).
- (B) Immunoblot analysis of SK-MEL-30 cells expressing shTSC1 or shTSC2 or control (Scr), treated with rapamycin (20 nM) or vehicle (DMSO) for 72 hours shows recovery of  $\beta$ -catenin levels.
- (C) Immunoblot analysis of cytosolic (Cyt) and Nuclear (Nuc) fractions shows loss of nuclear  $\beta$ -catenin in the TSC1 and TSC2 knockdown cells. TOPOII  $\beta$  and  $\beta$ -Tubulin serve as controls for nucleus and cytosol respectively.
- (D) Entirely similar to (C), except that cells on right were treated with rapamycin for 4 days, and  $\beta$ -catenin is seen again in the nuclear fraction.
- (E) Graph of relative luciferase expression in SK-MEL-30 cells stably expressing shTSC1 or shTSC2 or control (Scr), transfected with TK-TOP or TK-FOP driven luciferase.
- (F) Entirely similar to (E), except that SK-MEL-30 cells were treated with rapamycin (20 nM) or vehicle (DMSO) for 72 hours prior to analysis.
- (G) Graph of MITF promoter activity of SK-MEL-30 cells with TSC1 or TSC2 knockdowns treated with or without 20 nM rapamycin, measured using pGL3-Luciferase empty vector or MITF-PGL3-luciferase.
- (H) Cells treated as in (G) were analyzed by quantitative RT-PCR for MITF-M and TYR mRNA levels.

Data in (E-H) are presented as mean  $\pm$  S.D. from at least three independent experiments. \*,  $p < 0.05$ .

**Fig. S4 related to Figure 4**

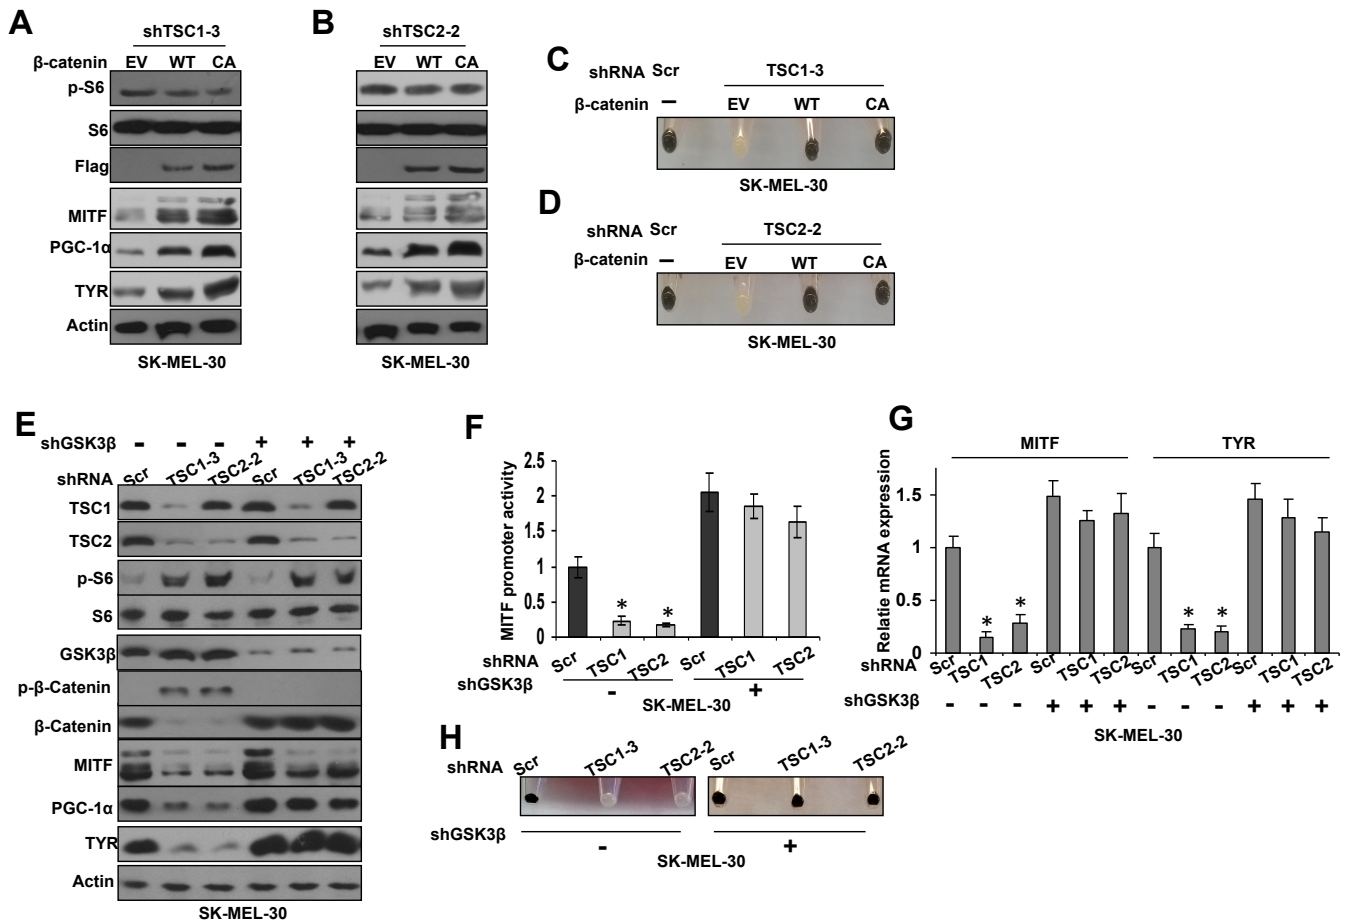

**Figure S4. Ecotopic Expression of  $\beta$ -catenin Restores Pigmentation in TSC Protein Complex Disrupted Human Melanoma Cells.**

**(A)** Immunoblot analysis of SK-MEL-30 cells stably expressing shTSC1 or shTSC2 transduced to express wild type (WT)  $\beta$ -catenin or constitutively active (CA)  $\beta$ -catenin (S33Y) or empty vector control (EV). Note MITF expression in the WT and CA  $\beta$ -catenin expressing SK-MEL-30.

**(B)** Entirely similar to **(A)**, except that SK-MEL-30 are expressing shTSC2.

**(C, D)** Pigmentation of cells from **(A and B)**, respectively.

**(E)** Immunoblot analysis of SK-MEL-30 cells stably expressing shTSC1 or shTSC2 transduced to express

GSK3 $\beta$  shRNA or control shRNA. Note marked enhancement of  $\beta$ -catenin expression in the GSK3 $\beta$  shRNA cells.

**(F)** Graph of luciferase assay, assessed on the cells in **(E)** after transfection with pGL3-Luciferase empty vector or MITF-PGL3-luciferase.

**(G)** Q-RT-PCR analysis of MITF and TYR mRNA levels of the cells described in **(E)** shows marked enhancement of MITF and TYR expression by GSK3 $\beta$  shRNA

**(H)** Pigmentation of cells from **(E)**.

Data in **(F-G)** are presented as mean  $\pm$  S.D. from at least three independent experiments.

\*,  $p < 0.05$ .

.

**Fig. S5 related to Figures 5 and 6**

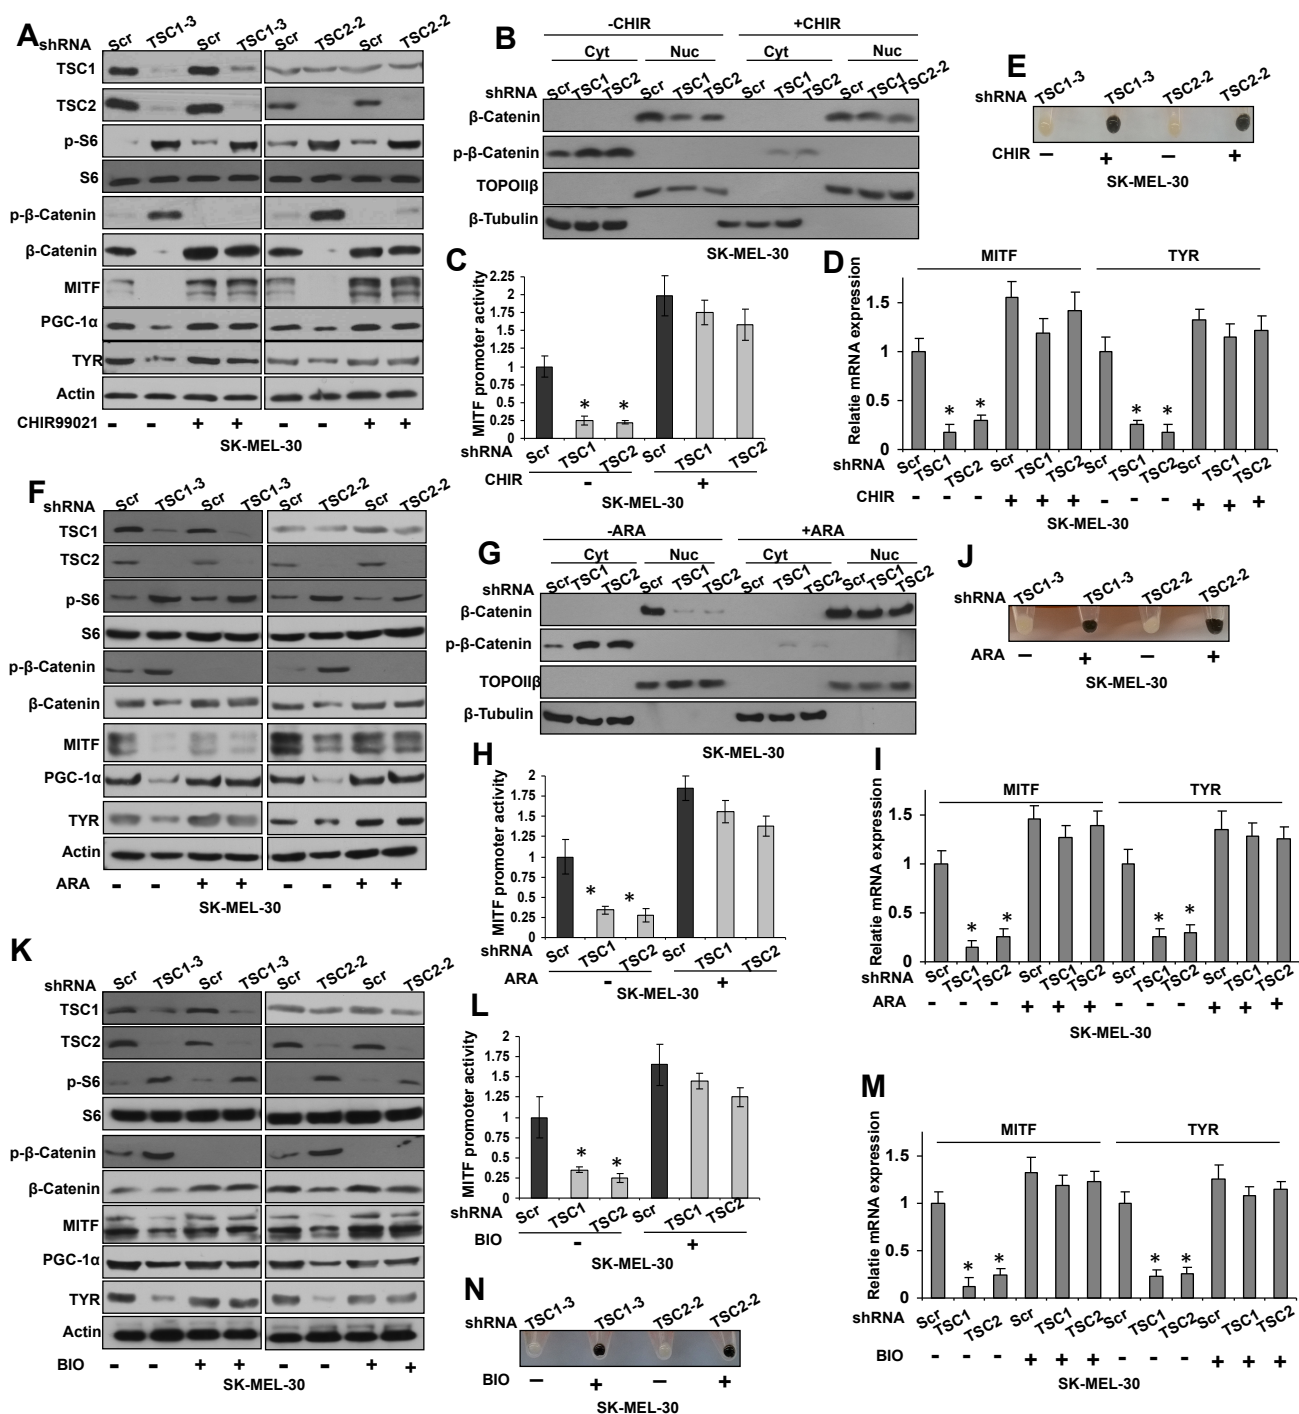

**Figure S5. TSC Protein Complex Regulates MITF Transcription and Pigmentation by Suppressing GSK3 $\beta$  in Human Melanoma Cells.**

- (A)** Immunoblot analysis of SK-MEL-30 cells expressing shTSC1 or shTSC2 or control (Scr) after treatment with the GSK3 $\beta$  specific inhibitor CHIR-99021 (3  $\mu$ M) for 5 days. Note recovery of  $\beta$ -catenin and MITF expression in cells treated with CHIR-99021.
- (B)** Immunoblot analysis shows recovery of nuclear  $\beta$ -catenin in SK-MEL-30 cells following treatment with CHIR-99021 (CHIR).
- (C)** Graph of MITF promoter activity of SK-MEL-30 cells with TSC1 or TSC2 knockdowns treated with or without 3  $\mu$ M CHIR-99021 (CHIR), measured using pGL3-Luciferase empty vector or MITF-PGL3-luciferase.
- (D)** Cells treated as in **(C)** were analyzed by quantitative RT-PCR for MITF-M and TYR mRNA levels.
- (E)** Pigmentation is restored in cells treated with CHIR-99021 (CHIR).
- Data in **(C-D)** are presented as mean  $\pm$  S.D. from at least three independent experiments. \*,  $p < 0.05$ .
- (F-J)** Entirely similar to **(A-E)**, except using the GSK3 $\beta$  specific inhibitor AR-A014418 (ARA) (5 $\mu$ M) for 5 days.
- (K-N)** Entirely similar to **(A, C-E)**, except using the GSK3 $\beta$  specific inhibitor BIO (2 $\mu$ M) for 5 days.

Fig. S6 related to Figures 7 and 8

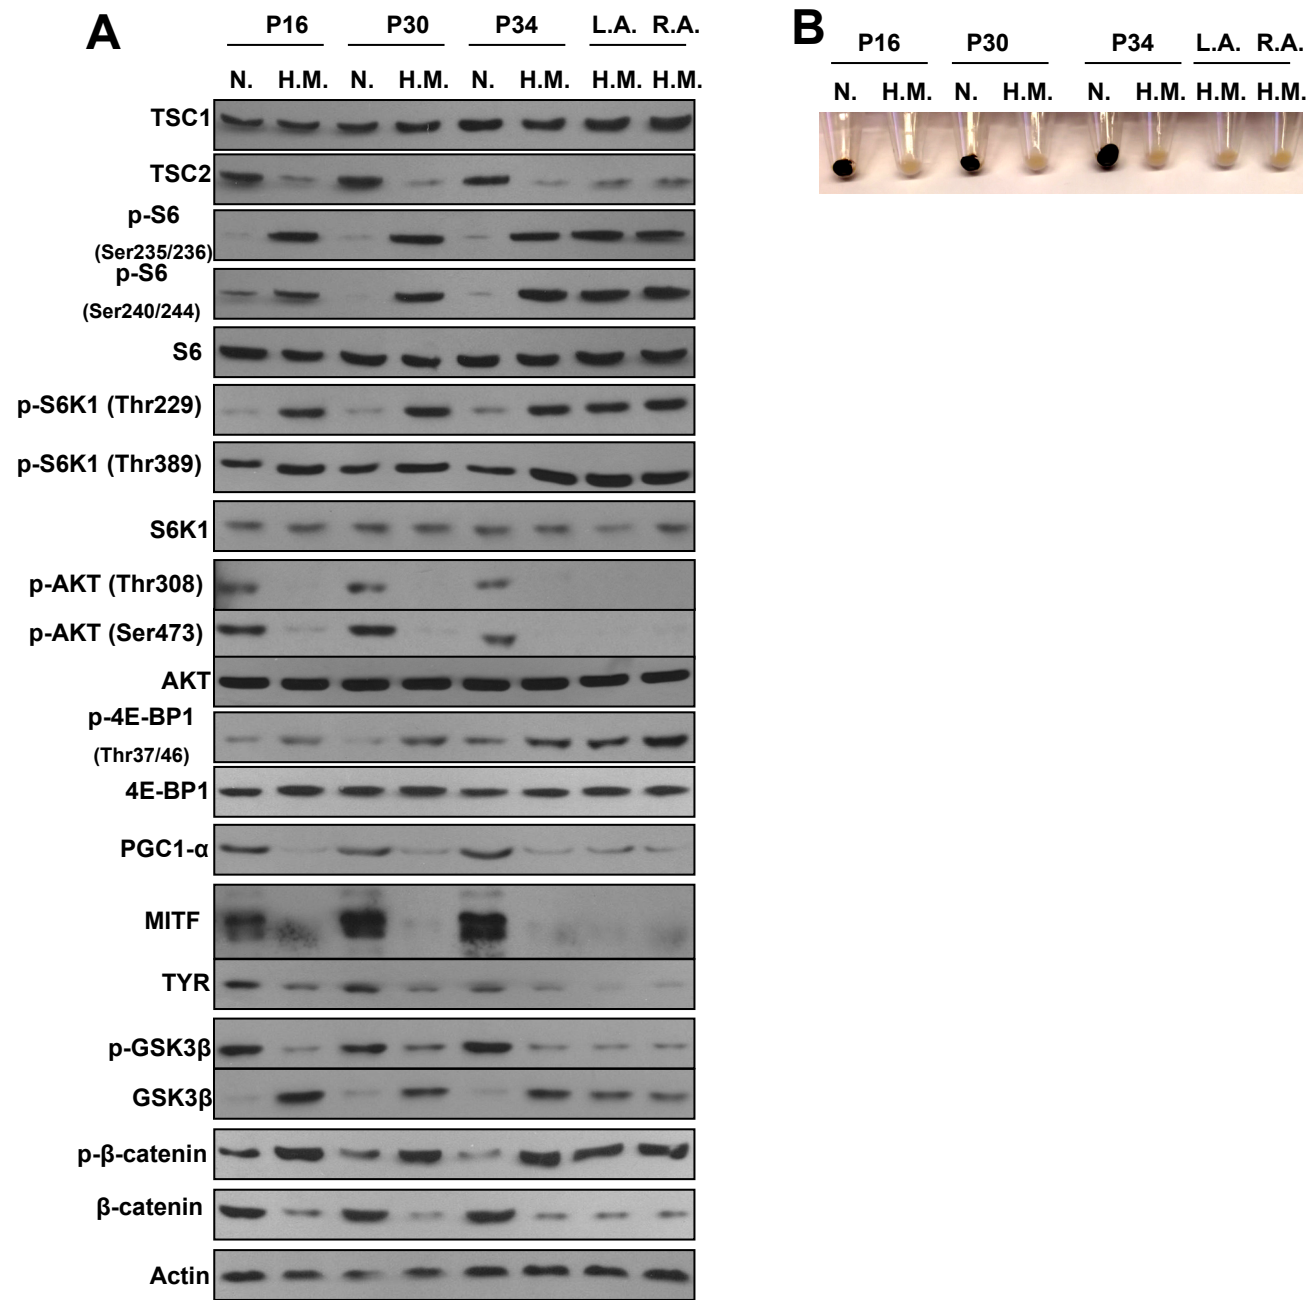

**Figure S6. mTORC1 is Hyperactive in Melanocytes Isolated from TSC Patient Hypomelanotic Macules.**

(A) Immunoblot analysis of primary melanocytes isolated from hypomelanotic macules (HMs) and nearby normal skin from 4 TSC patients, P16, P30, P34, and two lesions (L.A. and R.A.) from one patient. Note activation of mTORC1 in the melanocytes from the hypomelanotic macules (HMs) with reduction in MITF, PGC-1α, TYR, and β-catenin, with an increase in GSK3β. (B) Pigmentation of melanocytes analyzed in (A).



Full unedited blot images for Figures 1-8

Note: for all gels, blots were cut for different antibody staining and exposed on the same film

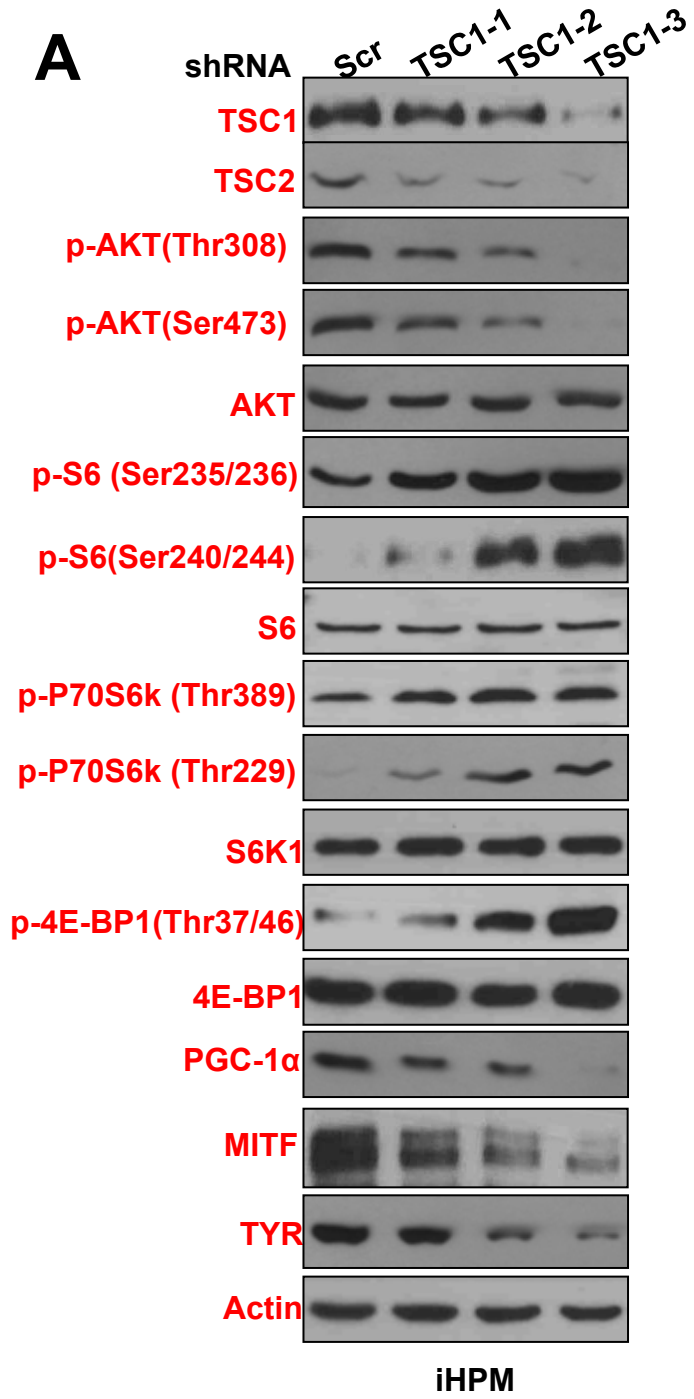

TSC1    p-S6(Ser240/244)    S6K1    4E-BP1    Actin

Run on same gel, **Actin** in the figure was used as the loading control

parallel gel 1

S6                      MITF

Run on same gel, **S6** in the figure was used as the loading control, no extra loading control needed

parallel gel 2

p-AKT(Thr308)    p-AKT(Ser473)                      AKT    p-S6 (Ser235/236)    PGC-1α    TYR

Run on same gel, **AKT** in the figure was used as the loading control, no extra loading control needed

parallel gel 3

TSC2    p-P70S6k (Thr229)

Run on same gel, **Actin** was used as the loading control (see uncropped gel image)

parallel gel 4

p-P70S6k (Thr389)    p-4E-BP1(Thr37/46)

Run on same gel, **Actin** was used as the loading control (see uncropped gel image)

Figure 1

**A**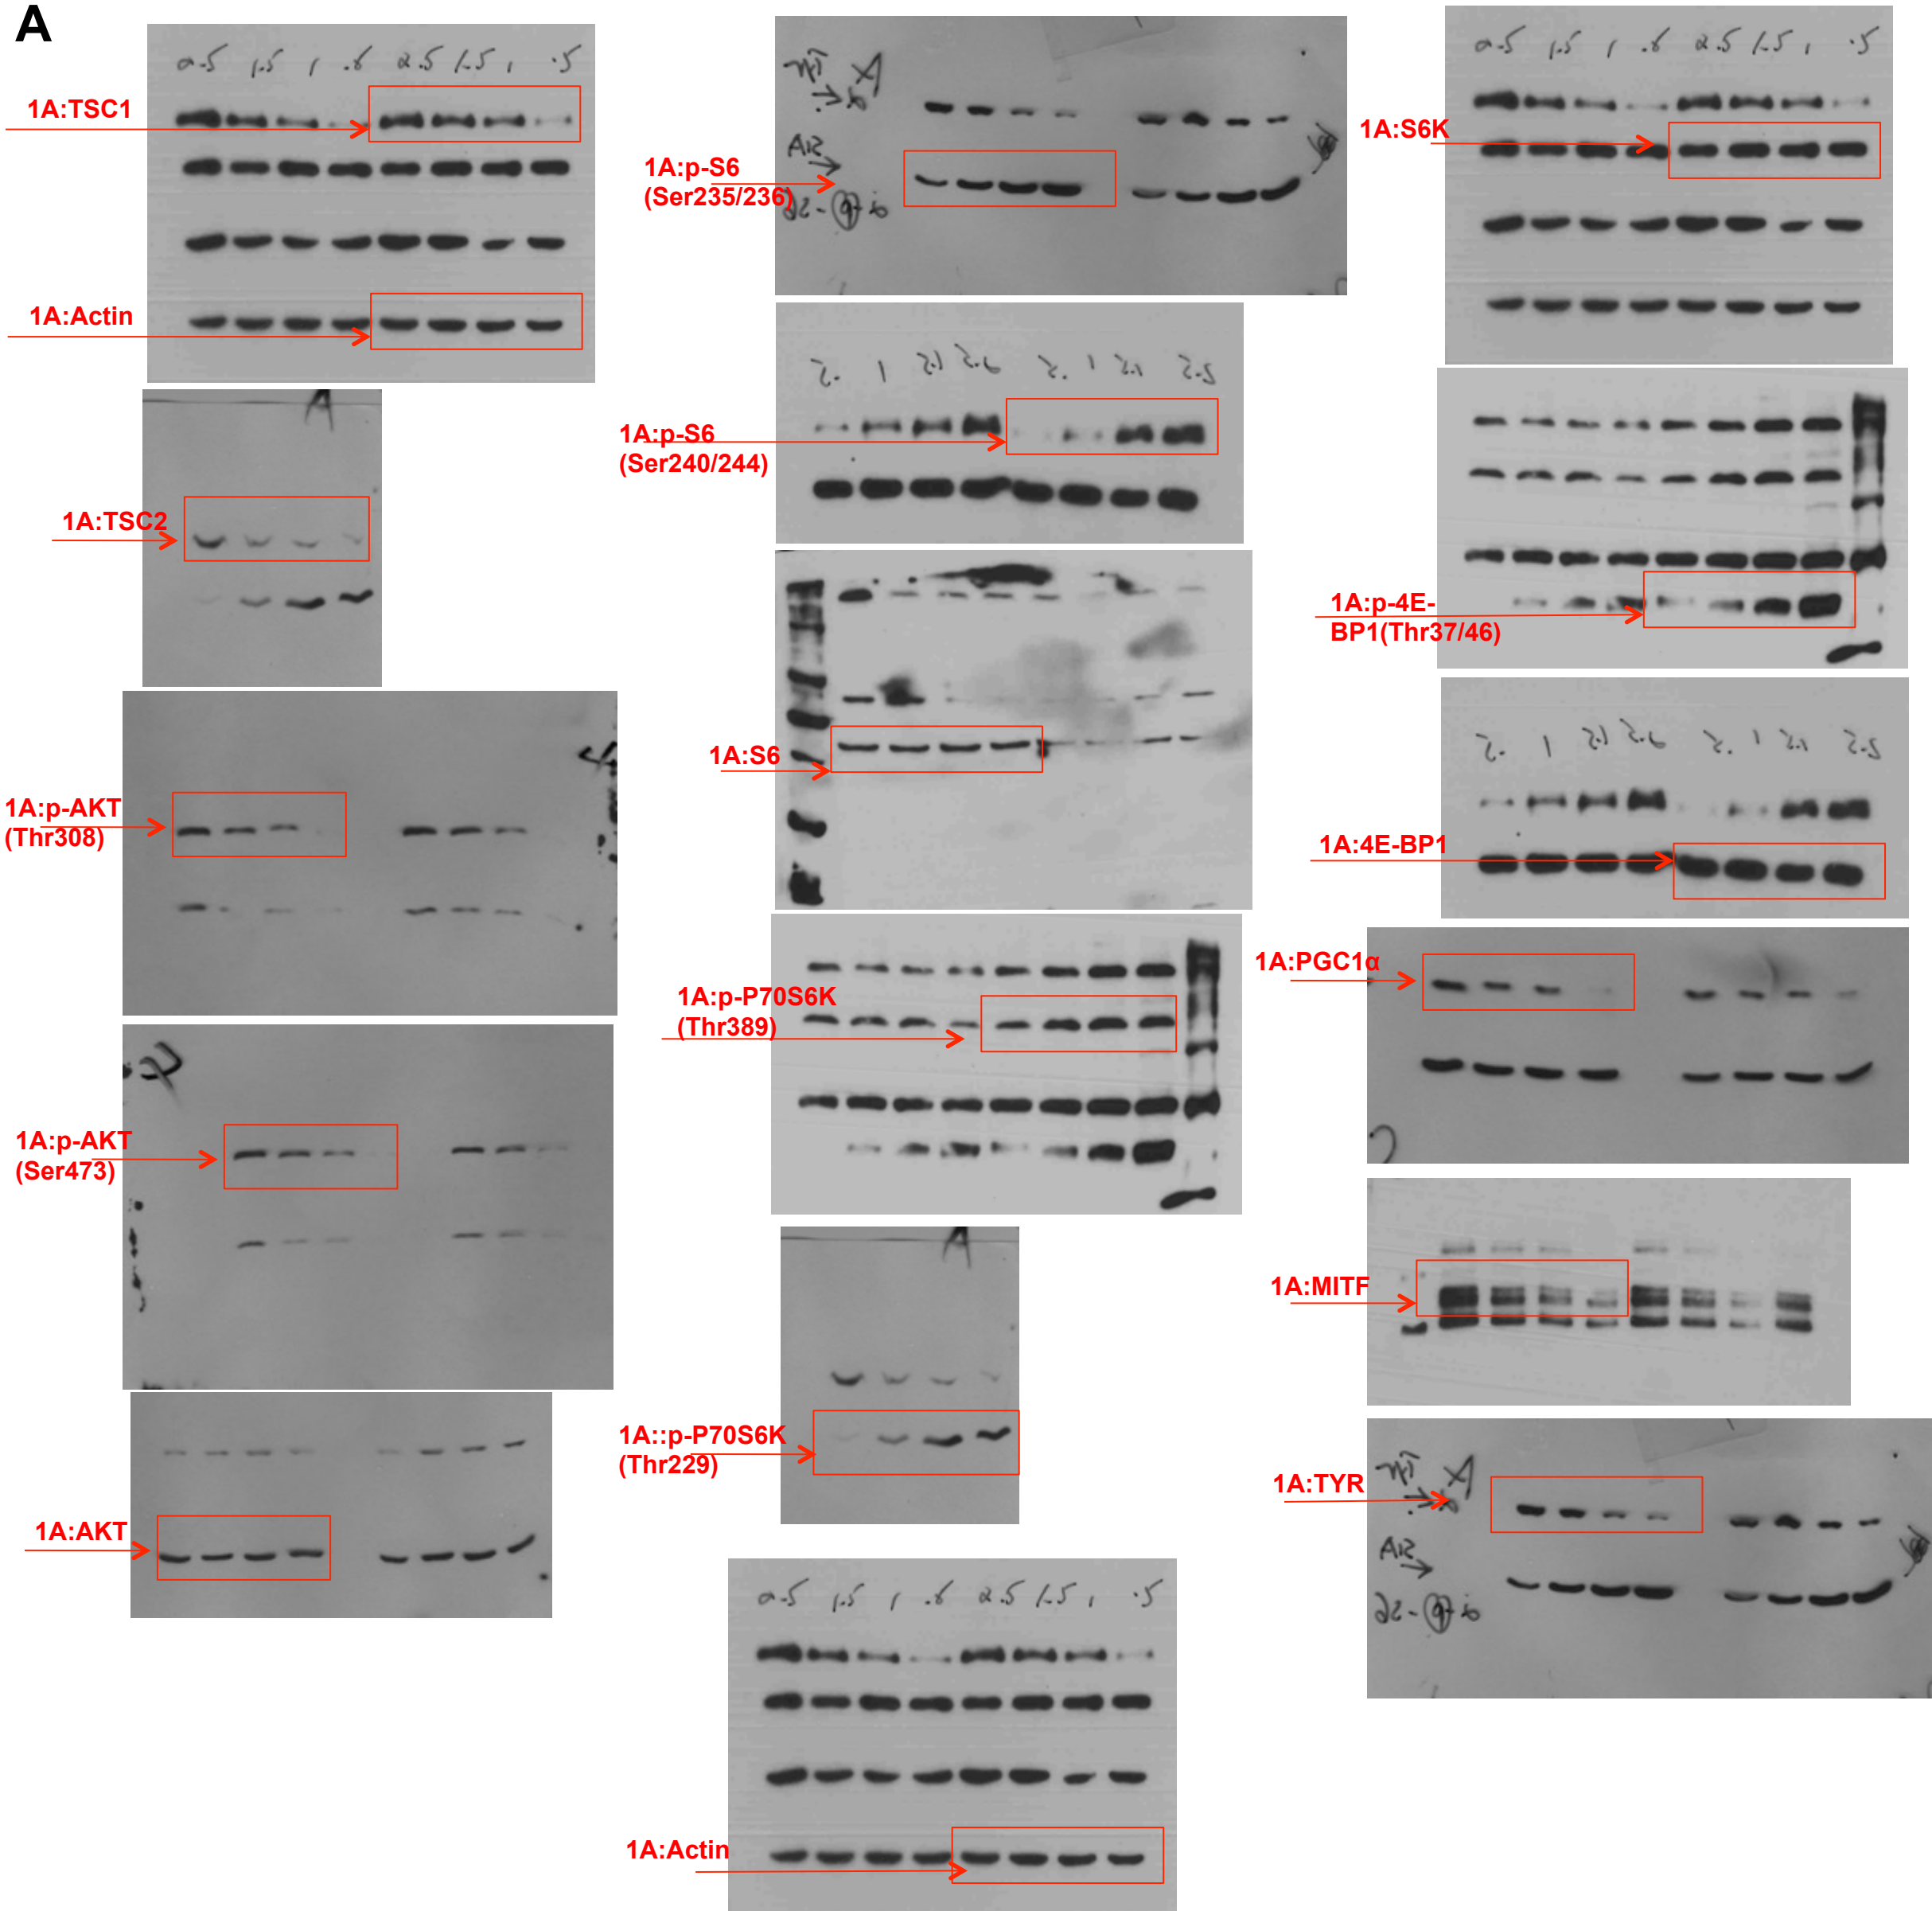

Full unedited gel for Figure 1A

Figure 1

# Loading controls for parallel gels in figure 1A

parallel gel 1

1A:

→ S6 was the control as shown in the figure

parallel gel 2

1A:

→ AKT was the control as shown in the figure

parallel gel 3

1A:Actin

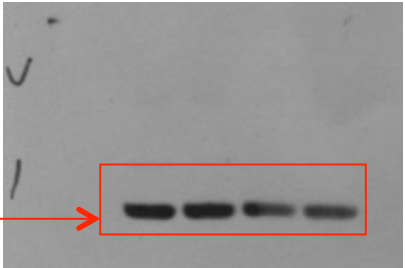

parallel gel 4

1A:Actin

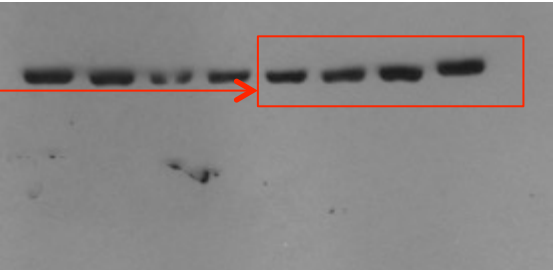

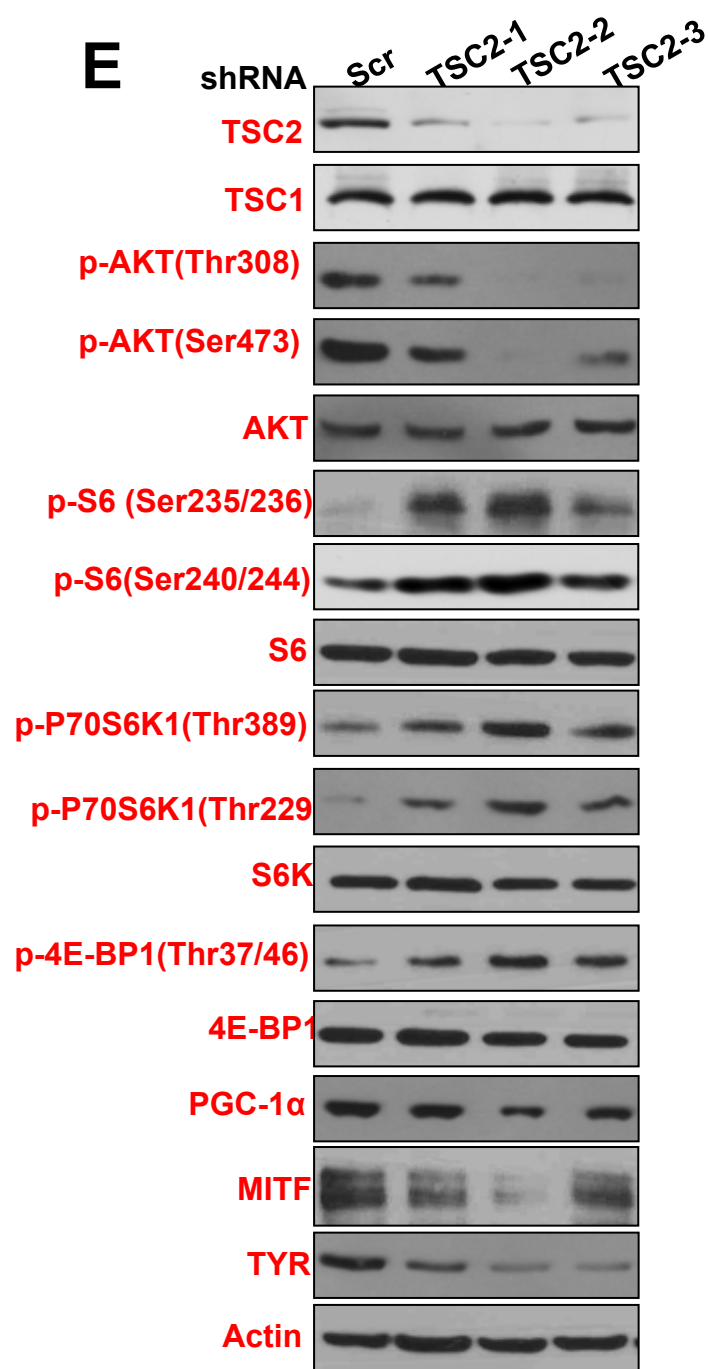

p-AKT(Thr308)    p-AKT(Ser473)    AKT    p-P70S6K1(Thr229)    PGC-1α    TYR

Run on same gel, **AKT** in the figure was used as the loading control, no extra loading control needed

parallel gel 1

p-S6(Ser240/244)    S6    S6K    4E-BP1    Actin

Run on same gel, **Actin** in the figure was used as the loading control

parallel gel 2

**TSC1**

Run on same gel, **Actin** was used as the loading control (see uncropped gel image)

parallel gel 3

**TSC2**

Run on same gel, **Actin** was used as the loading control (see uncropped gel image)

parallel gel 4

p-S6 (Ser235/236)

Run on same gel, **Actin** was used as the loading control (see uncropped gel image)

parallel gel 5

p-P70S6K1(Thr389)    p-4E-BP1(Thr37/46)    MITF

Run on same gel, **Actin** was used as the loading control (see uncropped gel image)

Figure 1

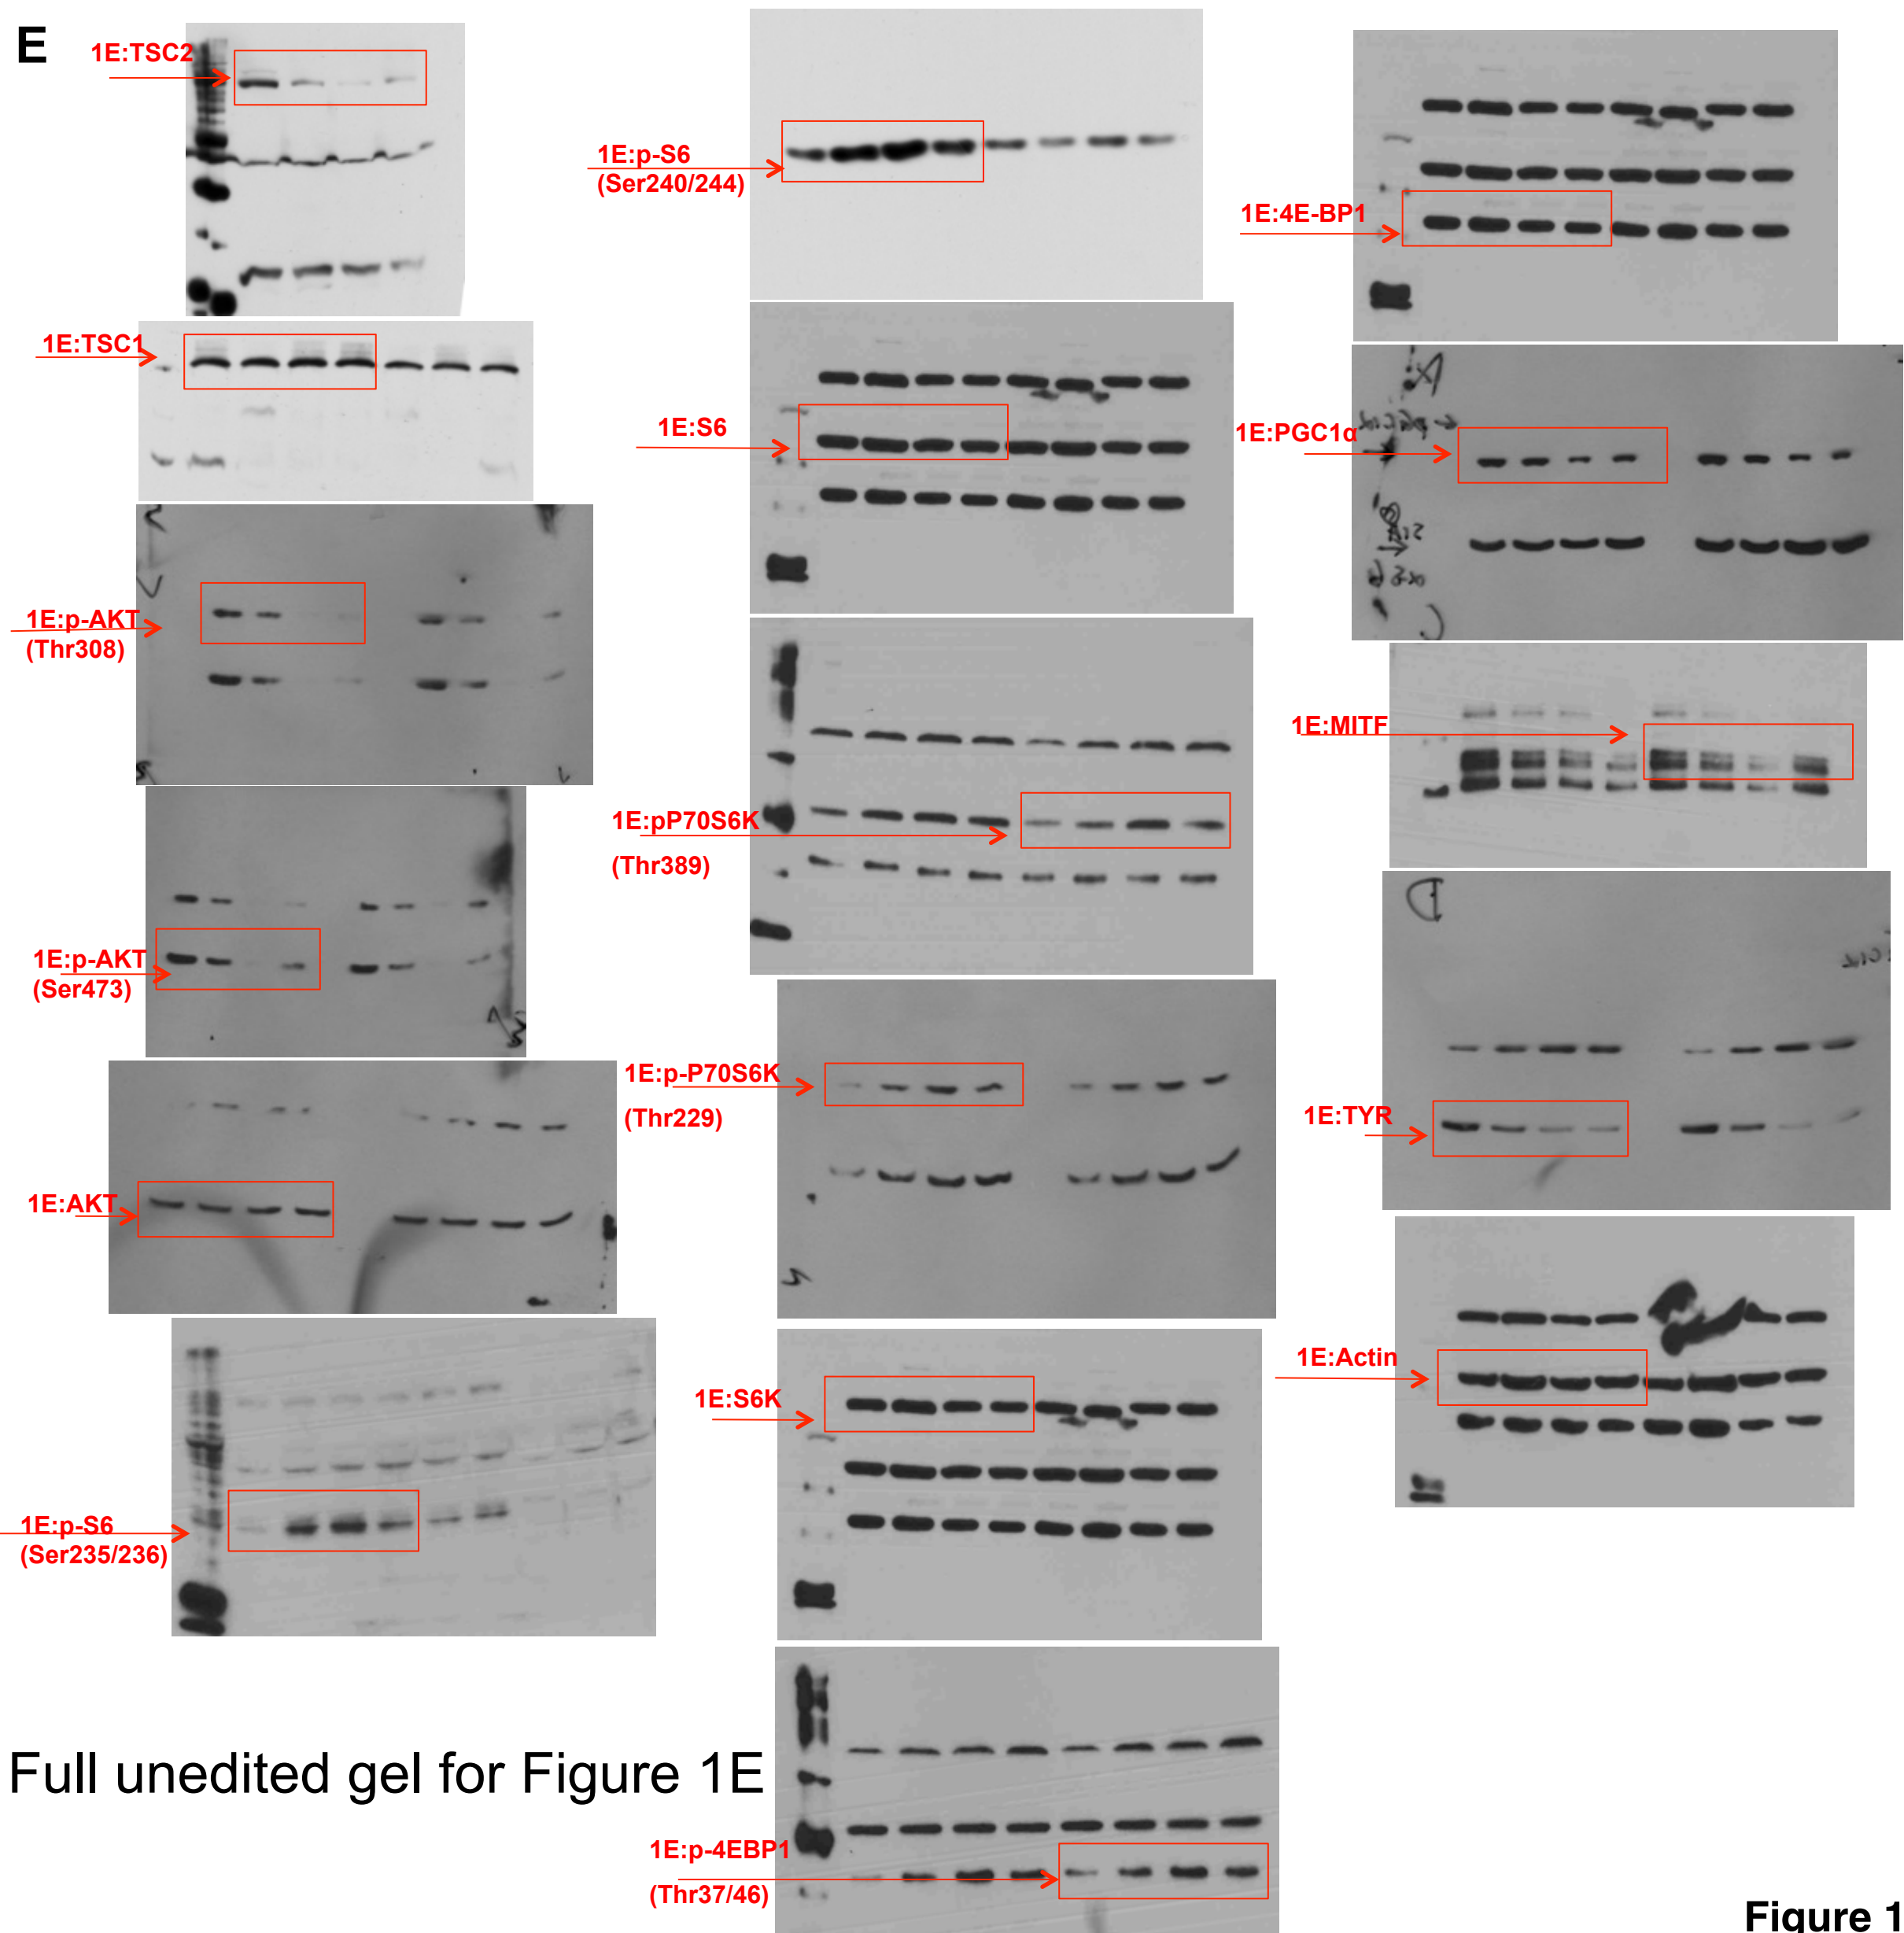

# Loading controls for parallel gels in figure 1E

parallel gel 1

1E:

→ Actin, as shown in the figure, was the control

Parallel gel 2

1E:Actin

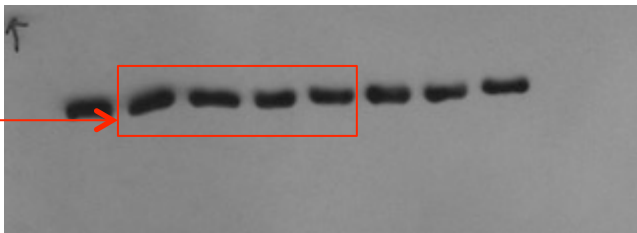

Parallel gel 3

1E:Actin

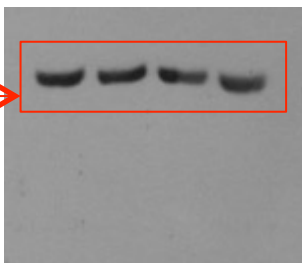

Parallel gel 4

1E:Actin

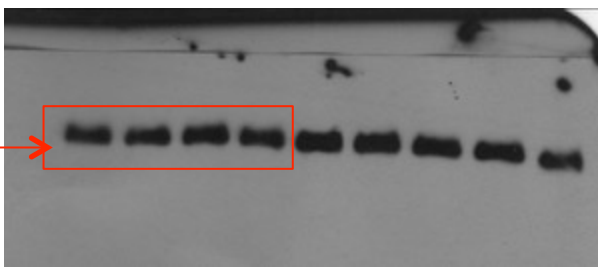

Parallel gel 5

1E:Actin

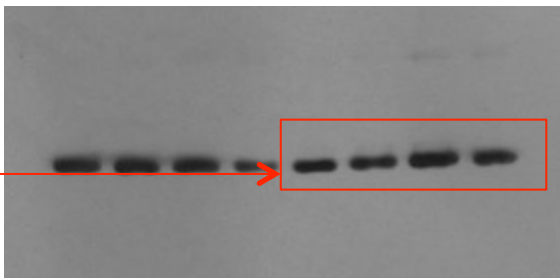

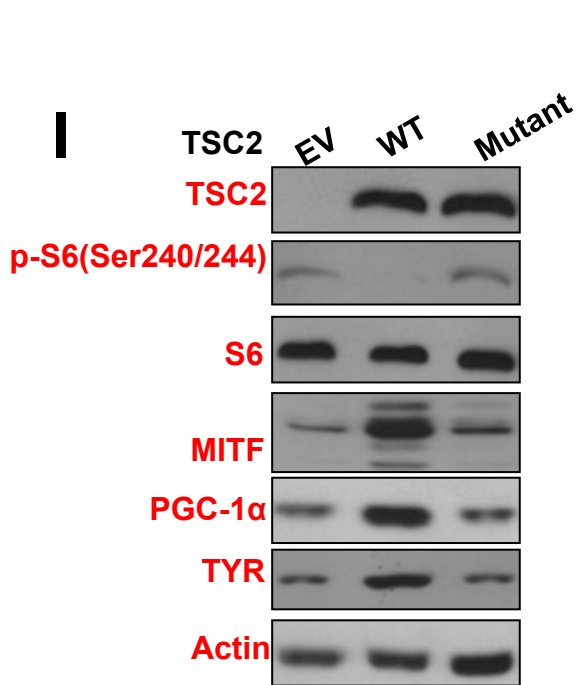

**PGC-1 $\alpha$**       **Actin**

---

Run on same gel, **Actin** in the figure was used as the loading control

parallel gel 1

**TSC2**   **p-S6(Ser240/244)**    **S6**    **MITF**   **TYR**

---

Run on same gel, **S6** in the figure was used as the loading control, no extra loading control needed

**Figure 1**



# Full unedited gel for Figure 1I

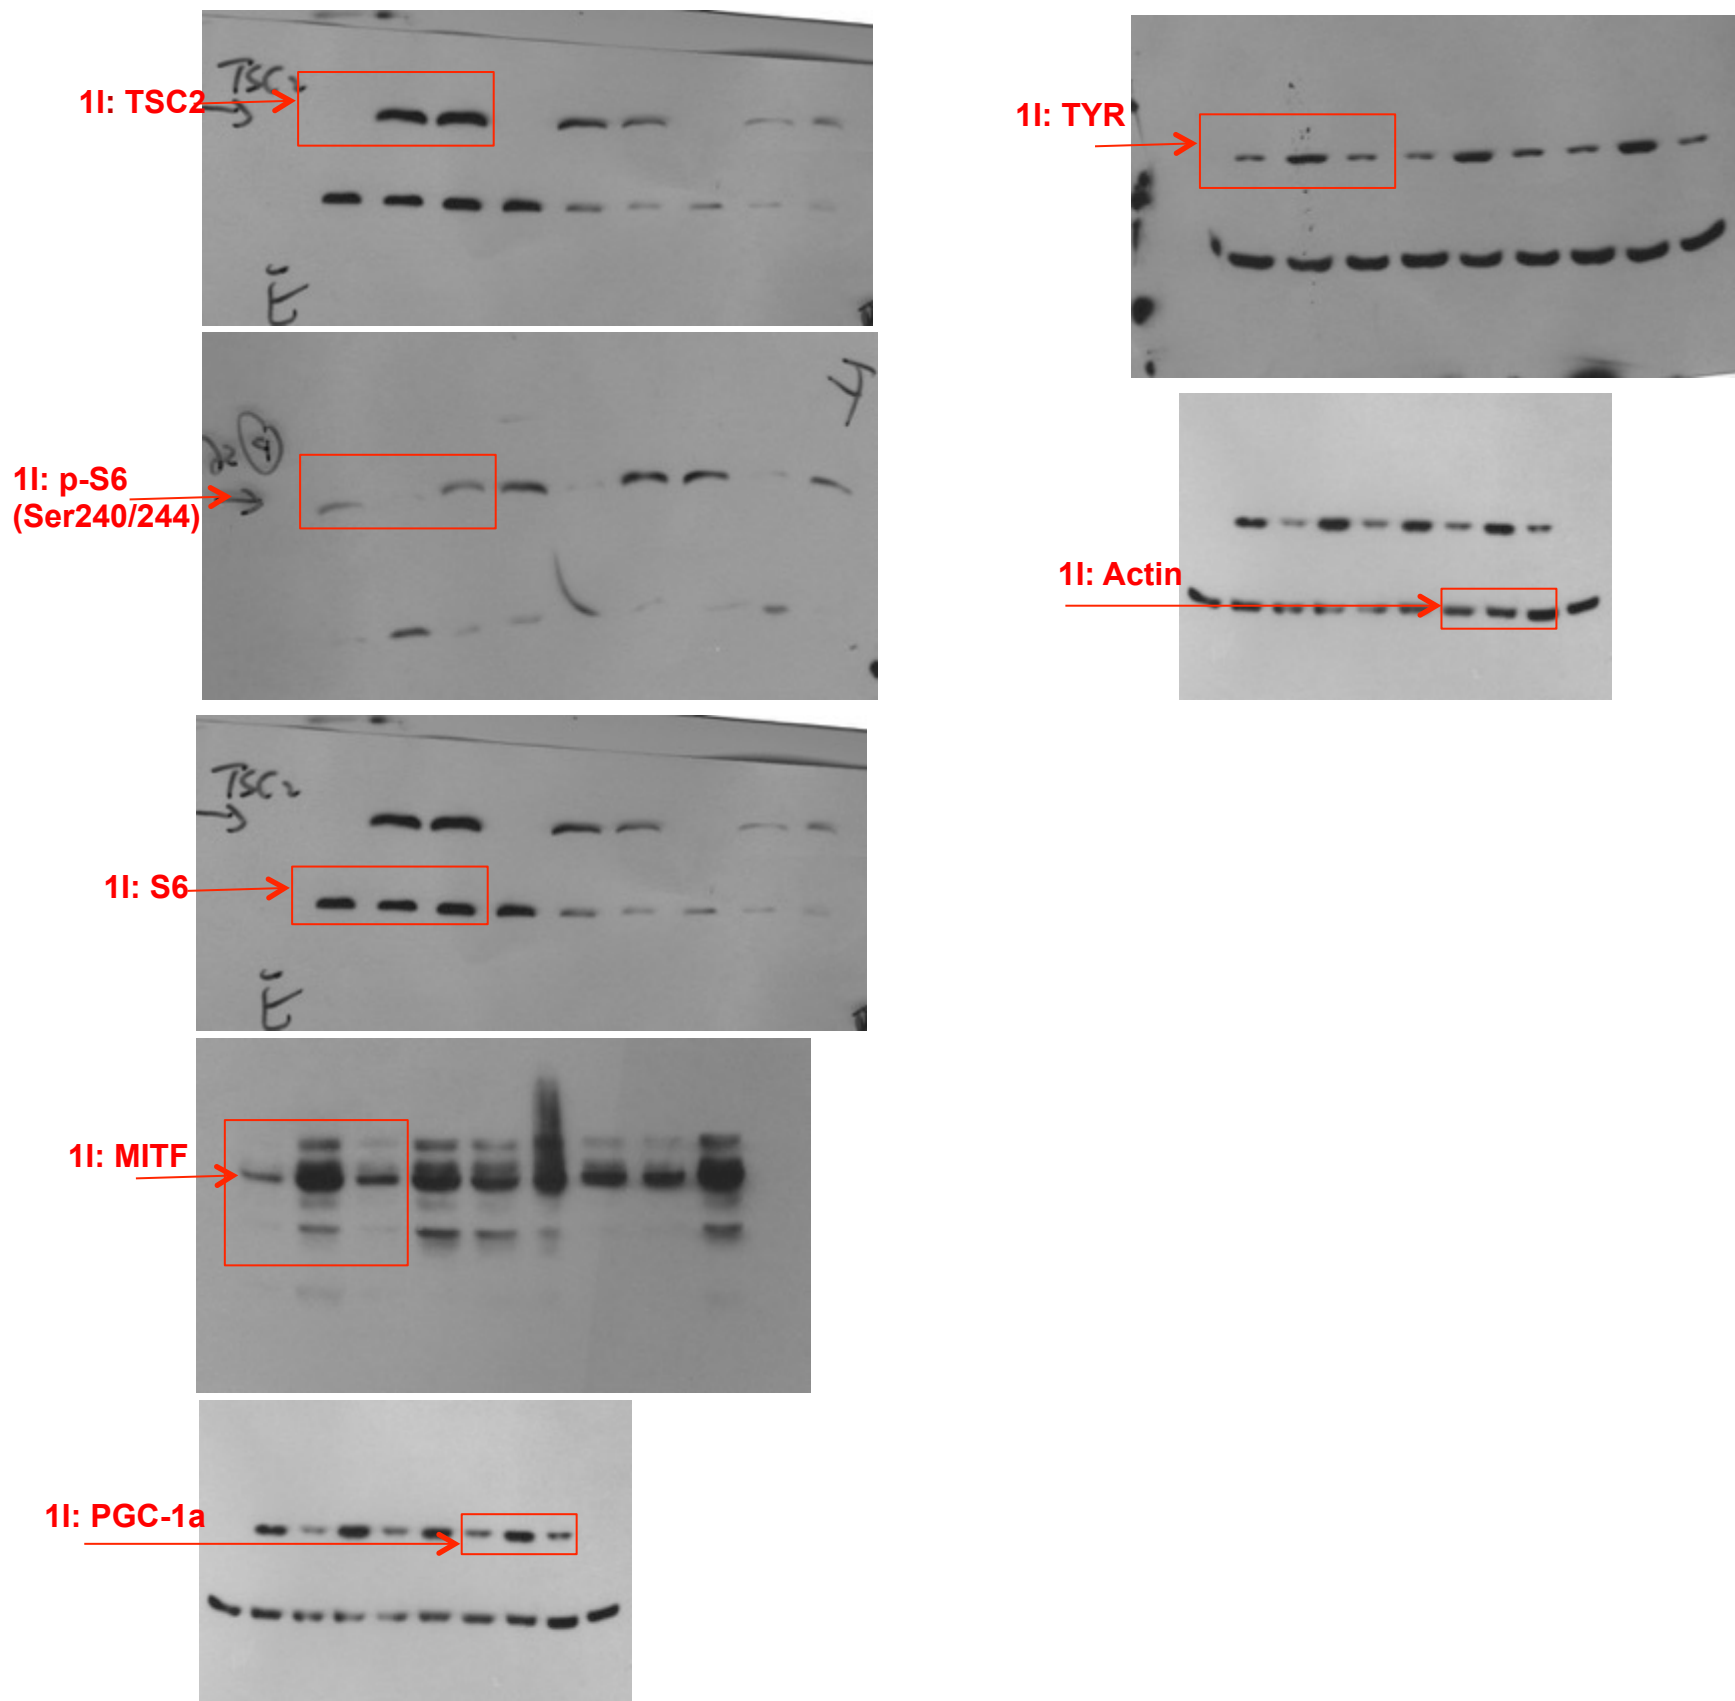

Figure 1

# Loading controls for parallel gels in figure 1I

parallel gel 1

1I:

→ No extra loading control needed

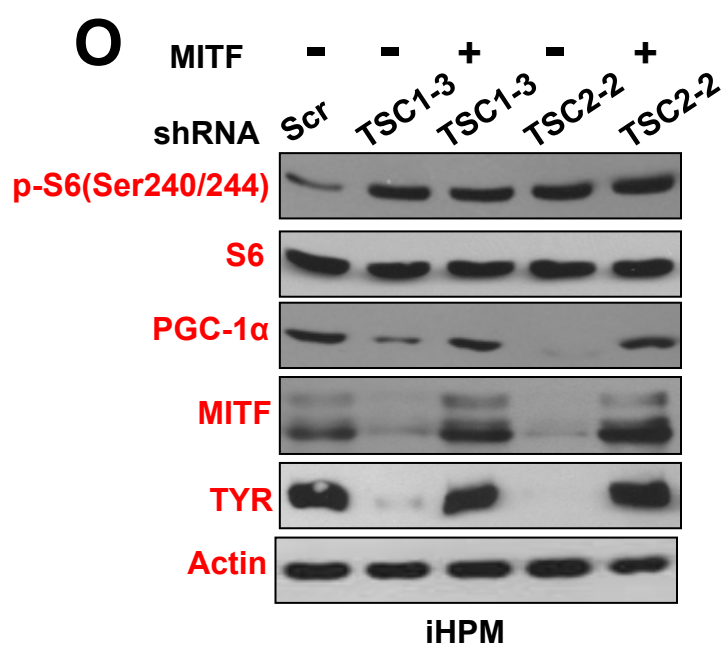

**MITF** **Actin**

Run on same gel, **Actin** in the figure was used as the loading control

parallel gel 1

**p-S6(Ser240/244)** **S6** **PGC-1α**

Run on same gel, **S6** in the figure was used as the loading control, no extra loading control needed

parallel gel 2

**TYR**

Run on same gel, **Actin** was used as the loading control (see uncropped gel image)

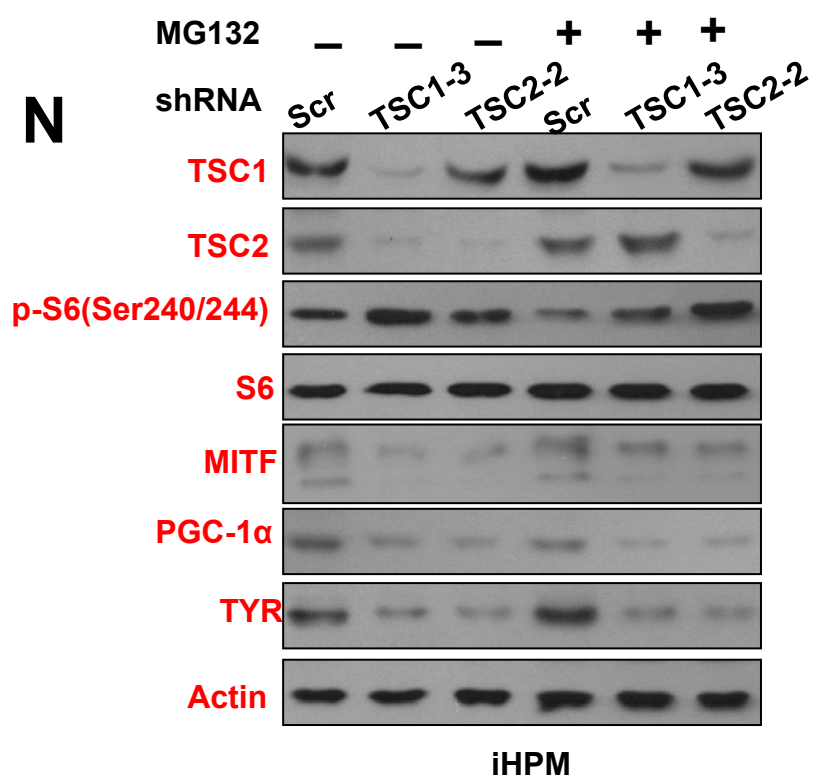

**TSC1** **S6** **Actin**

Run on same gel, **Actin** in the figure was used as the loading control

parallel gel 1

**TSC2** **p-S6(Ser240/244)** **MITF** **PGC-1α** **TYR**

Run on same gel, **Actin** was used as the loading control (see uncropped gel image)

**Figure 1**

Full unedited gel for Figure 1O&N

O

10:pS6  
(Ser240/244)

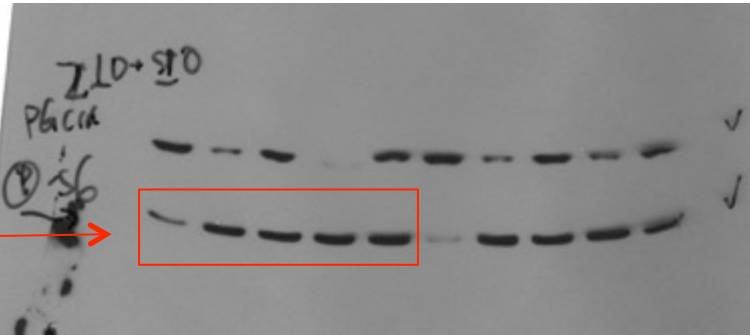

10: S6

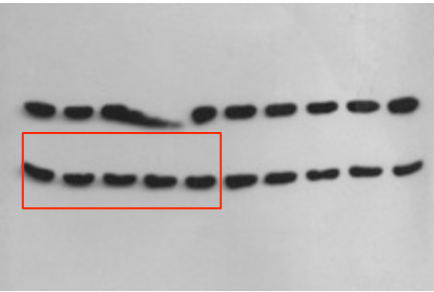

10: PGC-1a

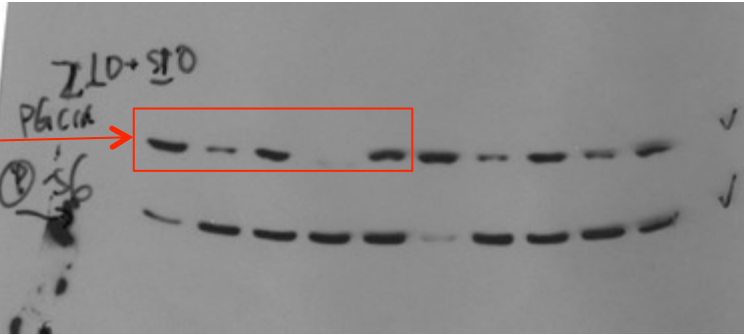

10: MITF

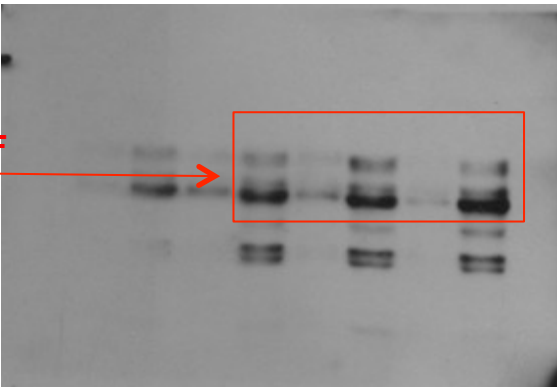

10: Actin

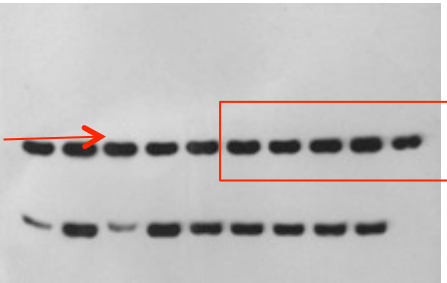

10: TYR

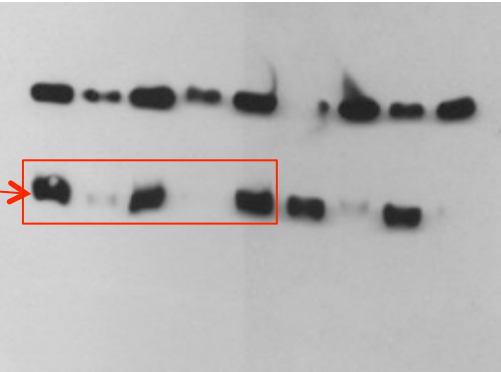

N

1N: TSC1

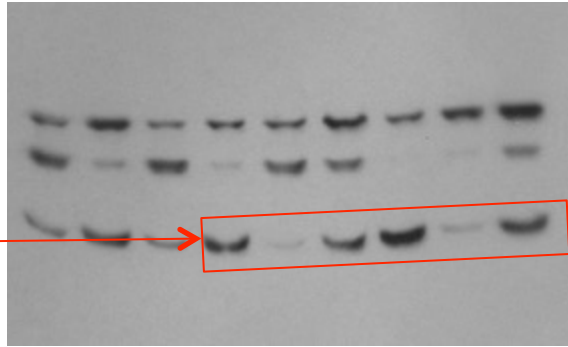

1N: S6

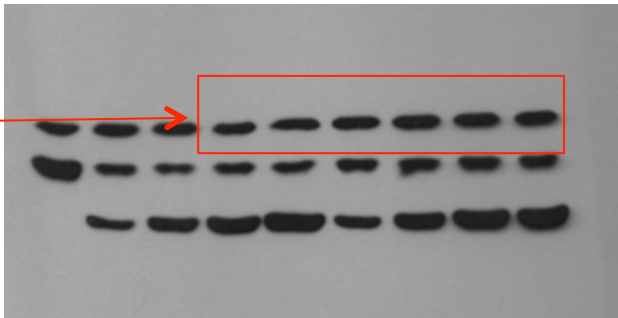

1N: TYR

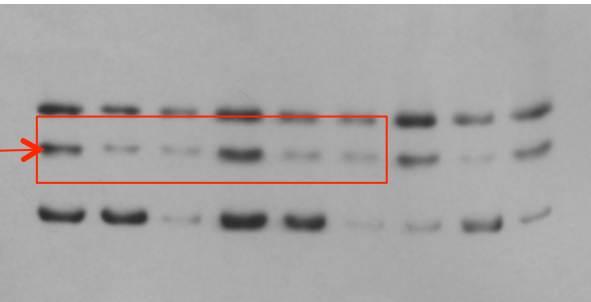

1N: TSC2

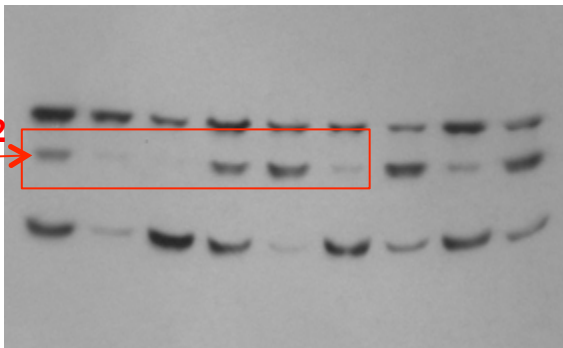

1N: MITF

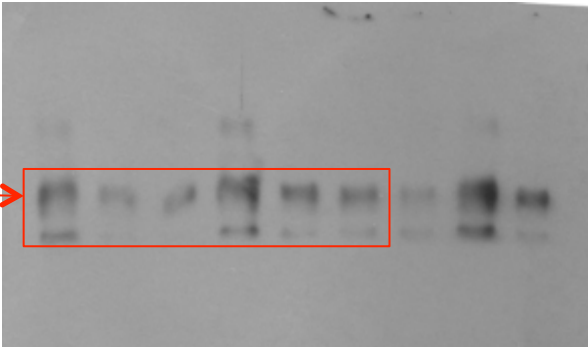

1N: Actin

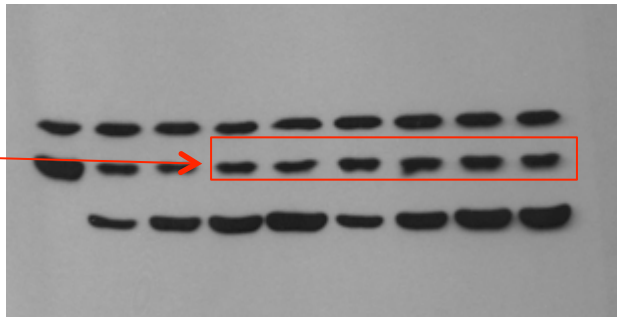

1N: p-S6  
(Ser240/244)

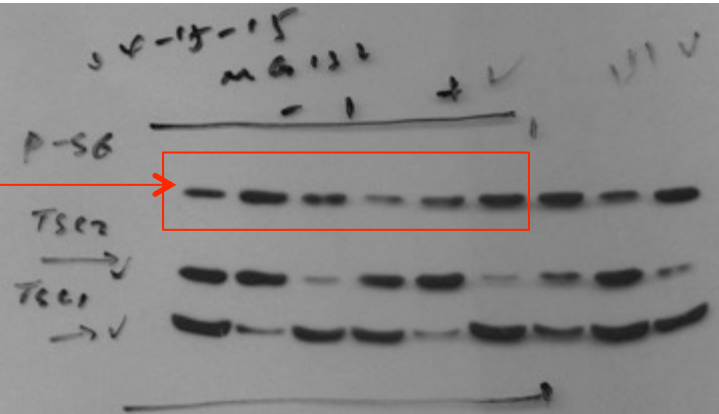

1N:PGC-1a

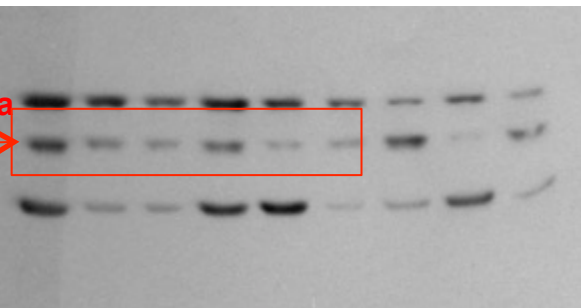

Figure 1

Loading controls for parallel gels in figure 1N

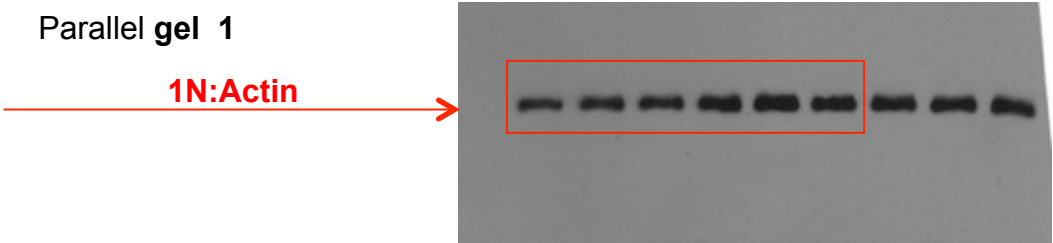

Loading controls for parallel gels in figure 1O

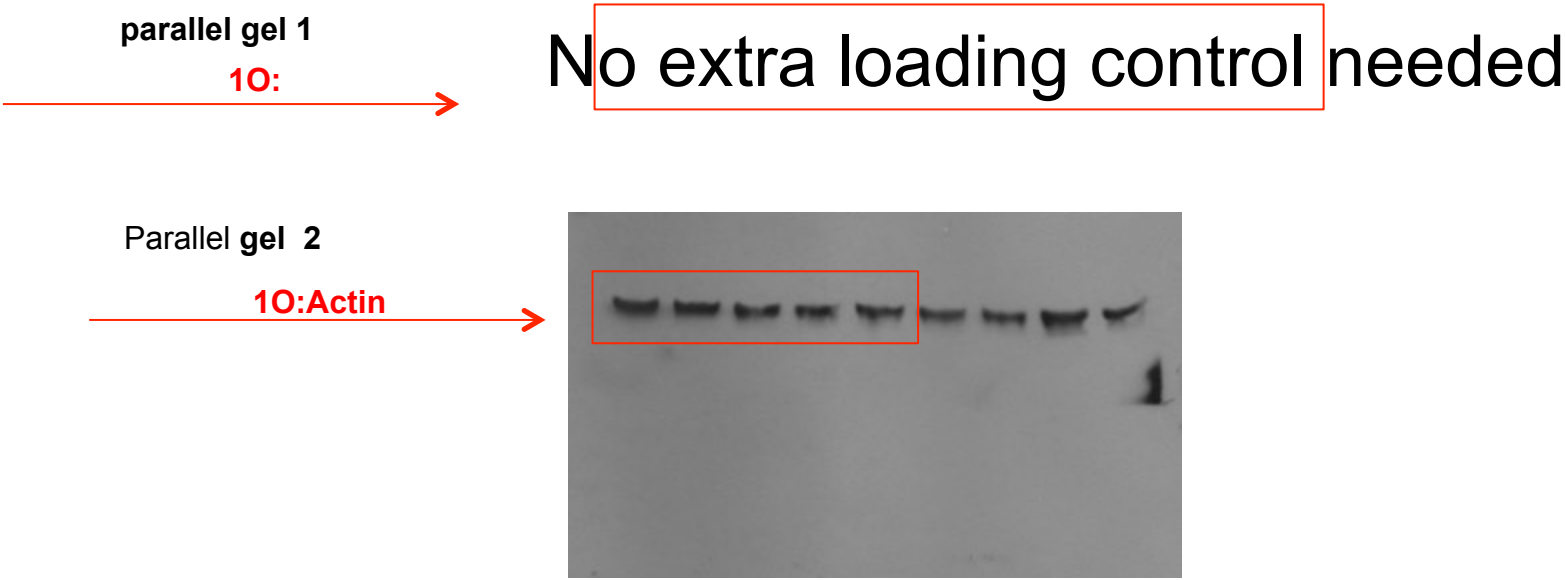

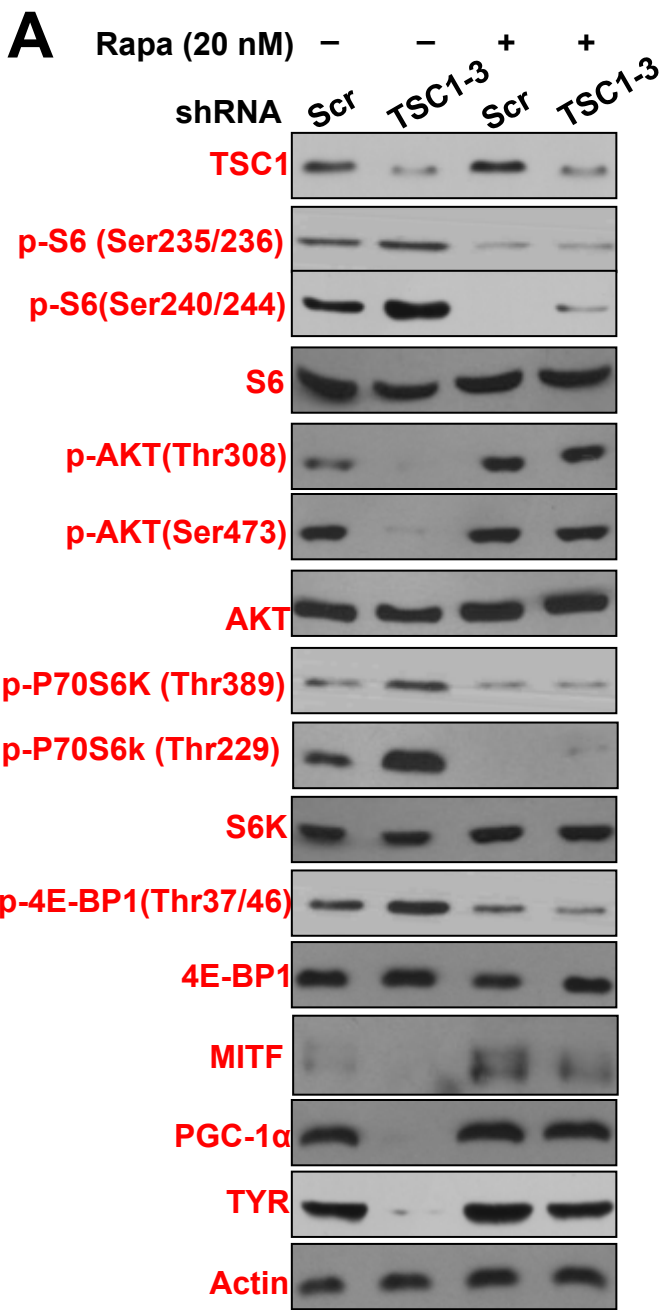

S6    AKT    p-P70S6k (Thr229)    S6K    4E-BP1    PGC-1α    Actin

Run on same gel, **Actin** in the figure was used as the loading control

parallel gel 1

TSC1    p-S6 (Ser235/236)    p-P70S6K (Thr389)    p-4E-BP1(Thr37/46)    MITF

Run on same gel, **Actin** was used as the loading control (see uncropped gel image)

parallel gel 2

p-S6(Ser240/244)    TYR

Run on same gel, **Actin** was used as the loading control (see uncropped gel image)

parallel gel 3

p-AKT(Thr308)    p-AKT(Ser473)

Run on same gel, **Actin** was used as the loading control (see uncropped gel image)

Figure 2

A Full unedited gel for Figure 2A

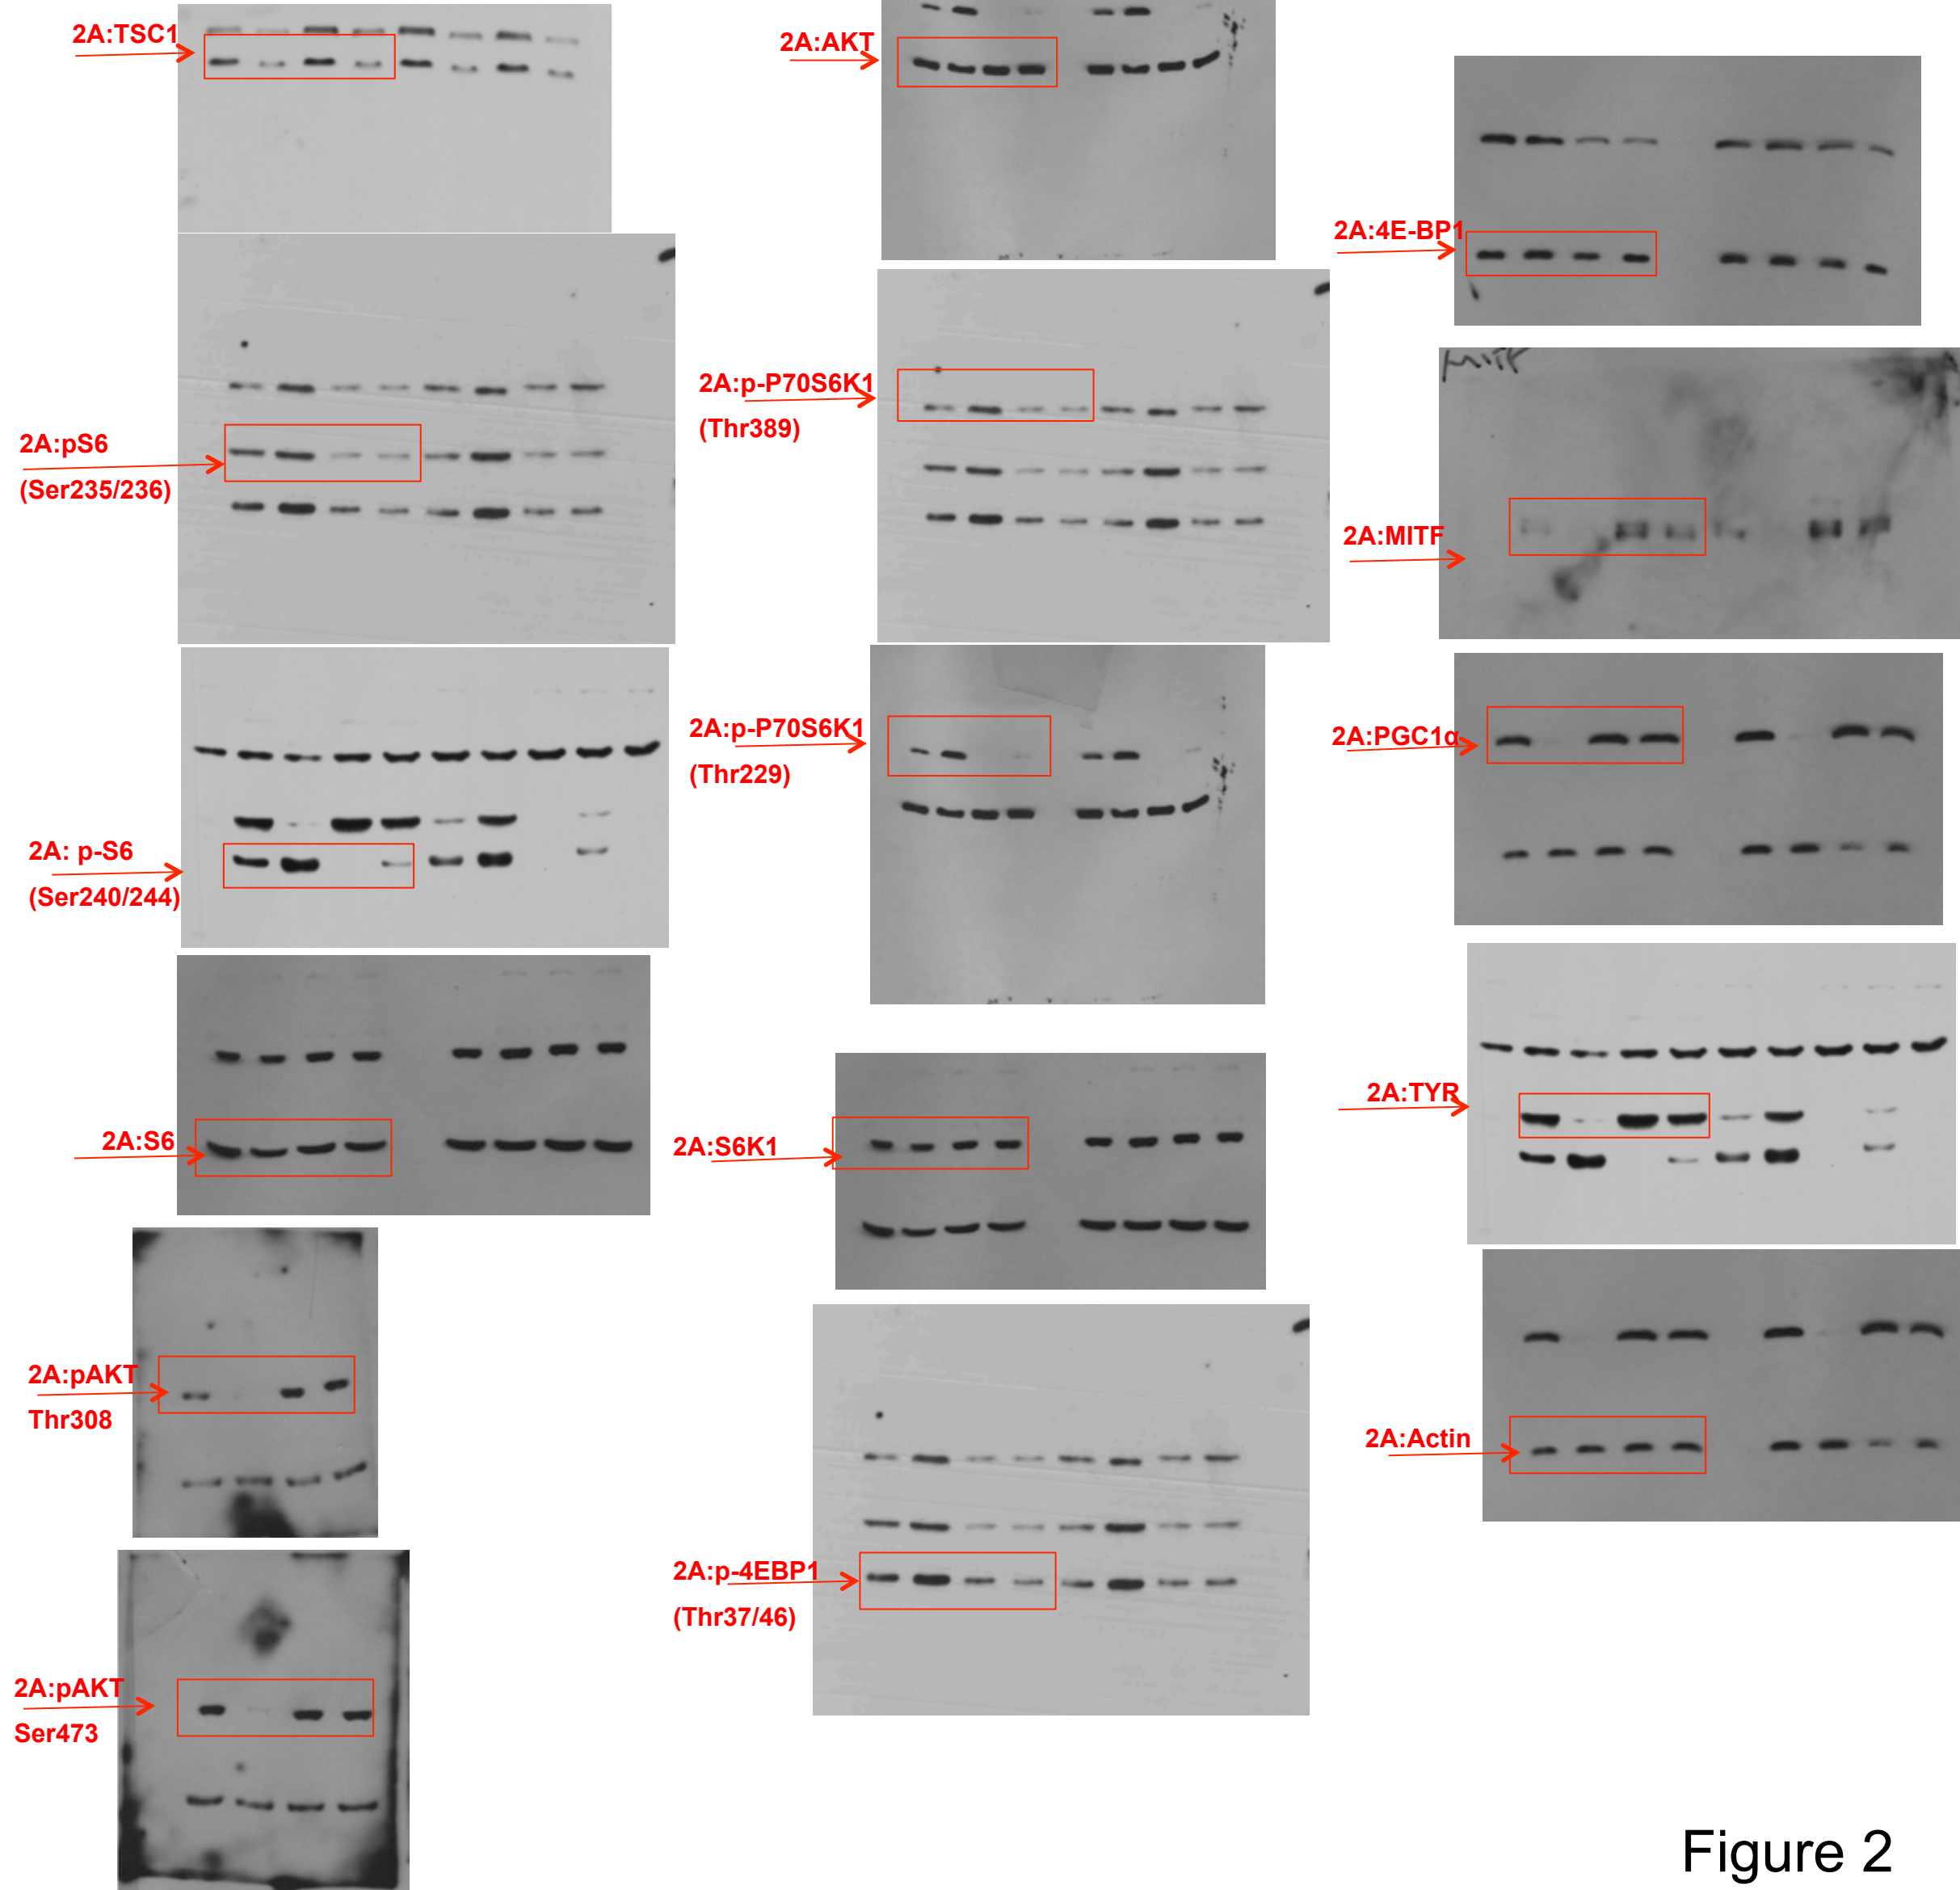

Figure 2

# Loading controls for parallel gels in figure 2A

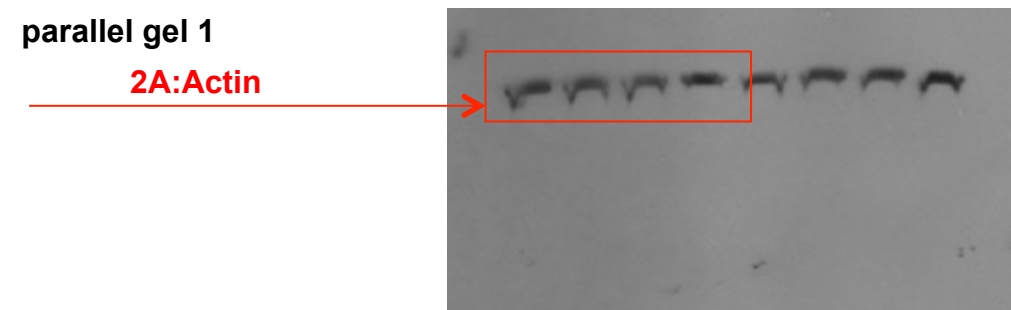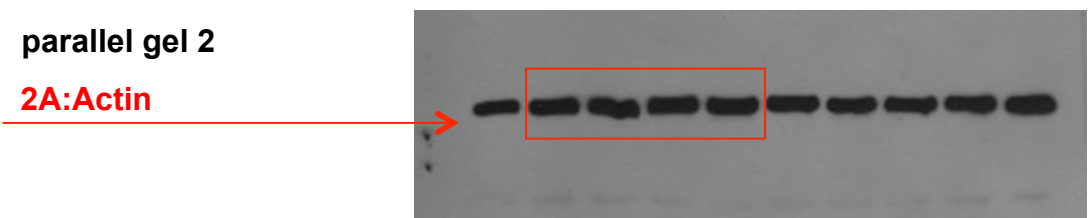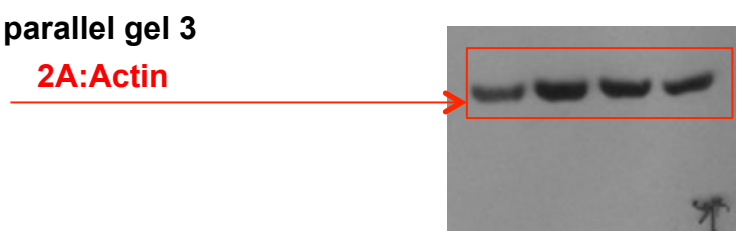



E

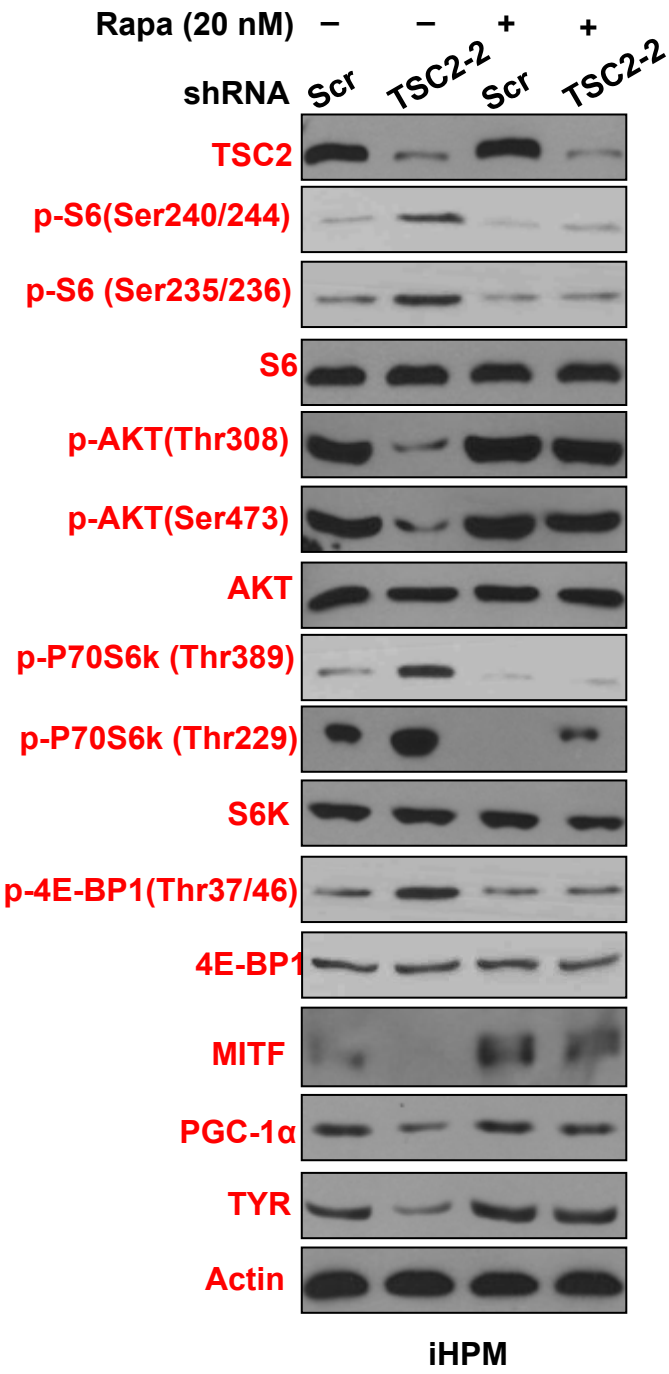

TSC2 S6 p-AKT(Thr308) p-AKT(Ser473) AKT p-P70S6k (Thr229) S6K PGC-1α TYR Actin

Run on same gel, **Actin** in the figure was used as the loading control

parallel gel 1

p-S6(Ser240/244) p-S6 (Ser235/236) p-P70S6k (Thr389) p-4E-BP1(Thr37/46) 4E-BP1 MITF

Run on same gel, **4E-BP1** was used as the loading control (see uncropped gel image)

Figure 2

E

# Full unedited gel for Figure 2E

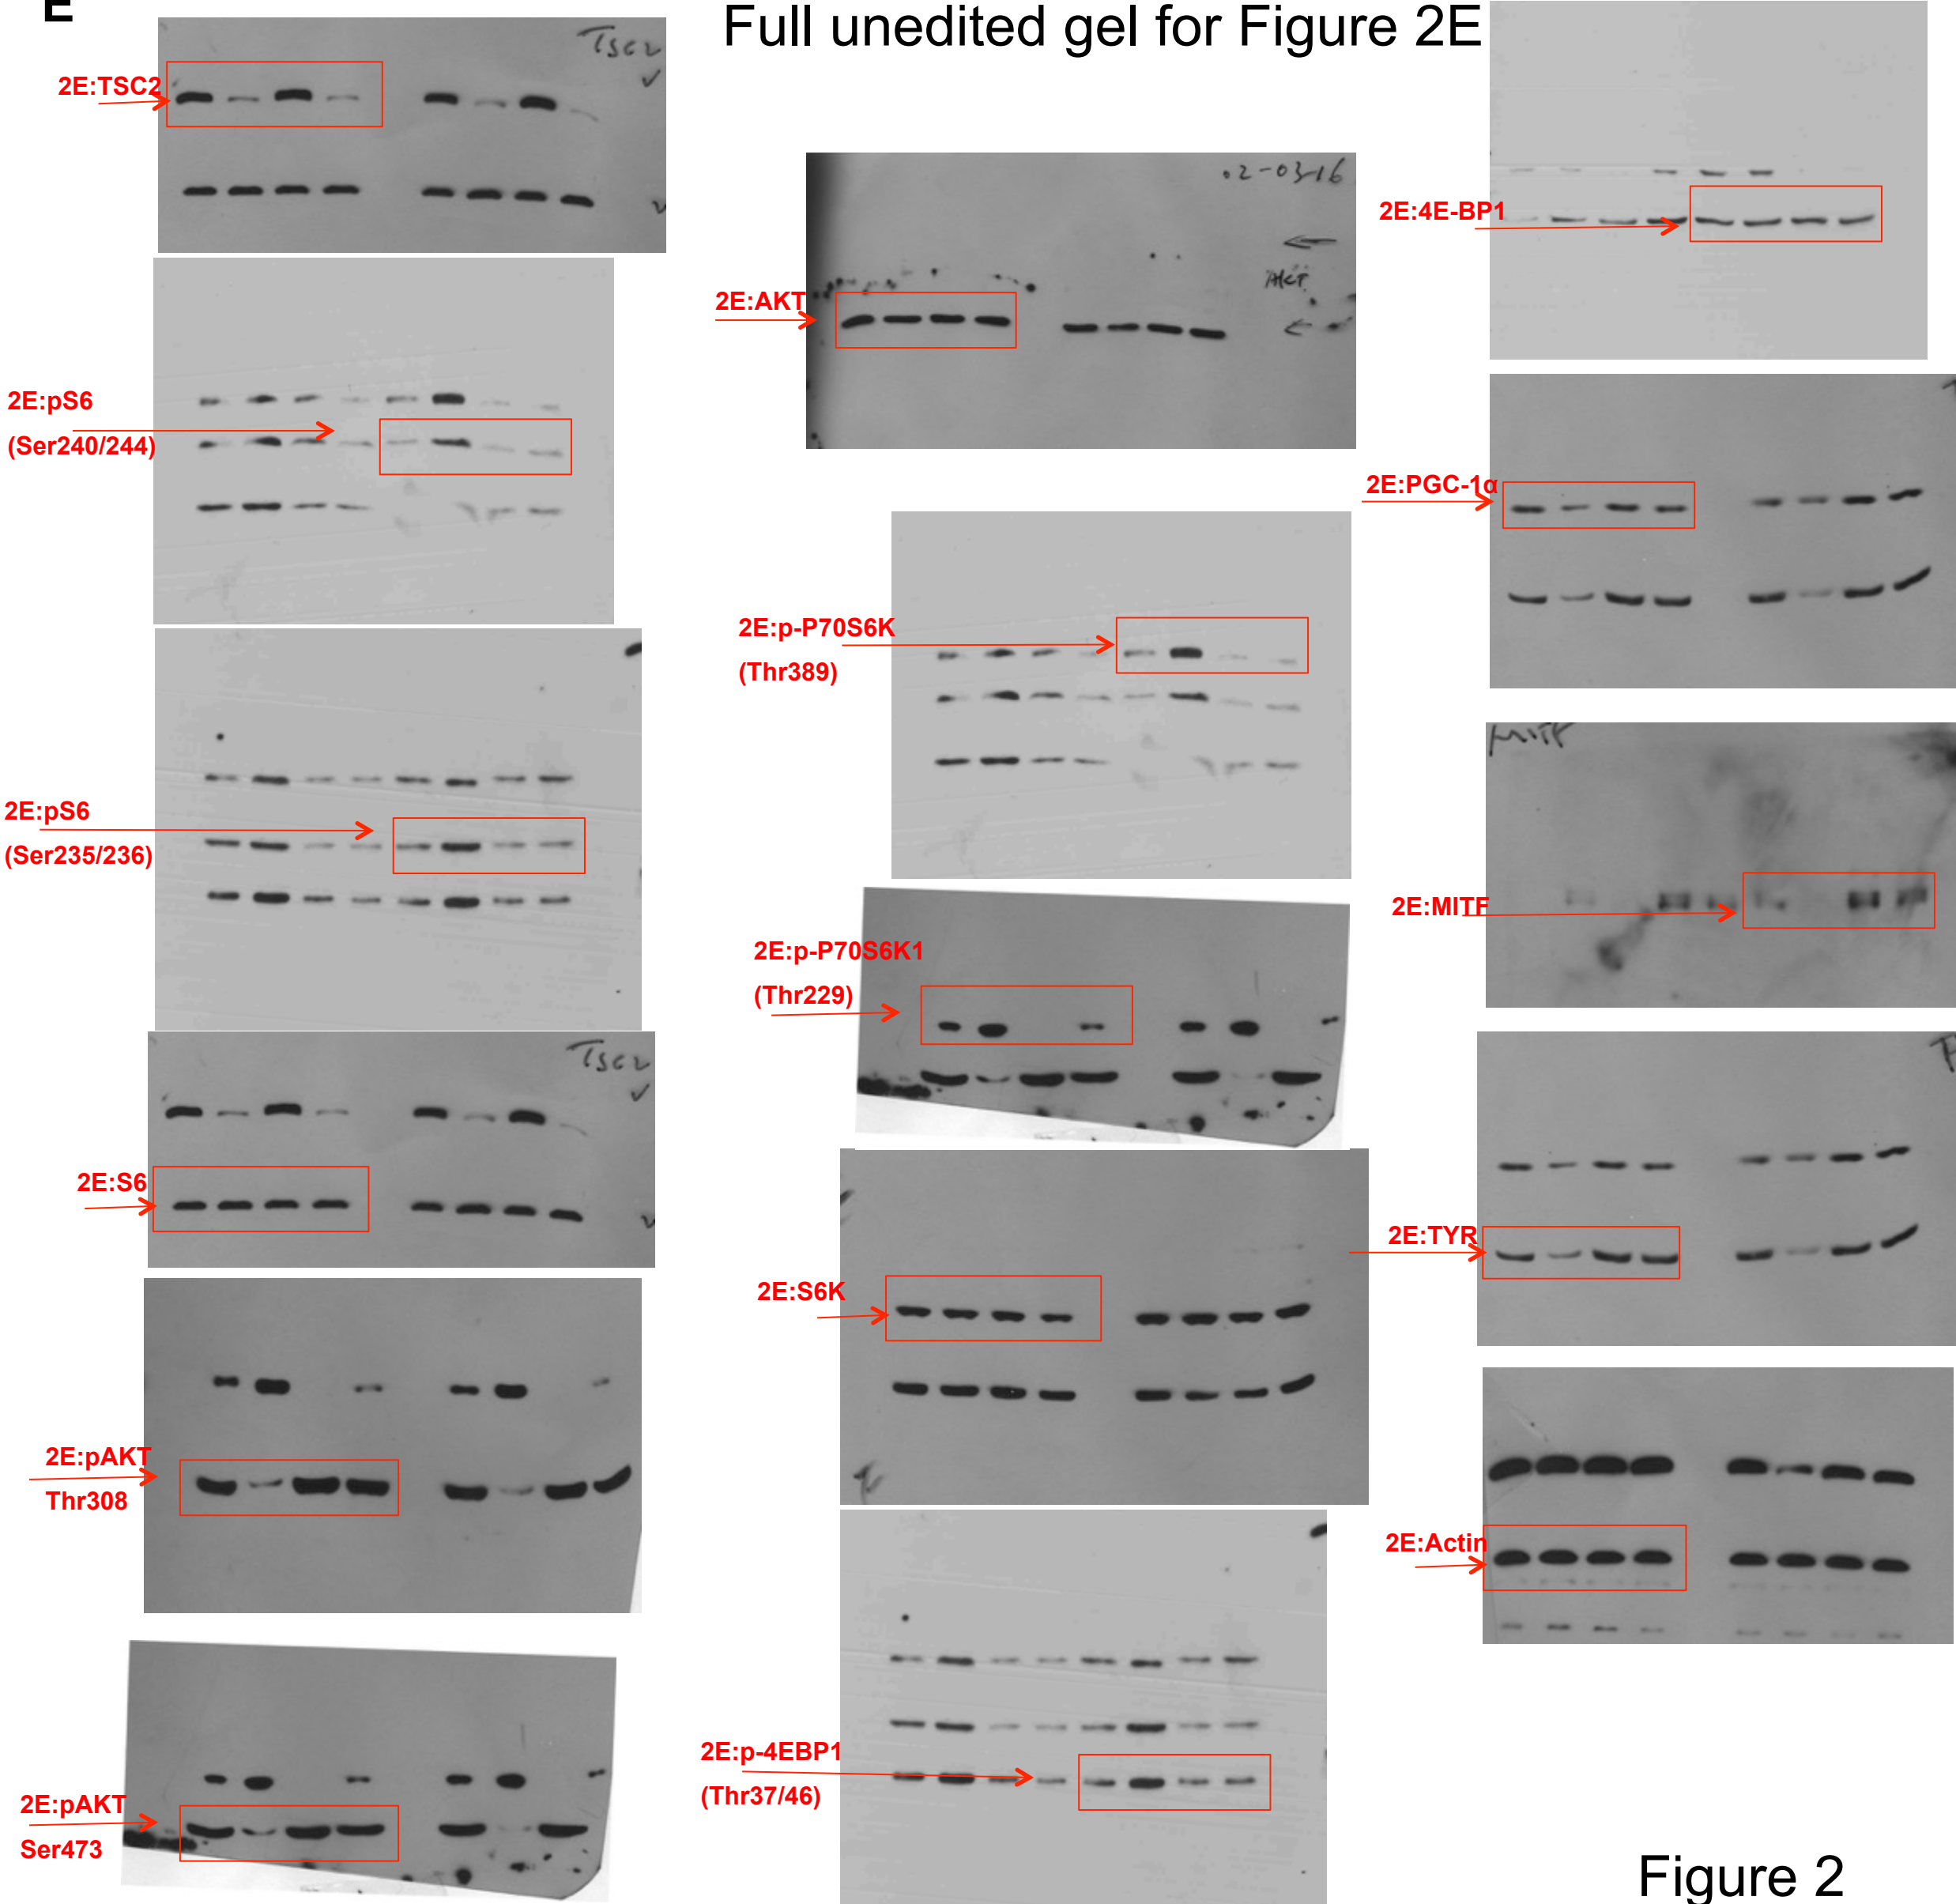

## Loading controls for parallel gels in figure 2E

parallel gel 1

2E:

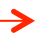

No extra loading control needed



# Full unedited gel for Figure 2I

I

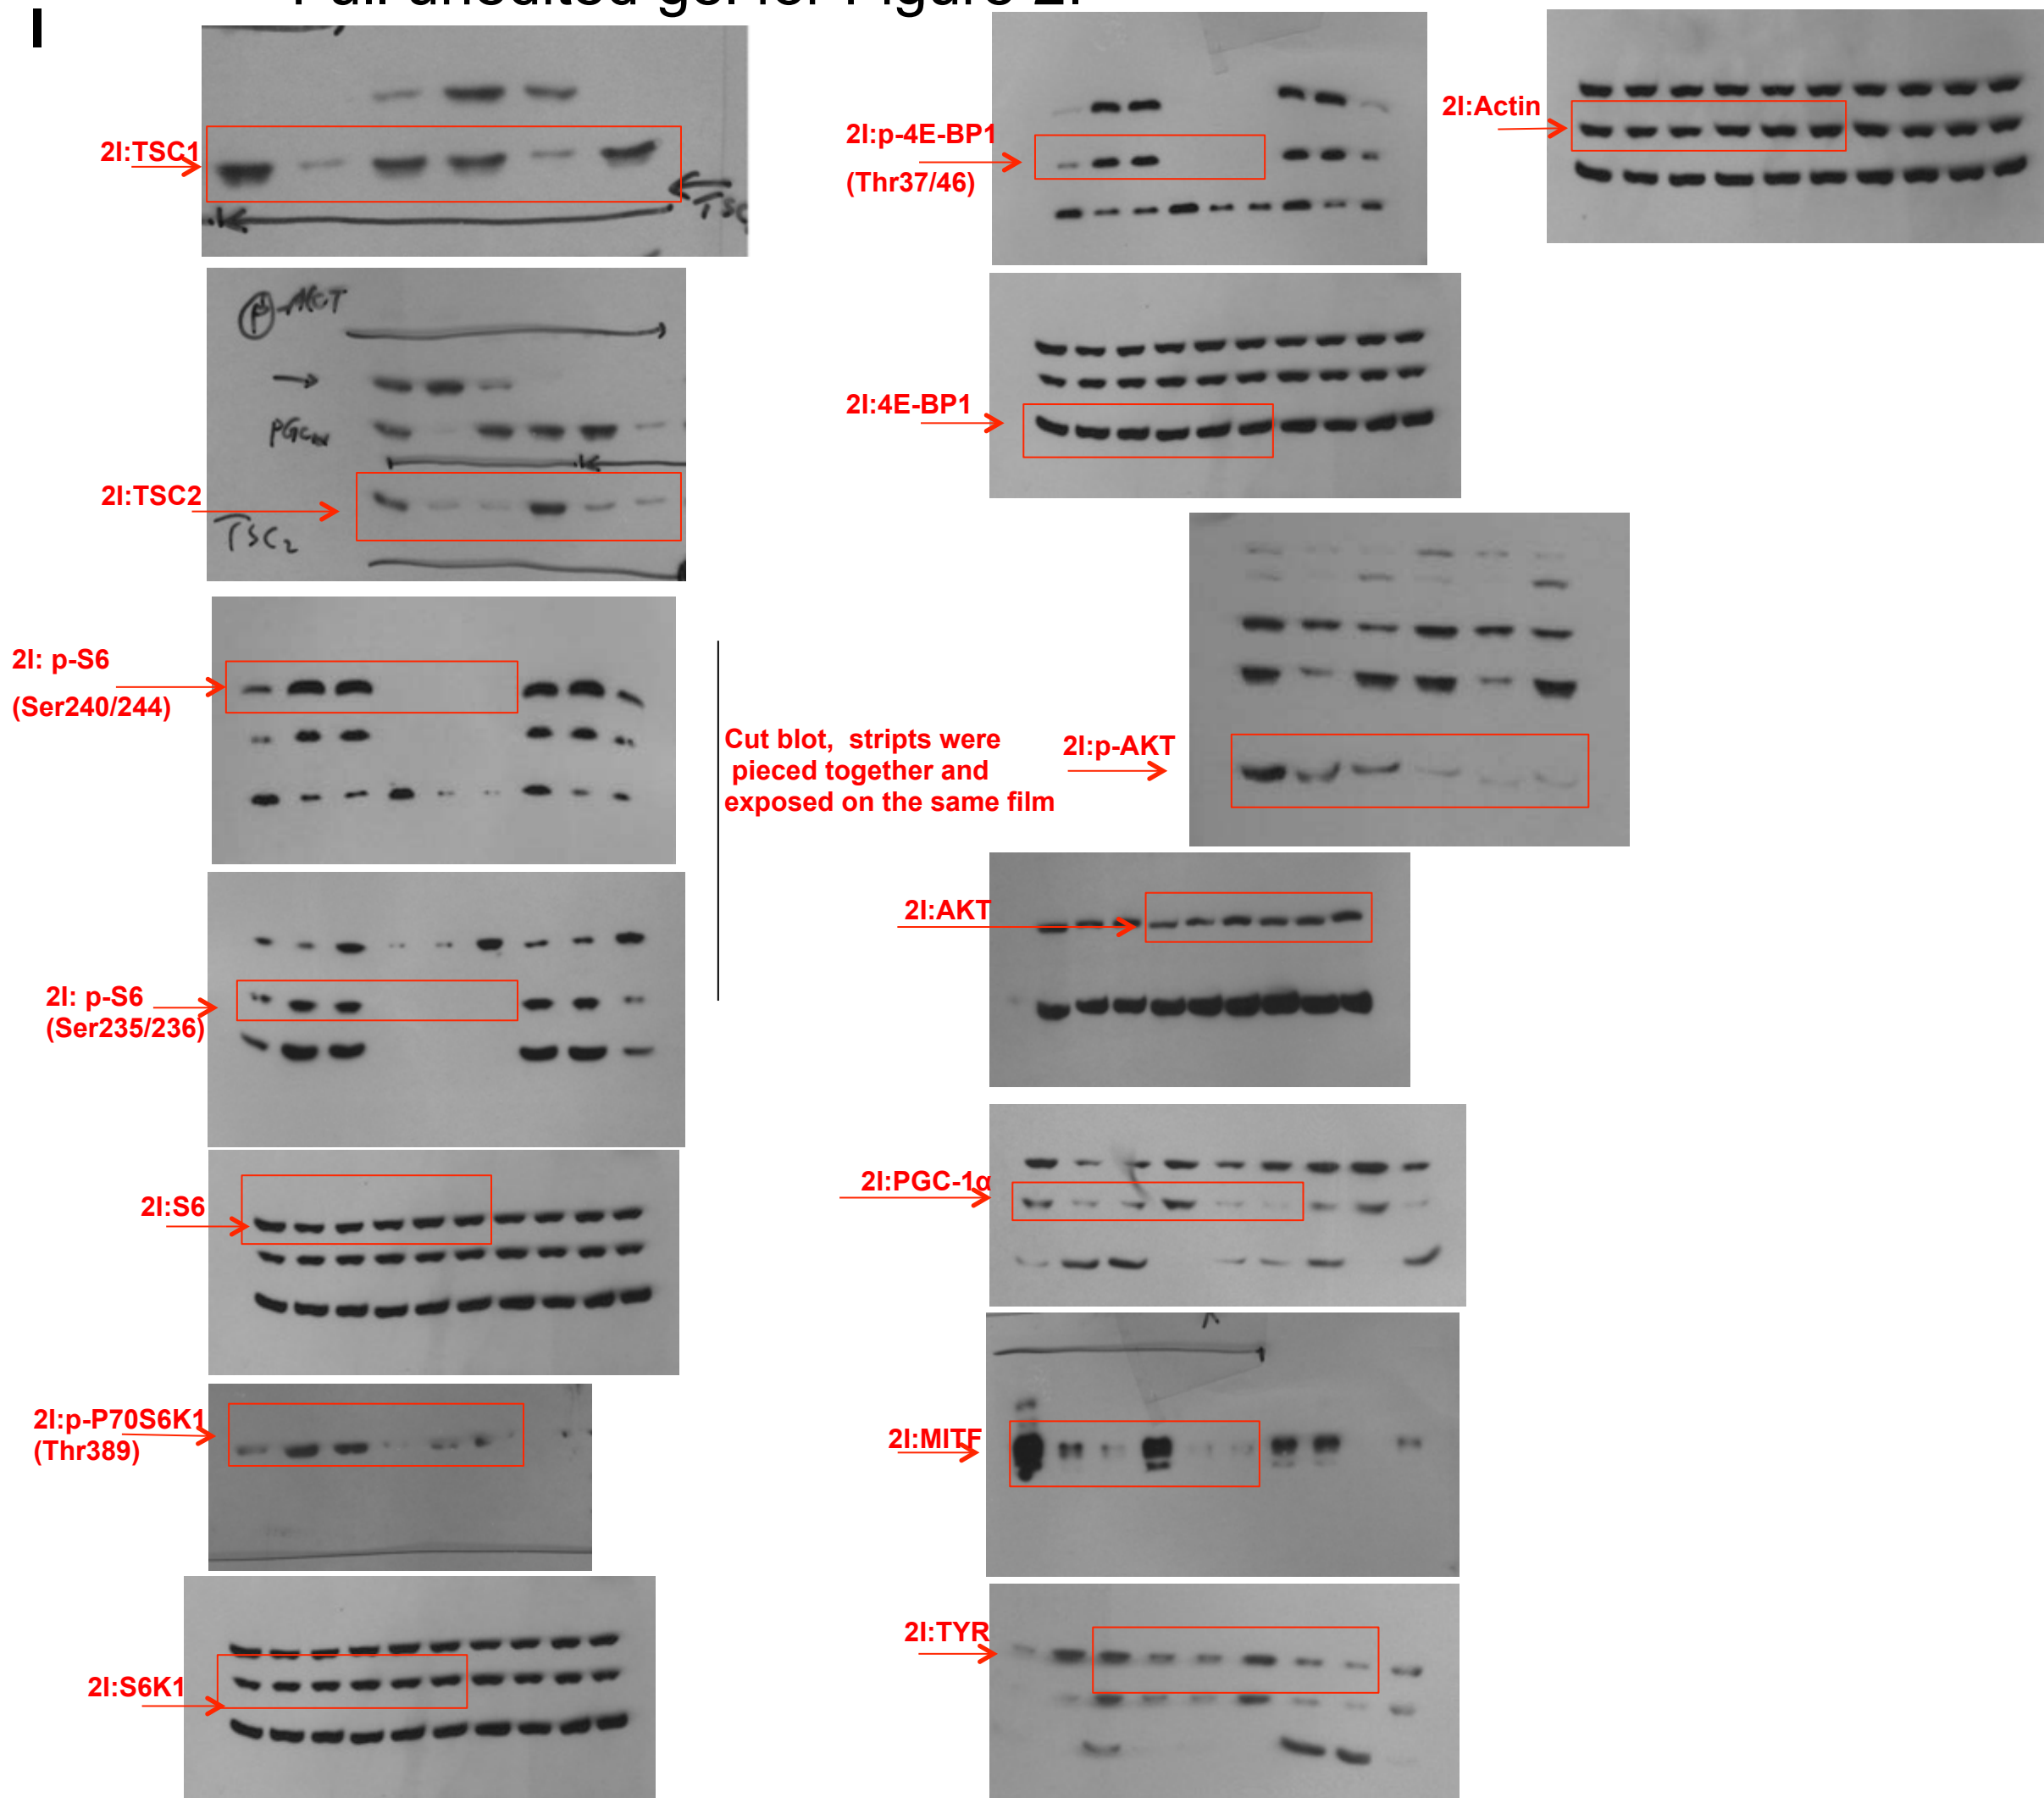

Figure 2

# Loading controls for parallel gels in figure 2I

Parallel gel 1

2I:Actin

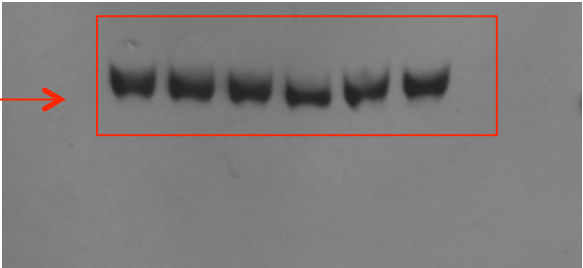

Parallel gel 2

2I:Actin

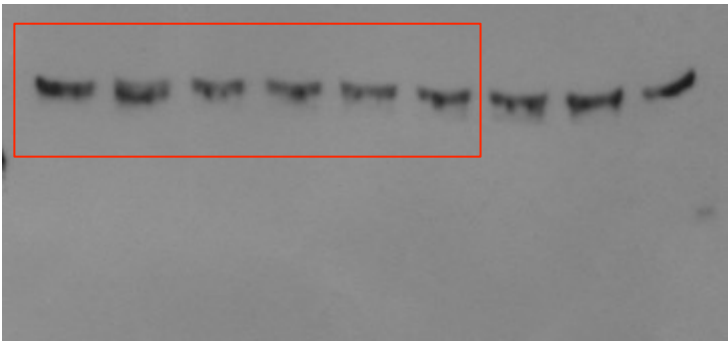

Parallel gel 3

2I

No extra loading control needed

Parallel gel 4

2I:Actin

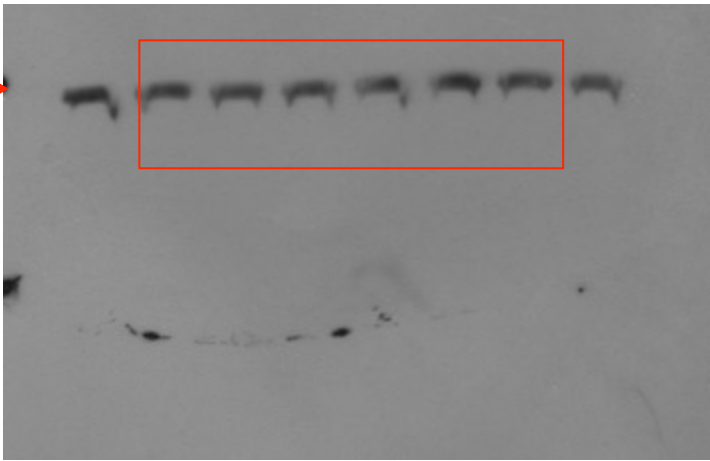

Full unedited gel for Figure 2M

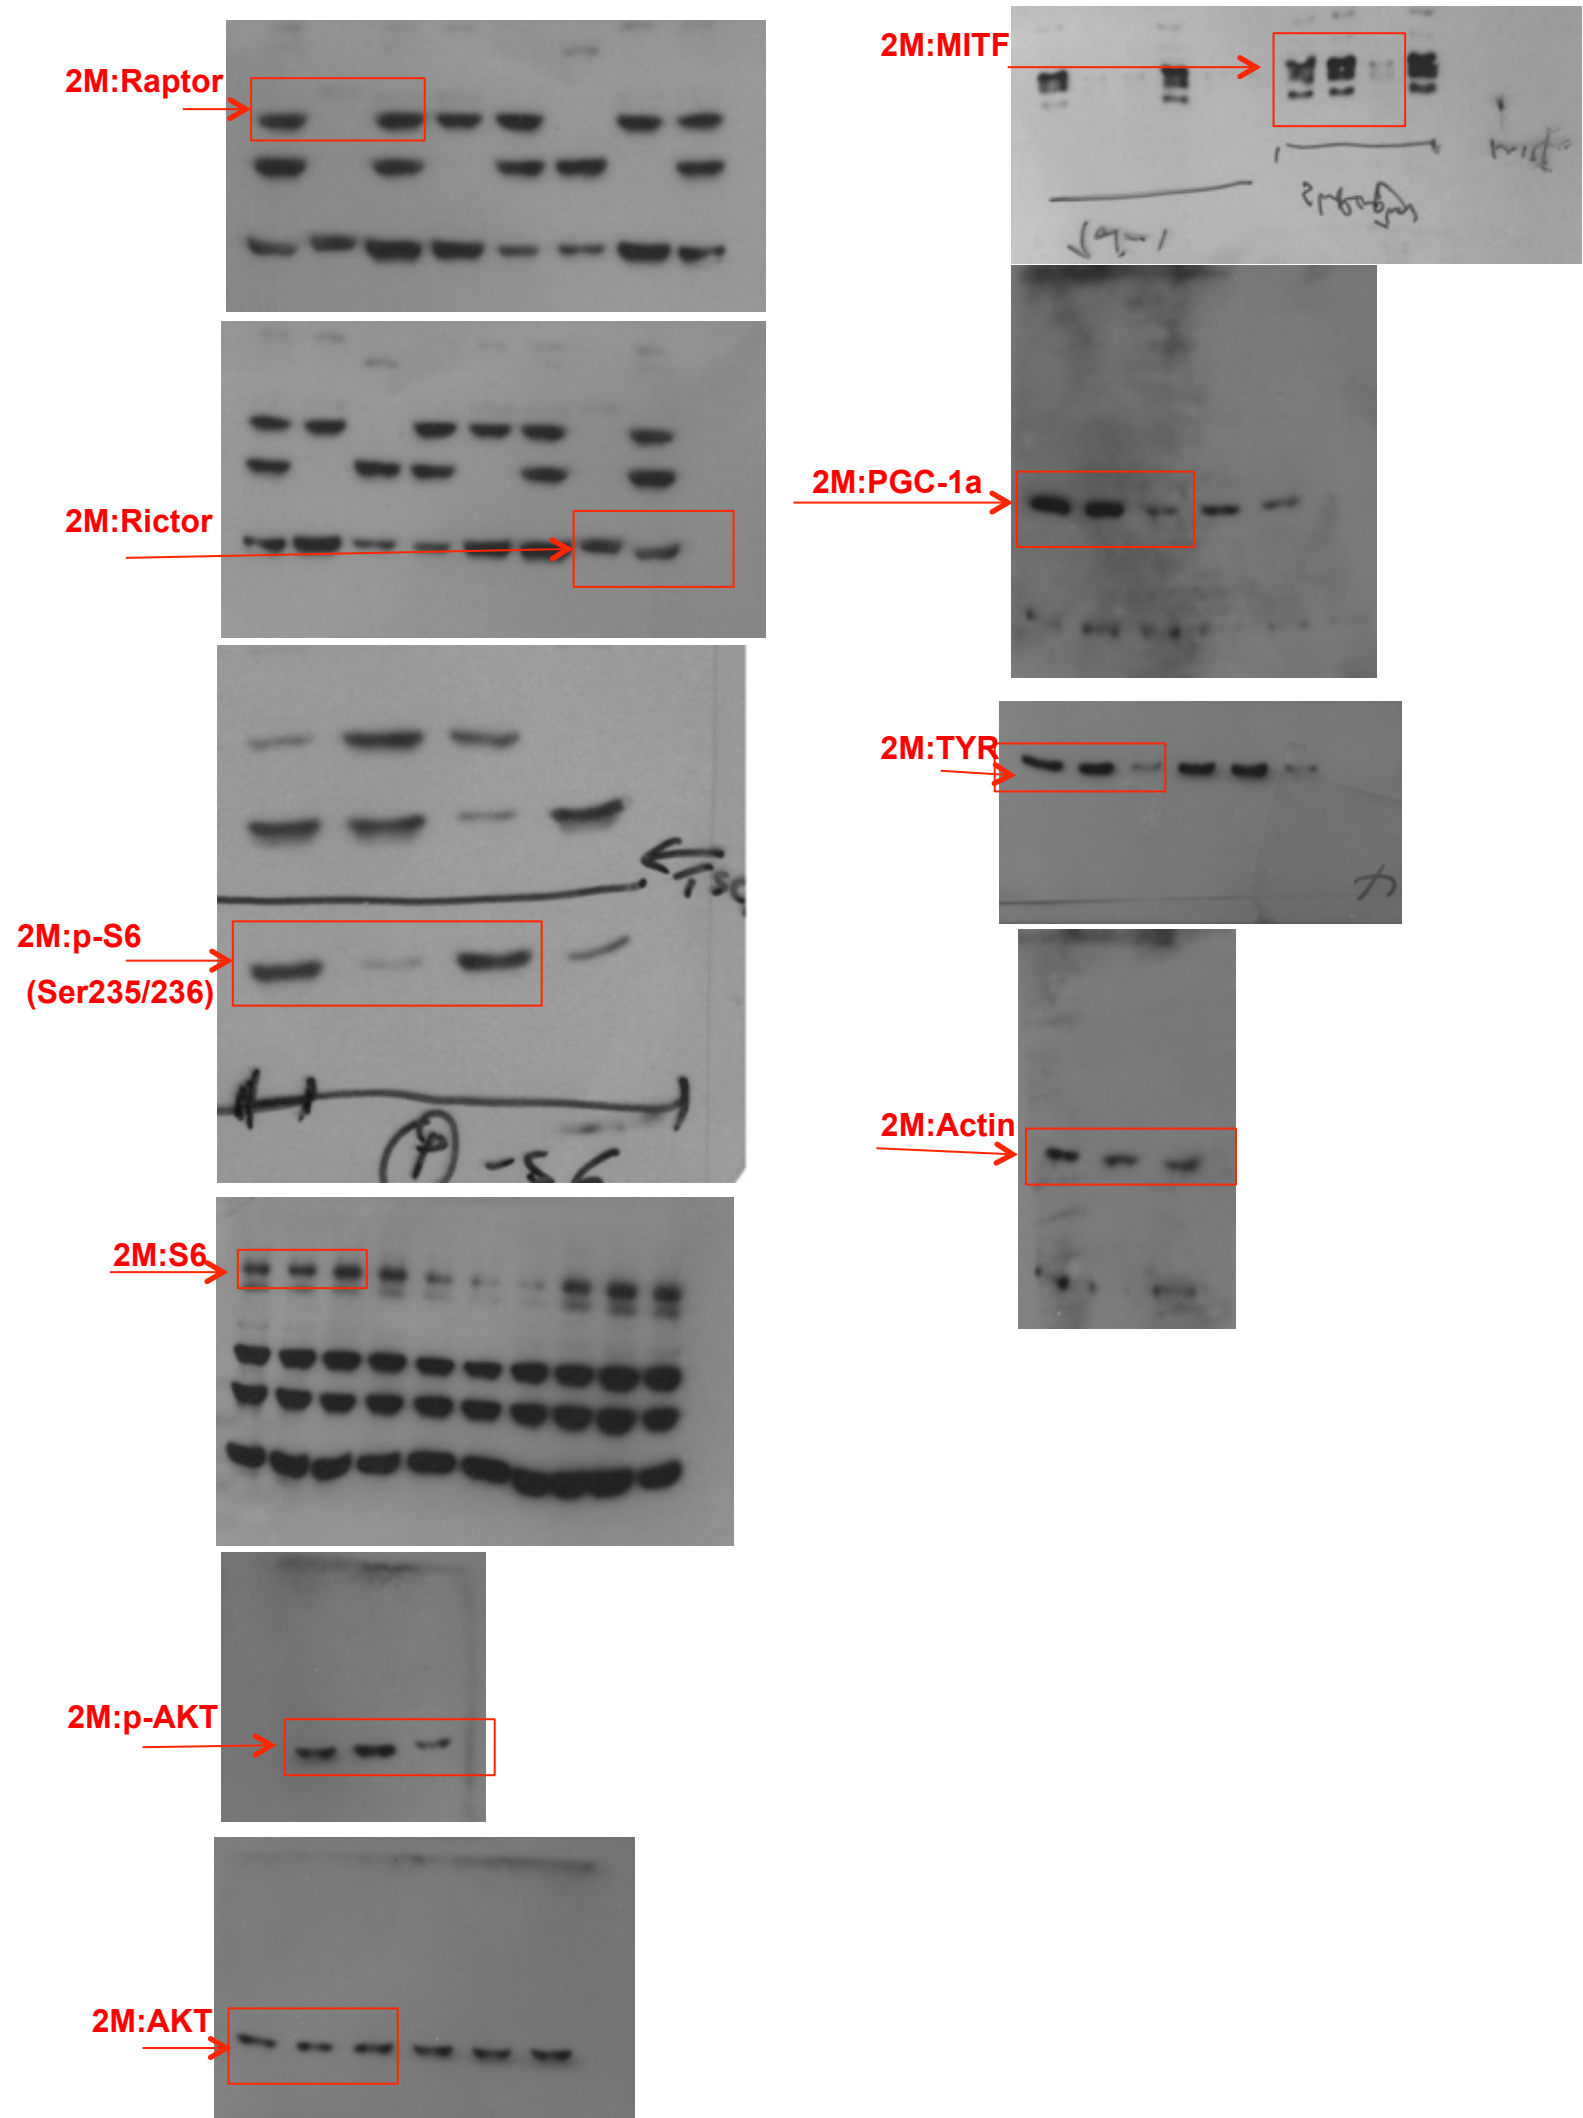

Figure 2



# Loading controls for parallel gels in figure 2M

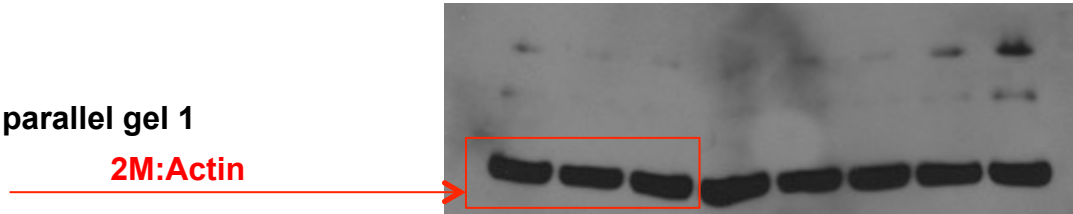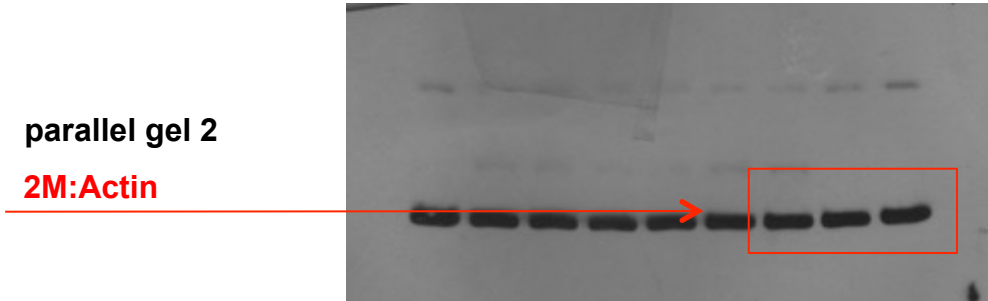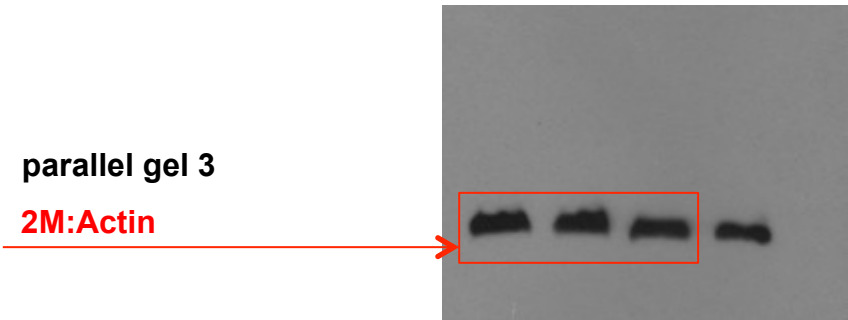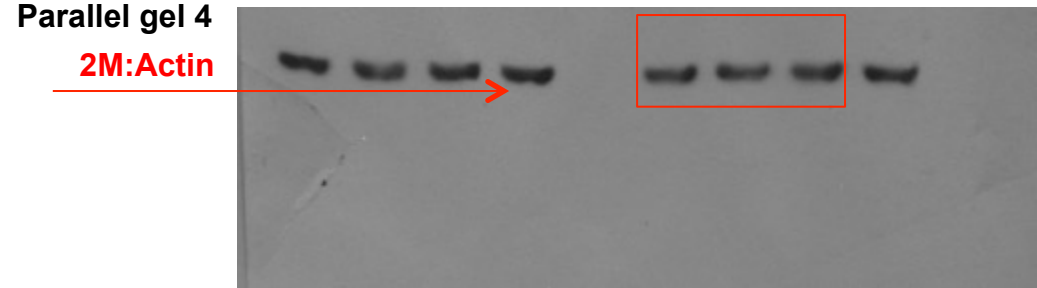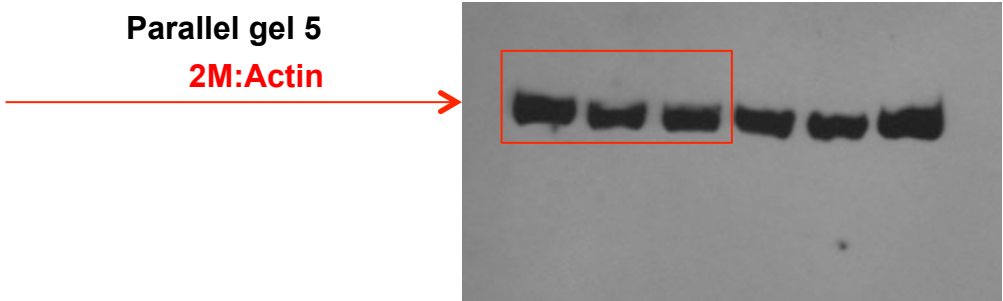



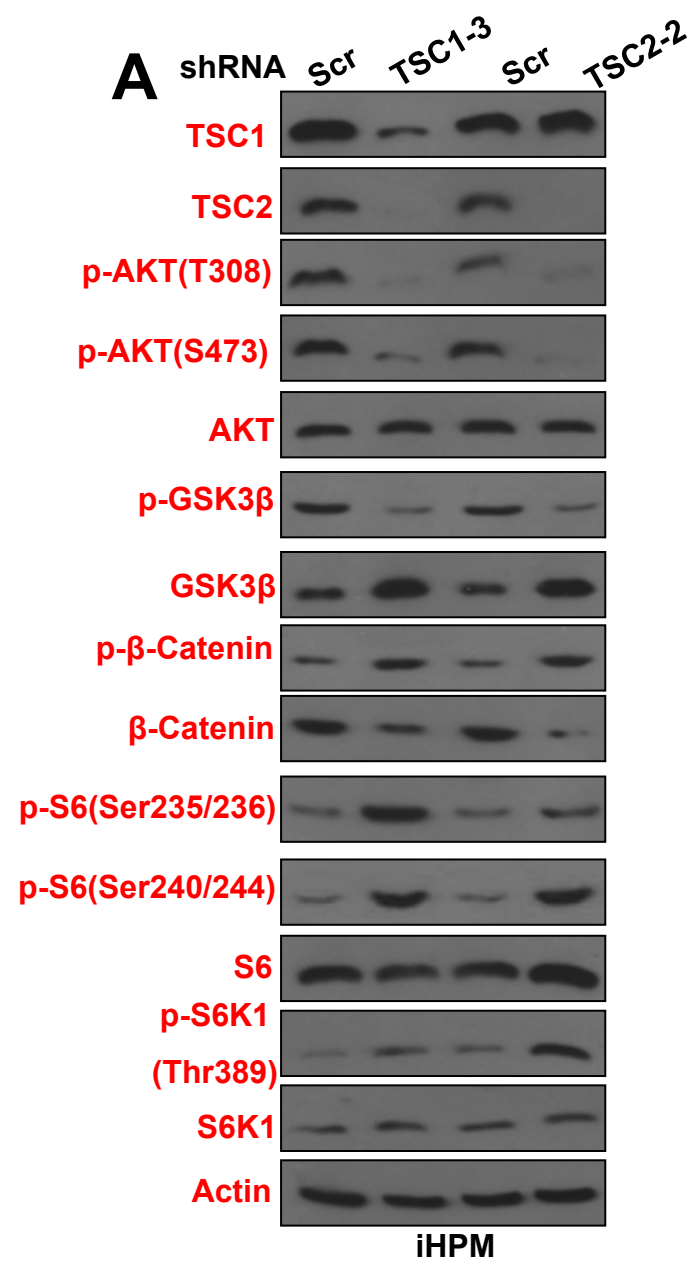

TSC1 TSC2 p-AKT(T308) AKT p-GSK3β p-β-Catenin p-S6(Ser235/236) Actin

Run on same gel, **Actin** in the figure was used as the loading control

Parelle gel 1

p-AKT(S473) GSK3β β-Catenin p-S6(Ser240/244) S6 p-S6K1 (Thr389) S6K1

Run on same gel, **S6** in the figure was used as the loading control

No extra loading control needed

Figure 3

**A** Full unedited gel for Figure 3A

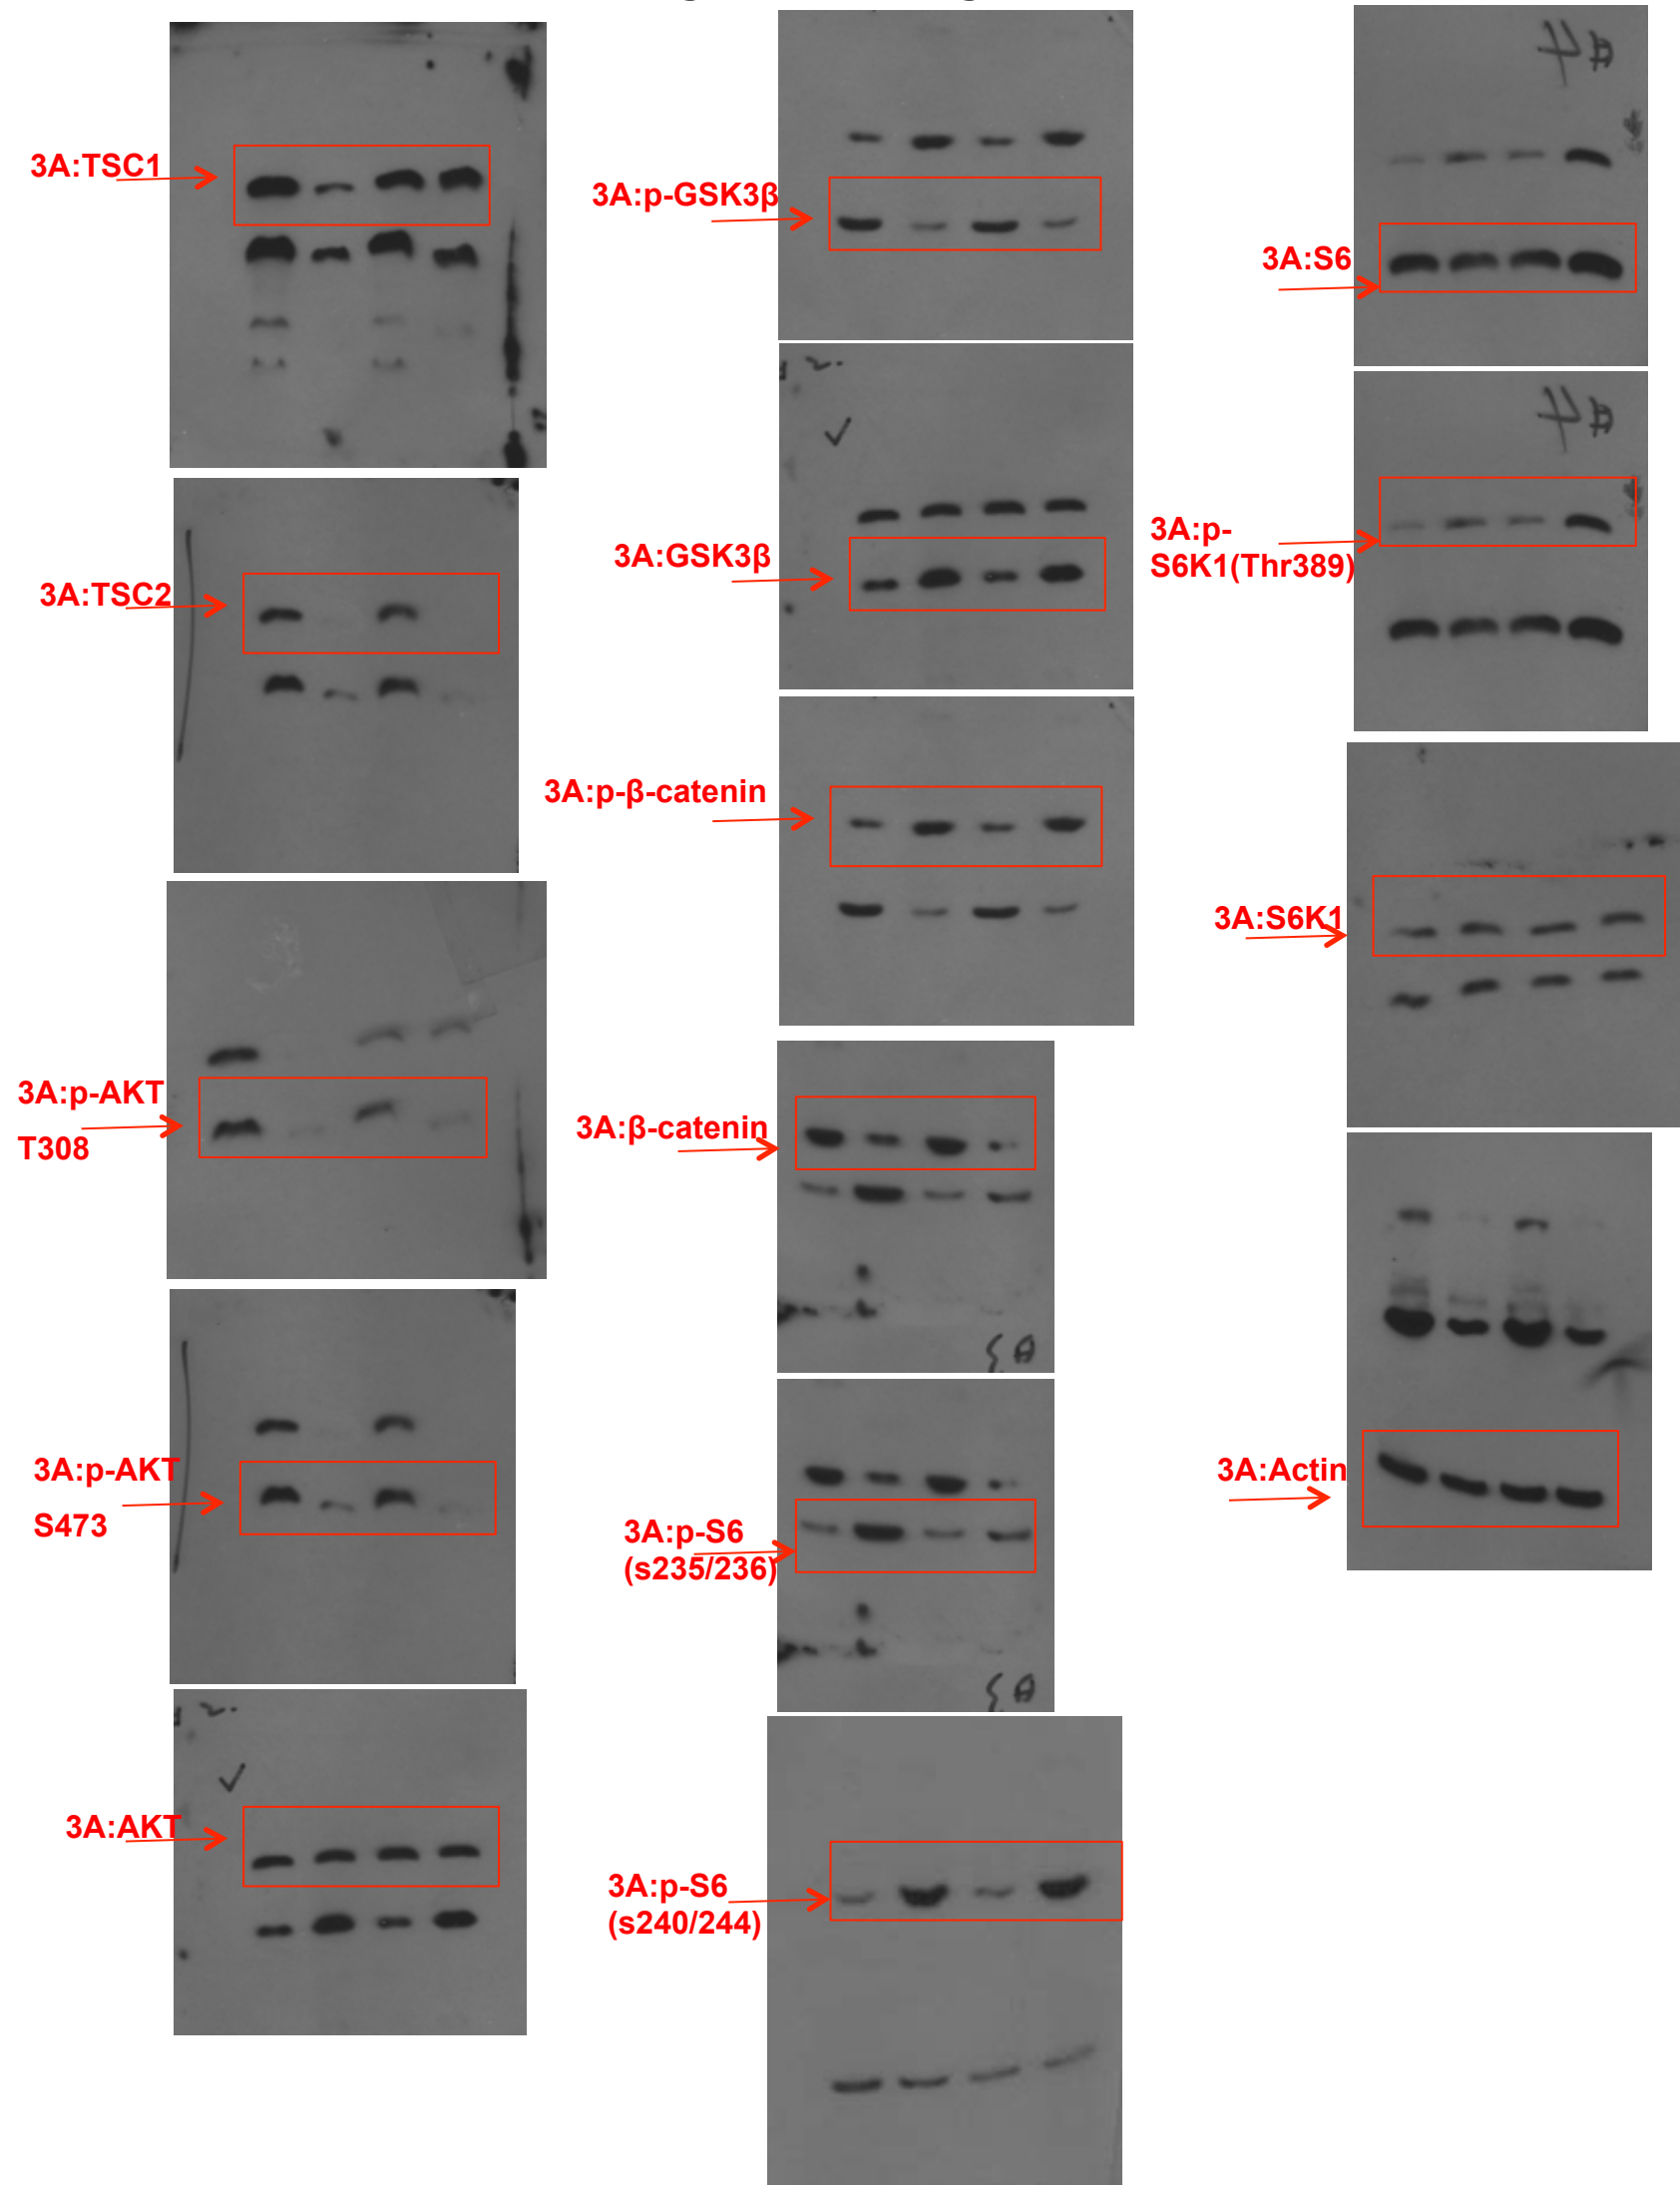

**Figure 3**

## Loading controls for parallel gels in figure 3A

Parallel gel 1

3A

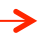

No extra loading control needed

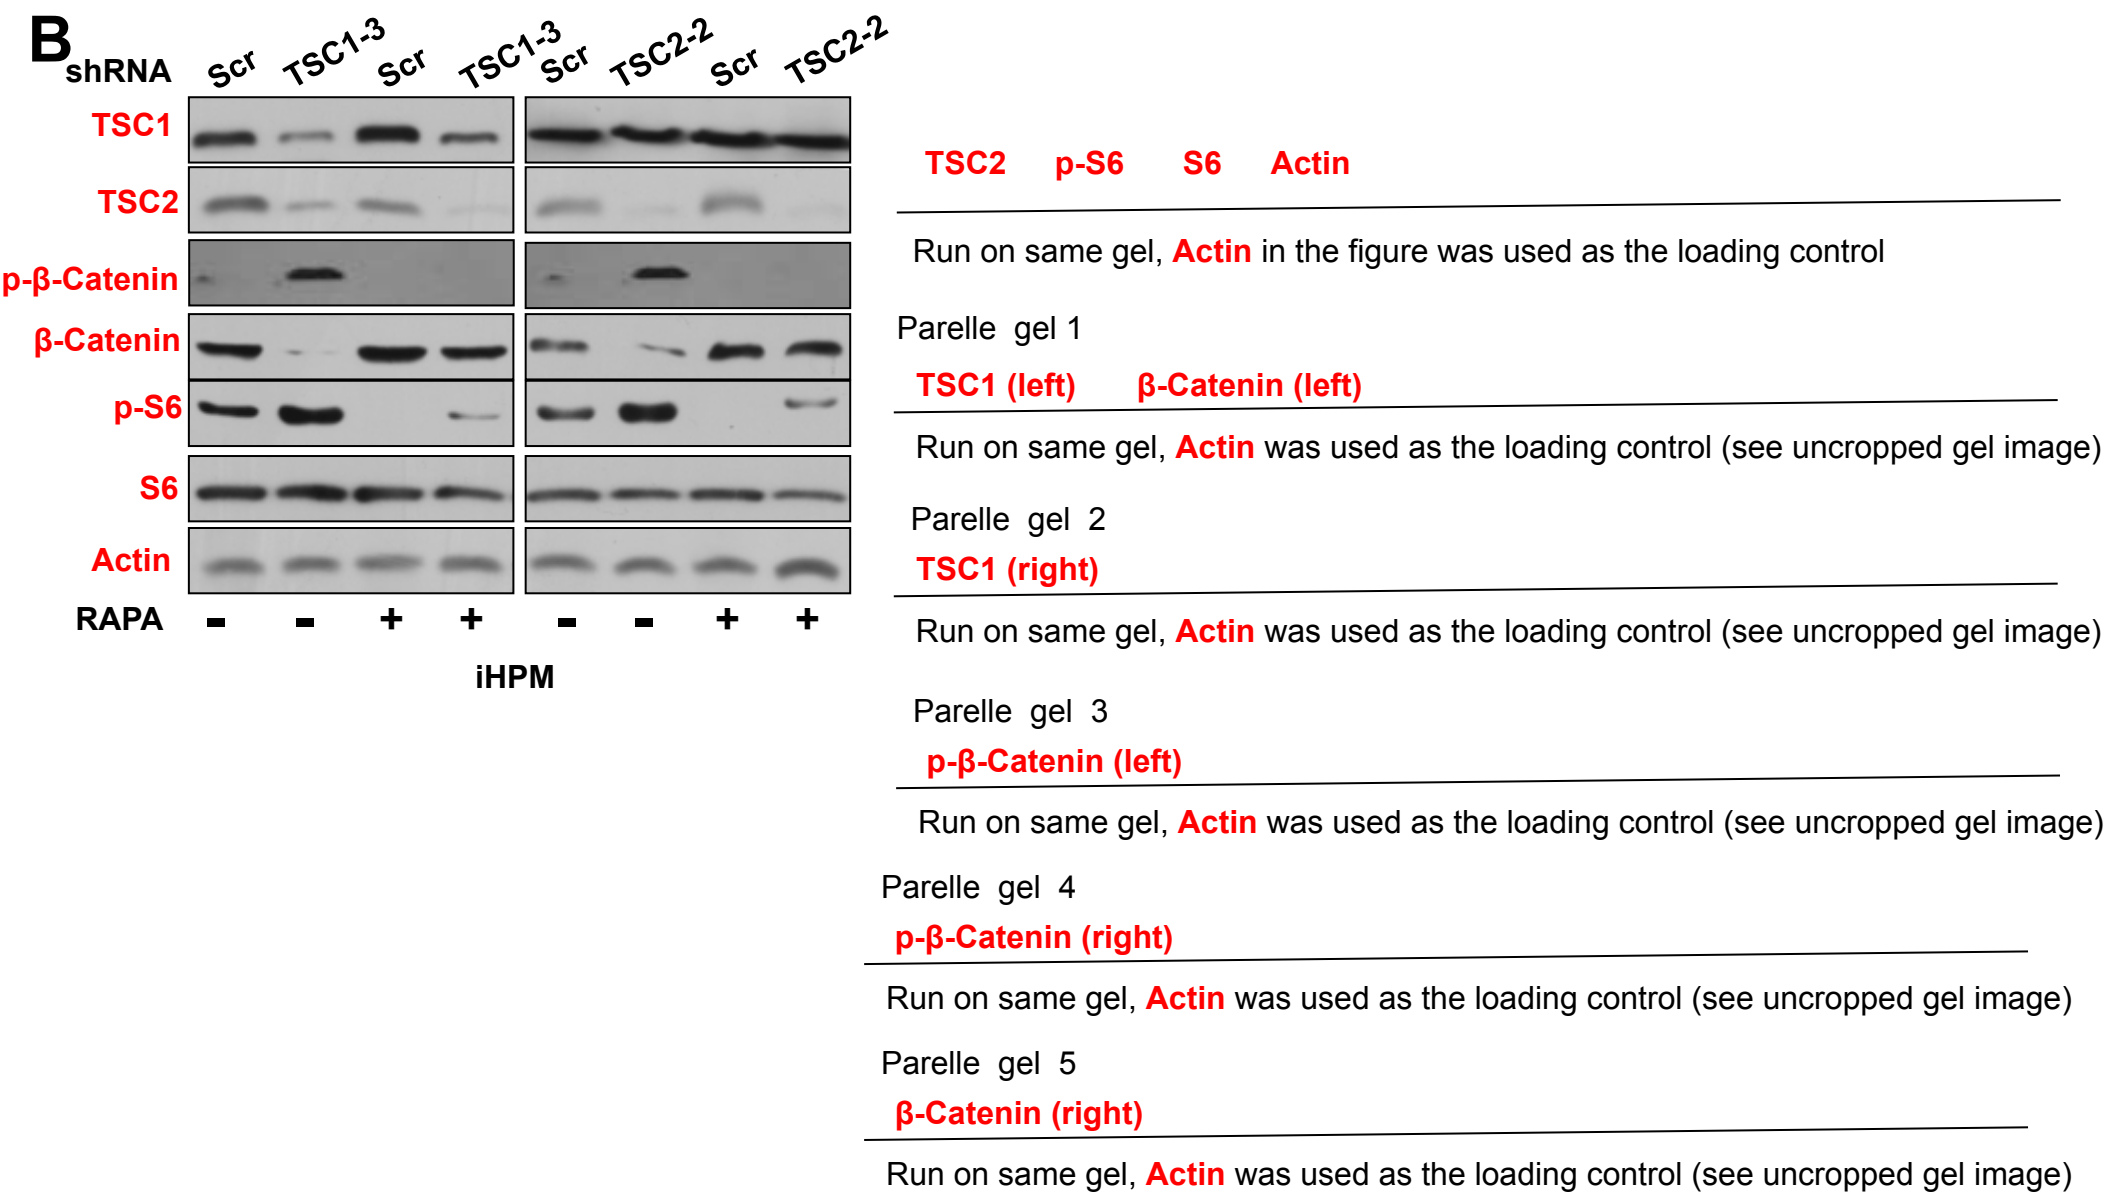

**Figure 3**

# Full unedited gel for Figure 3B

**B**

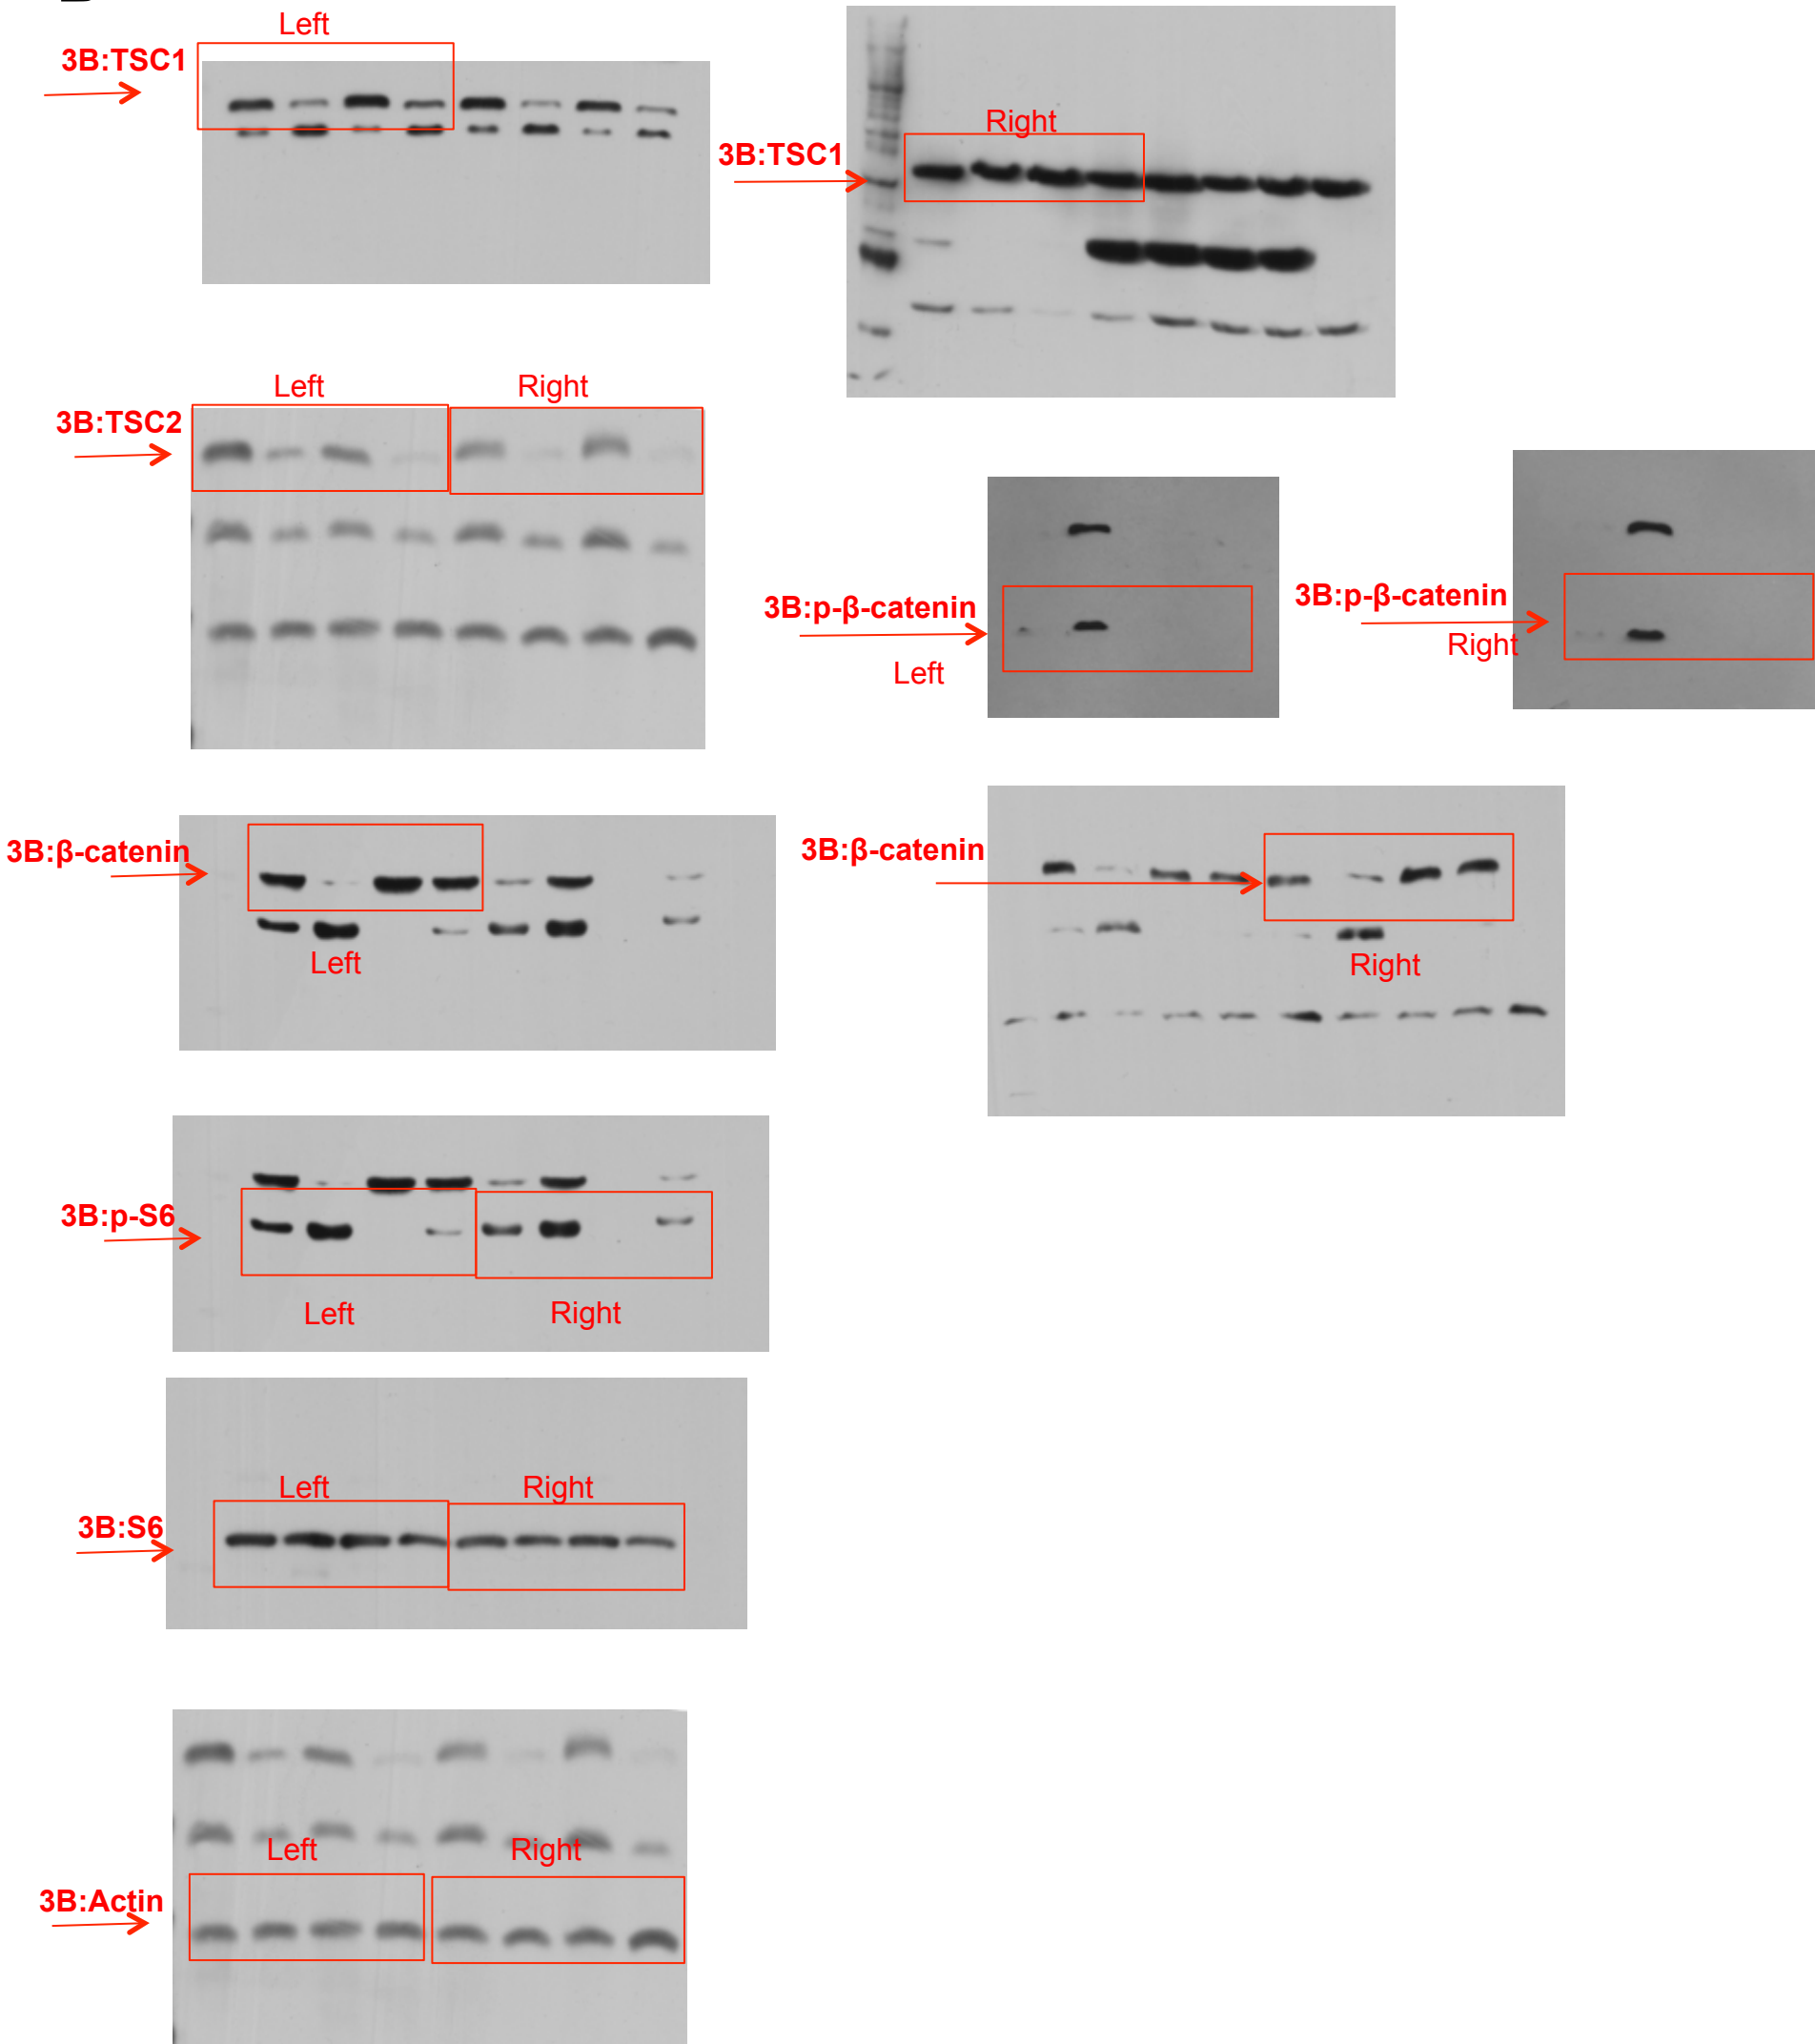

**Figure 3**

# Loading controls for parallel gels in figure 3B

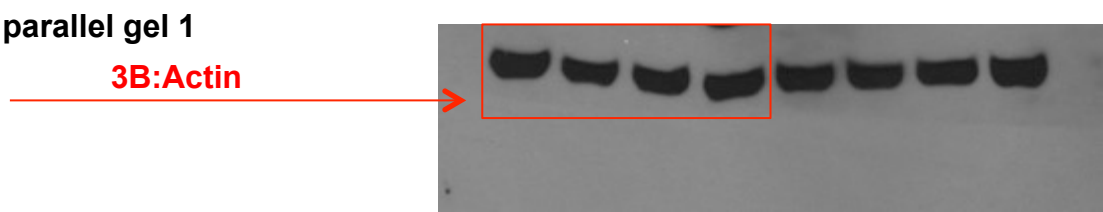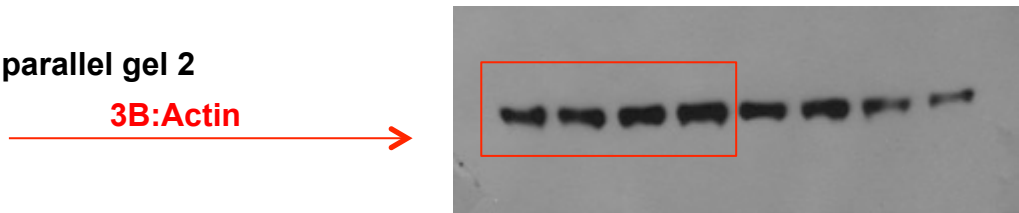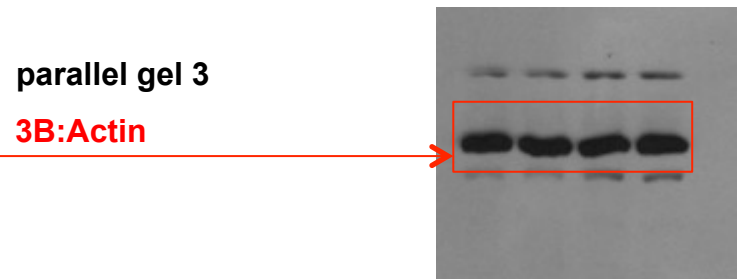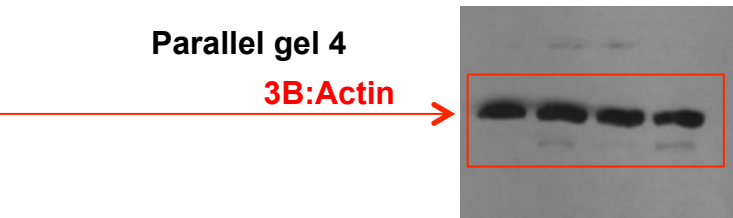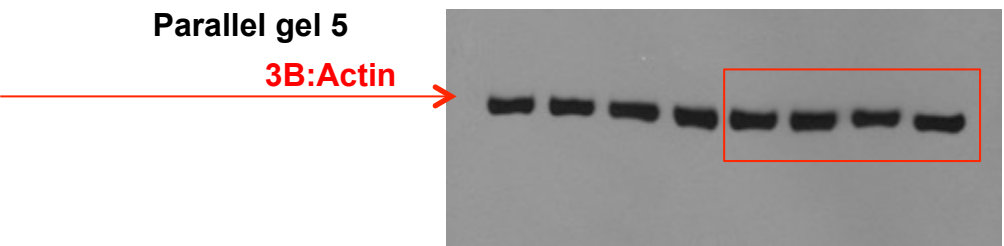

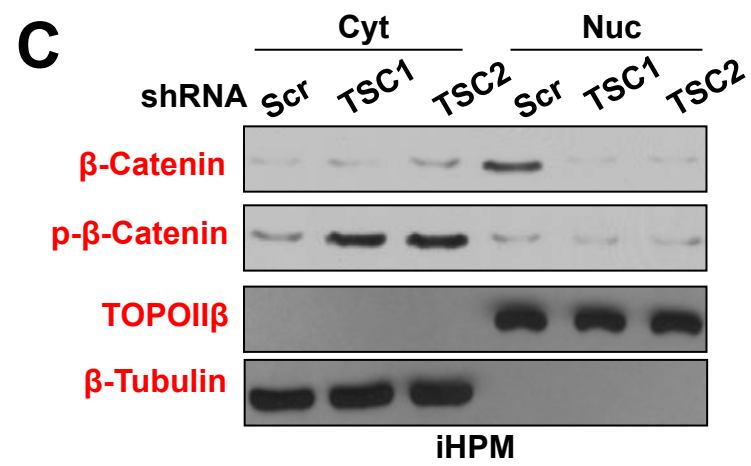

No extra loading needed

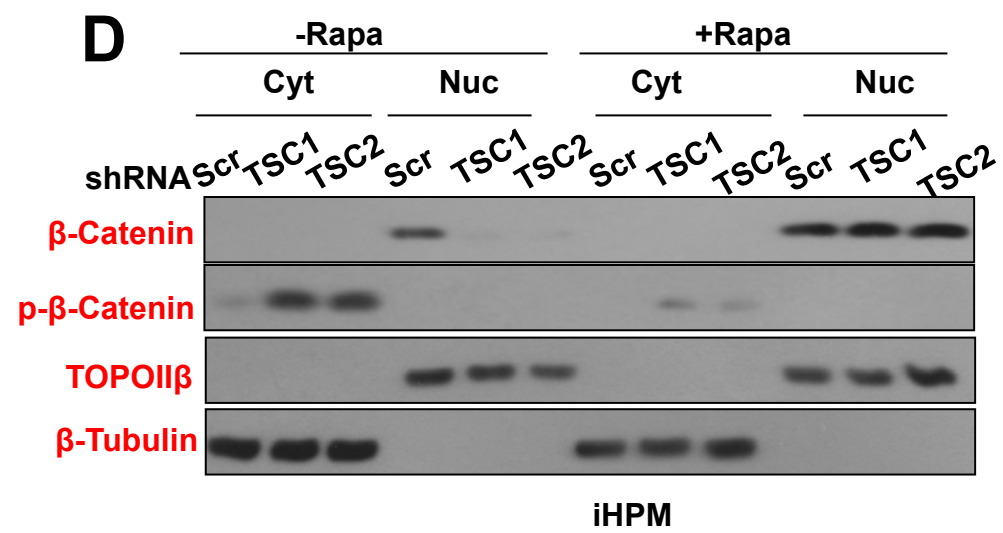

No extra loading needed

Figure 3

C

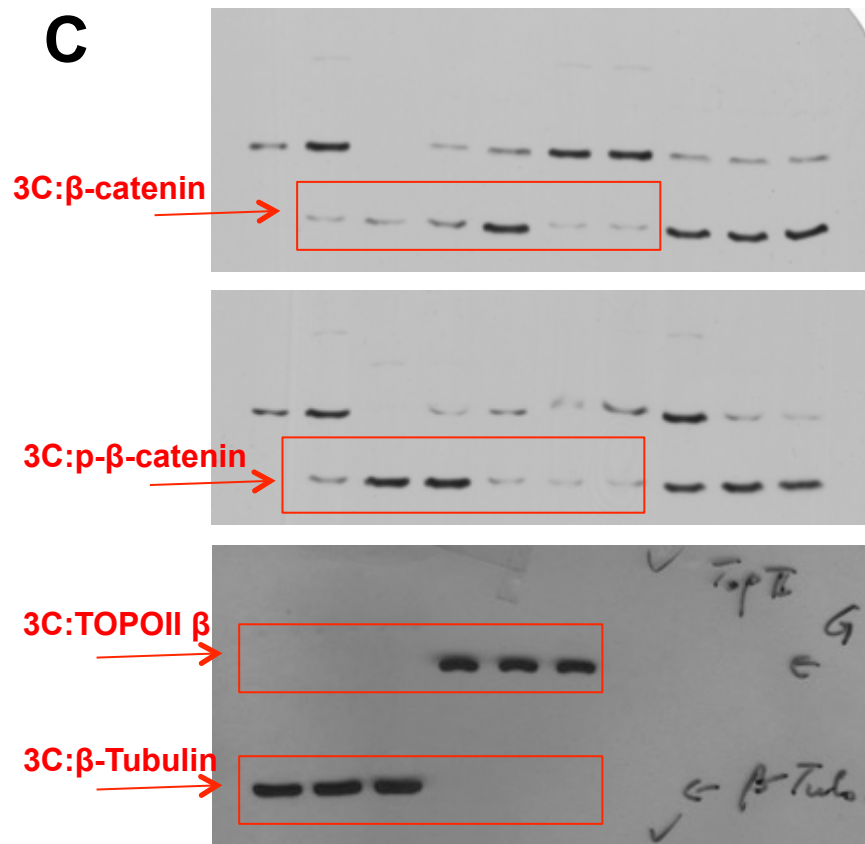

Full unedited gel for Figure 3C&D

D

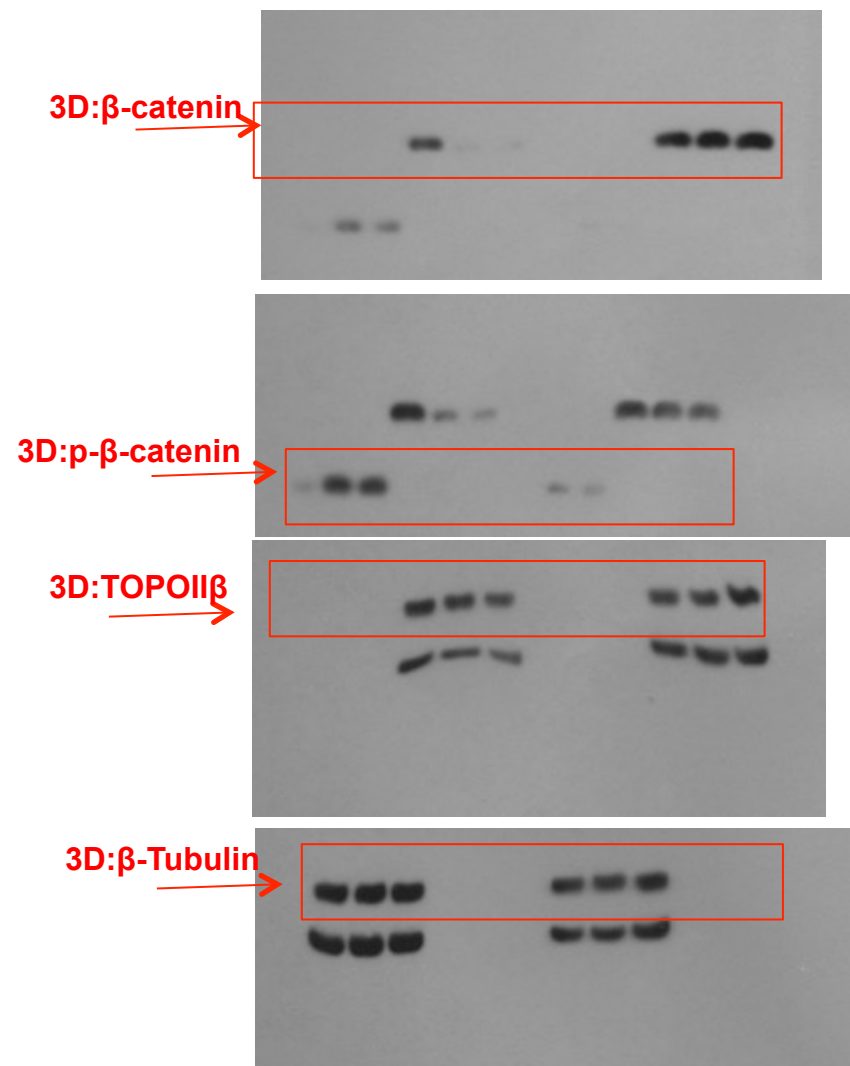

Figure 3



Loading controls for parallel gels in figure 3C&D

No extra loading control needed

**B**

EV WT CA

iHPM

Parallel gel 1

---

**MITF (left)**

---

Run on same gel, **Actin** was used as the loading control (see uncropped gel image)

Parallel gel 2

---

**MITF (right)**

---

Run on same gel, **Actin** was used as the loading control (see uncropped gel image)

Parallel gel 3

---

**Flag**

---

Run on same gel, **Actin** was used as the loading control (see uncropped gel image)

### Figure 4

Full unedited gel for Figure 4AB

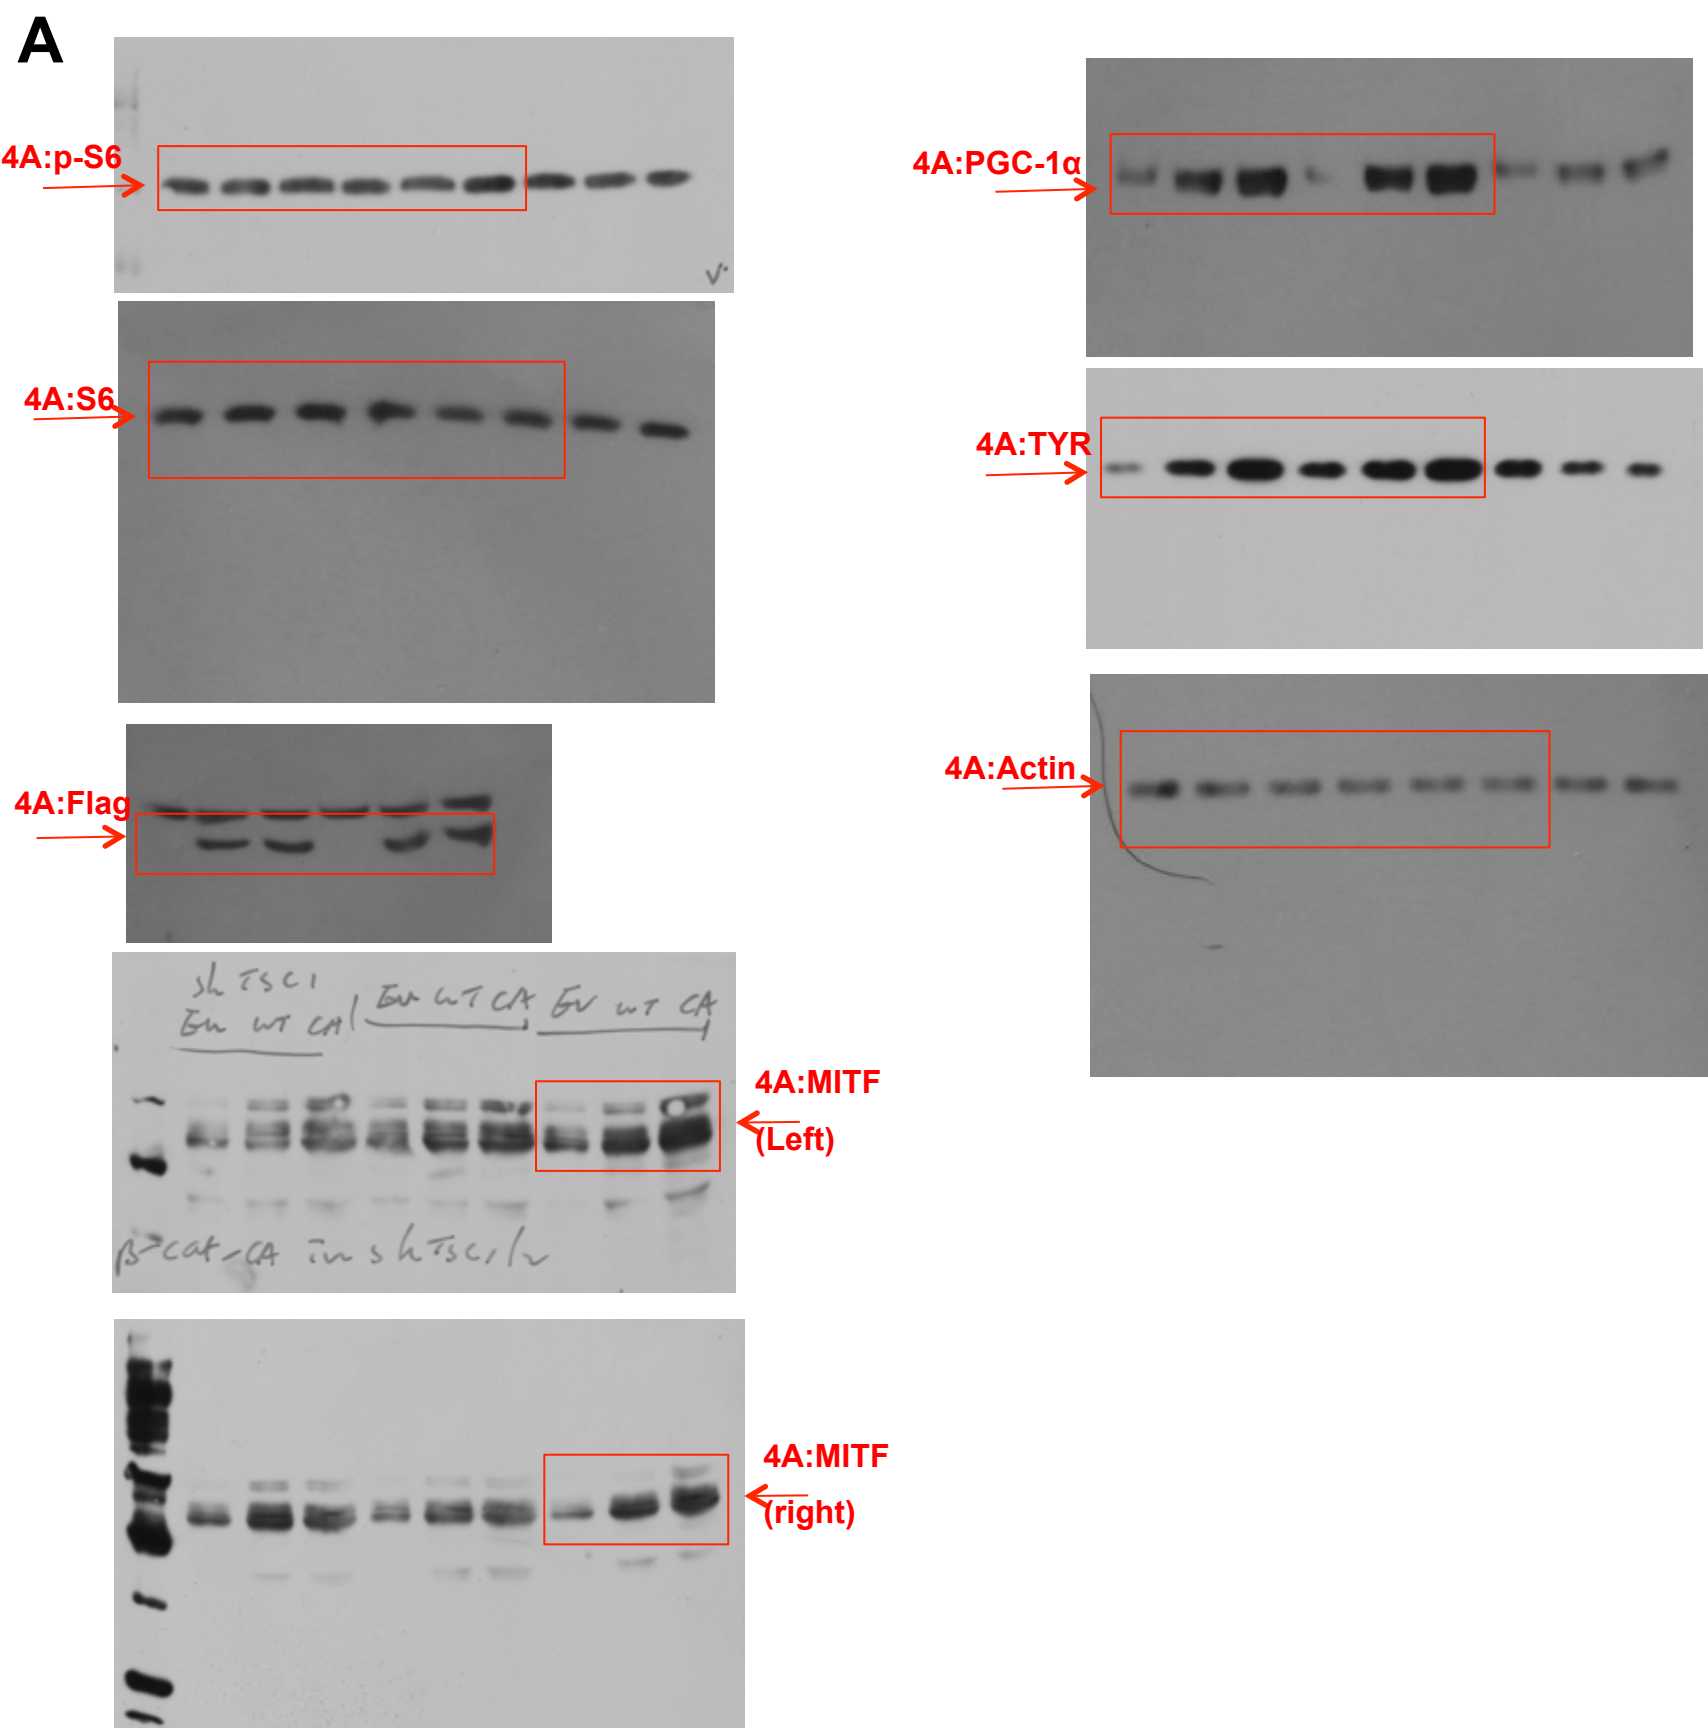

Figure 4

# Loading controls for parallel gels in figure 4AB

parallel gel 1

4A:Actin

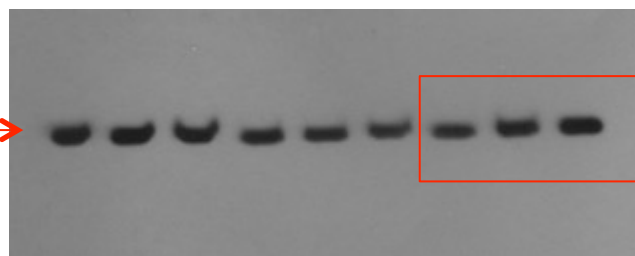

parallel gel 2

4A:Actin

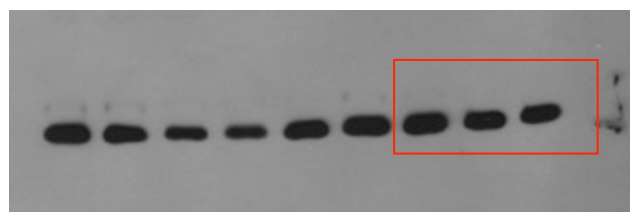

parallel gel 3

4A:Actin

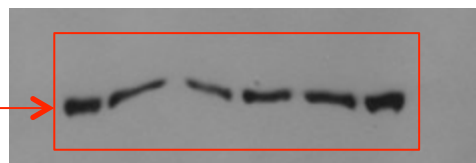

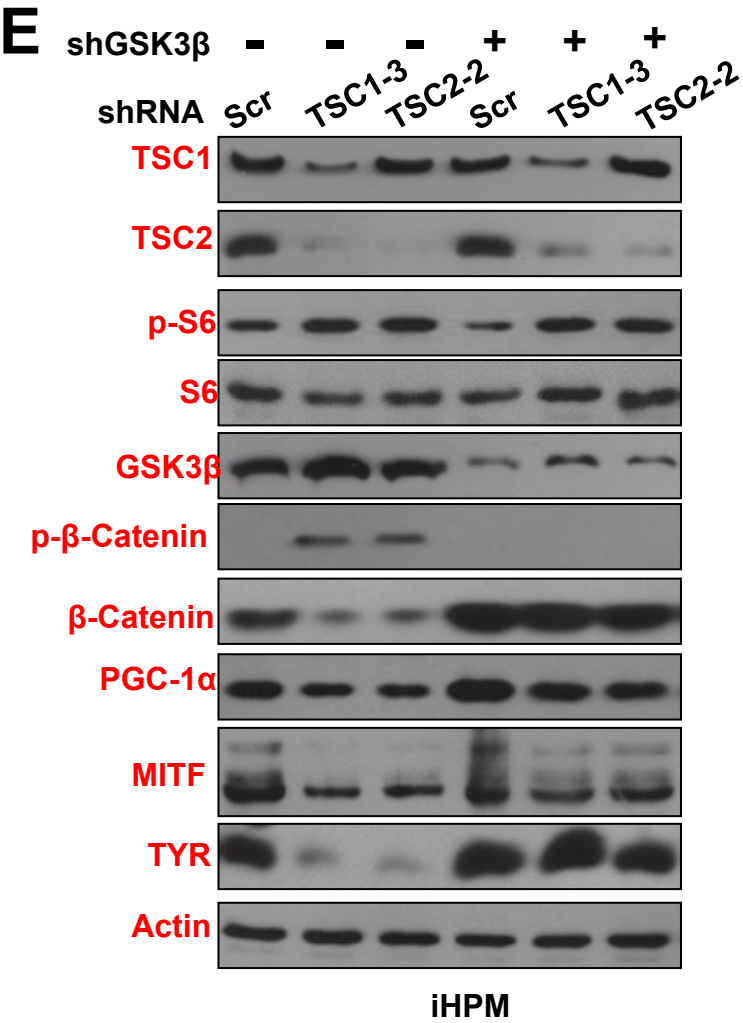

S6    Actin

Run on same gel, **Actin** in the figure was used as the loading control

Parallel gel 1

TSC1    TSC2    GSK3β    PGC-1α    MITF

Run on same gel, **Actin** was used as the loading control (see uncropped gel image)

Parallel gel 2

p-S6

Run on same gel, **Actin** was used as the loading control (see uncropped gel image)

Parallel gel 3

p-β-Catenin

Run on same gel, **Actin** was used as the loading control (see uncropped gel image)

Parallel gel 4

β-Catenin    TYR

Run on same gel, **Actin** was used as the loading control (see uncropped gel image)

Parallel gel 5

TYR

Run on same gel, **Actin** was used as the loading control (see uncropped gel image)

Figure 4

Full unedited gel for Figure 4E

E

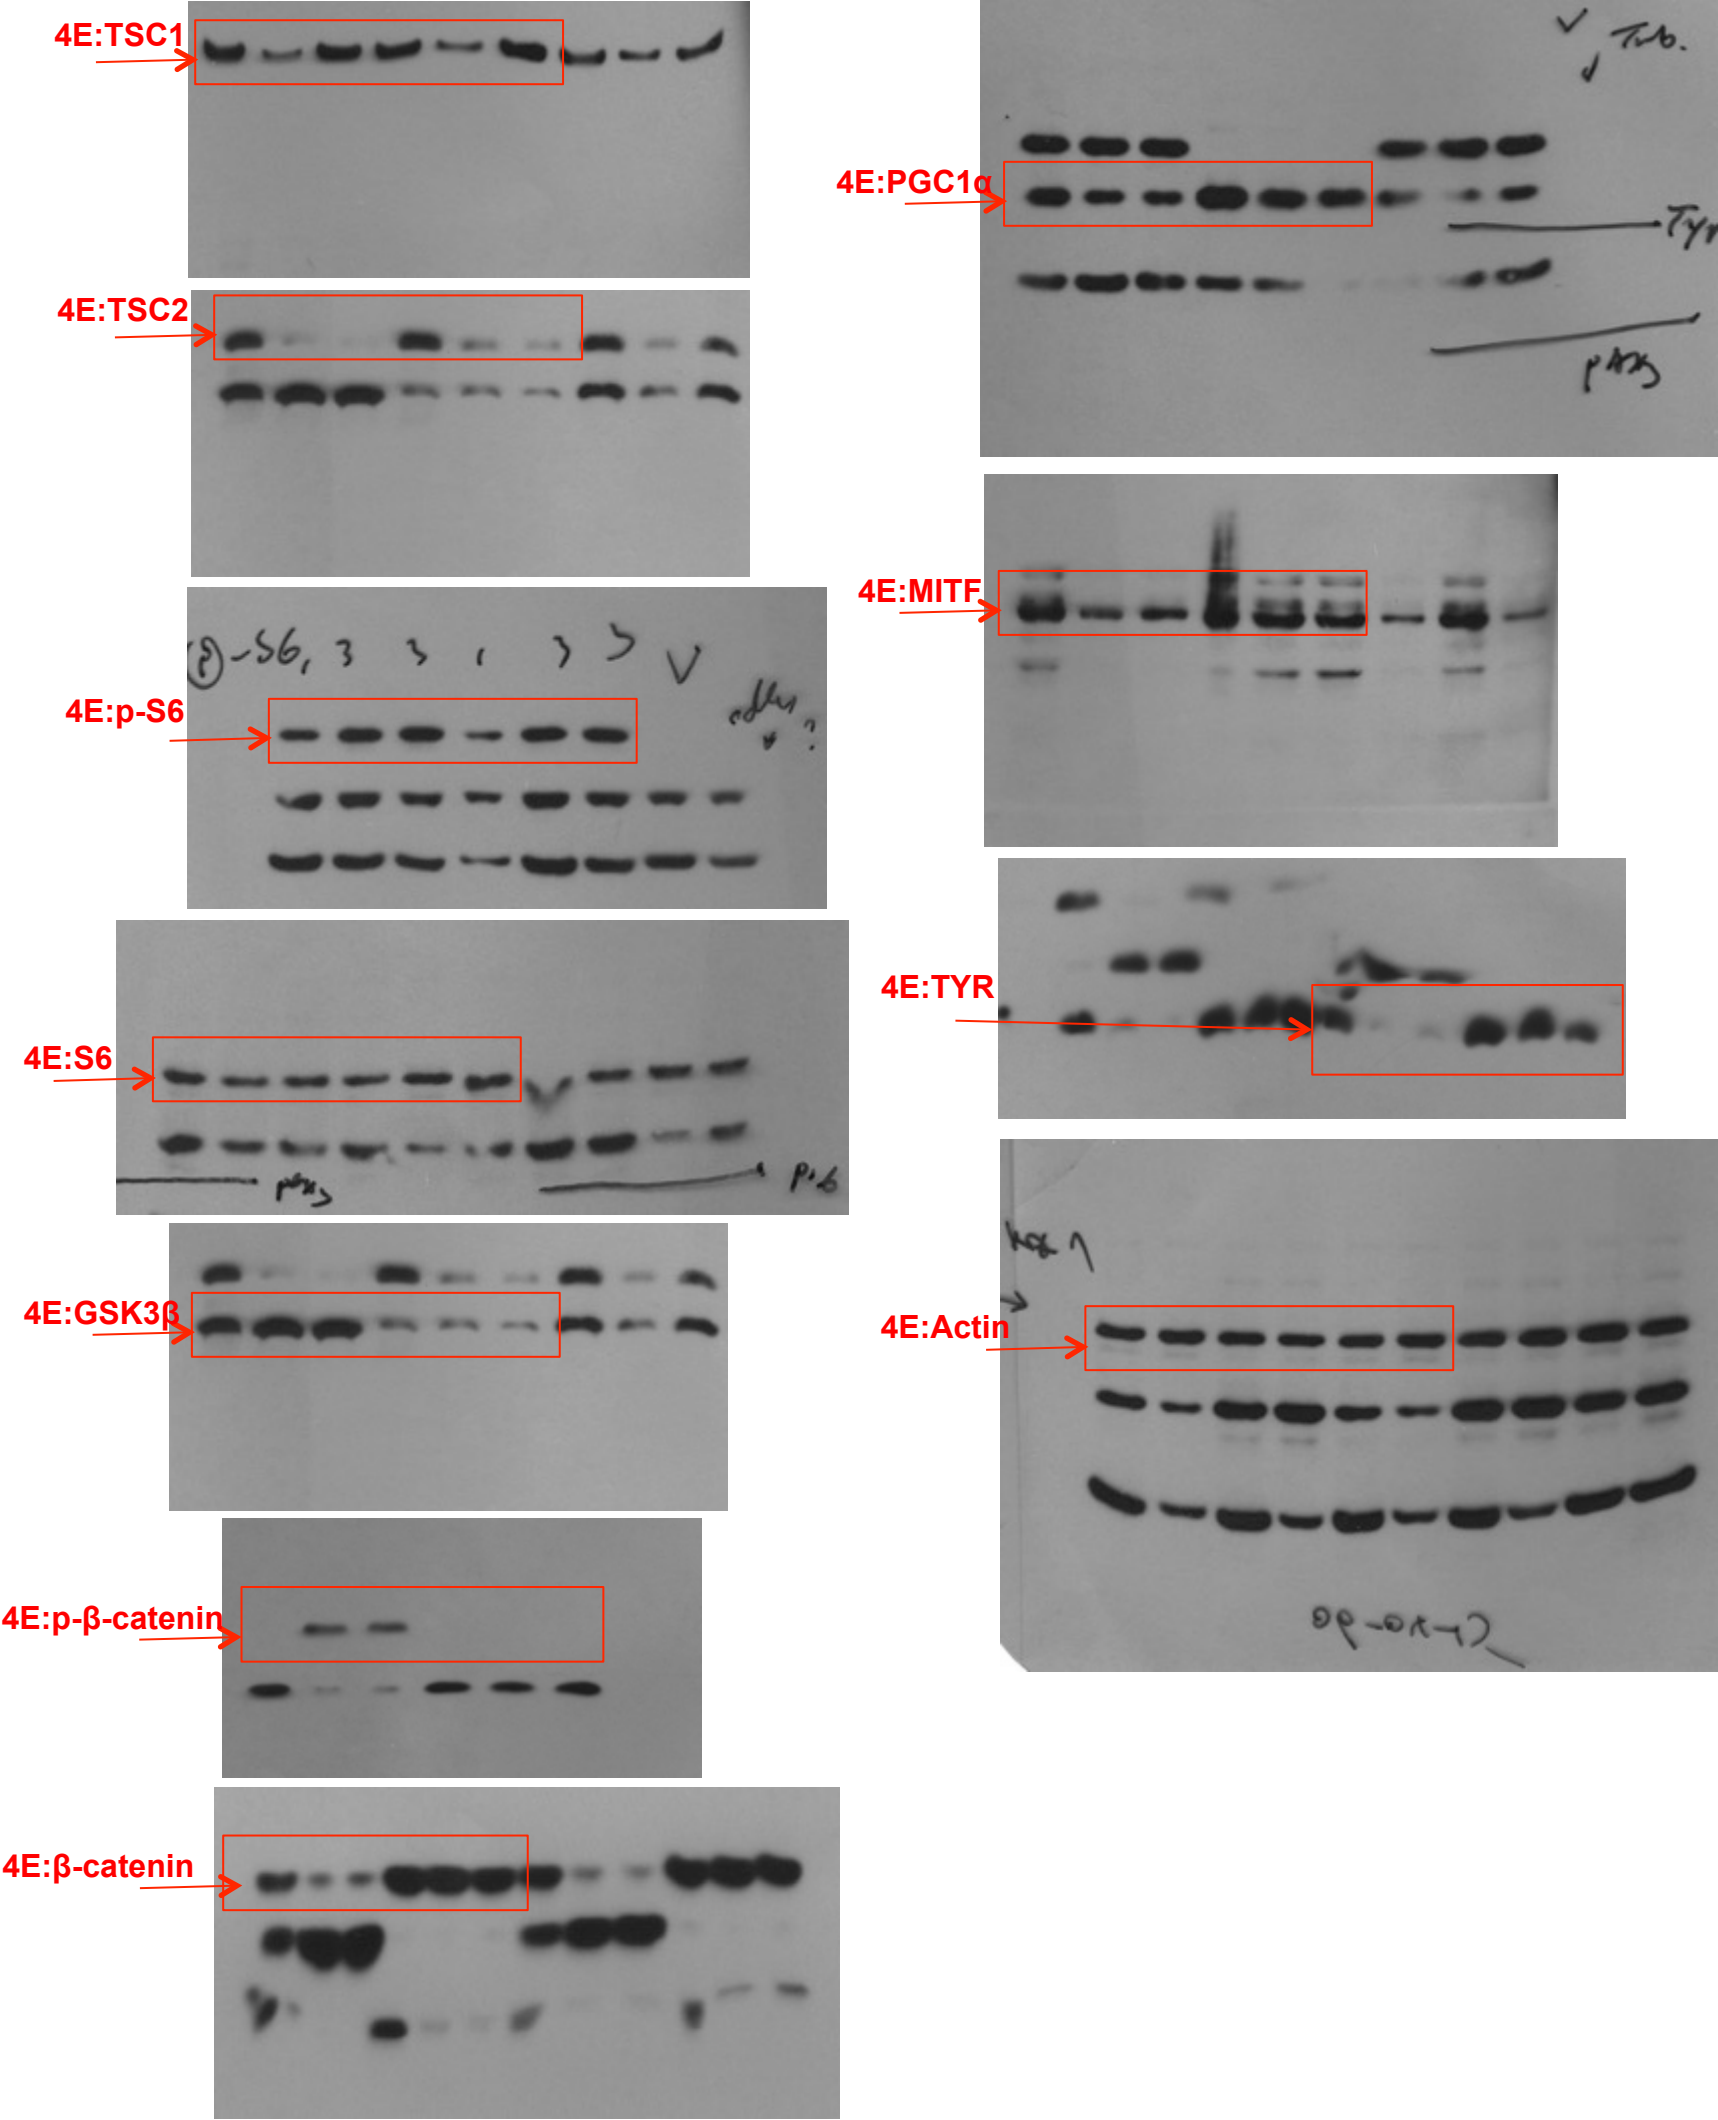

Figure 4

Loading controls for parallel gels in figure 4E

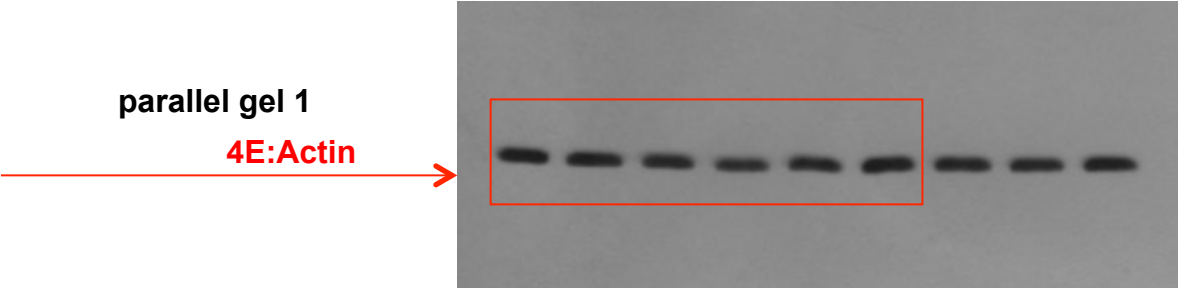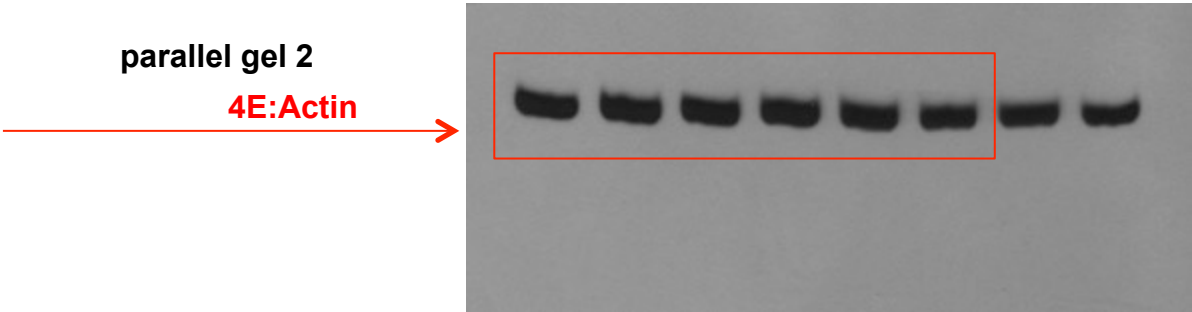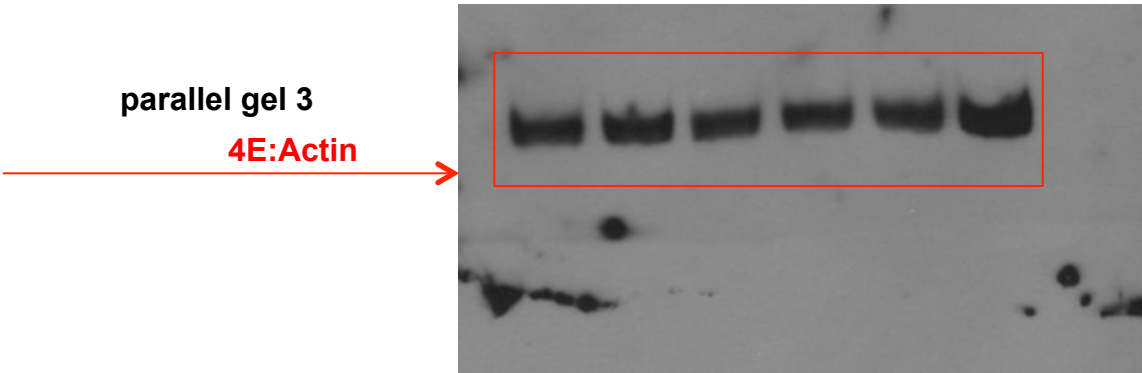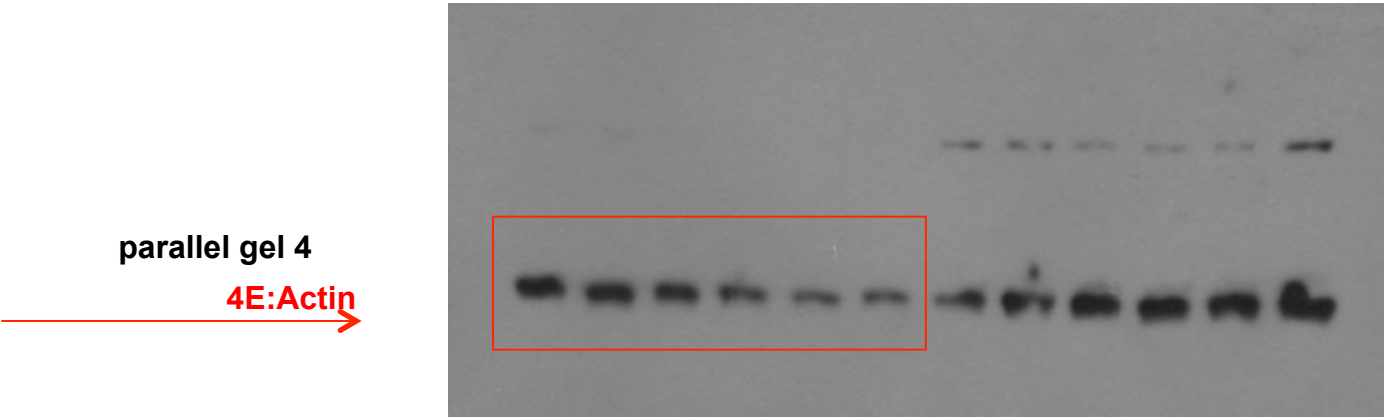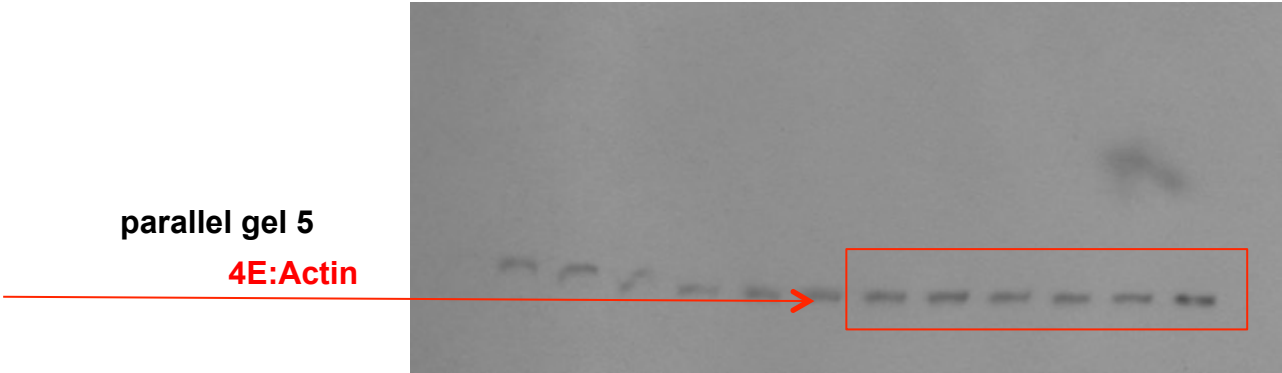

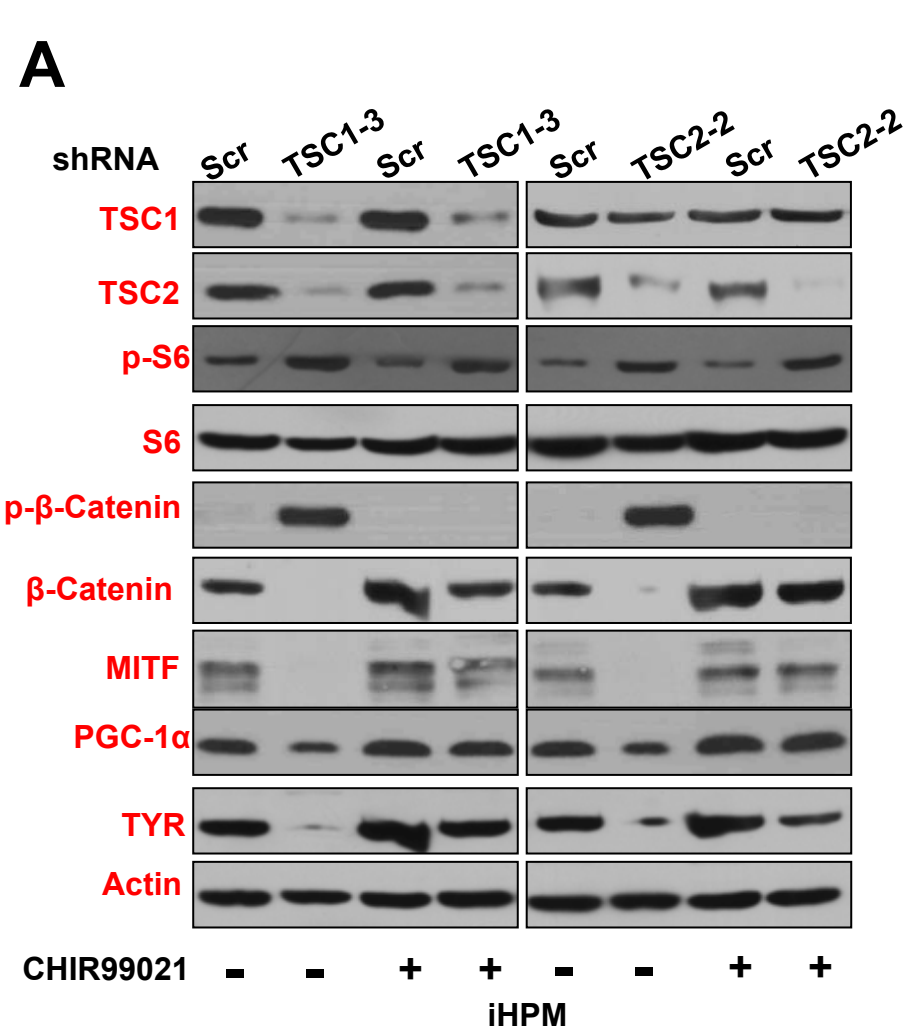

S6    p-β-Catenin    β-Catenin    MITF    PGC-1α    TYR    Actin

Run on same gel, **Actin** in the figure was used as the loading control

Parelle gel 1

TSC1 (left)    TSC2 (left)

Run on same gel, **Actin** was used as the loading control (see uncropped gel image)

Parelle gel 2

TSC1 (Right)    TSC2 (Right)

Run on same gel, **Actin** was used as the loading control (see uncropped gel image)

Parelle gel 3

p-S6

Run on same gel, **Actin** was used as the loading control (see uncropped gel image)

Figure 5



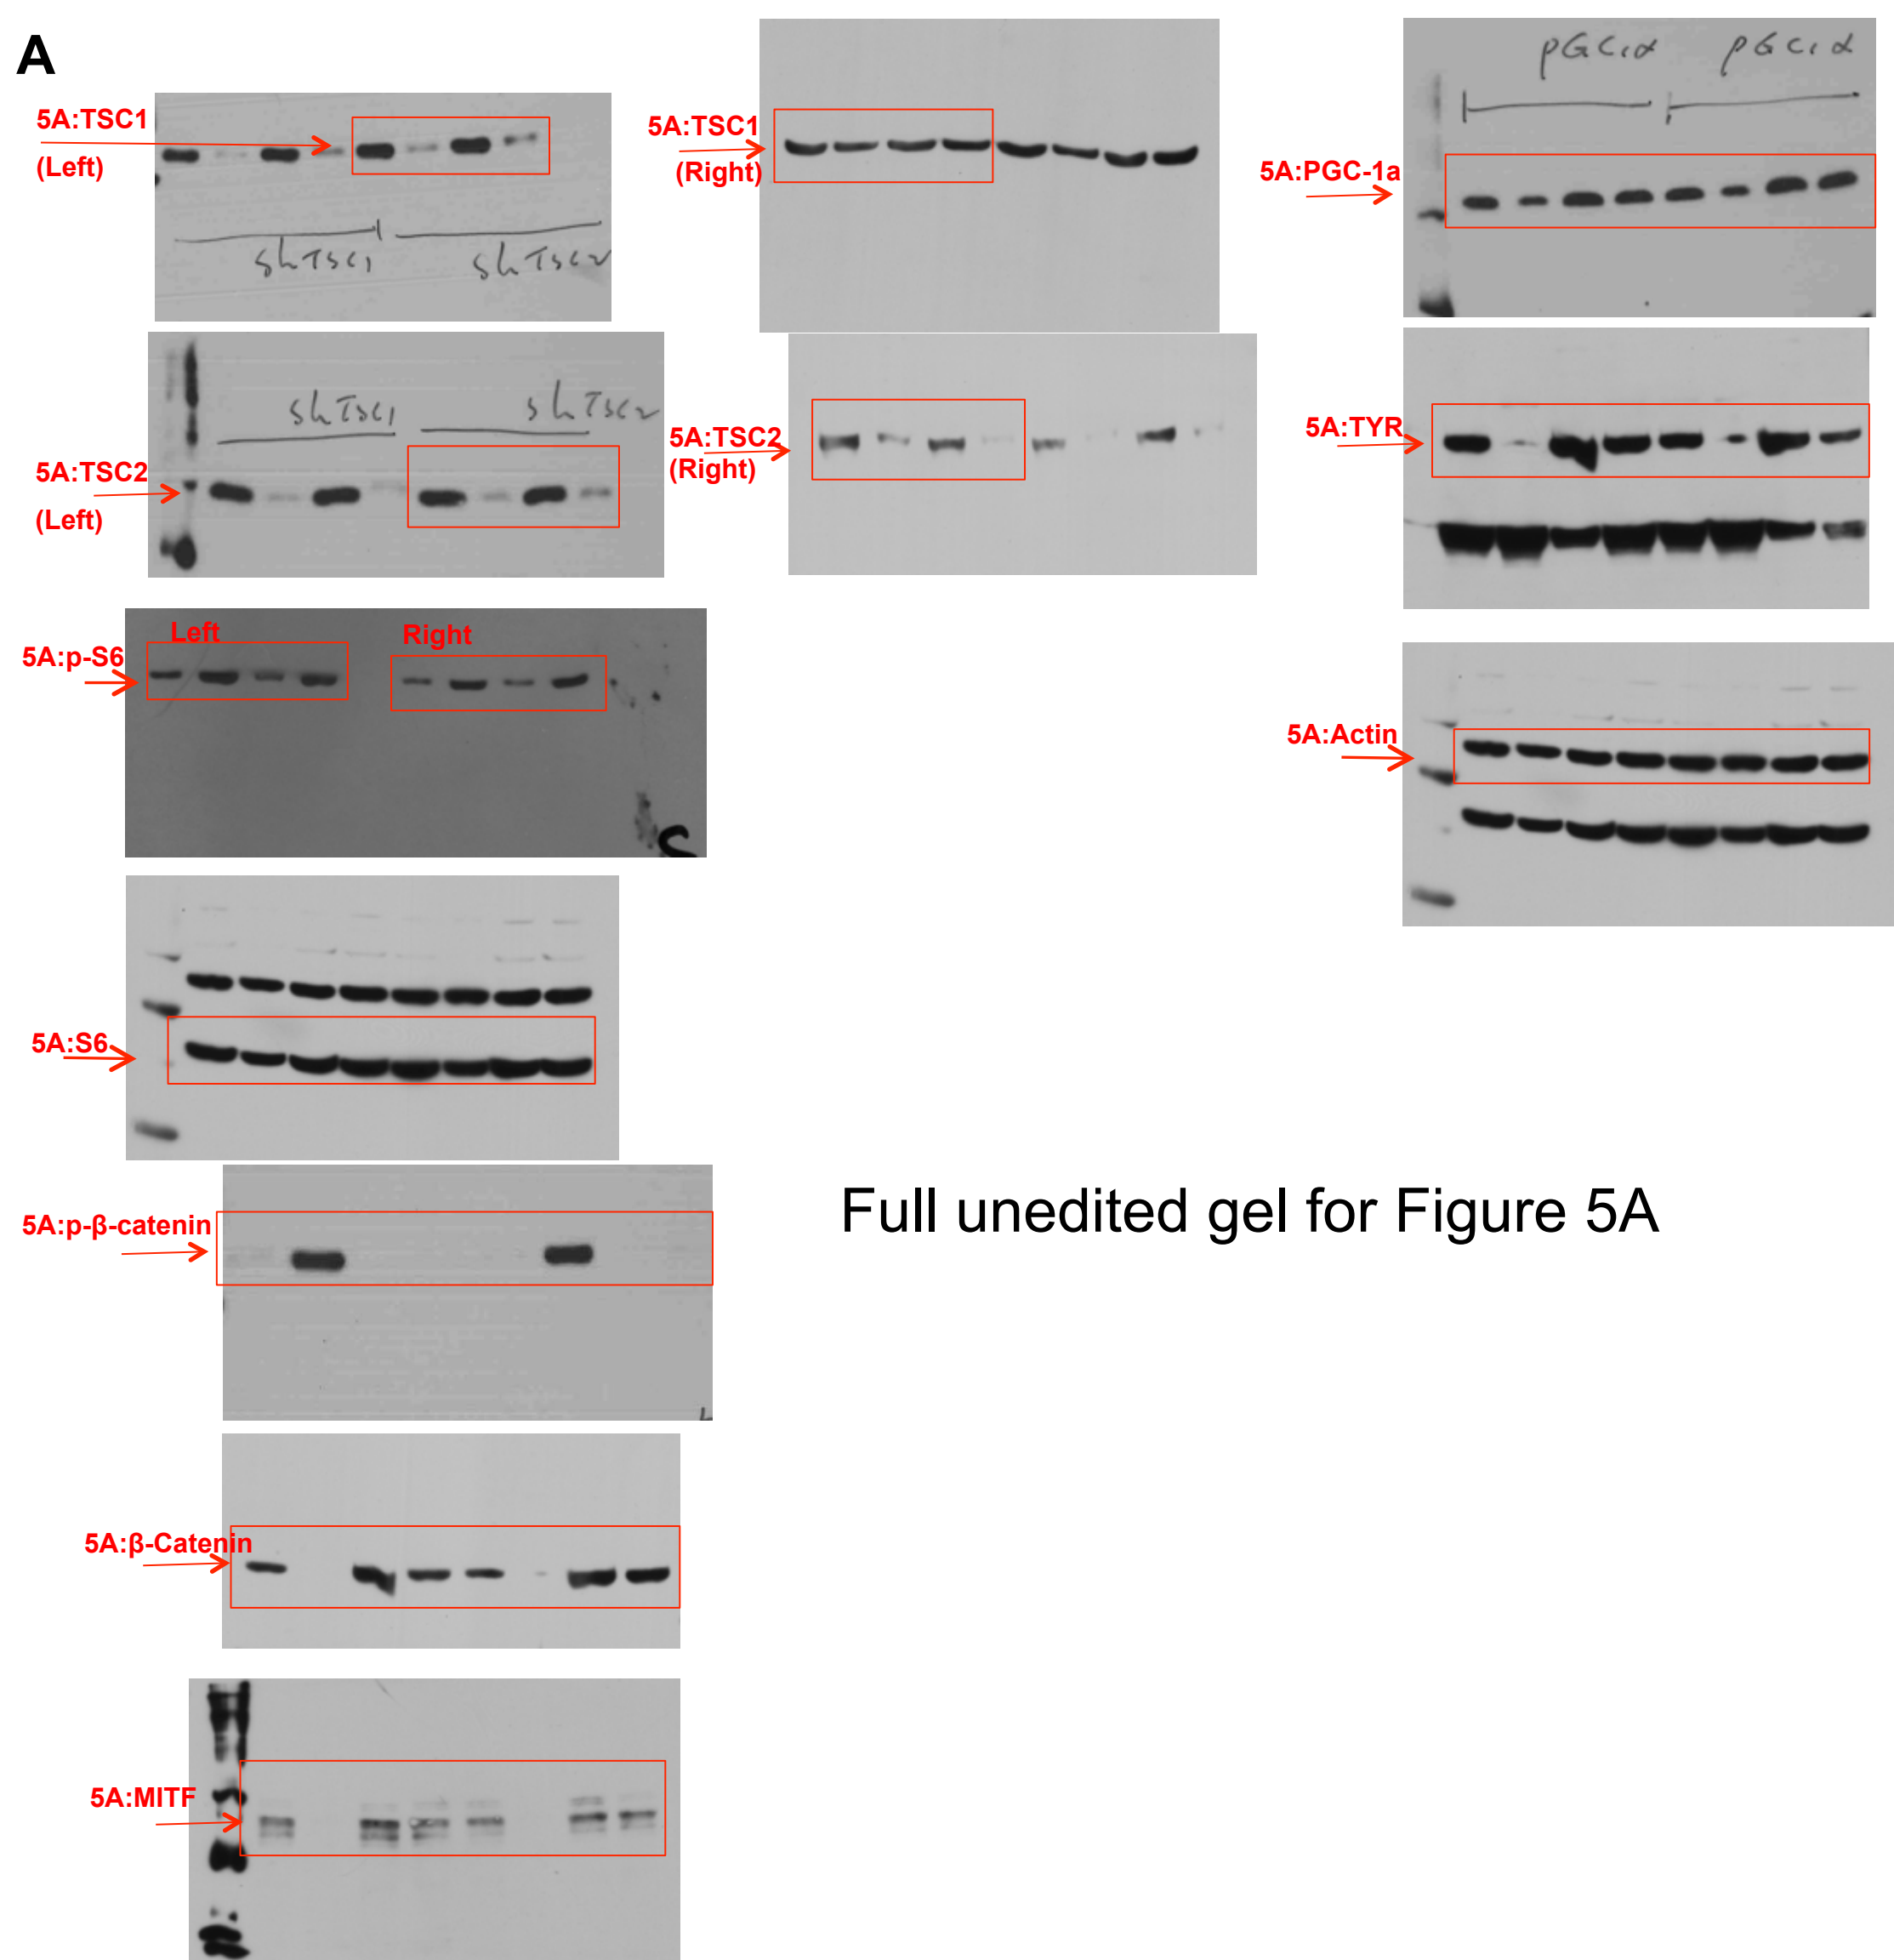

**Figure 5**

Loading controls for parallel gels in figure 5A

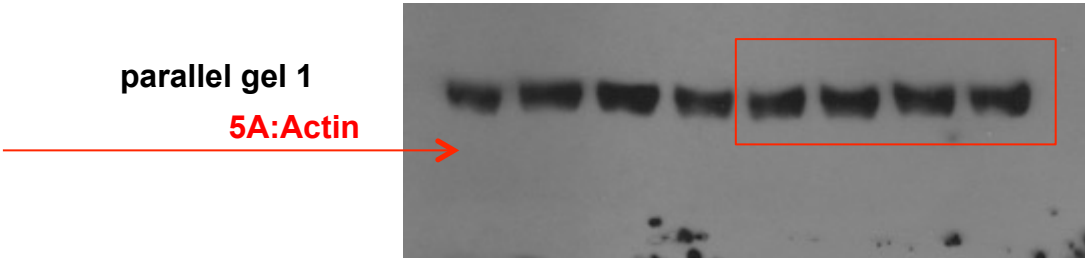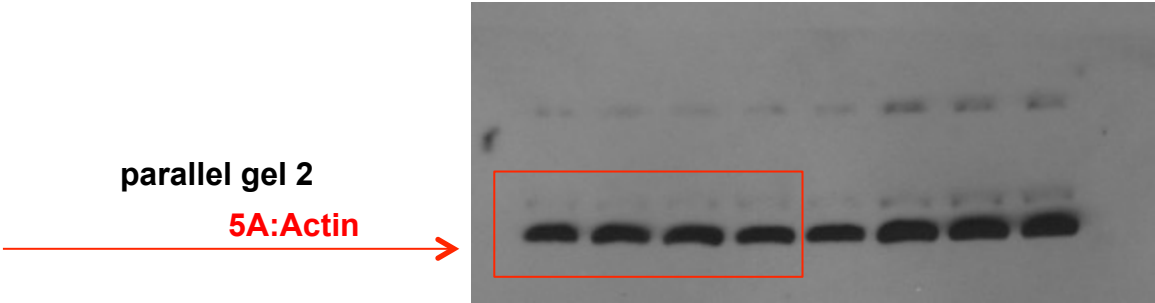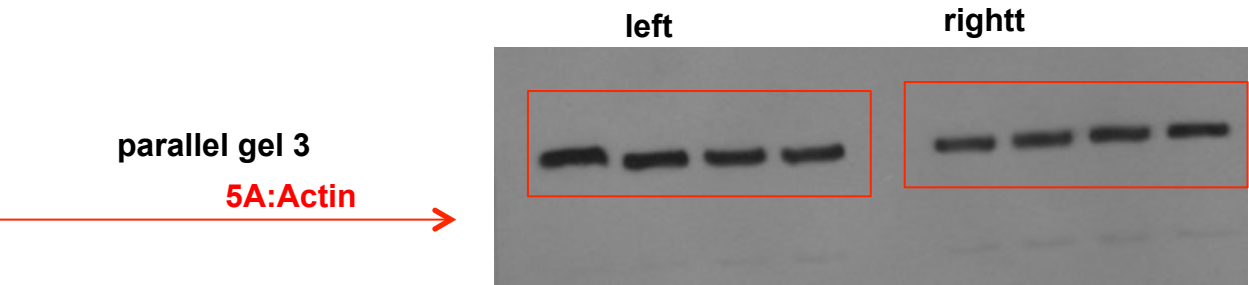

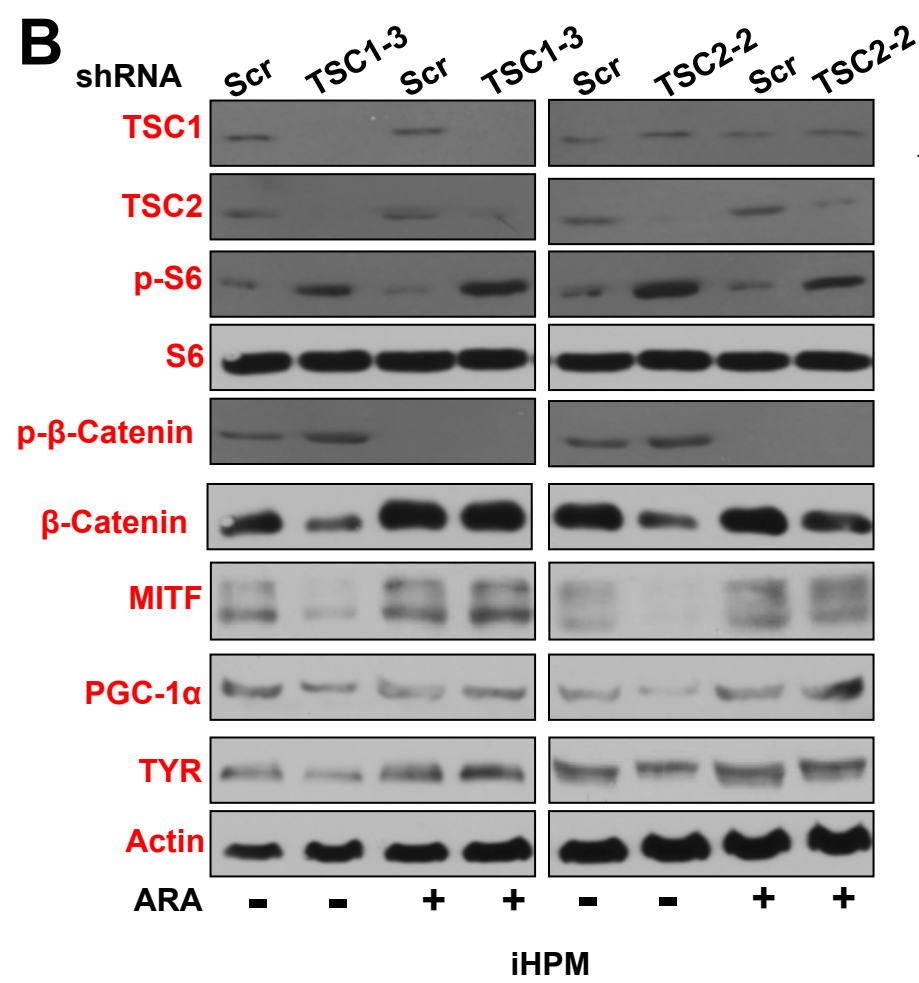

**PGC-1α      Actin**

---

Run on same gel, **Actin** in the figure was used as the loading control

Parallel gel 1

**TSC1 (left)**

---

Run on same gel, **Actin** was used as the loading control (see uncropped gel image)

Parallel gel 2

**TSC1 (Right)**

---

Run on same gel, **Actin** was used as the loading control (see uncropped gel image)

Parallel gel 3

**TSC2      p-S6      p-β-Catenin**

---

Run on same gel, **Actin** was used as the loading control (see uncropped gel image)

Parallel gel 4

**TYR (left)      MITF(right)**

---

Run on same gel, **Actin** was used as the loading control (see uncropped gel image)

Parallel gel 5

**TYR (right)      MITF (left)**

---

Run on same gel, **Actin** was used as the loading control (see uncropped gel image)

Parallel gel 6

**S6      β-Catenin**

---

Run on same gel, **S6** in the figure was used as the loading control, no extra loading control needed

**Figure 5**

Full unedited gel for Figure 5B

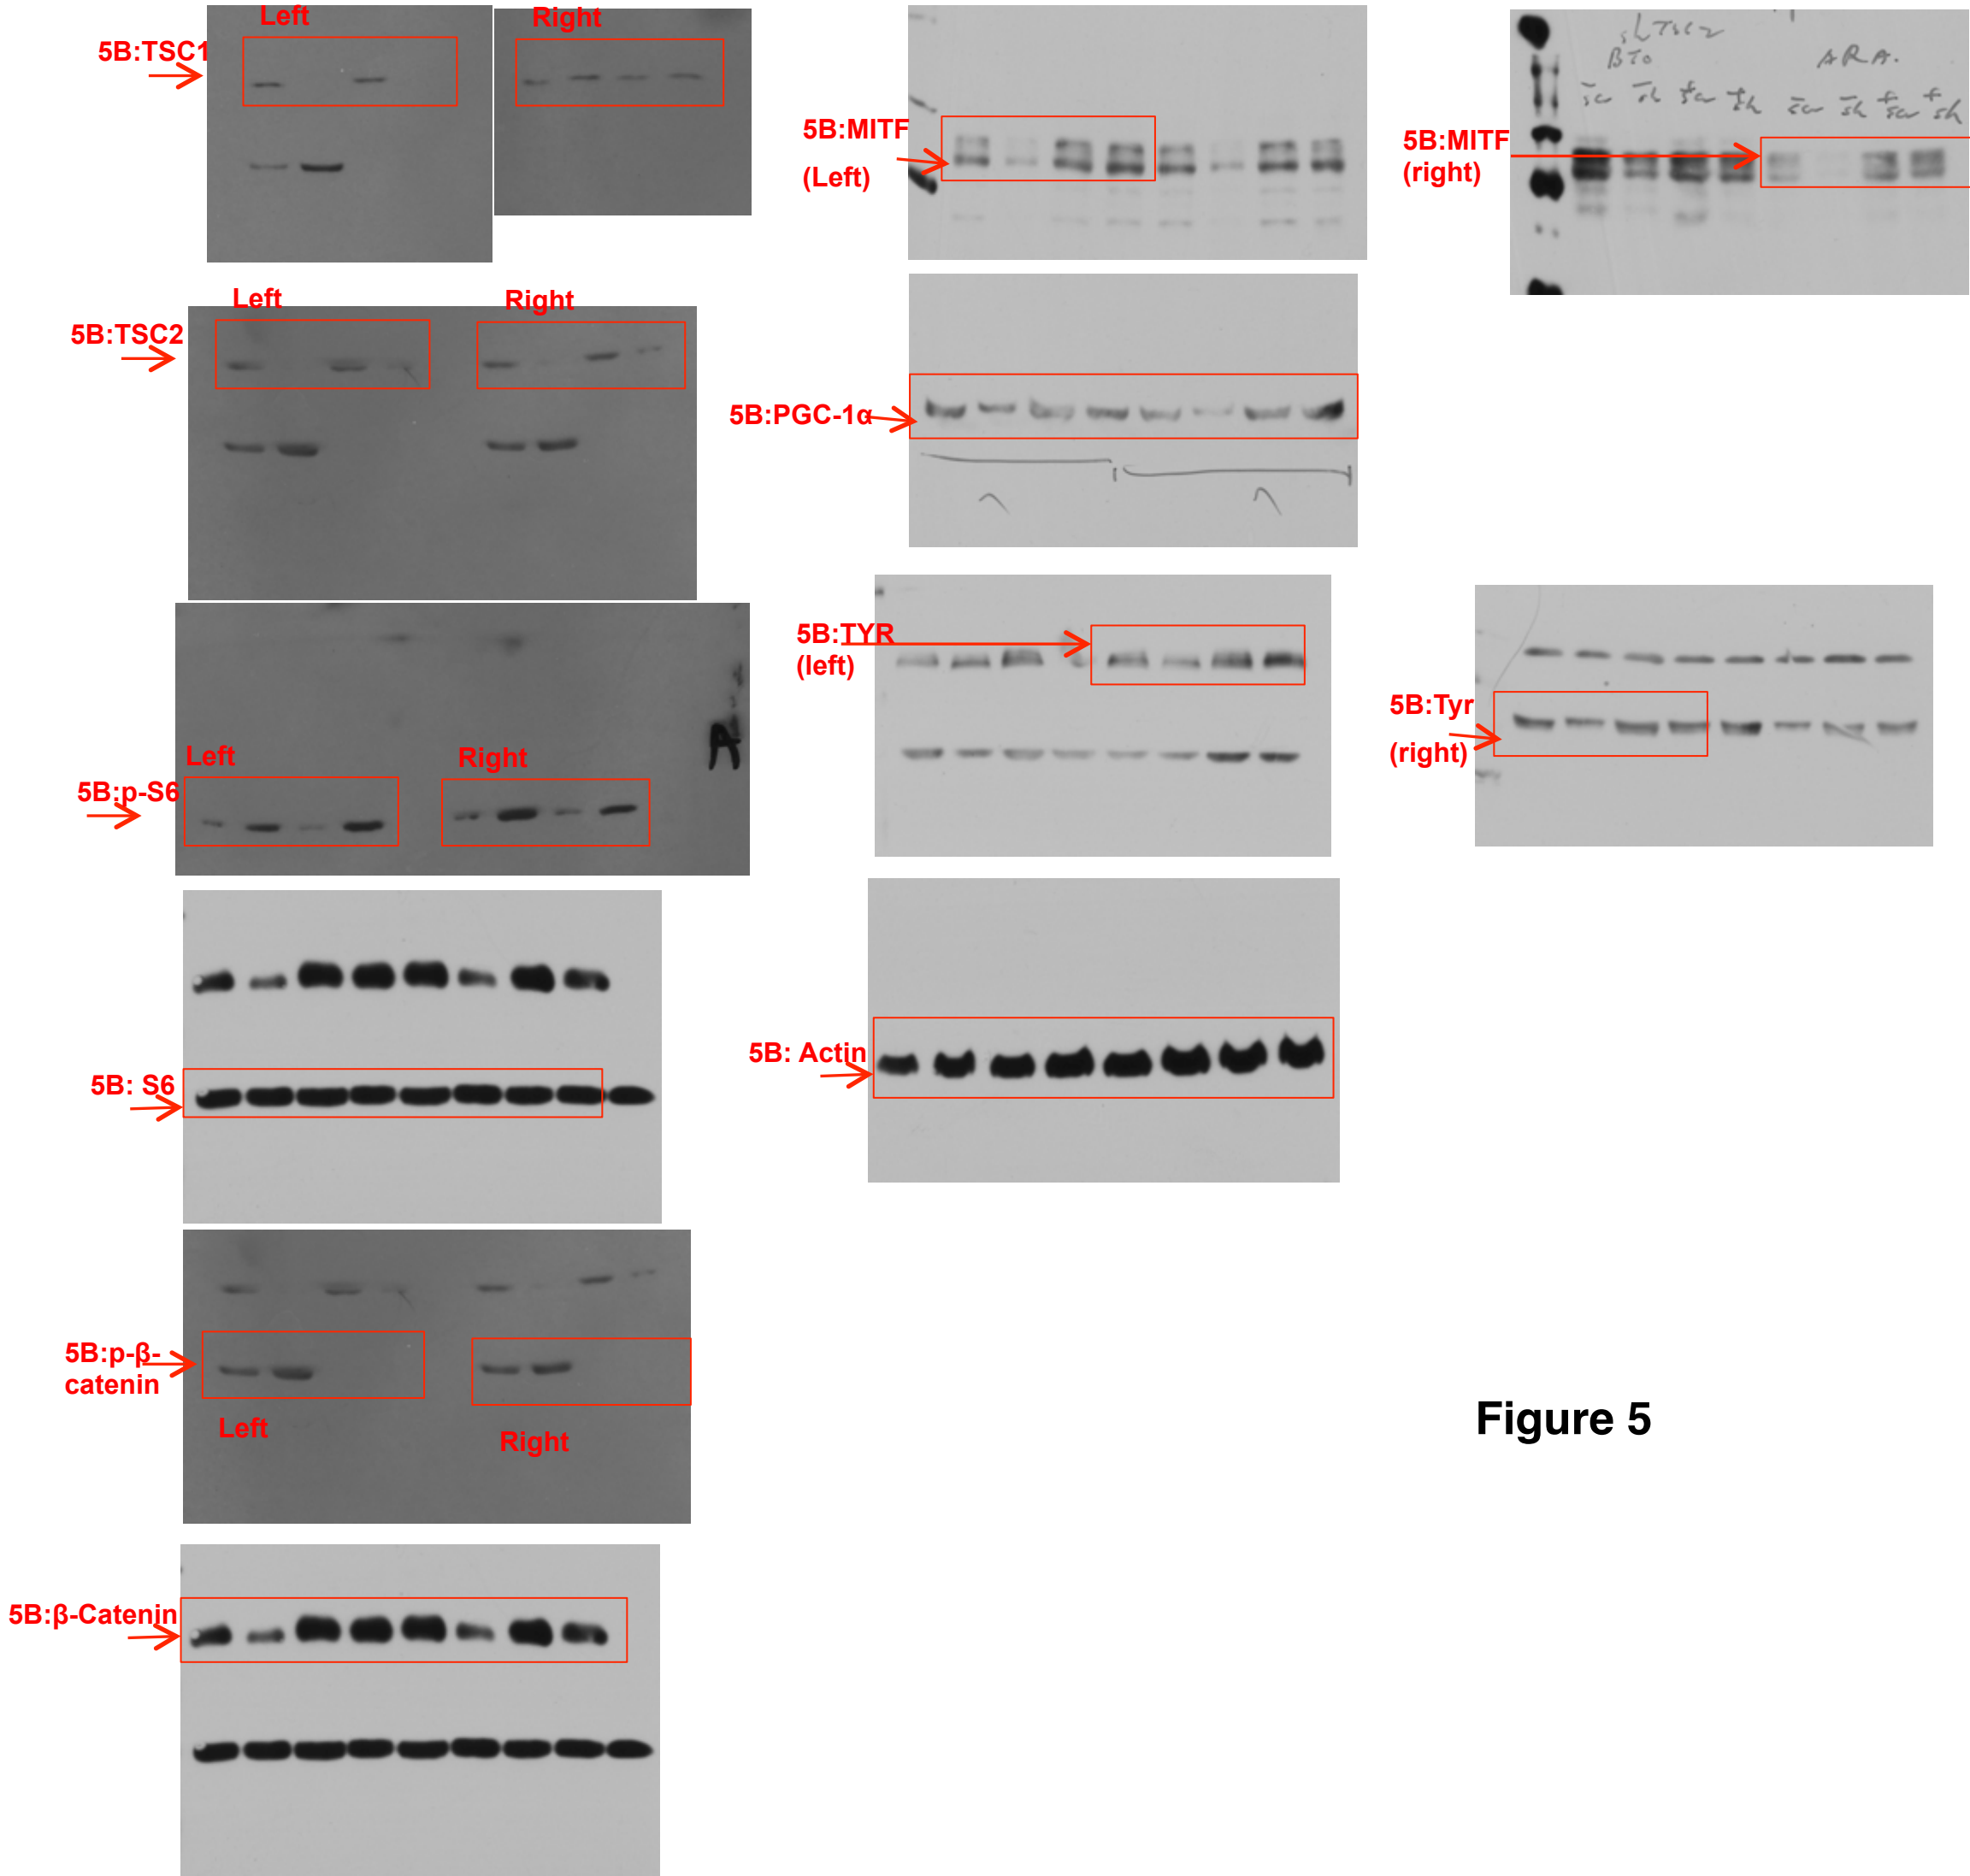

Figure 5

# Loading controls for parallel gels in figure 5B

parallel gel 1

5B:Actin

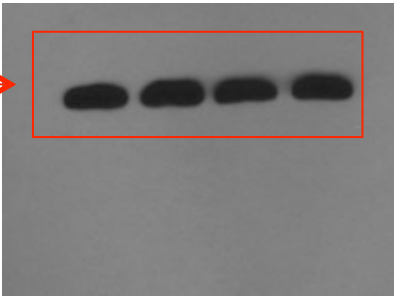

parallel gel 2

5B:Actin

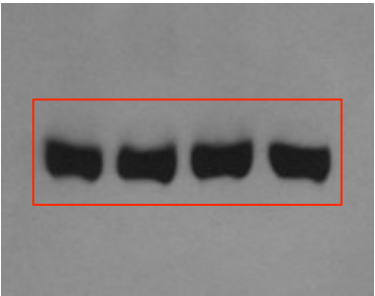

parallel gel 3

5B:Actin

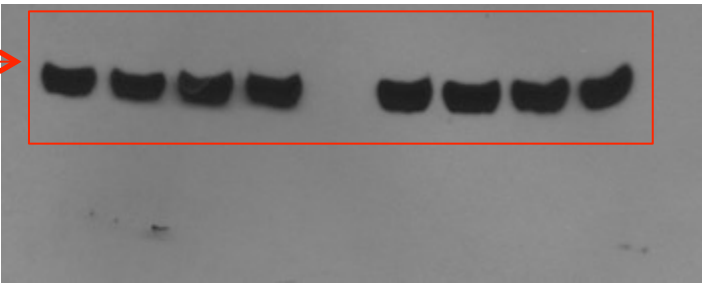

parallel gel 4

5B:Actin

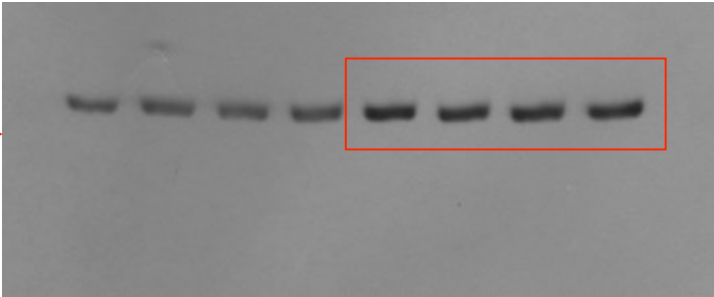

parallel gel 5

5B:Actin

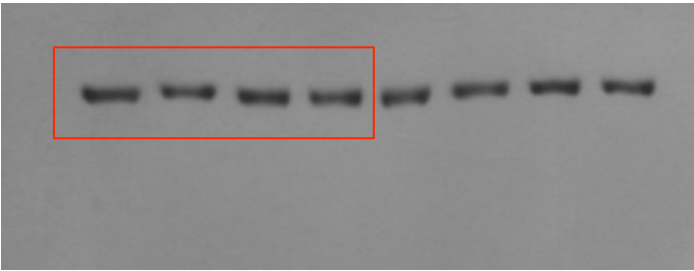

Parallel gel 6

5B

No extra loading control needed

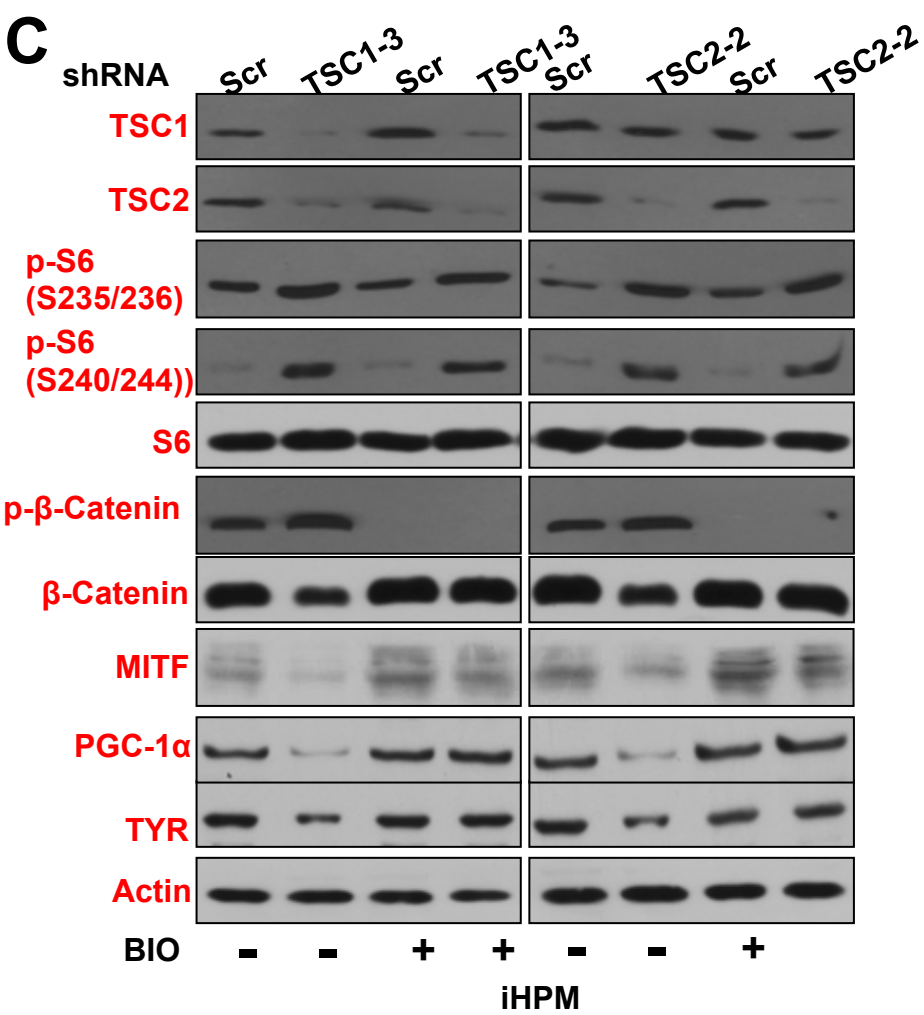

**S6      β-Catenin      MITF      PGC-1α      TYR**

---

Run on same gel, **S6** in the figure was used as the loading control, no extra loading control needed

Parallel gel 1

**TSC1      TSC2      p-S6 (S235/236)      p-S6 (S240/244))      p-β-Catenin**

---

Run on same gel, **Actin** was used as the loading control (see uncropped gel image)

Parallel gel 2

**Actin**

---

Run on same gel, **Actin** in the figure was used as the loading control , no extra loading is needed.

Figure 5

Full unedited gel for Figure 5C

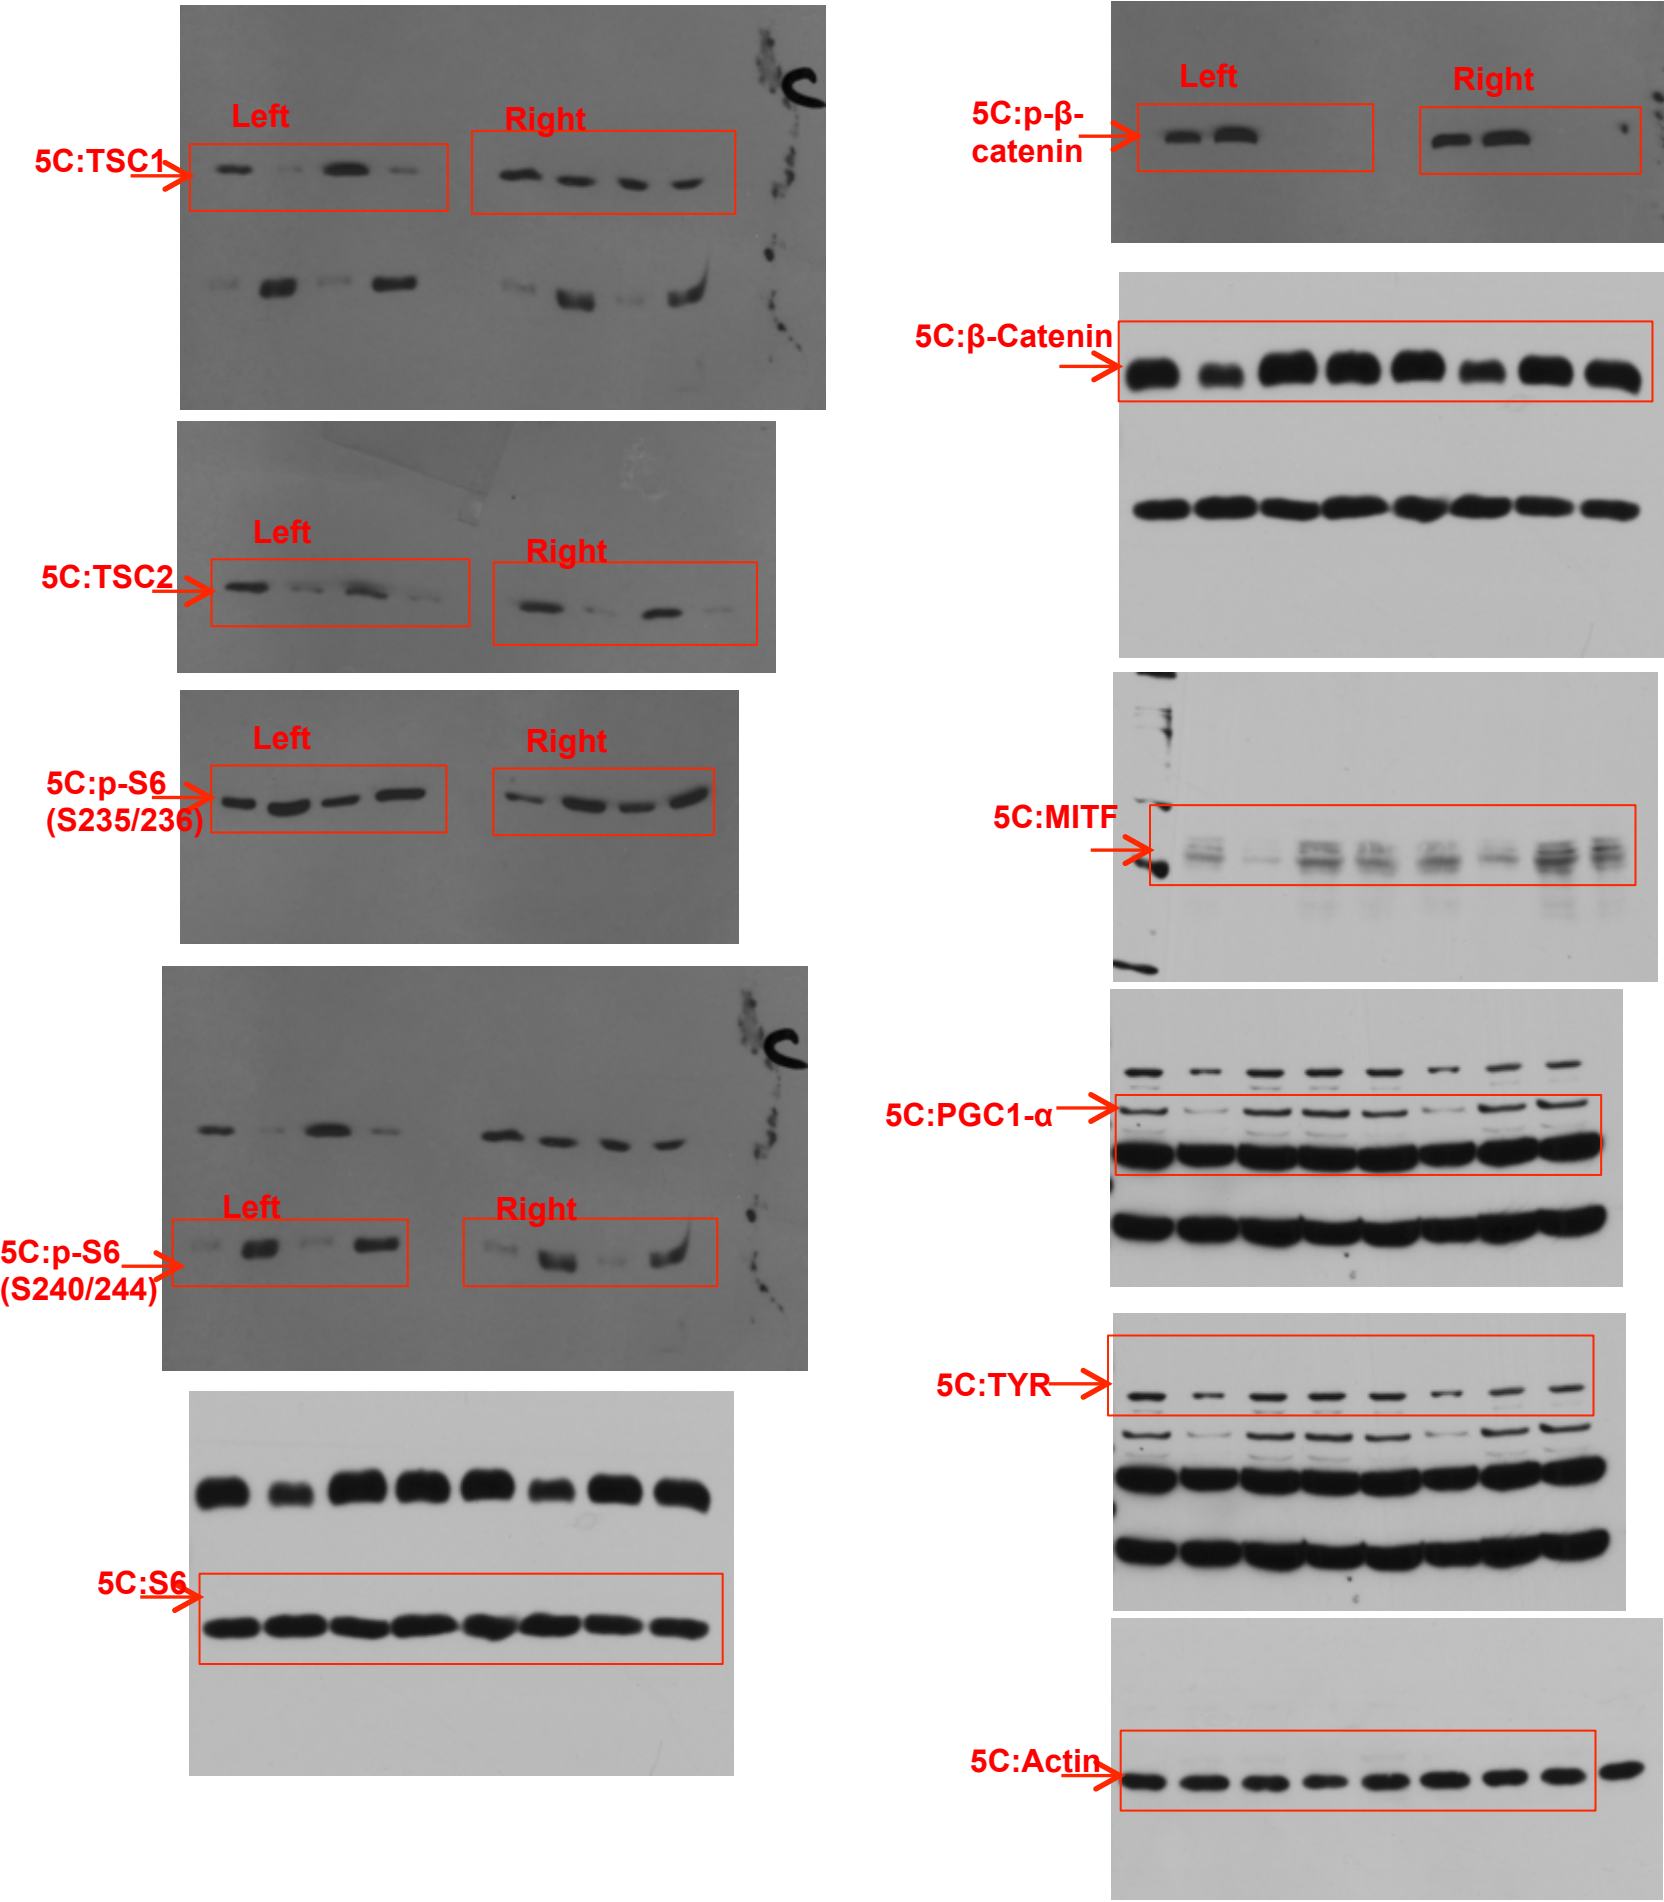

Figure 5

## Loading controls for parallel gels in figure 5C

parallel gel 1

5C:Actin

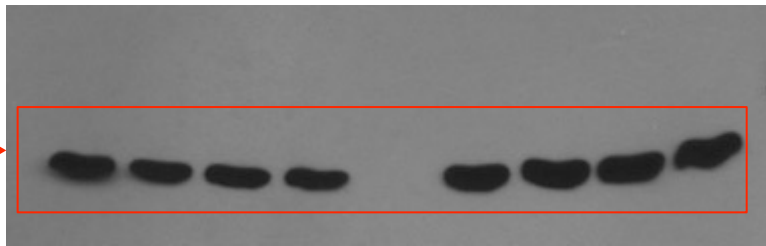

parallel gel 2

5C:Actin

No extra loading  
needed



D

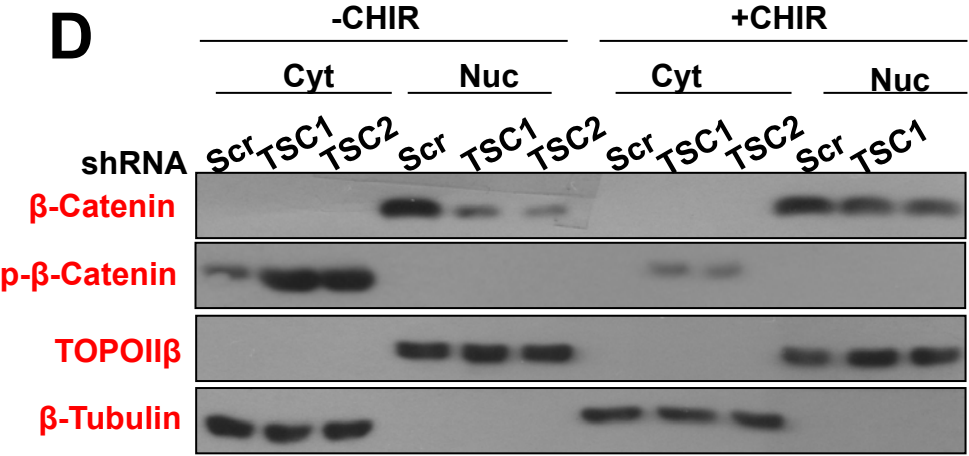

No extra loading needed

E

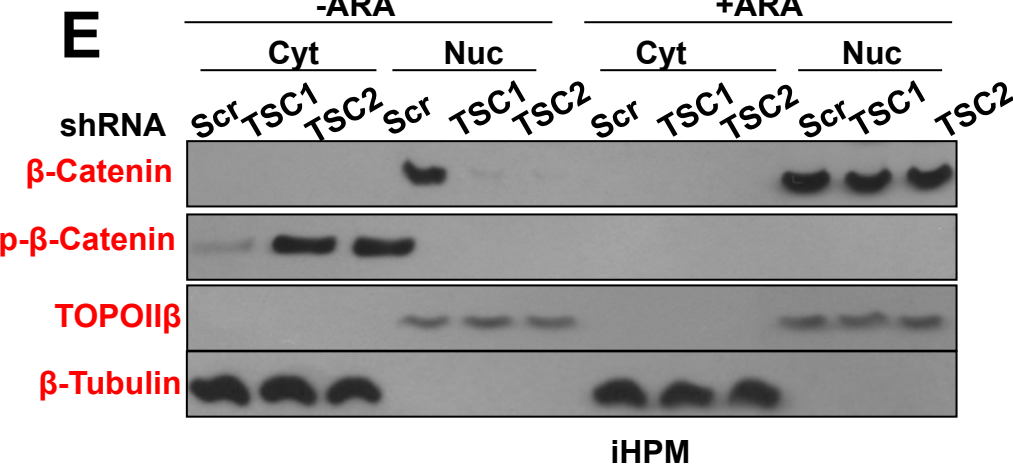

No extra loading needed

Figure 5

**D**

5B:β-catenin

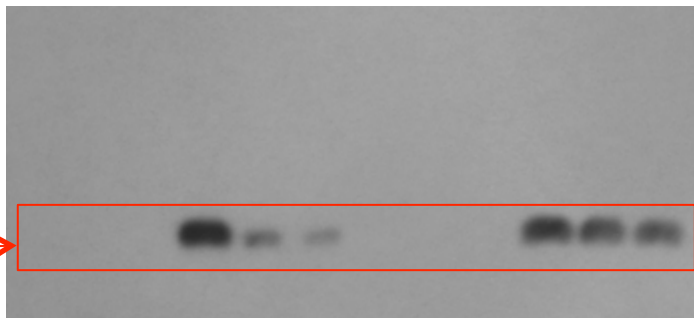

5B:p-β-catenin

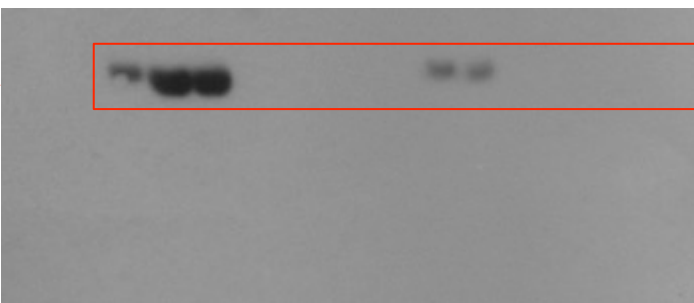

5B:TOP2IIβ

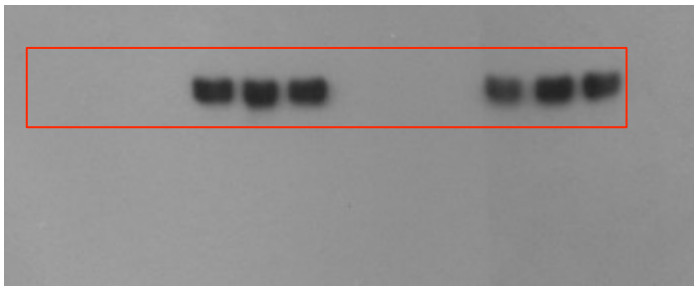

5B:β-Tubulin

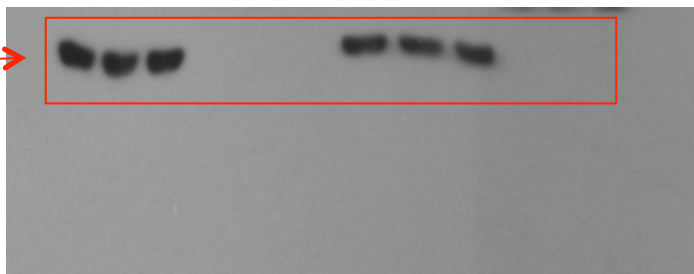

**E**

5G:β-catenin

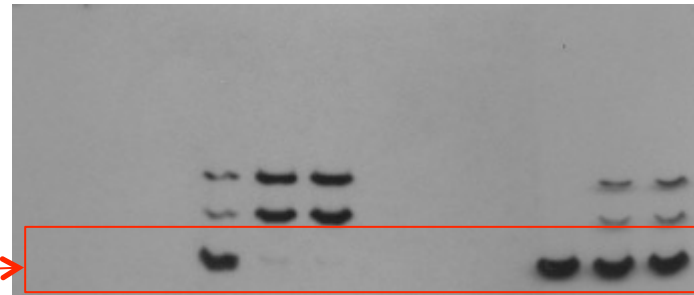

5B:p-β-catenin

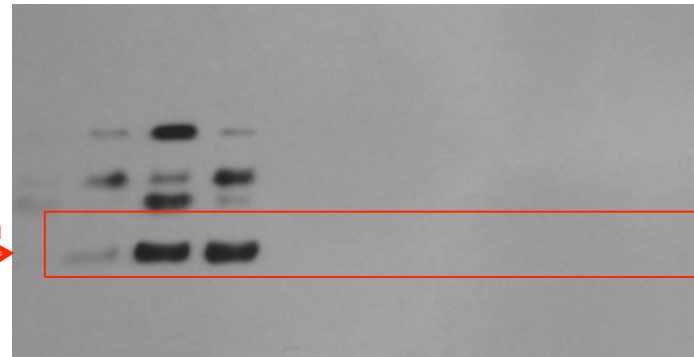

5G:TOP2IIβ

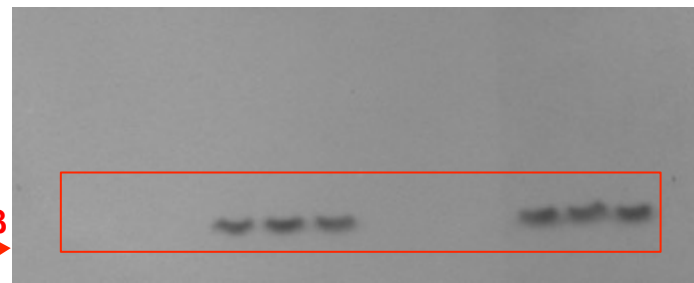

5G:β-Tubulin

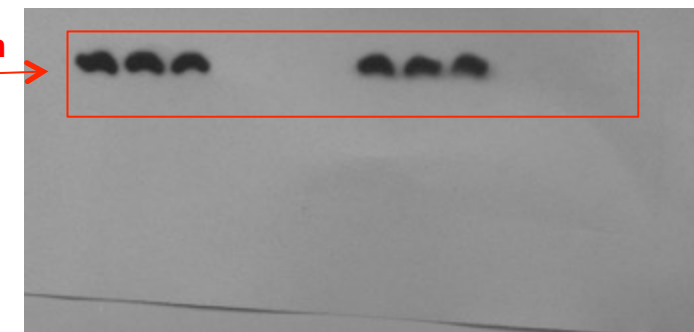

Full unedited gel for Figure5D&E

Loading controls for parallel gels in figure 5D&E

No extra loading control needed

A

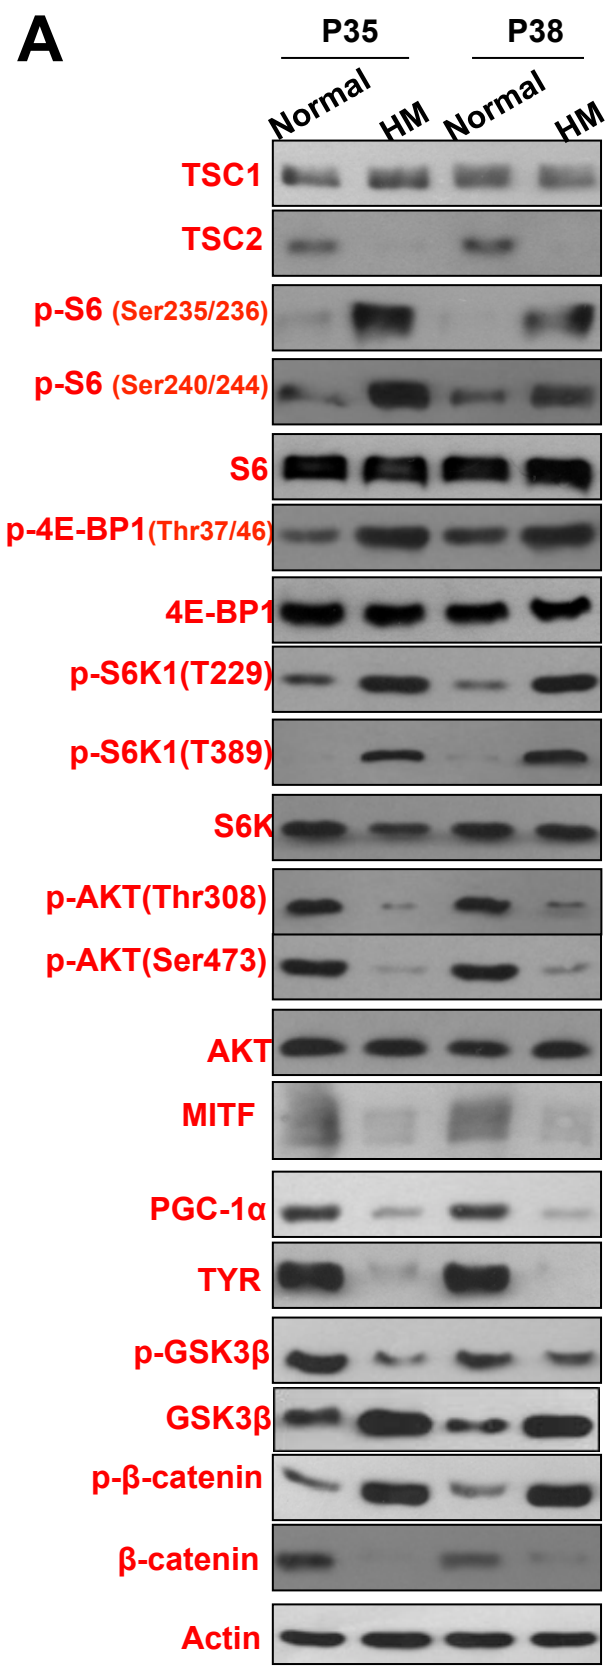

p-S6 (Ser235/236) p-S6 (Ser240/244) S6 4E-BP1 AKT MITF TYR

Run on same gel, **S6** in the figure was used as the loading control, no extra loading control needed

Parallel gel 1

TSC1 TSC2 p-4E-BP1(Thr37/46) PGC-1α GSK3β β-catenin

Run on same gel, **Actin** was used as the loading control (see uncropped gel image)

Parallel gel 2

p-S6K1(T229) p-AKT(Ser473)

Run on same gel, **Actin** was used as the loading control (see uncropped gel image)

Parallel gel 3

p-S6K1(T389) p-AKT(Thr308)

Run on same gel, **Actin** was used as the loading control (see uncropped gel image)

Parallel gel 4

p-GSK3β

Run on same gel, **Actin** was used as the loading control (see uncropped gel image)

Parallel gel 5

β-catenin

Run on same gel, **Actin** was used as the loading control (see uncropped gel image)

Figure 7

A

Full unedited gel for Figure 7A

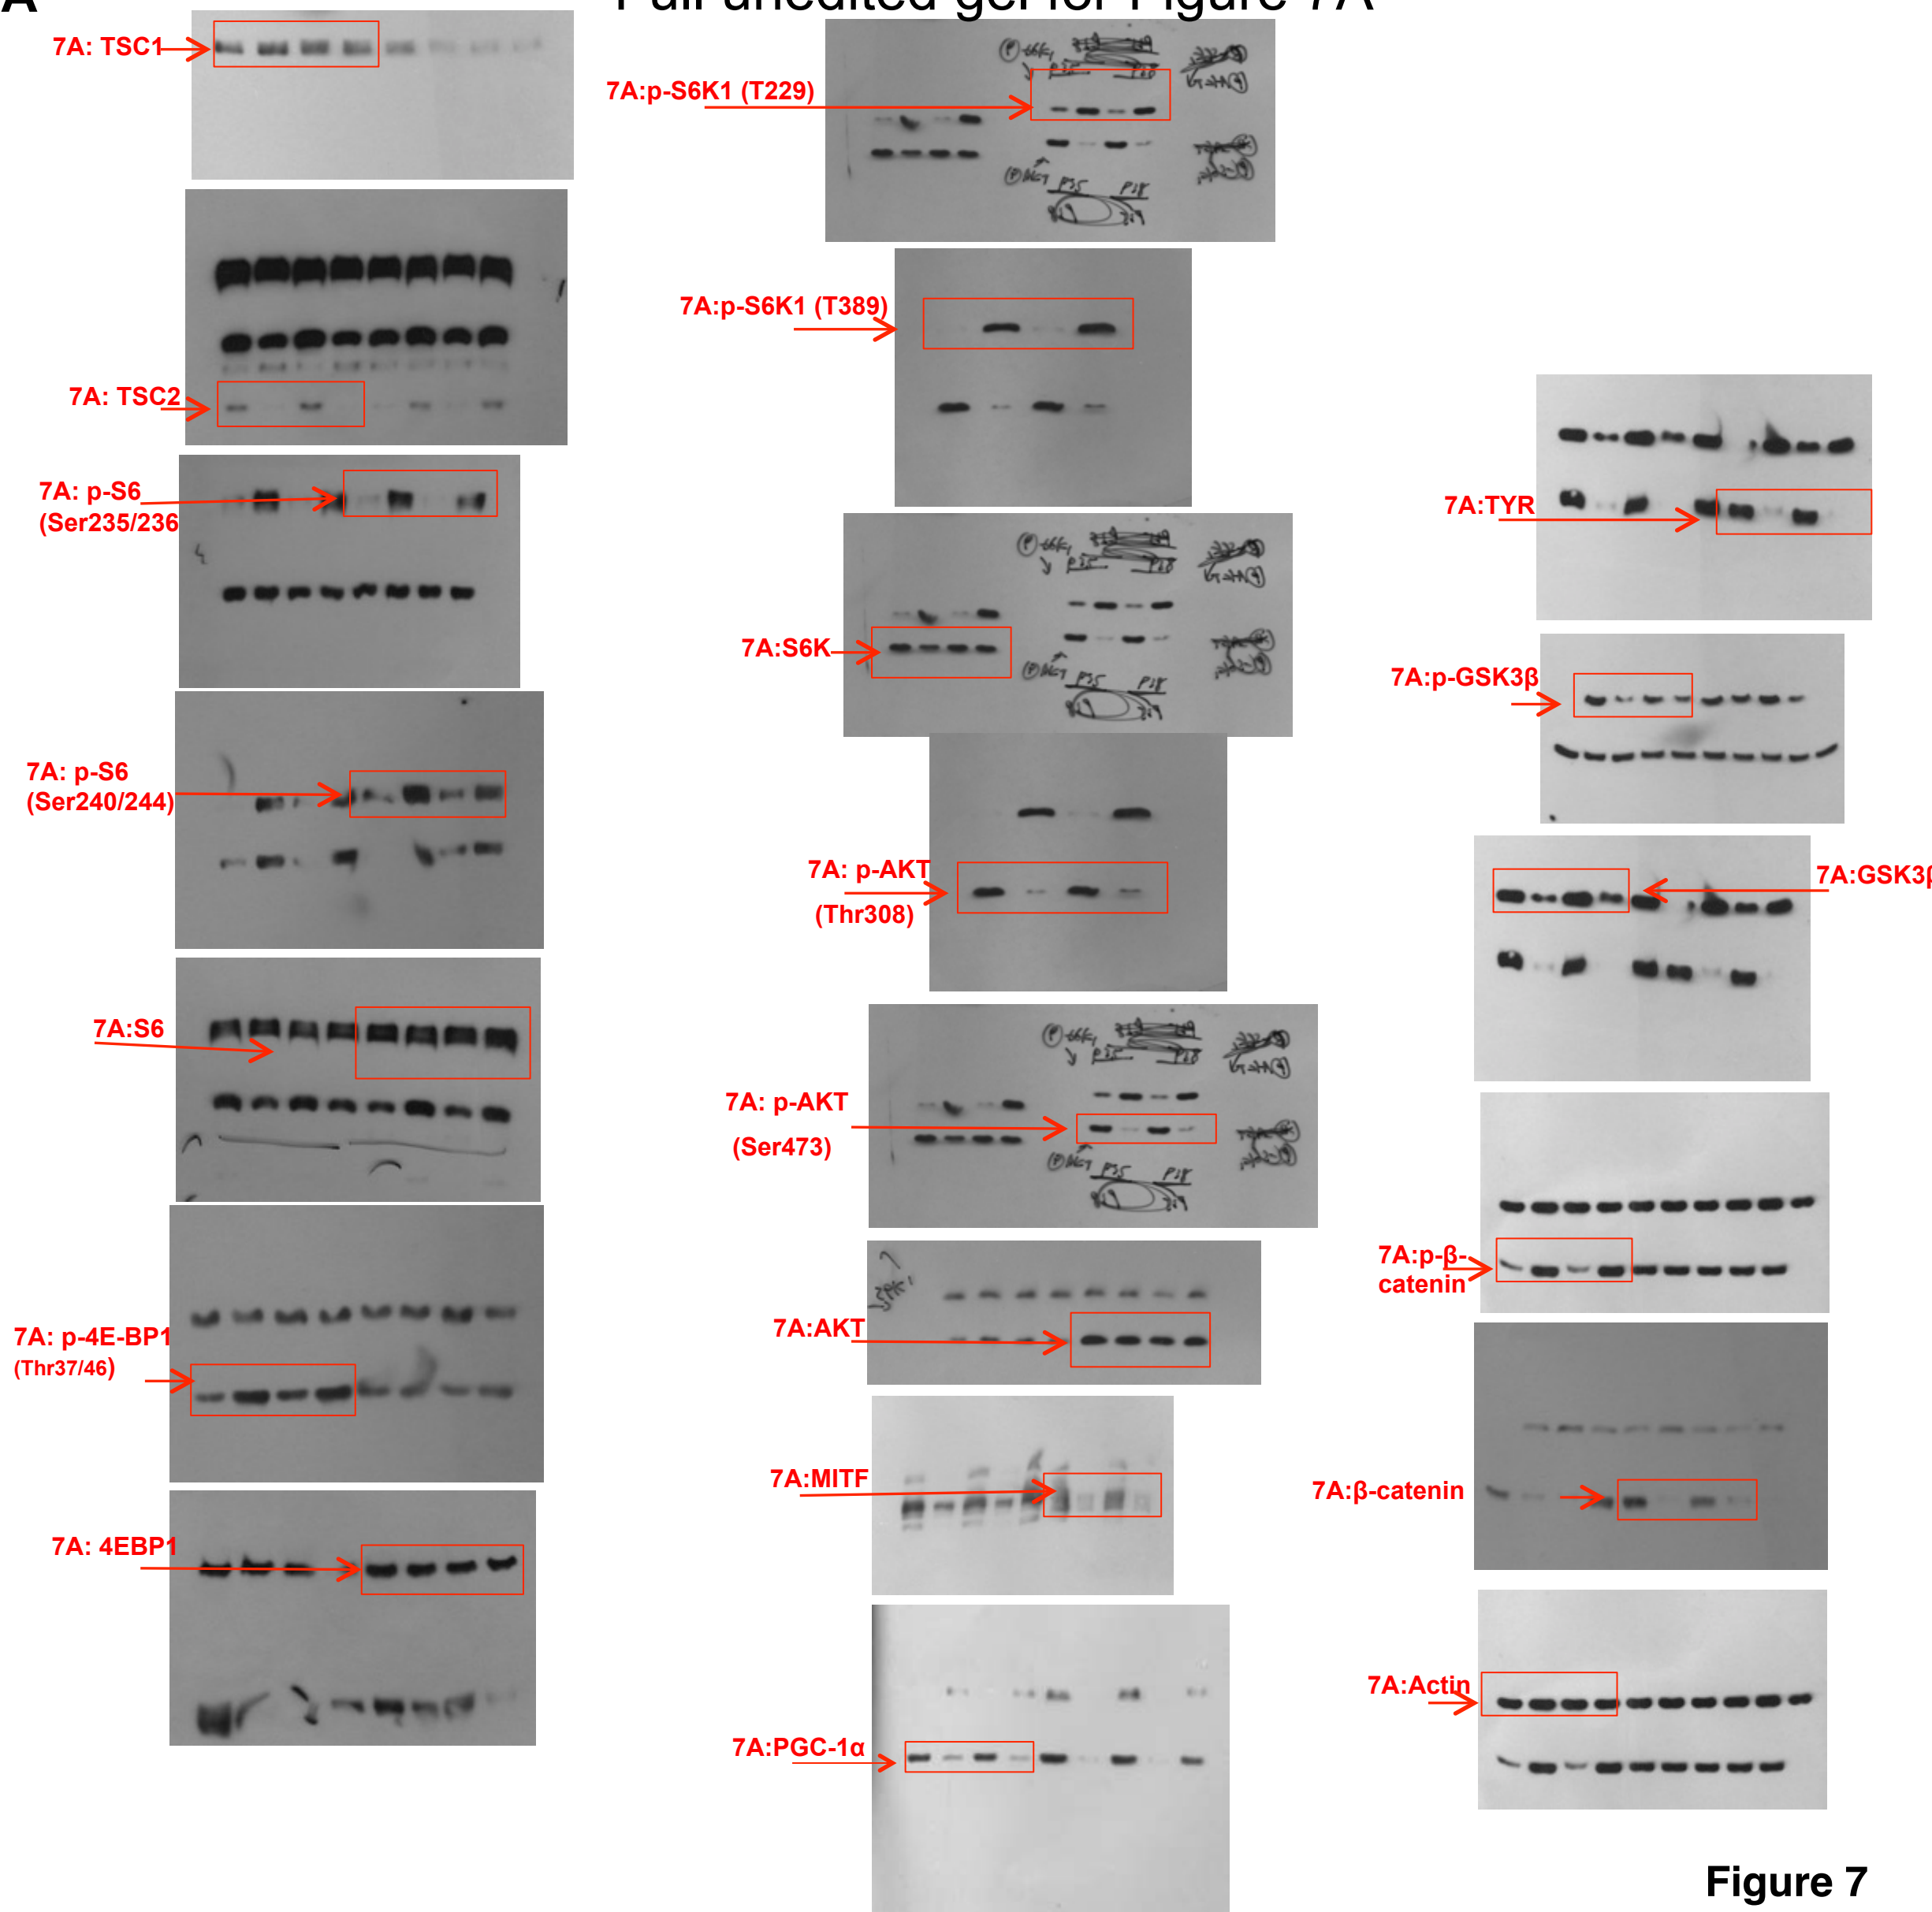

Figure 7

Loading controls for parallel gels in figure 7A

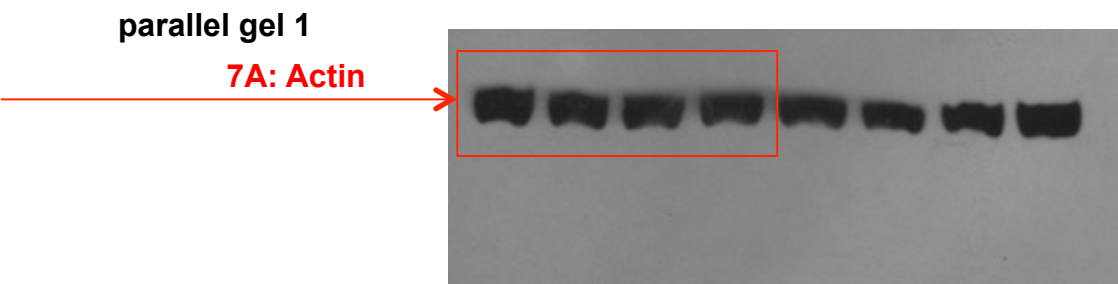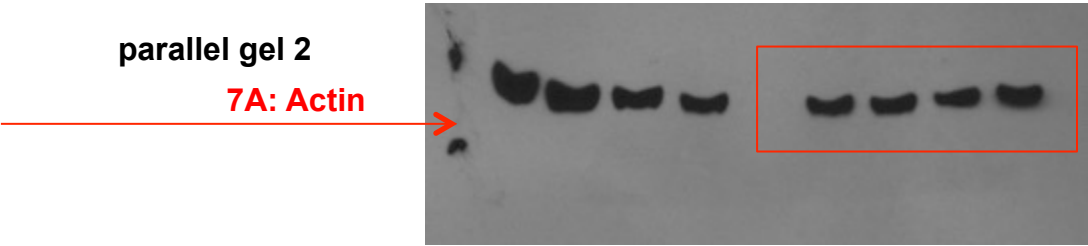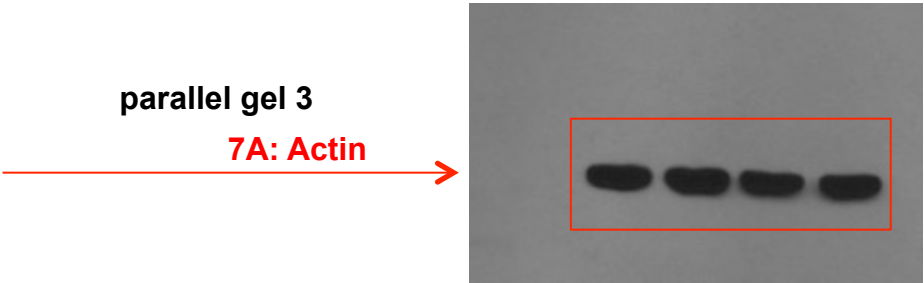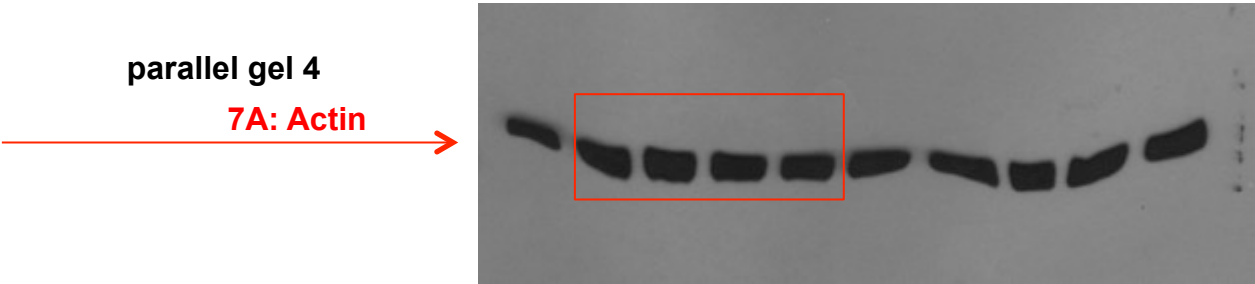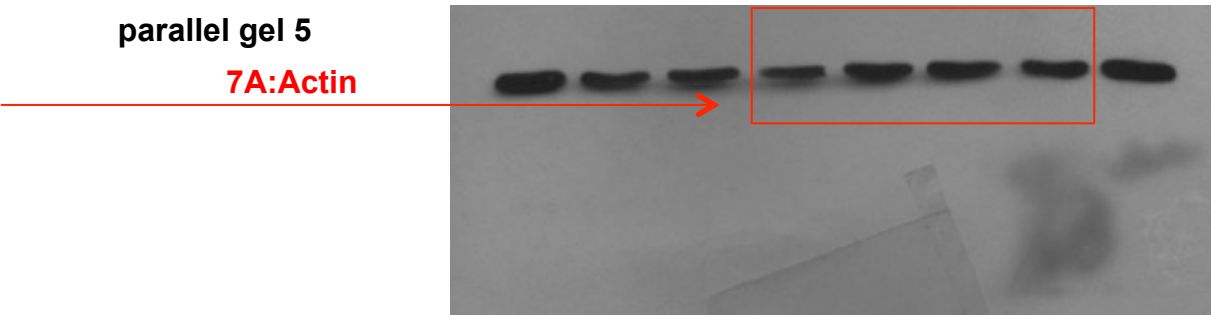

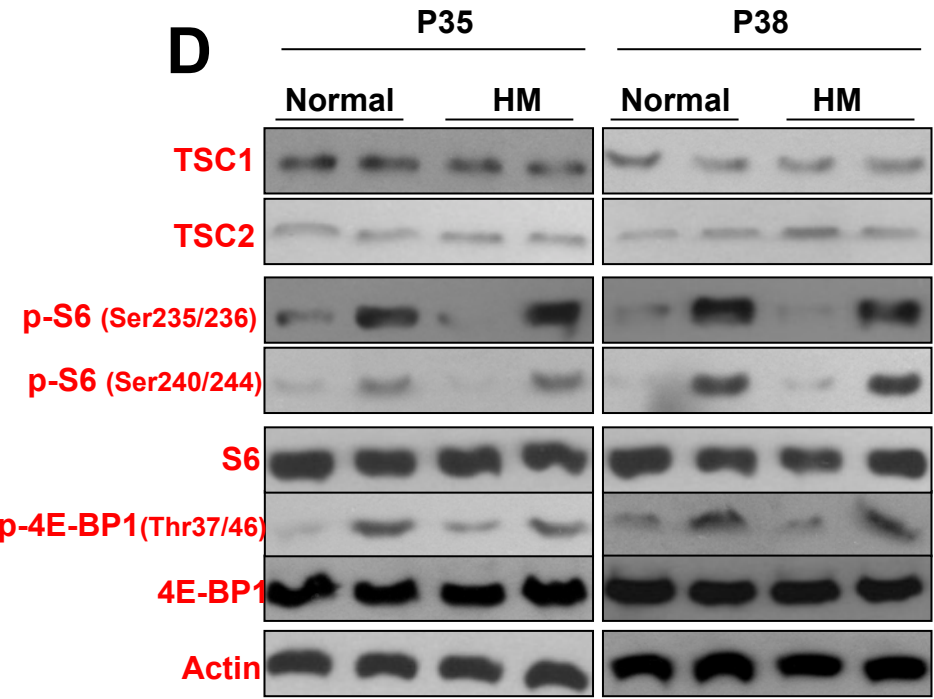

**TSC2    S6    p-4E-BP1(Thr37/46)    Actin**

---

Run on same gel, **Actin** in the figure was used as the loading control

Parallel gel 1

**TSC1 (P35)                      p-S6 (Ser235/236) (P35)**

---

Run on same gel, **Actin** was used as the loading control (see uncropped gel image)

Parallel gel 2

**p-S6 (Ser240/244)**

---

Run on same gel, **Actin** was used as the loading control (see uncropped gel image)

Parallel gel 3

**TSC1 (P38)                      p-S6 (Ser235/236) (P38)**

---

Run on same gel, **Actin** was used as the loading control (see uncropped gel image)

Parallel gel 4

**4E-BP1(P35, P38)**

---

Run on same gel, **4E-BP1** was used as the loading control , no extra loading control needed)

Parallel gel 5

**p-S6 (Ser235/236) (P35)**

---

Run on same gel, **Actin** was used as the loading control (see uncropped gel image)

**Figure 7**

Full unedited gel for Figure 7D

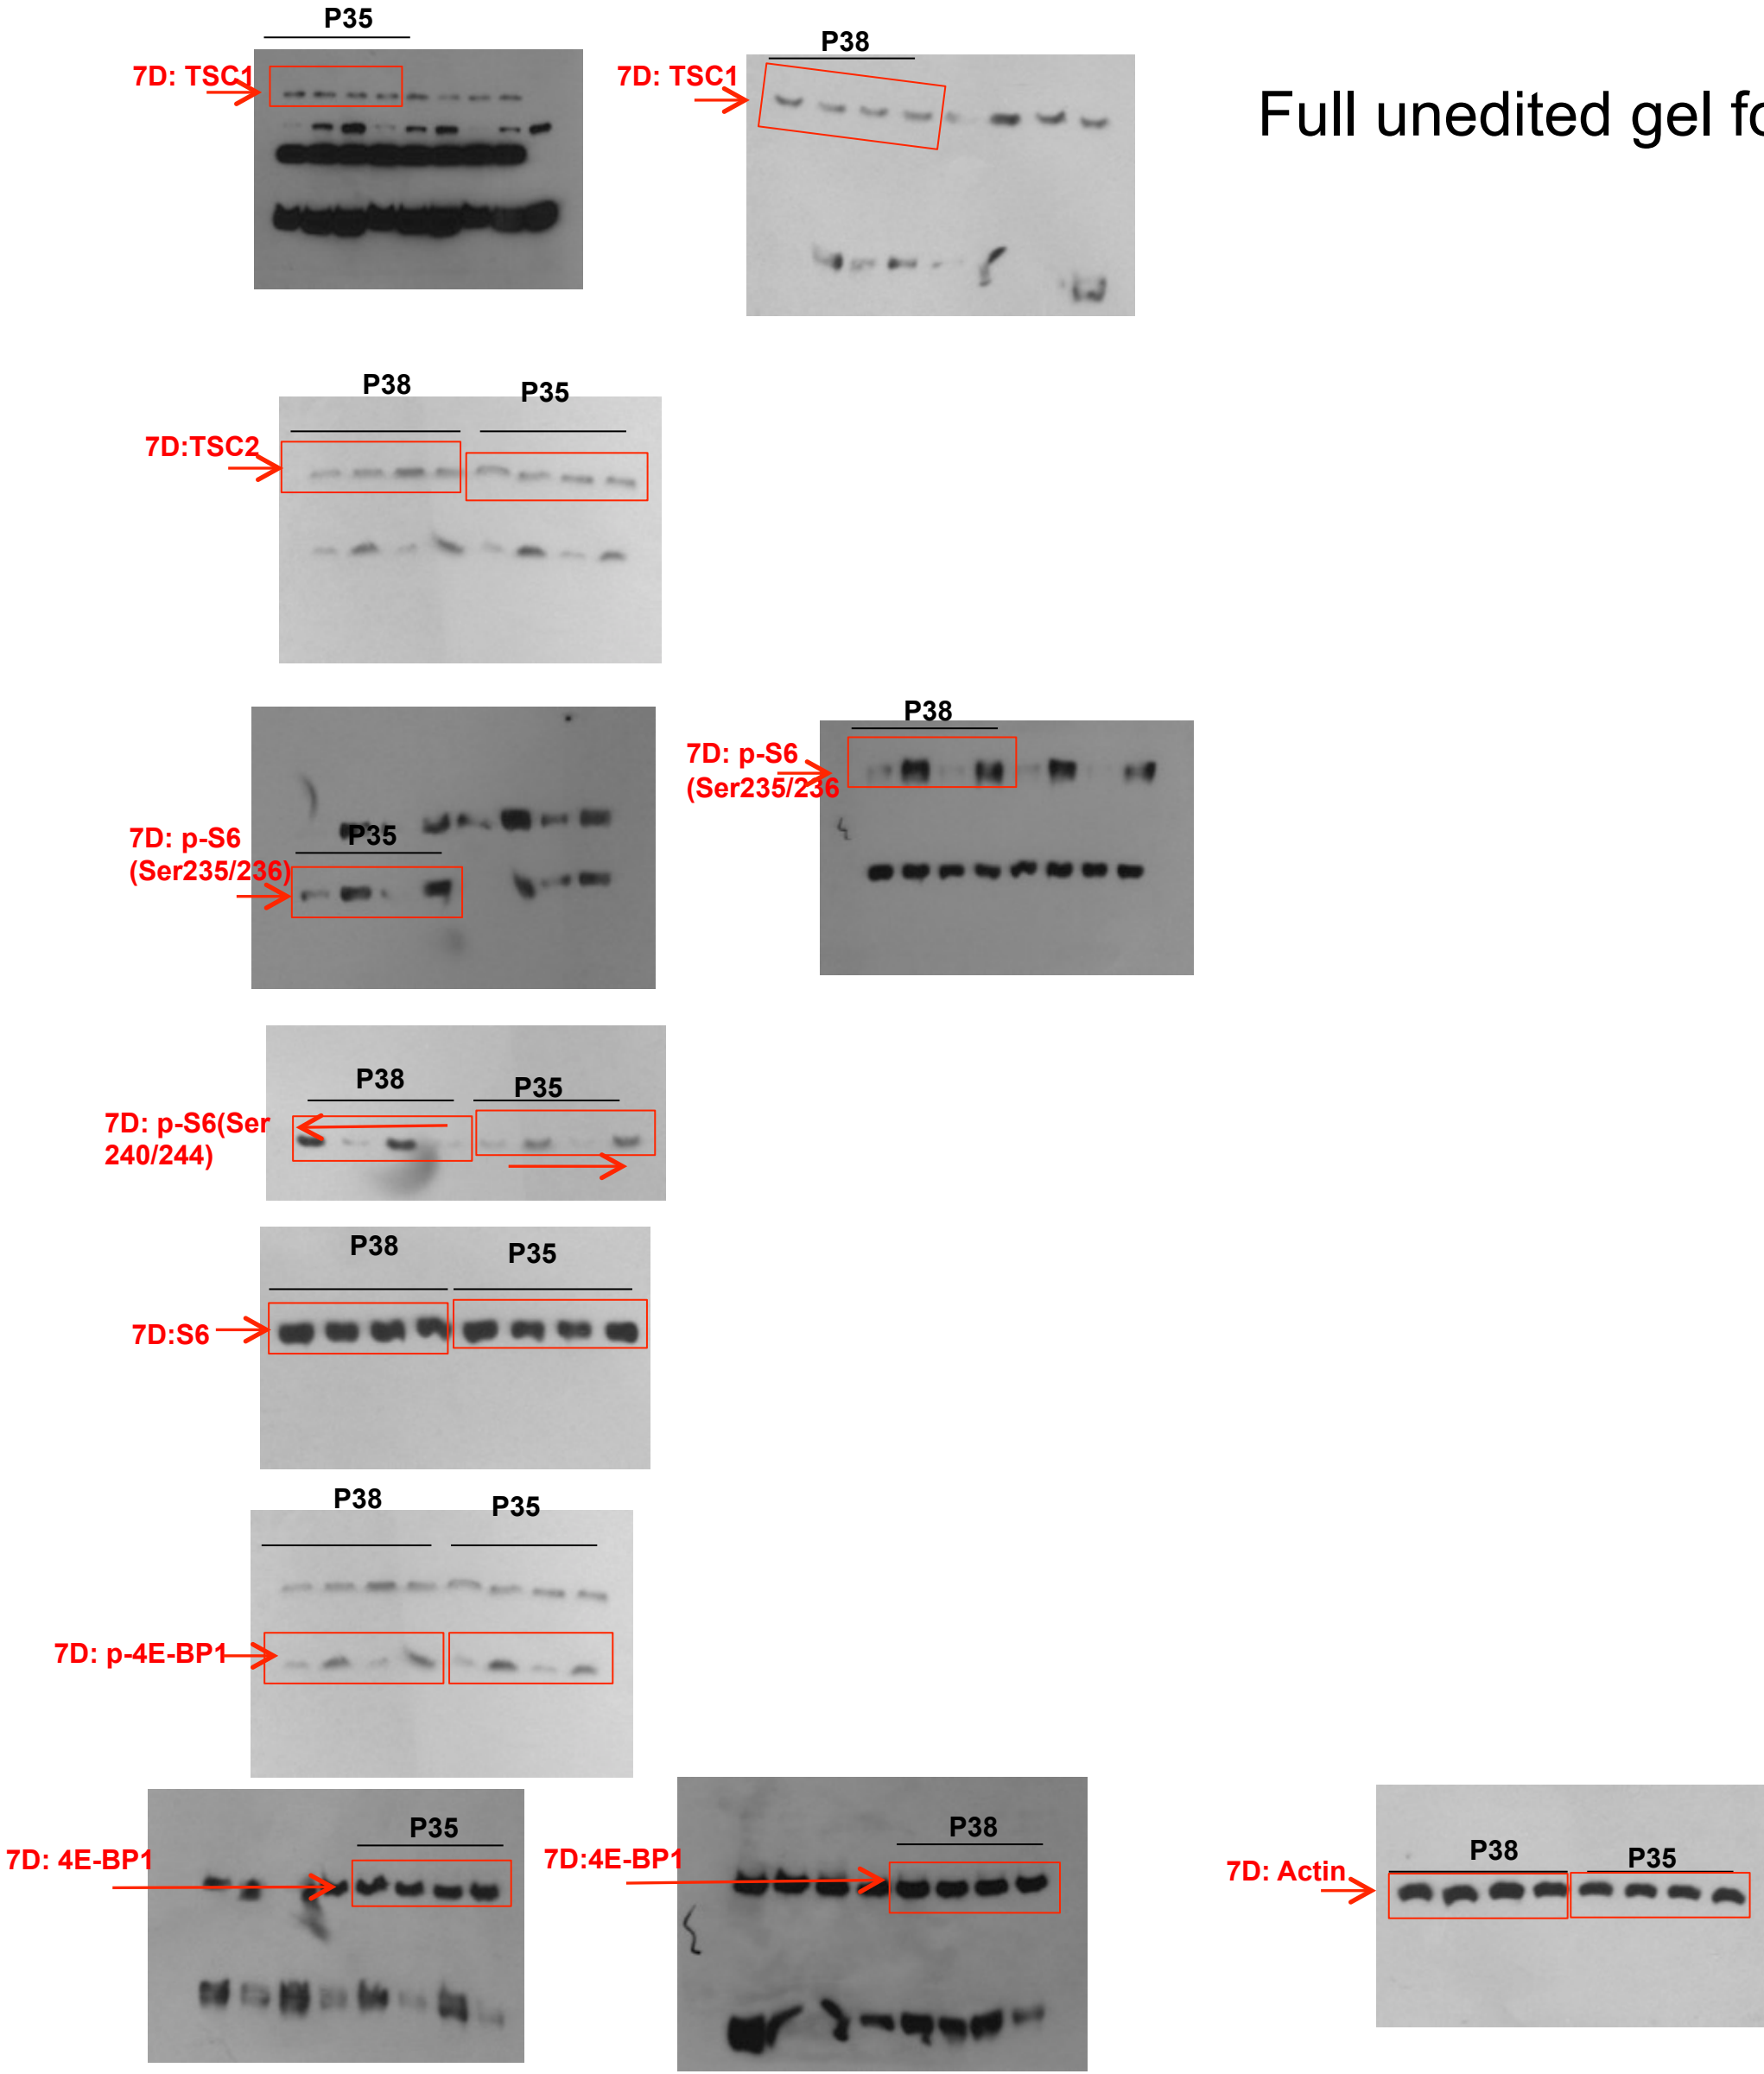

Figure 6



# Loading controls for parallel gels in figure 7D

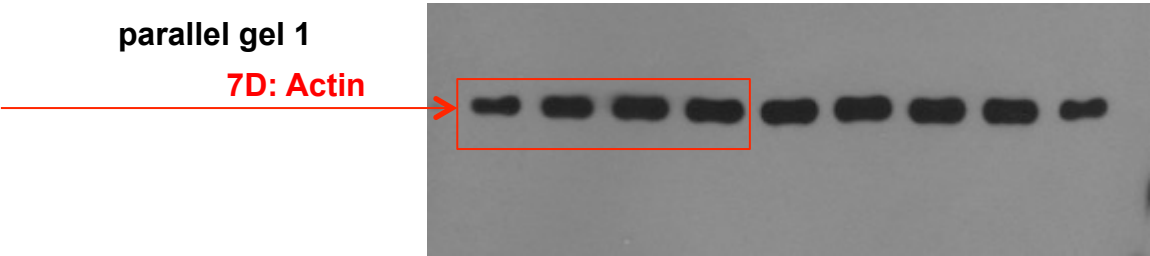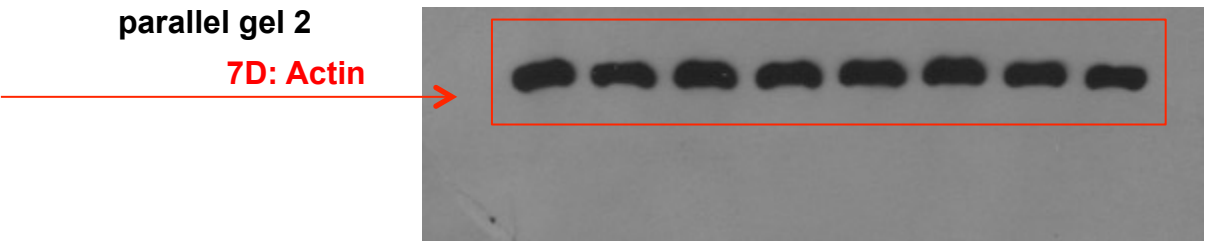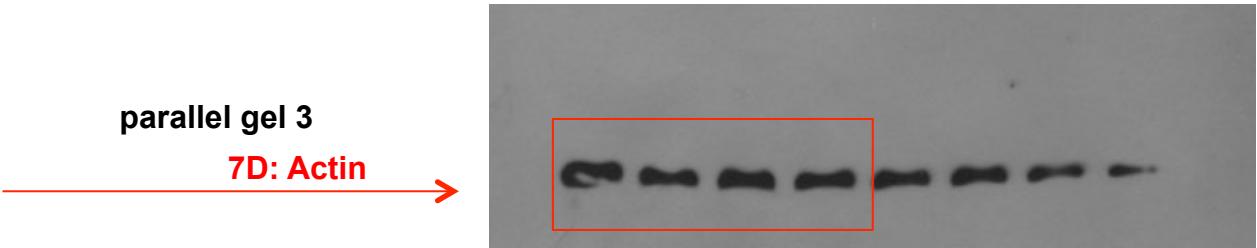

parallel gel 4

7D: Actin

No extra loading control needed

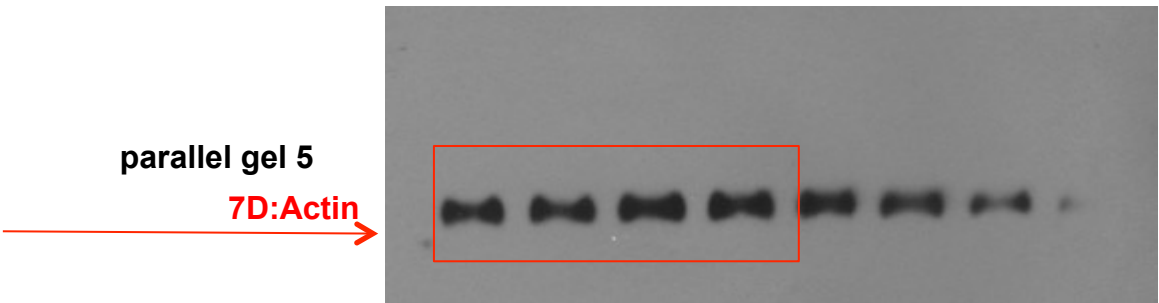

## Full unedited gels for supplemental figures

Note: for all gels, blots were cut for different antibody staining and exposed on the same film

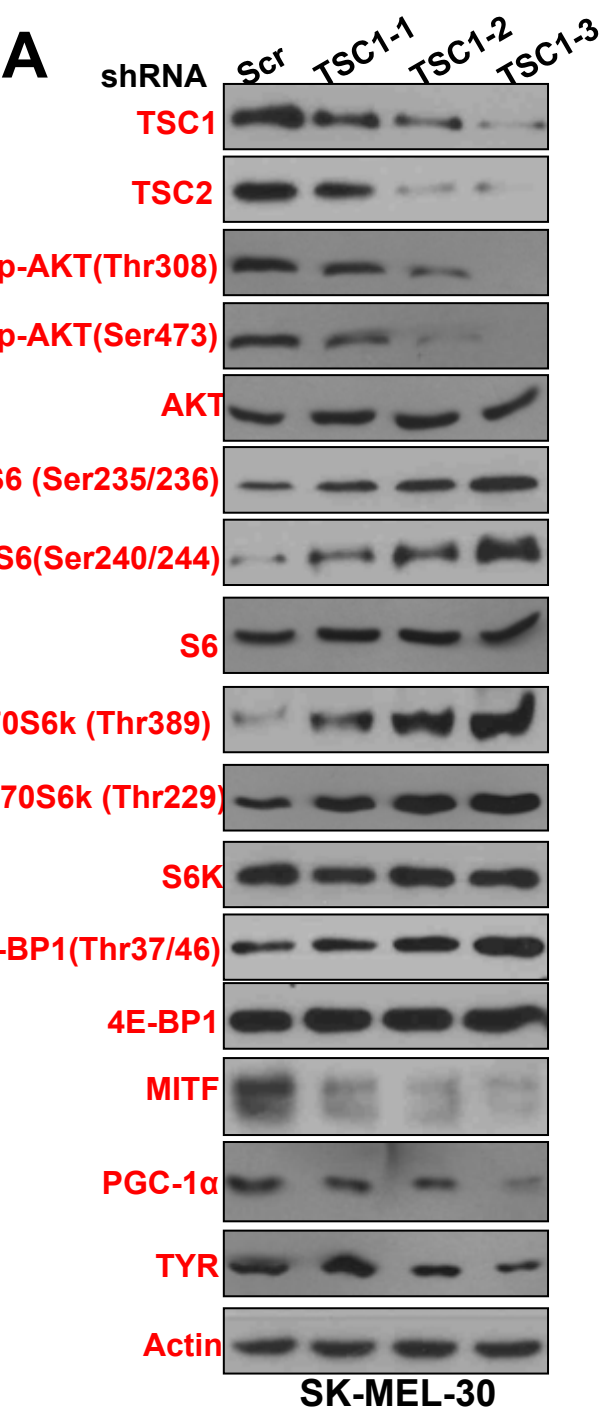

TSC1    TSC2    p-S6(Ser240/244)    S6K    p-4E-BP1(Thr37/46) 4E-BP1 MITF    Actin

Run on same gel, **Actin** in the figure was used as the loading control

p-AKT(Thr308)    p-AKT(Ser473)    AKT    S6    PGC-1α    TYR

Run on same gel, **AKT** in the figure was used as the loading control

parallel gel 1

p-S6 (Ser235/236)    p-P70S6k (Thr389)

Run on same gel, **Actin** was used as the loading control (see uncropped gel image)

parallel gel 2

p-P70S6k (Thr229)

Run on same gel, **Actin** was used as the loading control (see uncropped gel image)

Figure S1

A

## Full unedited gel for Figure S1A

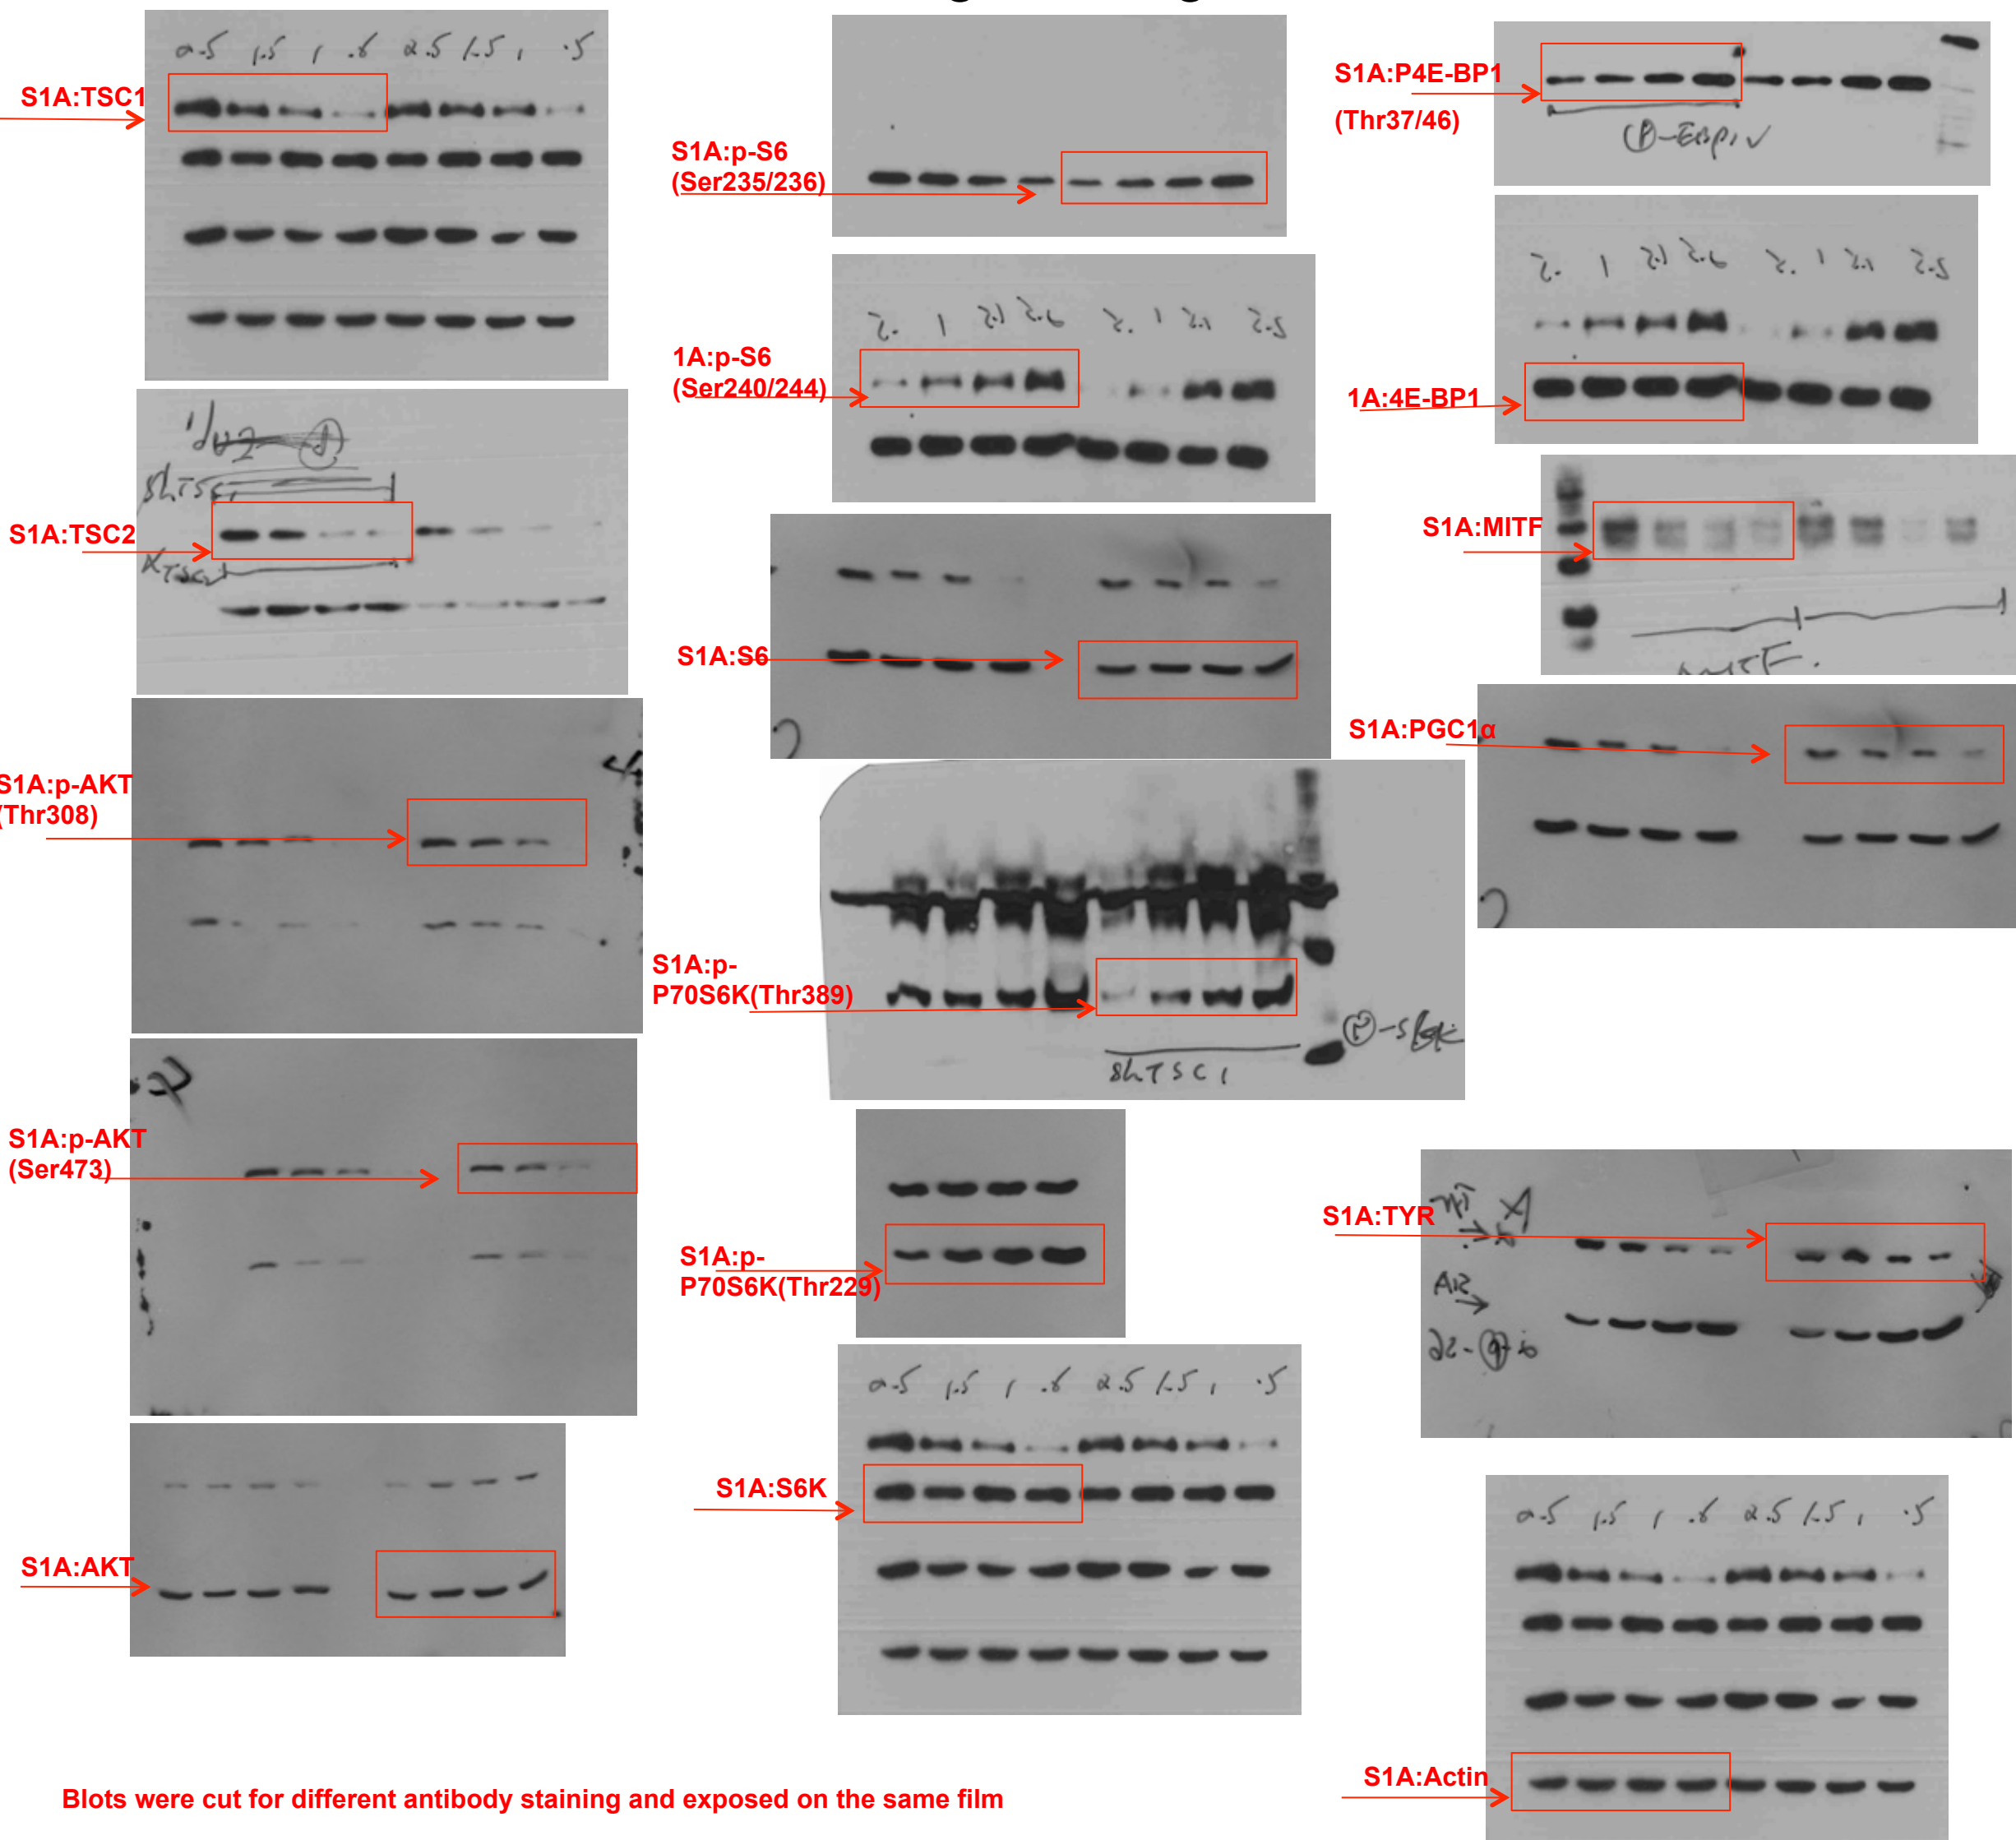

Figure S1

# Loading controls for parallel gels in figure S1A

parallel gel 1

S1A:Actin

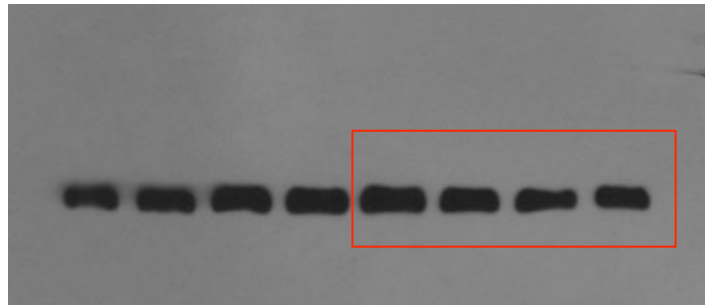

parallel gel 2

S1A:Actin

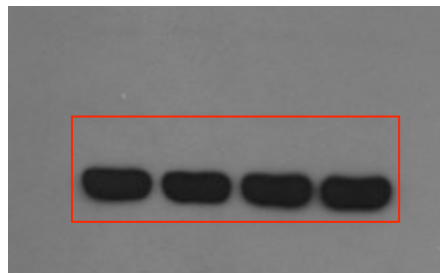

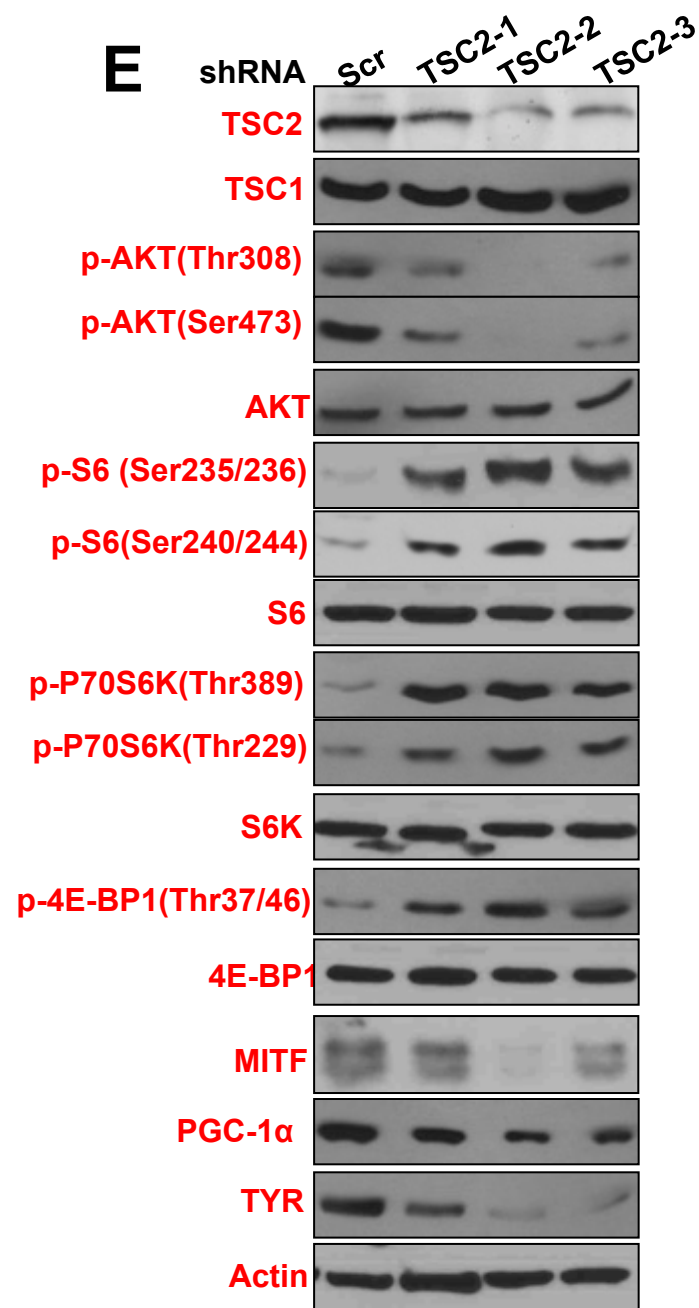

p-S6 (Ser235/236)    S6    4E-BP1    Actin    S6K

Run on same gel, **Actin** in the figure was used as the loading control

TSC1    p-AKT(Thr308)    p-AKT(Ser473)    AKT    p-P70S6K(Thr229)    p-4E-BP1(Thr37/46)    PGC-1α    TYR

Run on same gel, **AKT** in the figure was used as the loading control

parallel gel 1

**TSC2**

Run on same gel, **Actin** was used as the loading control (see uncropped gel image)

parallel gel 2

**p-S6(Ser240/244)**

Run on same gel, **Actin** was used as the loading control (see uncropped gel image)

parallel gel 3

**p-P70S6K(Thr389)**

Run on same gel, **Actin** was used as the loading control (see uncropped gel image)

parallel gel 4

**MITF**

Run on same gel, **Actin** was used as the loading control (see uncropped gel image)

Figure S1

# E Full unedited gel for Figure S1E

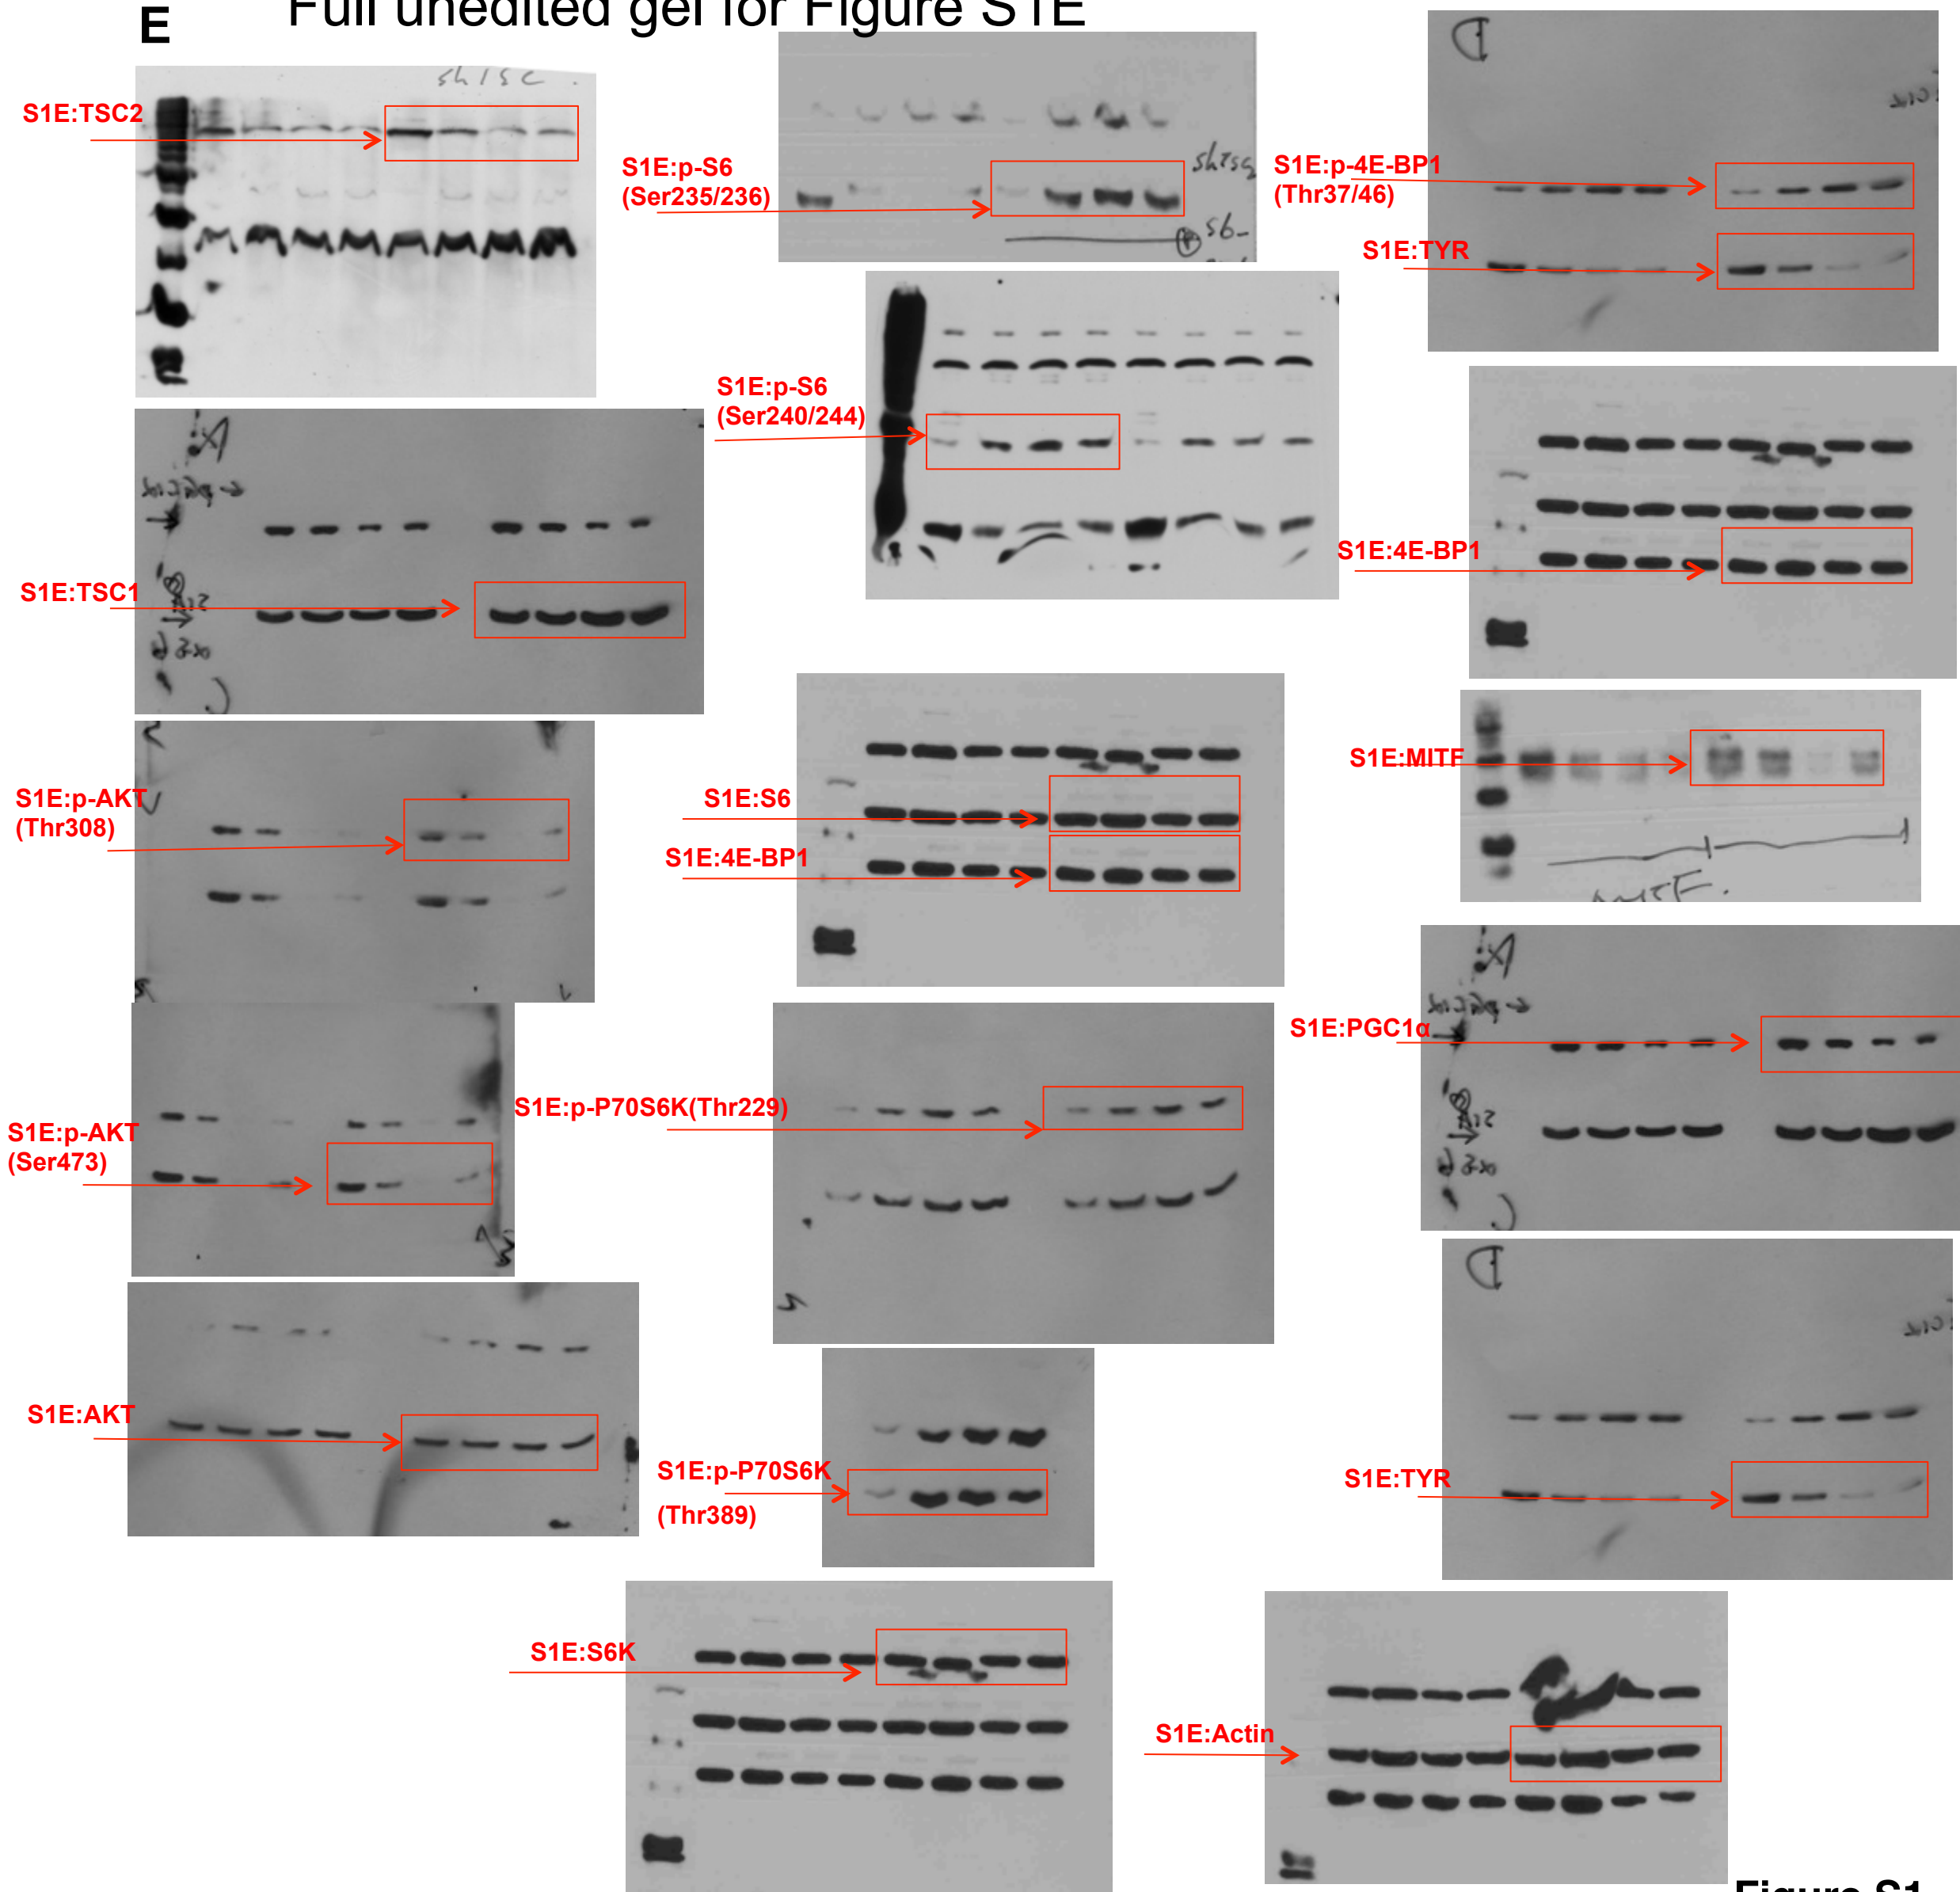

Blots were cut for different antibody staining and exposed on the same film

Figure S1

Loading controls for parallel gels in figure S1E

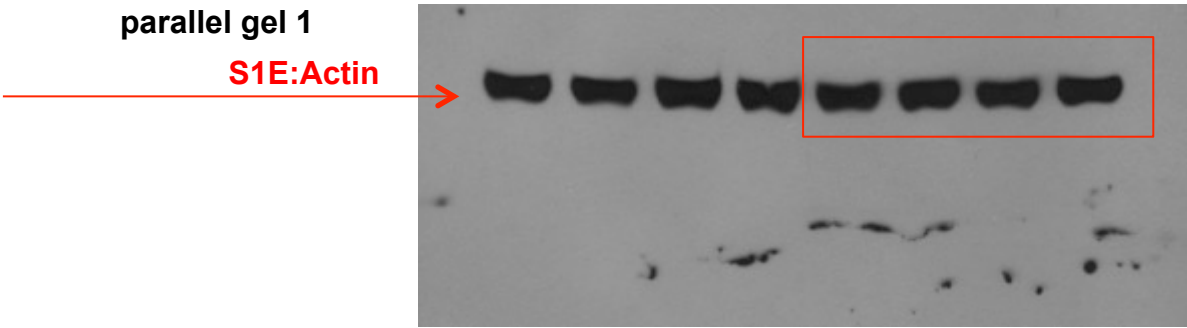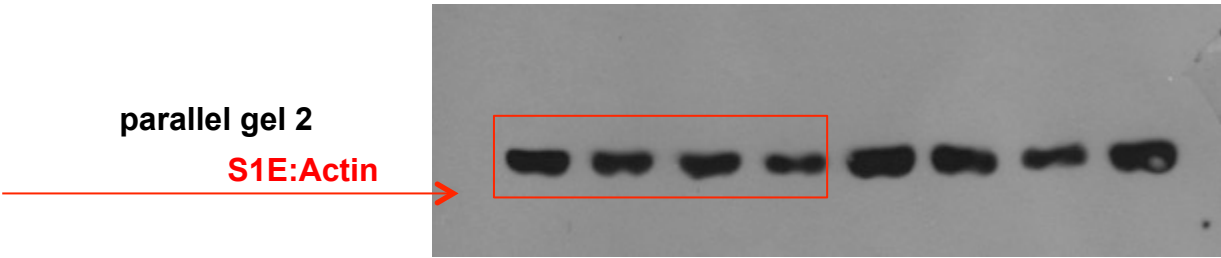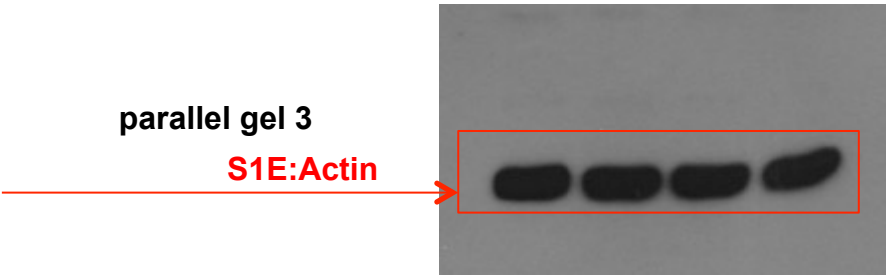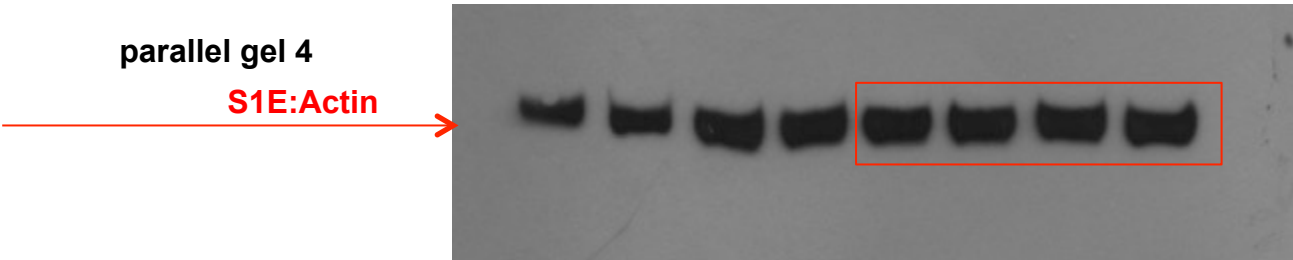



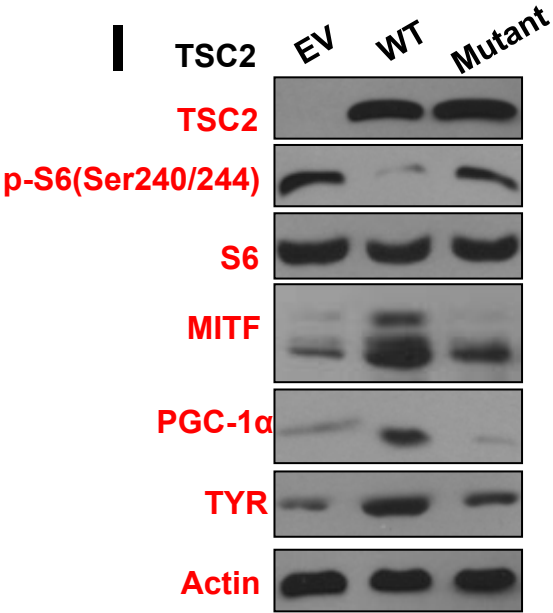

**TSC2**      **MITF**      **Actin**

---

Run on same gel, **Actin** in the figure was used as the loading control

parallel gel 1

**p-S6(Ser240/244)**      **PGC-1α**

---

Run on same gel, **Actin** was used as the loading control (see uncropped gel image)

parallel gel 2

**S6**      **TYR**

---

Run on same gel, **S6** in the figure was used as the loading control, no extra loading control needed

**Figure S1**

# Full unedited gel for Figure S1I

For all gels, Blots were cut for different antibody staining and exposed on the same film

I

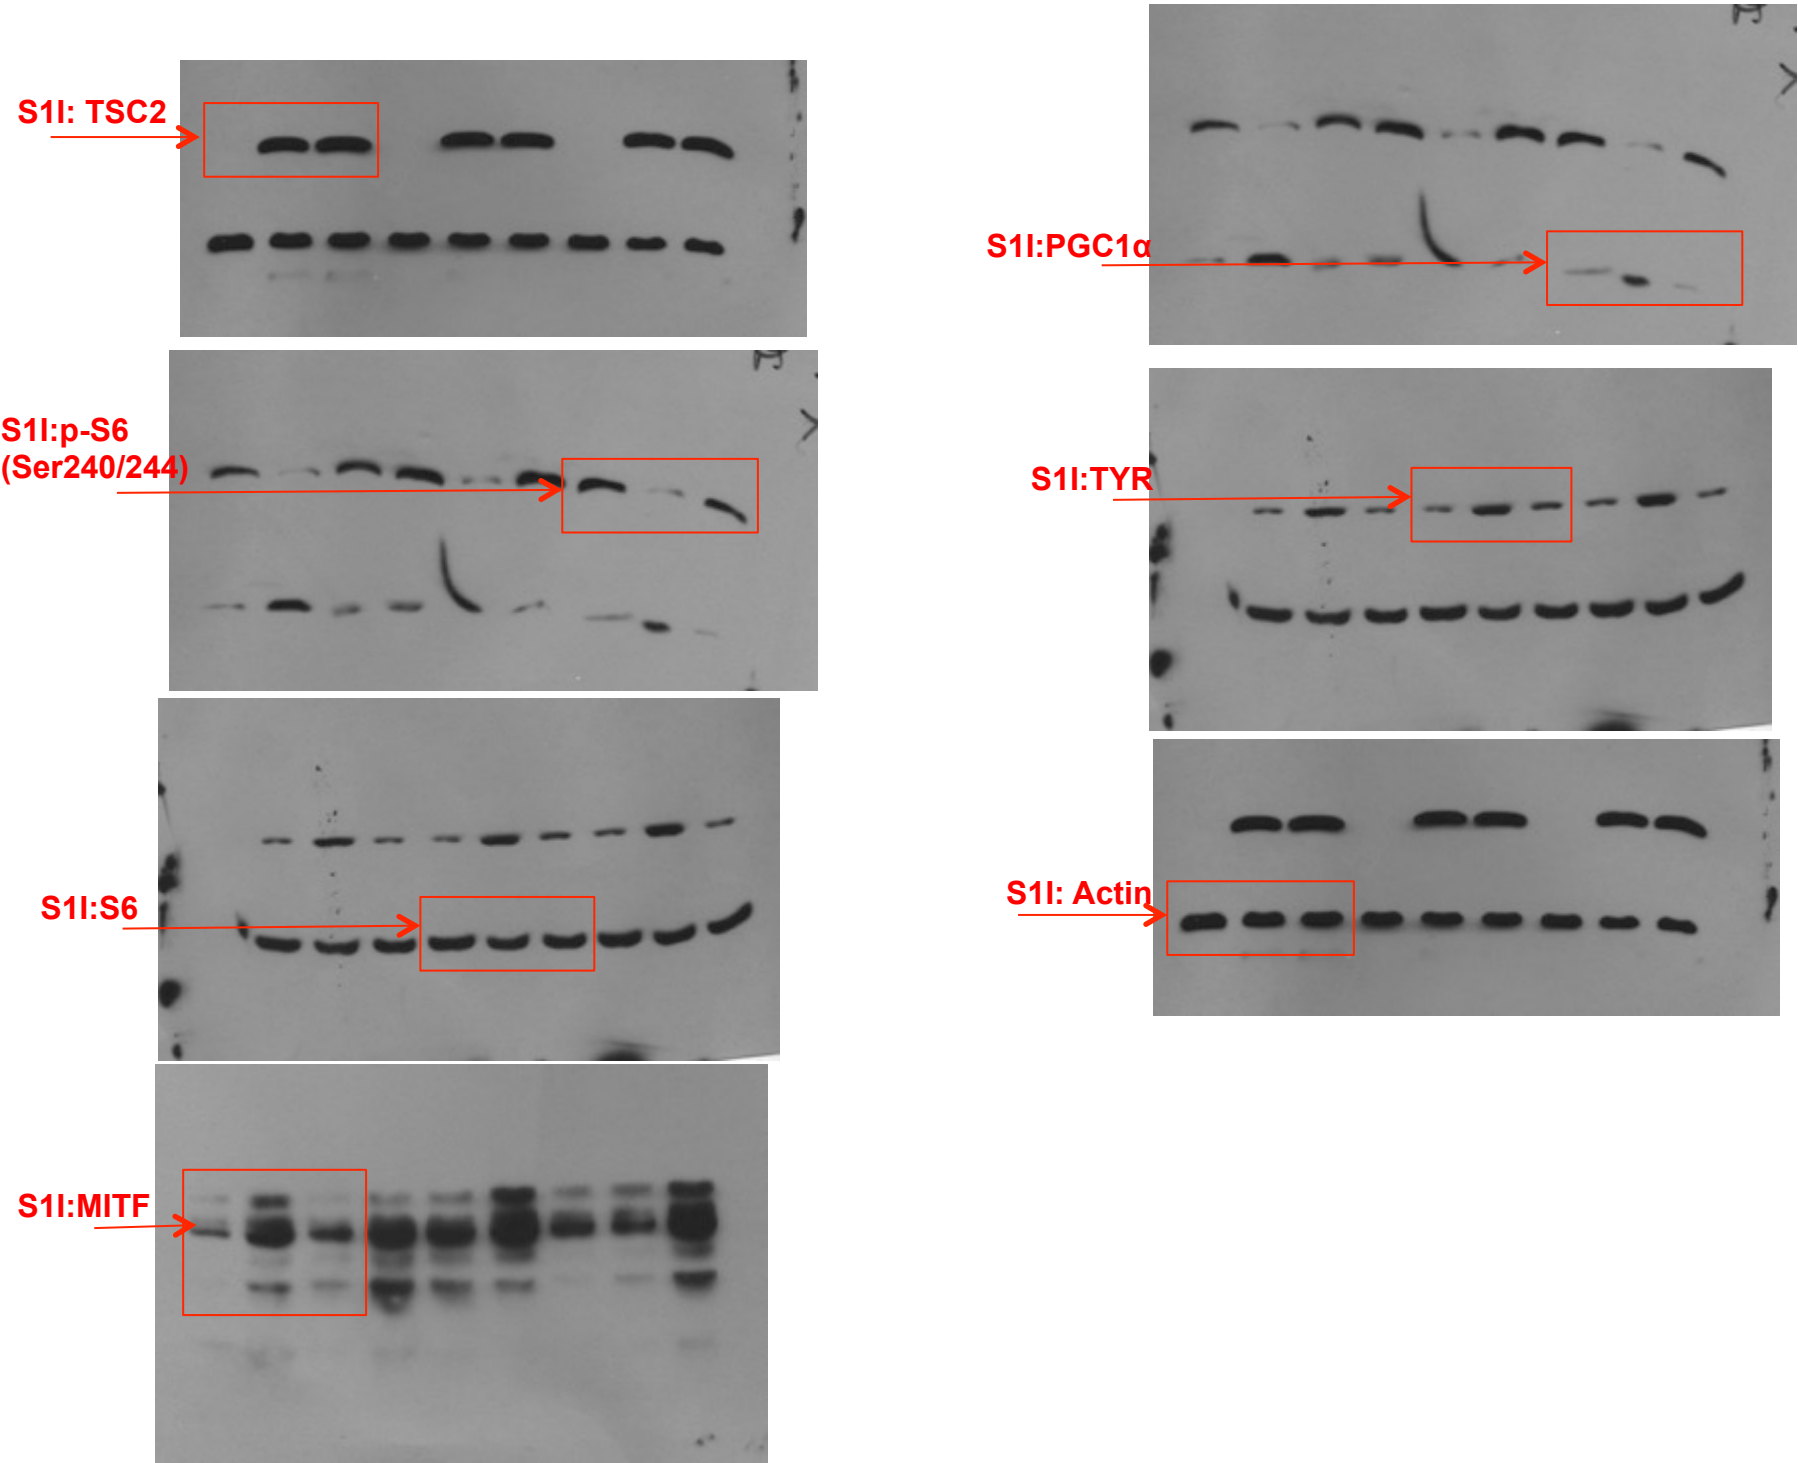

Figure S1

# Loading controls for parallel gels in figure S1I

parallel gel 1

S1I:Actin

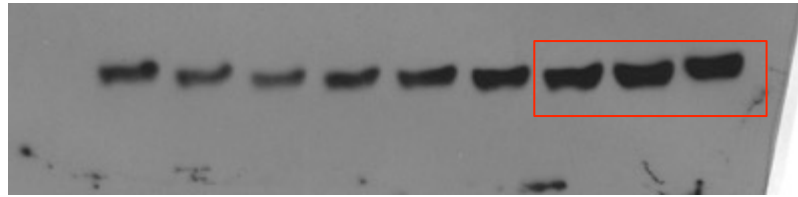

parallel gel

S1I:

No extra loading control needed

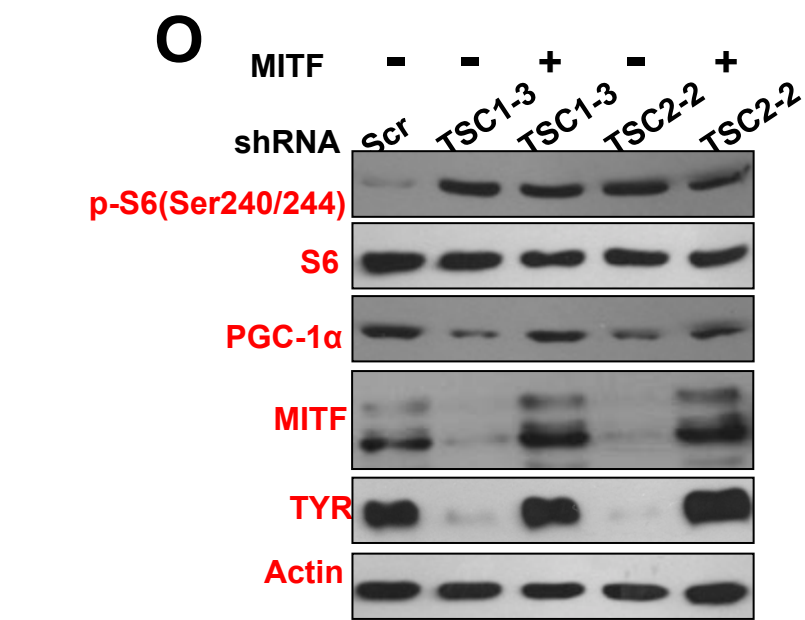

p-S6(Ser240/244) S6 PGC-1α Actin

Run on same gel, **Actin** in the figure was used as the loading control

parallel gel 1

MITF

Run on same gel, **Actin** was used as the loading control (see uncropped gel image)

parallel gel 2

TYR

Run on same gel, **Actin** was used as the loading control (see uncropped gel image)

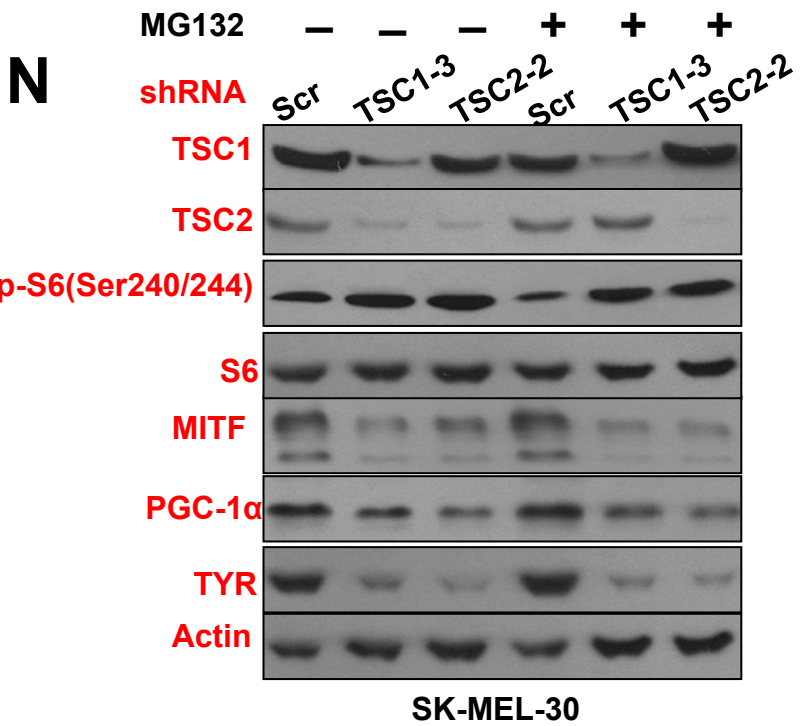

p-S6(Ser240/244) S6 TYR Actin

Run on same gel, **Actin** in the figure was used as the loading control

parallel gel 1

TSC1 TSC2 MITF PGC-1α

Run on same gel, **Actin** was used as the loading control (see uncropped gel image)

Figure S1

# O Full unedited gel for Figure S1O

Blots were cut for different antibody staining and exposed on the same film

S1O: p-S6  
(Ser240/244)

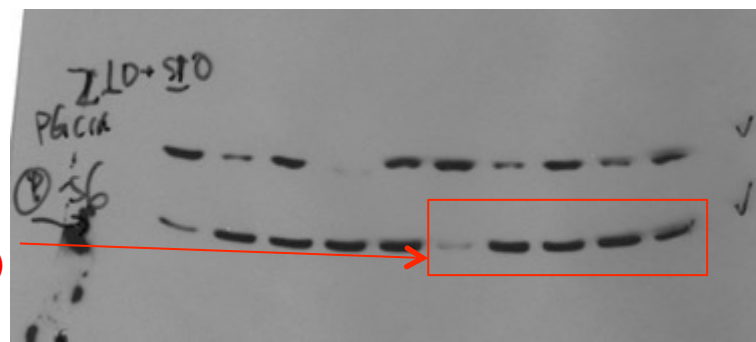

S1O:PGC1a

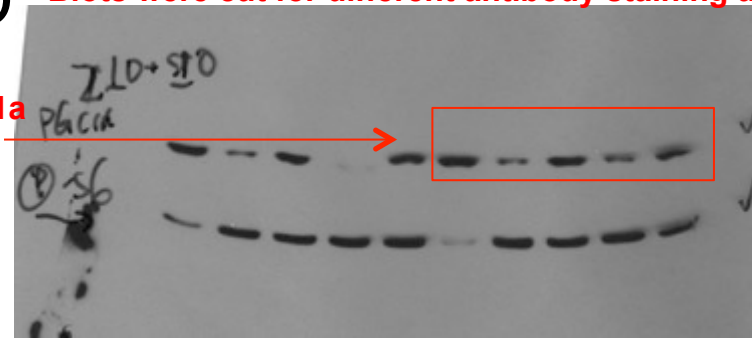

S1O:Actin

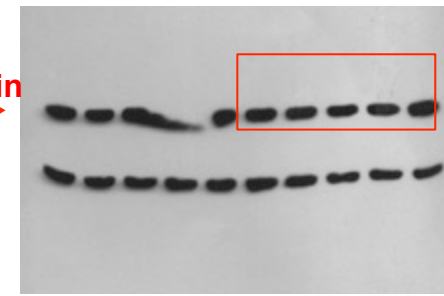

S1O: S6

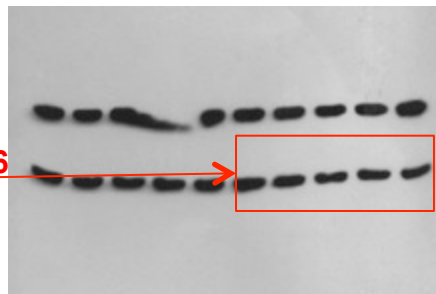

S1O:MITF

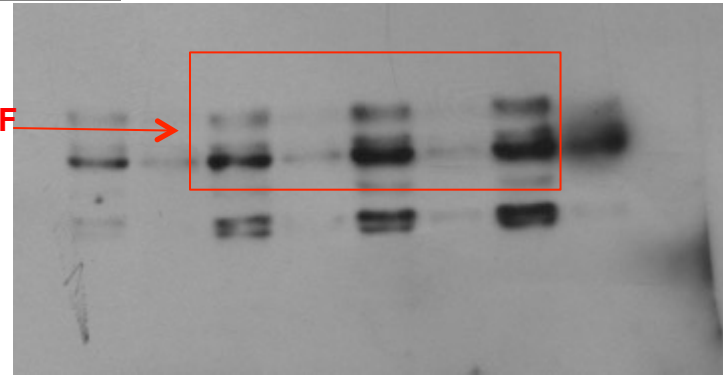

S1O:TYR

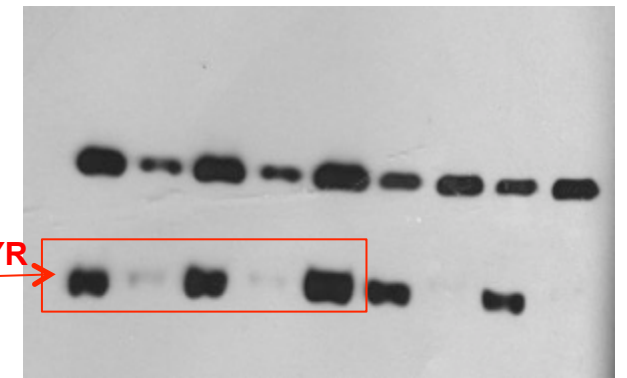

# N Full unedited gel for Figure S1N

Blots were cut for different antibody staining and exposed on the same film

S1N: TSC1

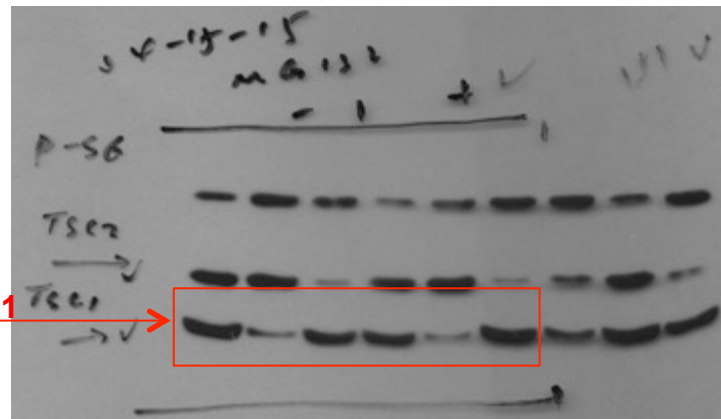

S1N: MITF

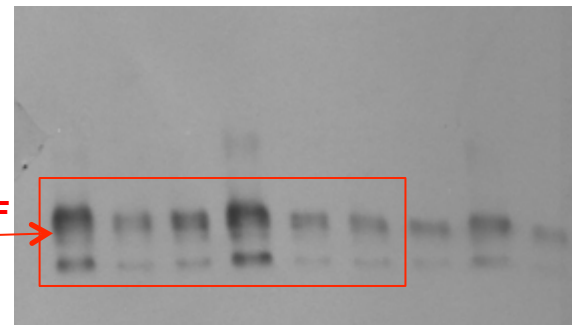

S1N: TSC2

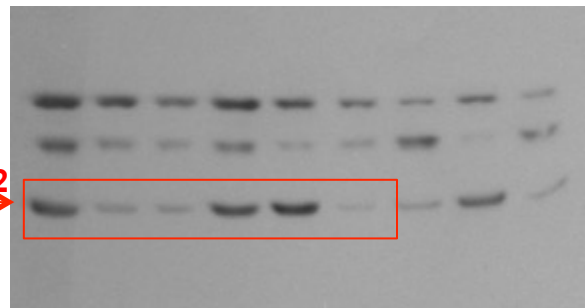

S1N: PGC-1a

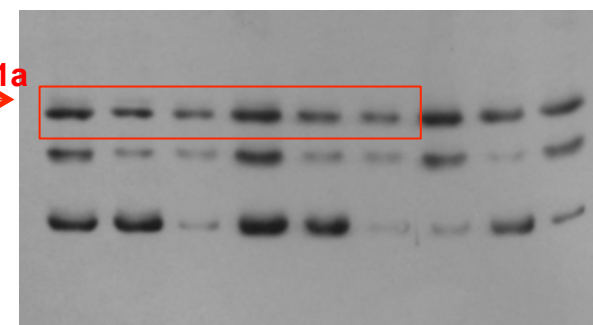

S1N: p-S6  
(Ser240/244)

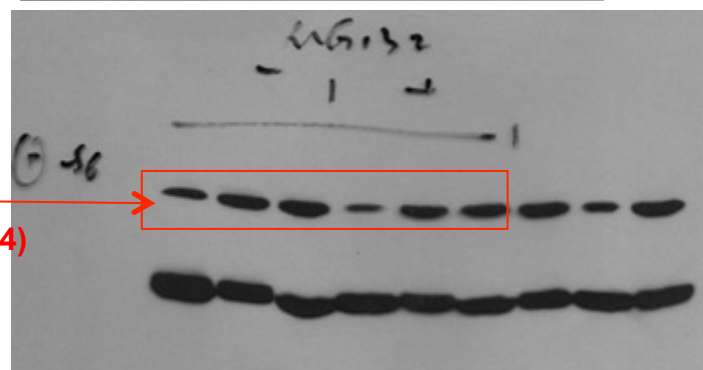

S1N:TYR

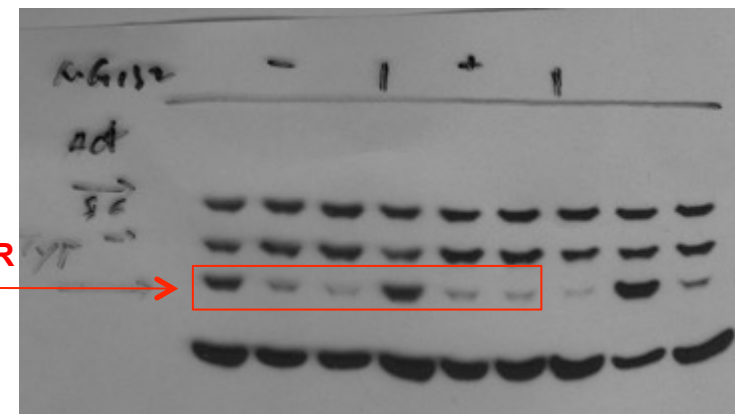

S1N:S6

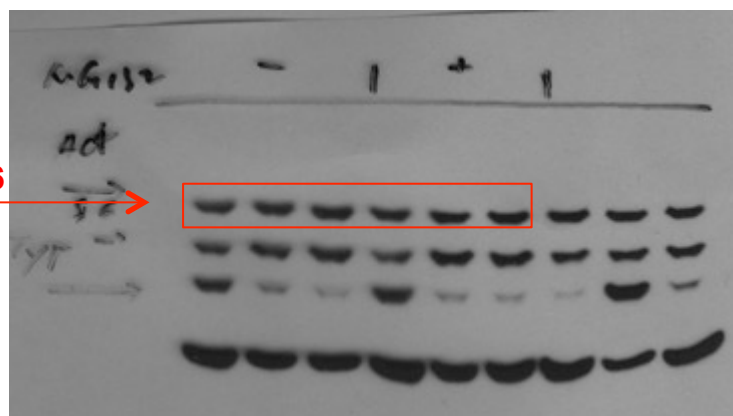

S1N:Actin

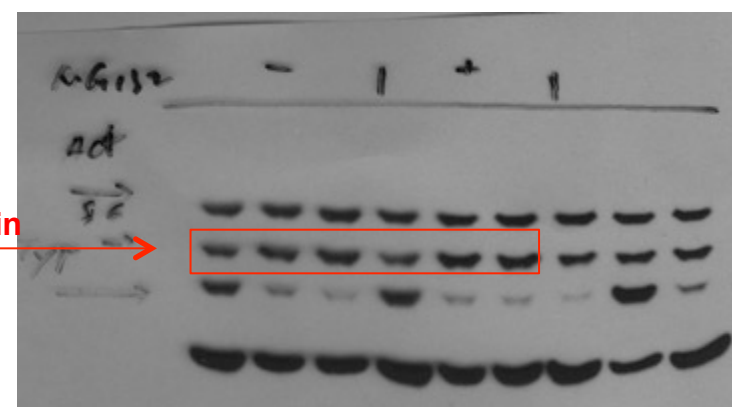

Figure S1

# Loading controls for parallel gels in figure S1O

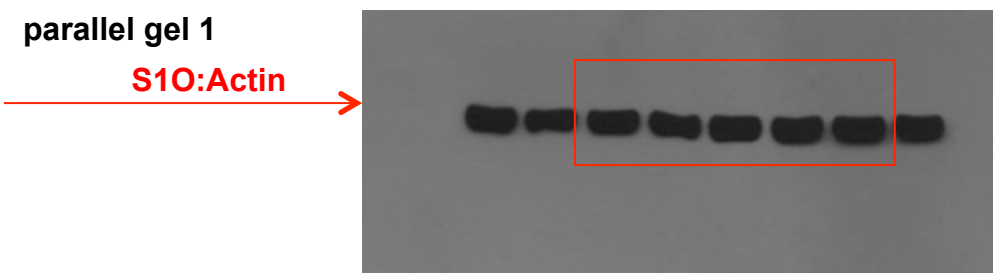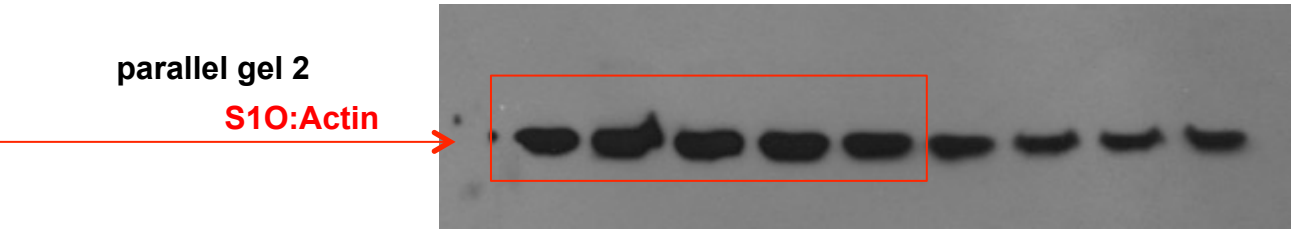

# Loading controls for parallel gels in figure S1N

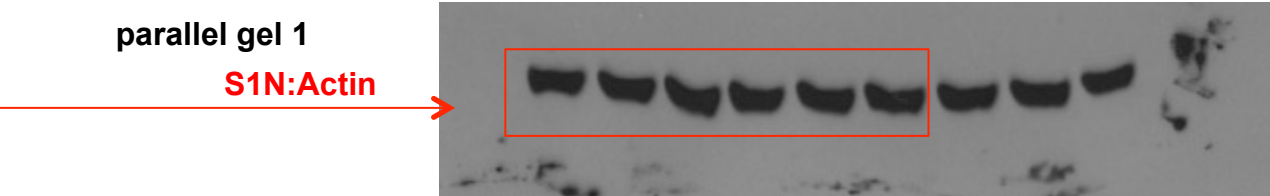

A

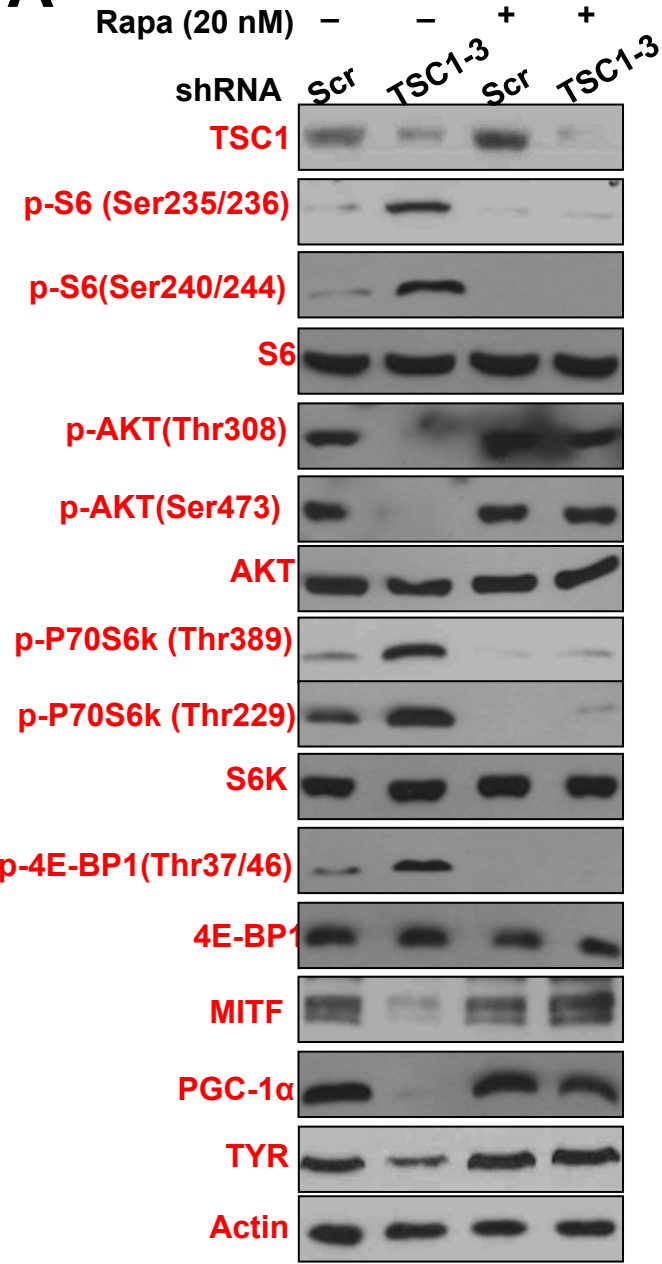

p-S6 (Ser235/236) p-P70S6k (Thr389) Actin

Run on same gel, **Actin** in the figure was used as the loading control

parallel gel 1

TSC1

Run on same gel, **Actin** was used as the loading control (see uncropped gel image)

parallel gel 2

p-S6(Ser240/244) p-AKT(Thr308) p-AKT(Ser473) p-4E-BP1(Thr37/46)

Run on same gel, **Actin** was used as the loading control (see uncropped gel image)

parallel gel 3

MITF TYR

Run on same gel, **Actin** was used as the loading control (see uncropped gel image)

parallel gel 4

S6 AKT p-P70S6k (Thr229) S6K 4E-BP1 PGC-1α

Run on same gel, **AKT** was used as the loading control. No extra loading control needed

Figure S2



# Full unedited gel for Figure S2A

**A**

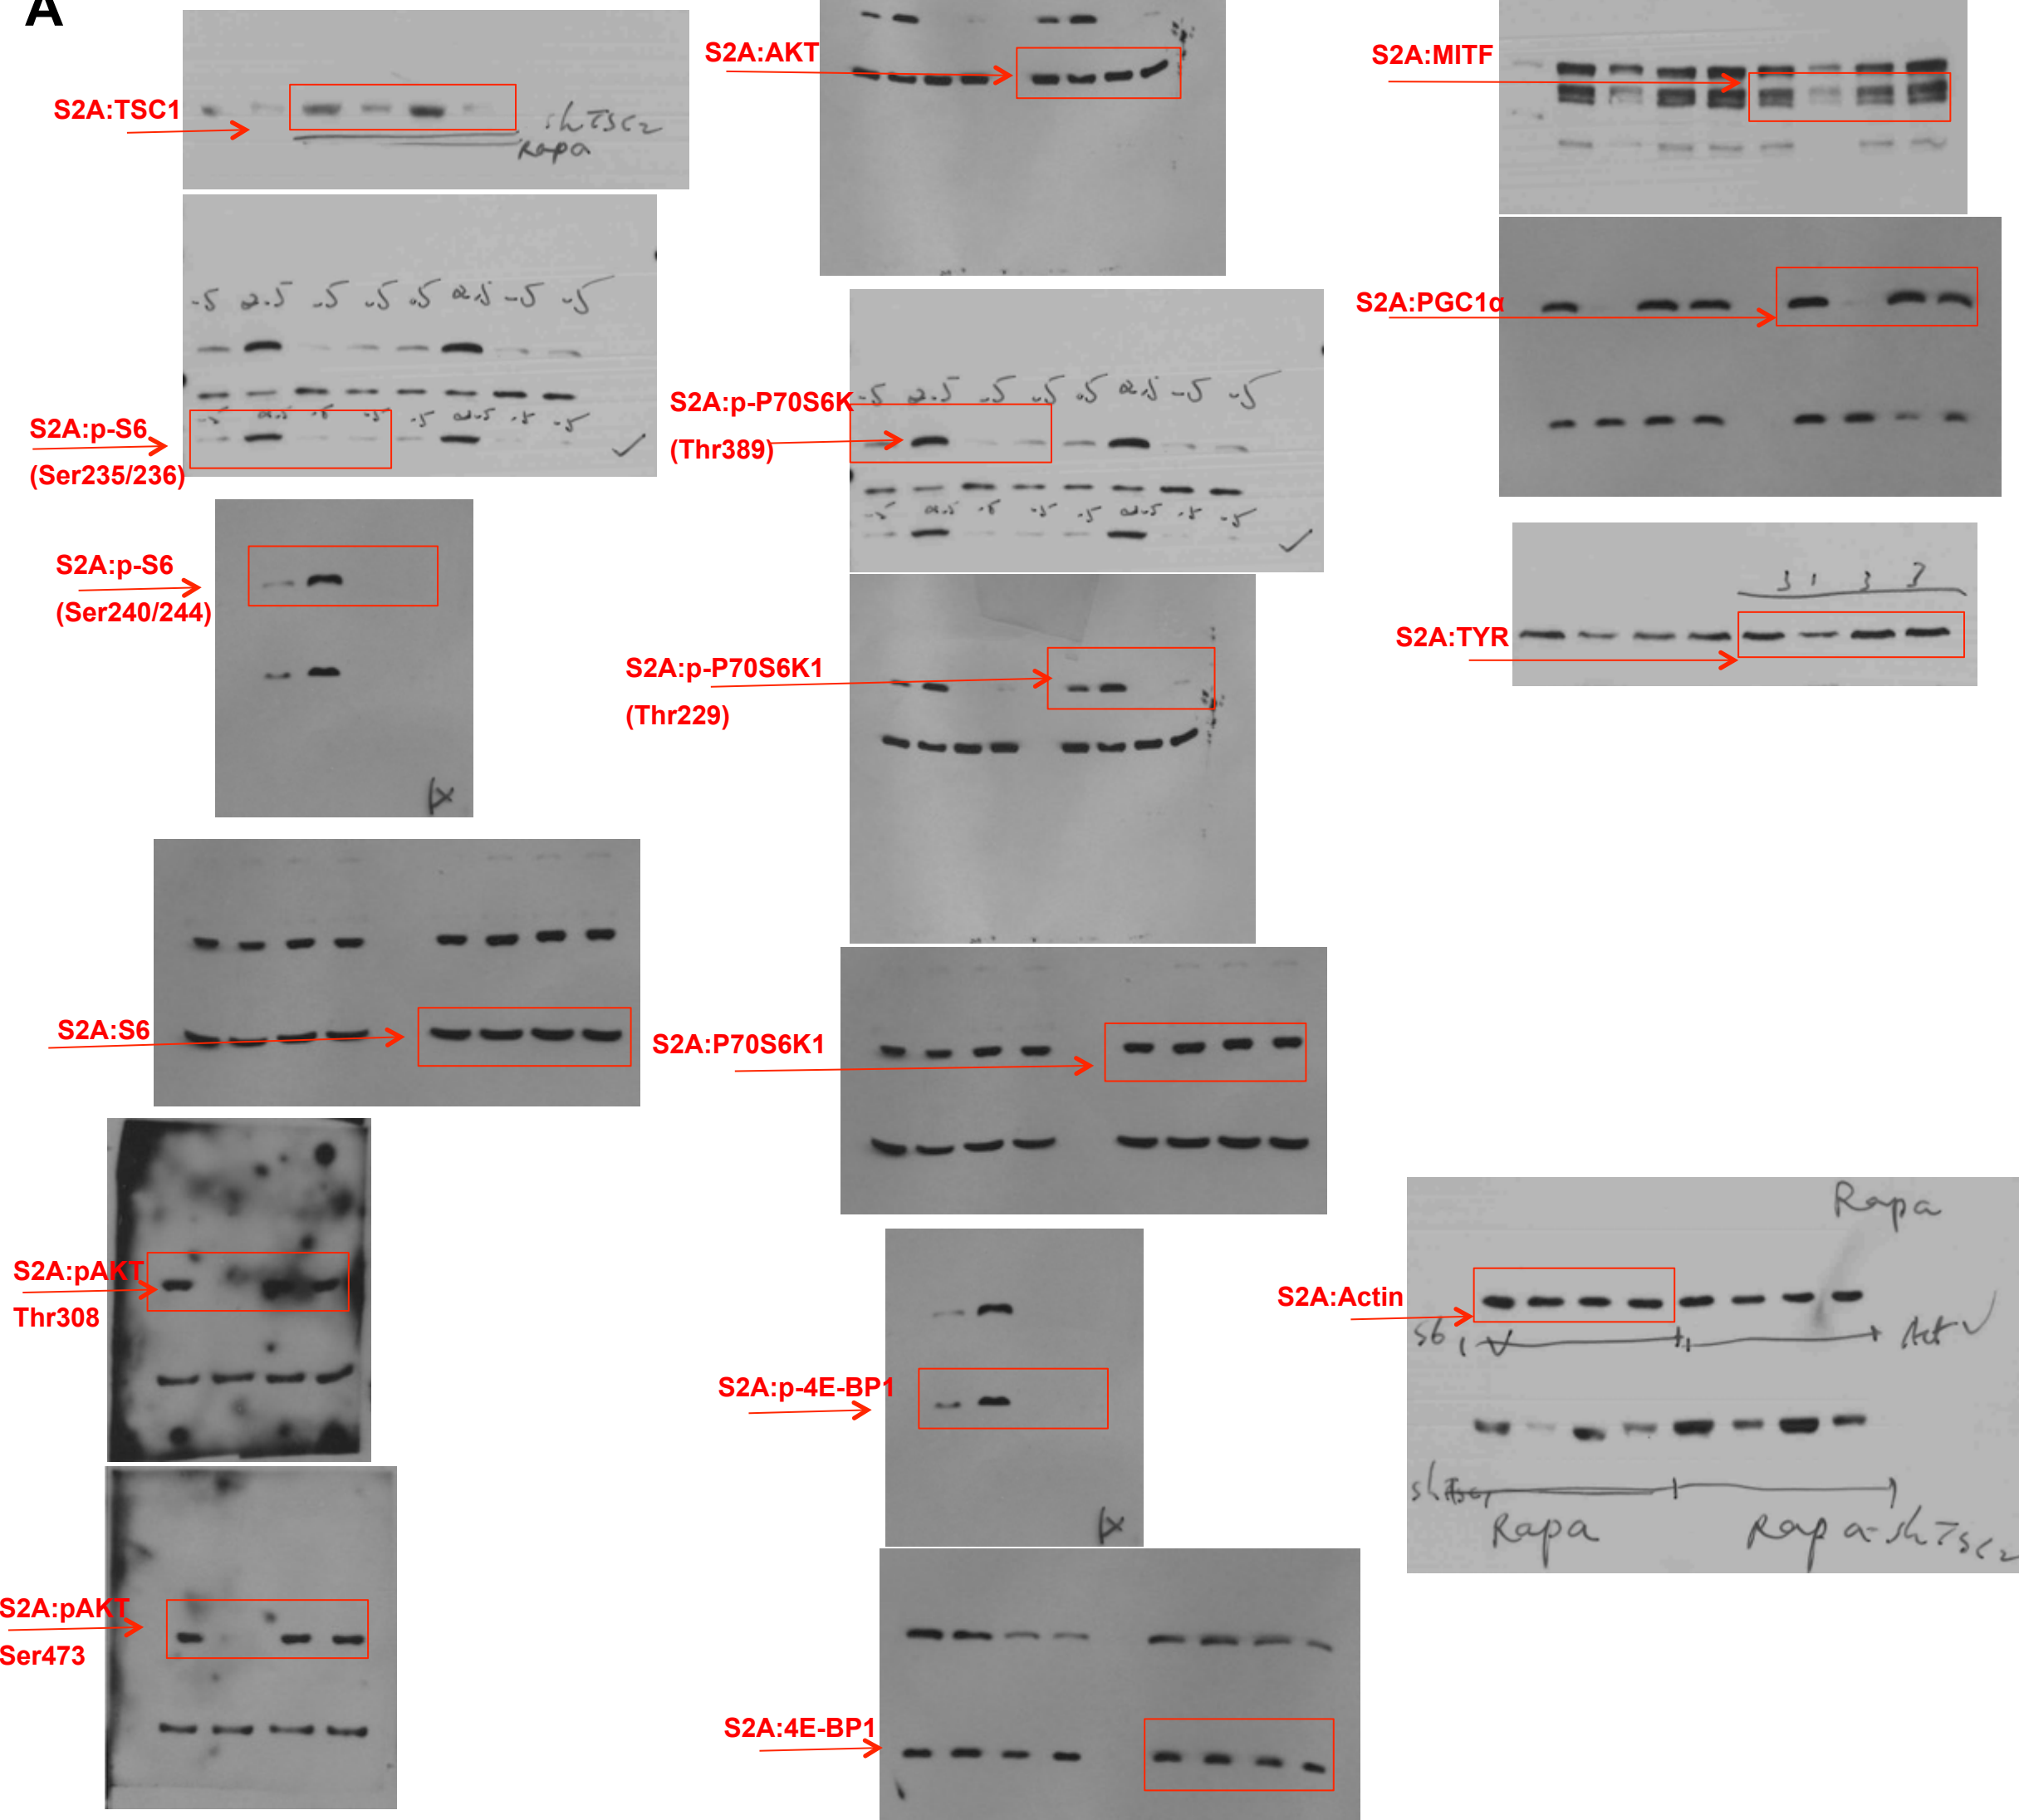

Blots were cut for different antibody staining and exposed on the same film

**Figure S2**



# Loading controls for parallel gels in figure S2A

parallel gel 1

S2A:Actin

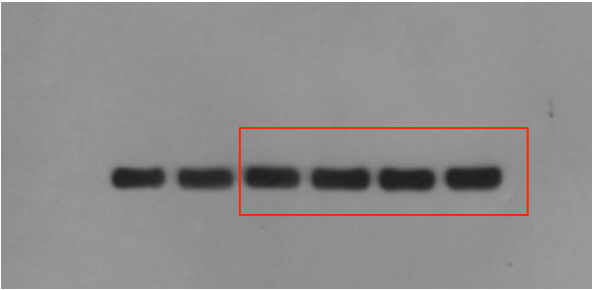

parallel gel 2

S2A:Actin

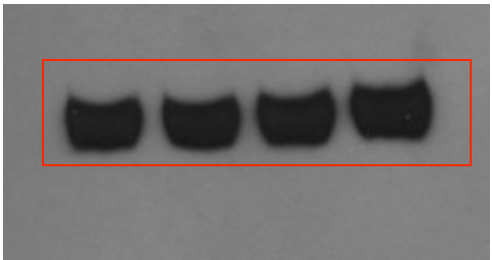

parallel gel 3

S2A:Actin

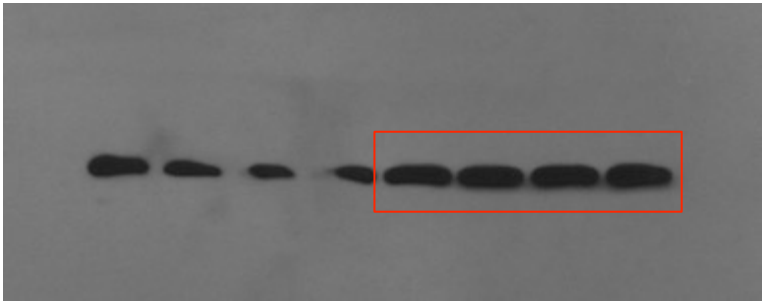

parallel gel 4

S2A

No extra loading control needed

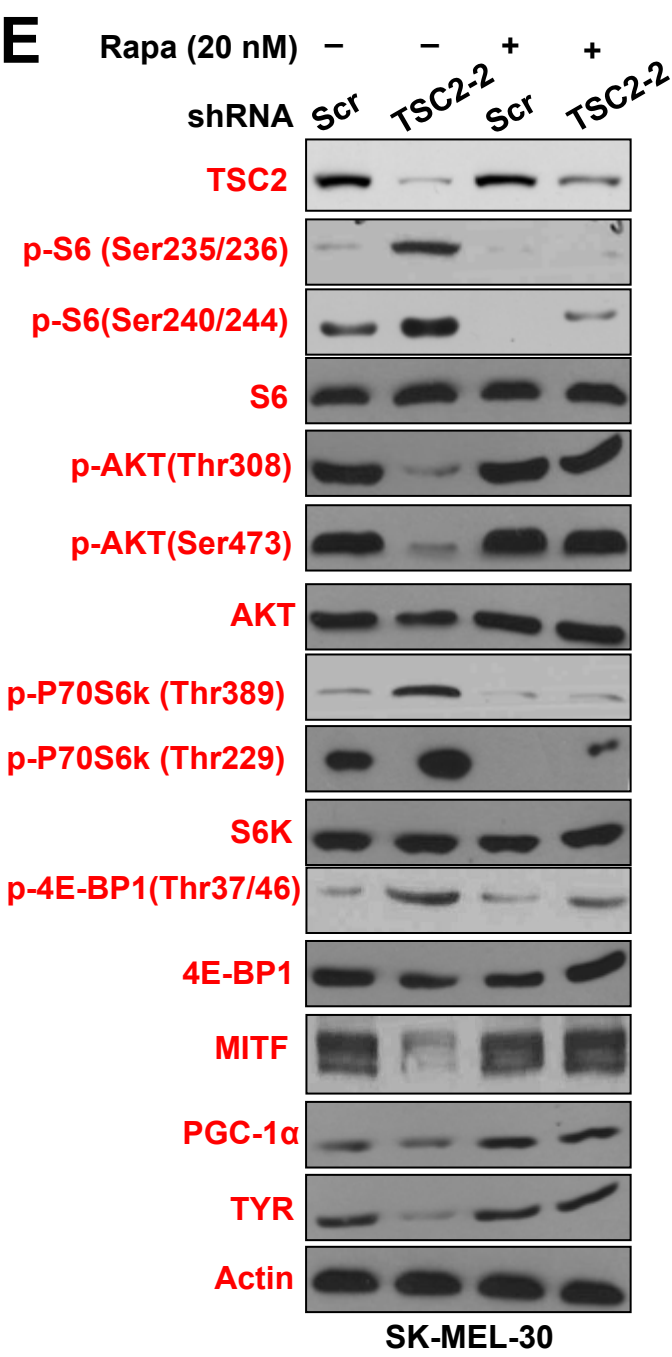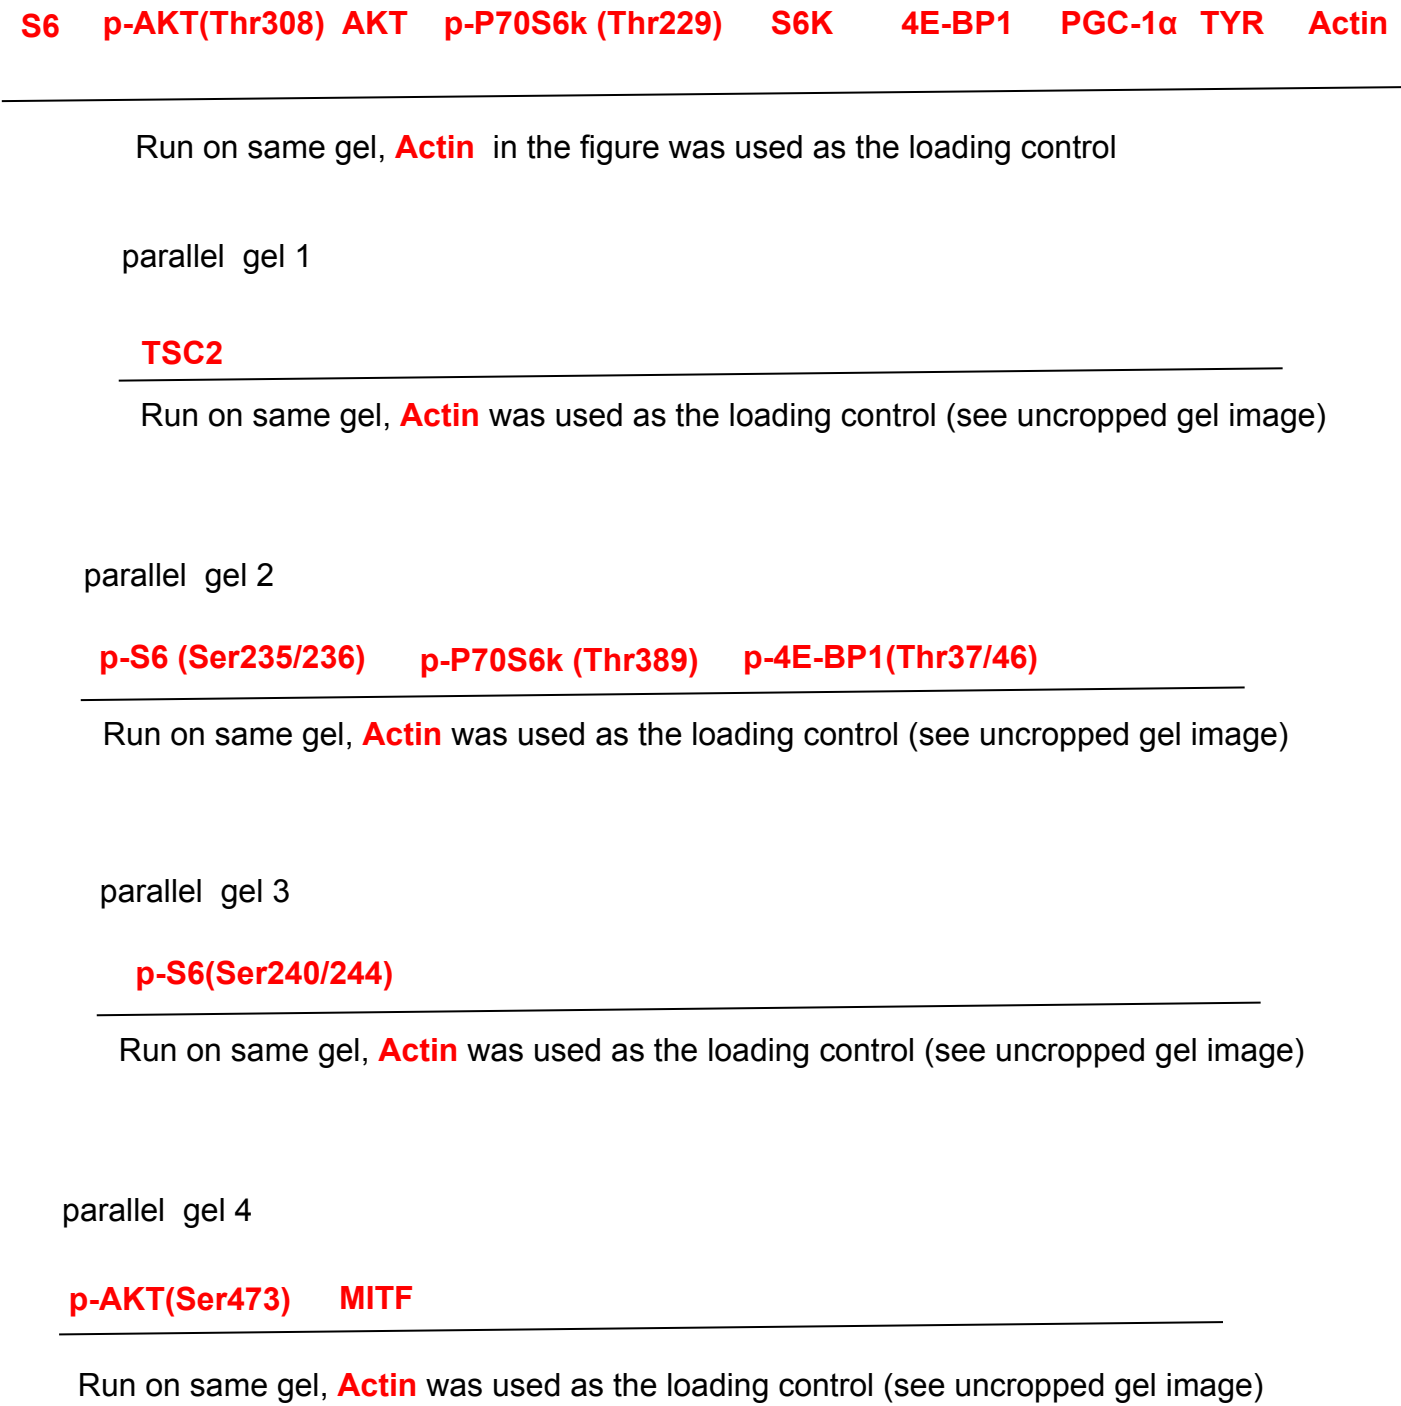

Figure S2

# E Full unedited gel for Figure S2E

Blots were cut for different antibody staining and exposed on the same film

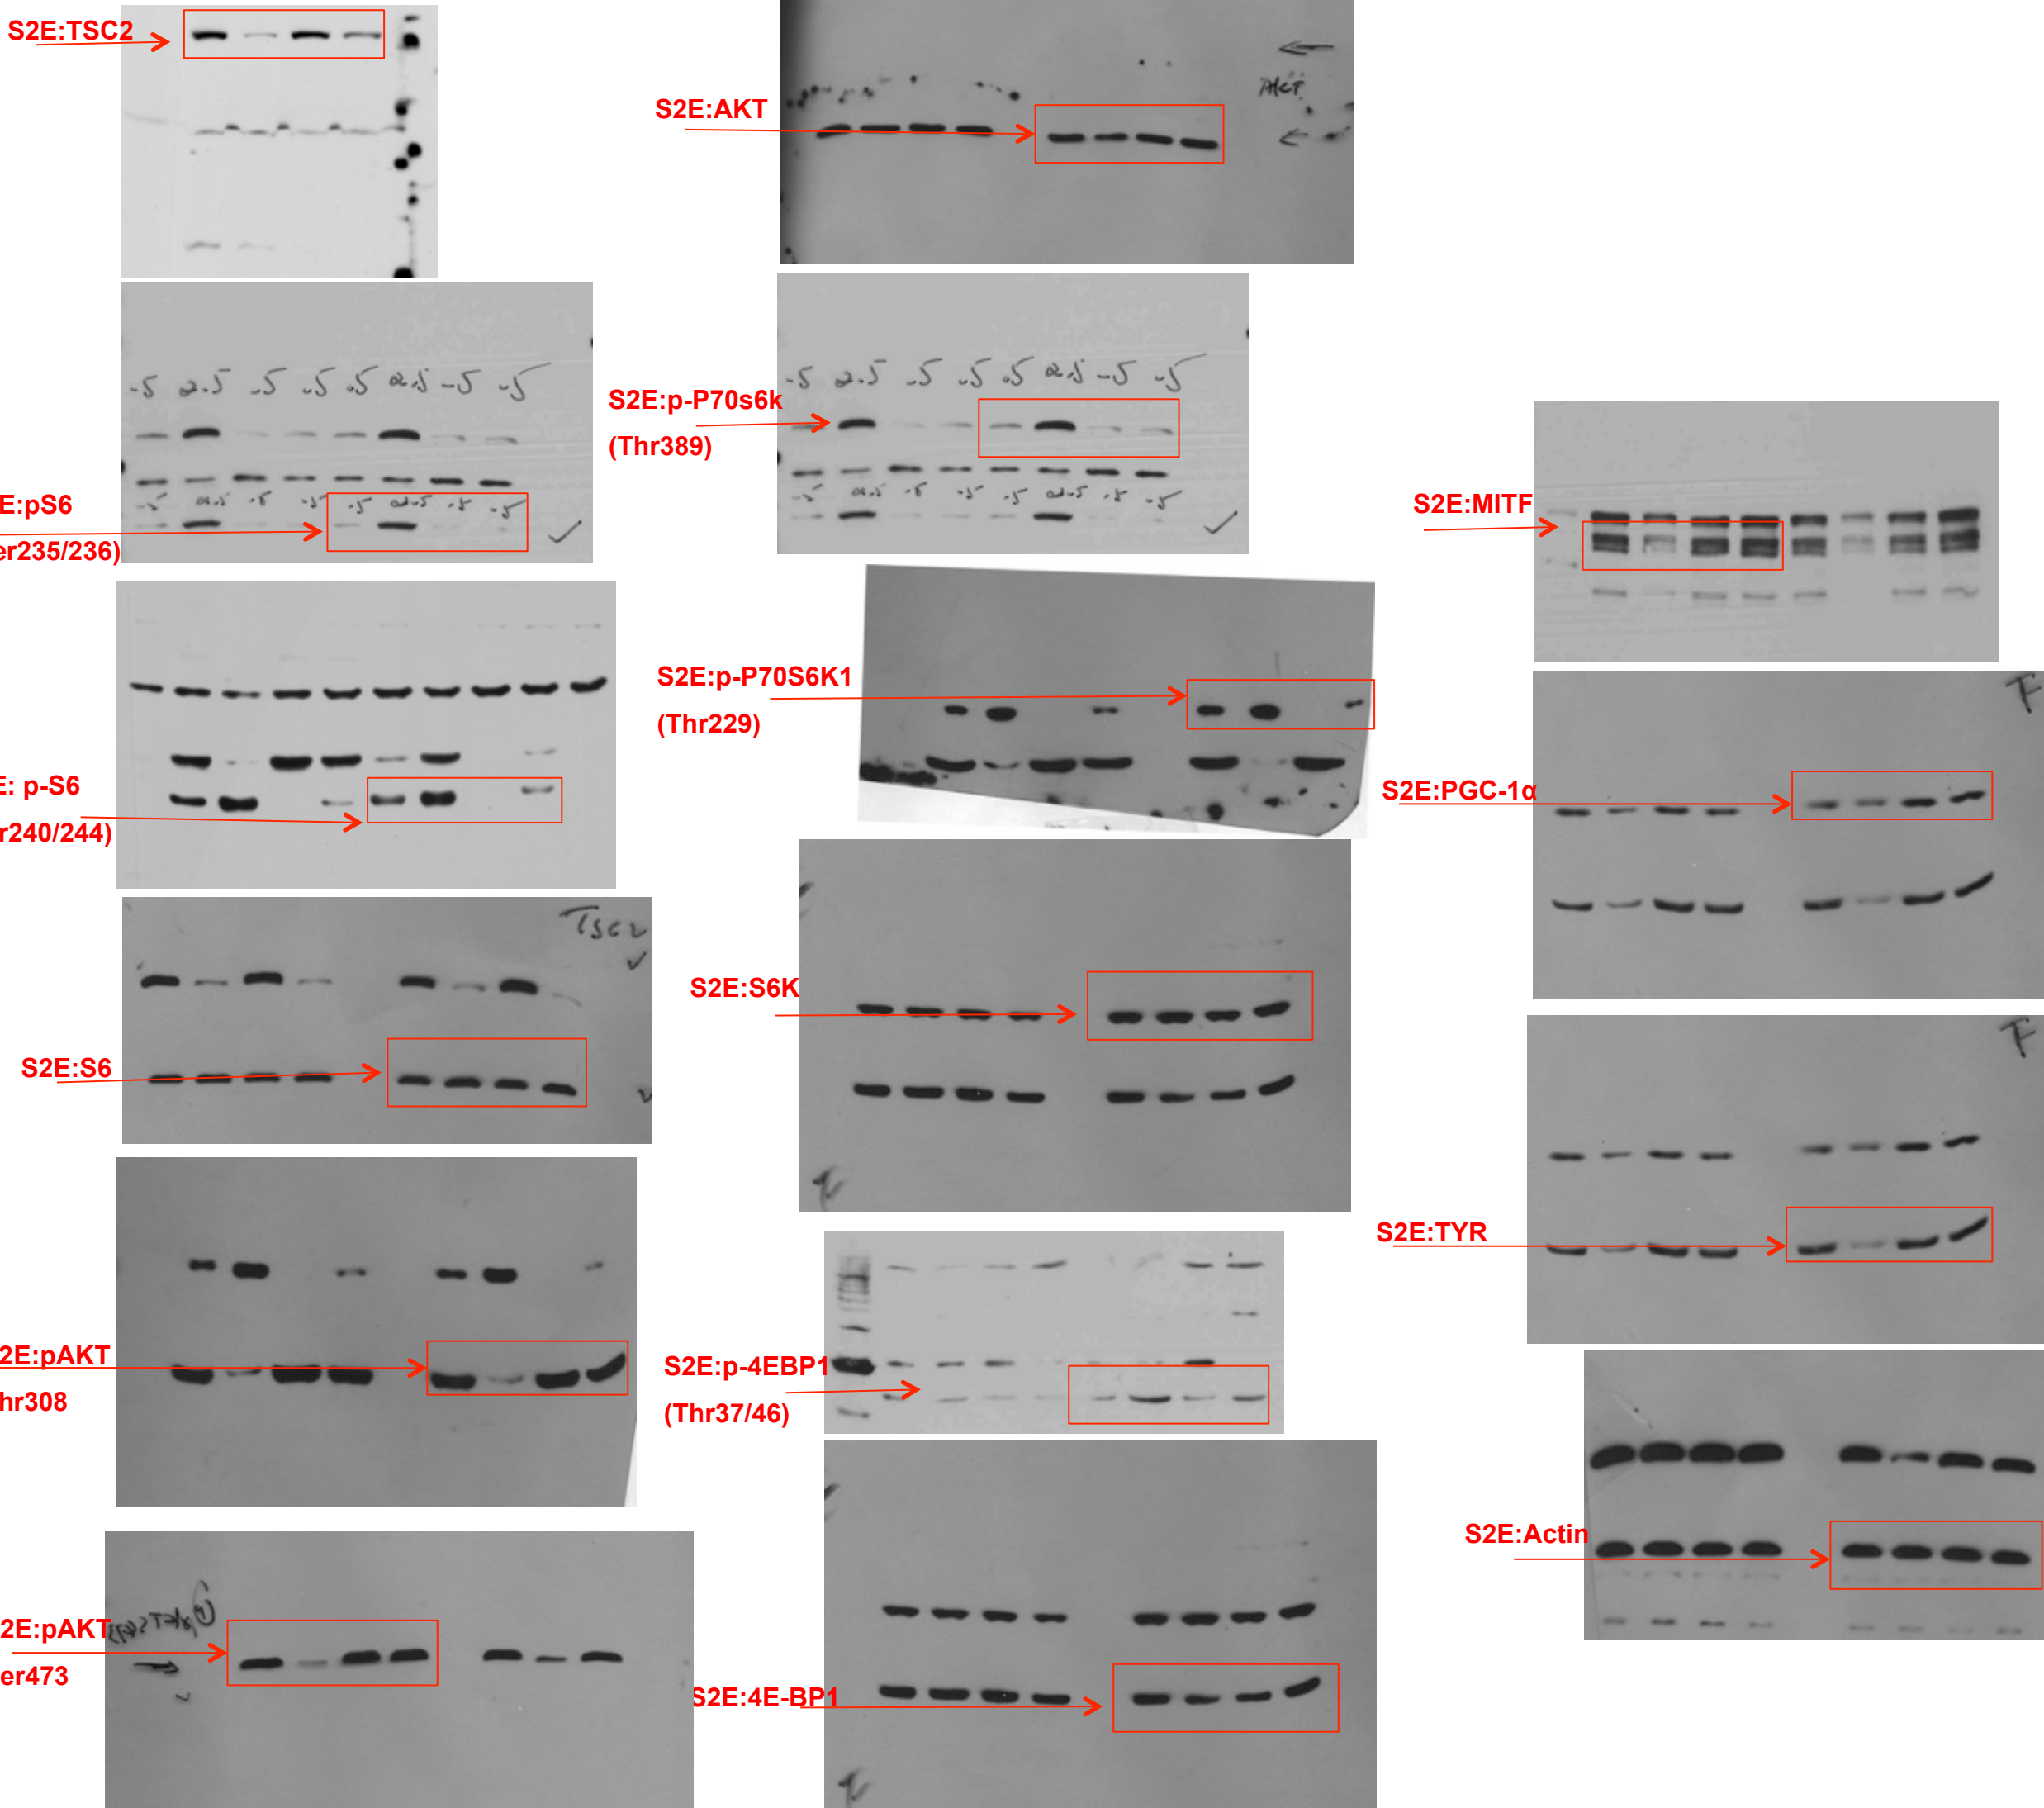

Figure S2

# Loading controls for parallel gels in figure S2E

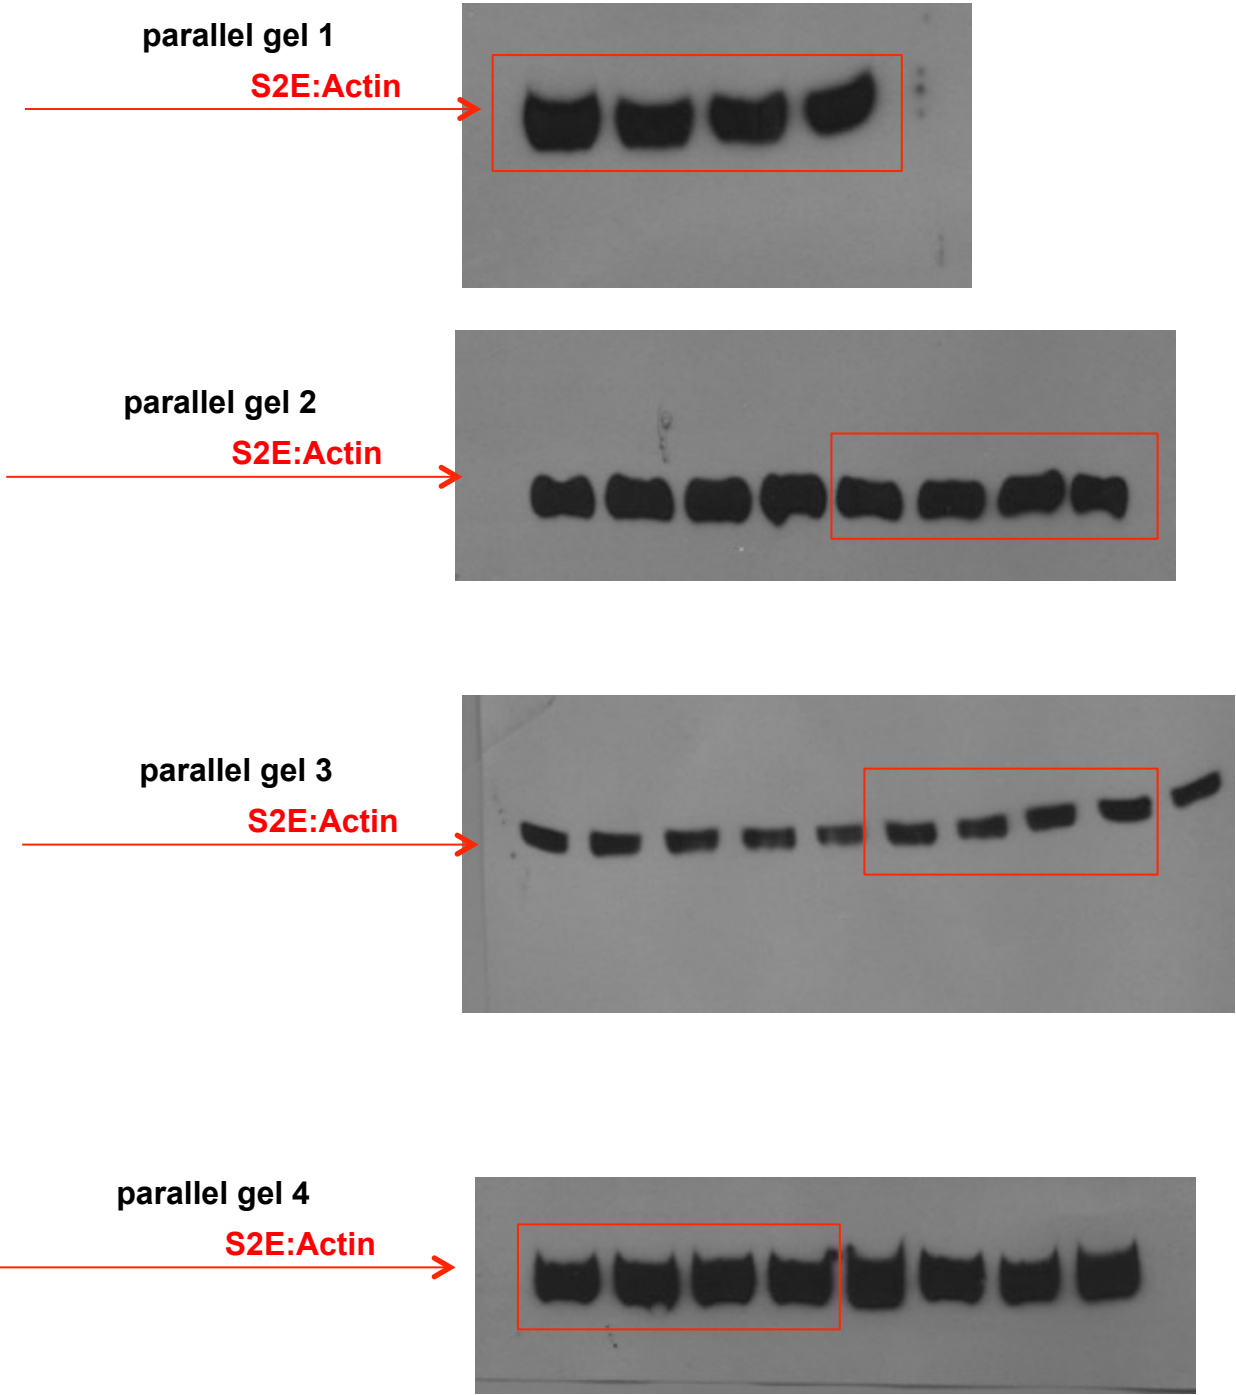

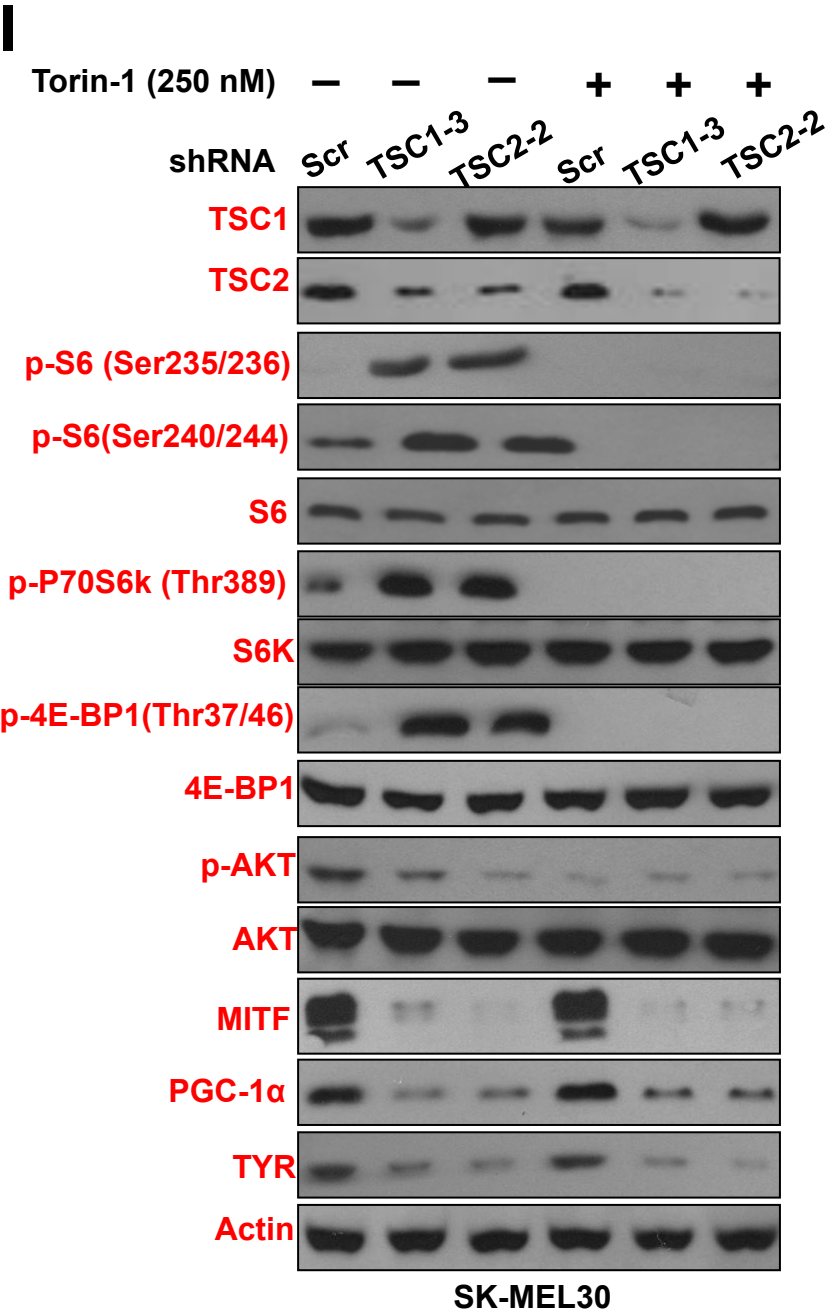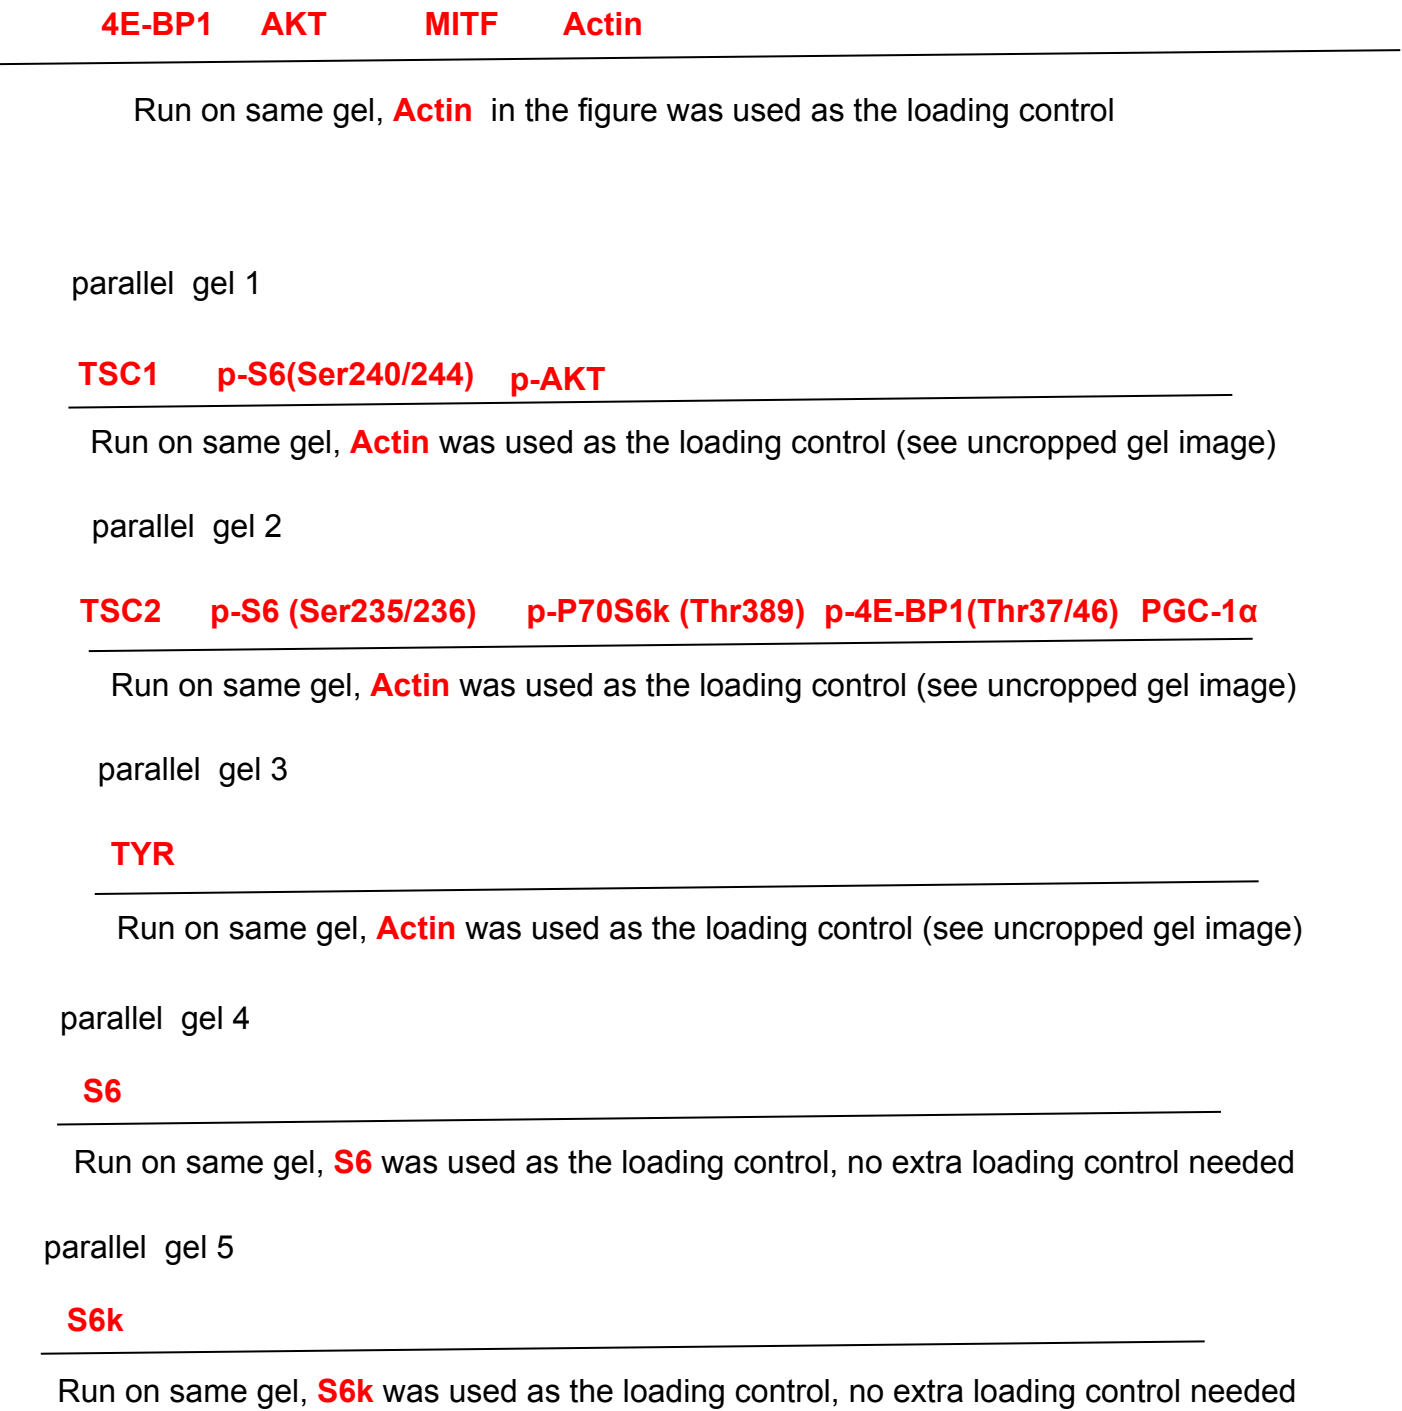

**Figure S2**

# Full unedited gel for Figure S2

Blots were cut for different antibody staining and exposed on the same film

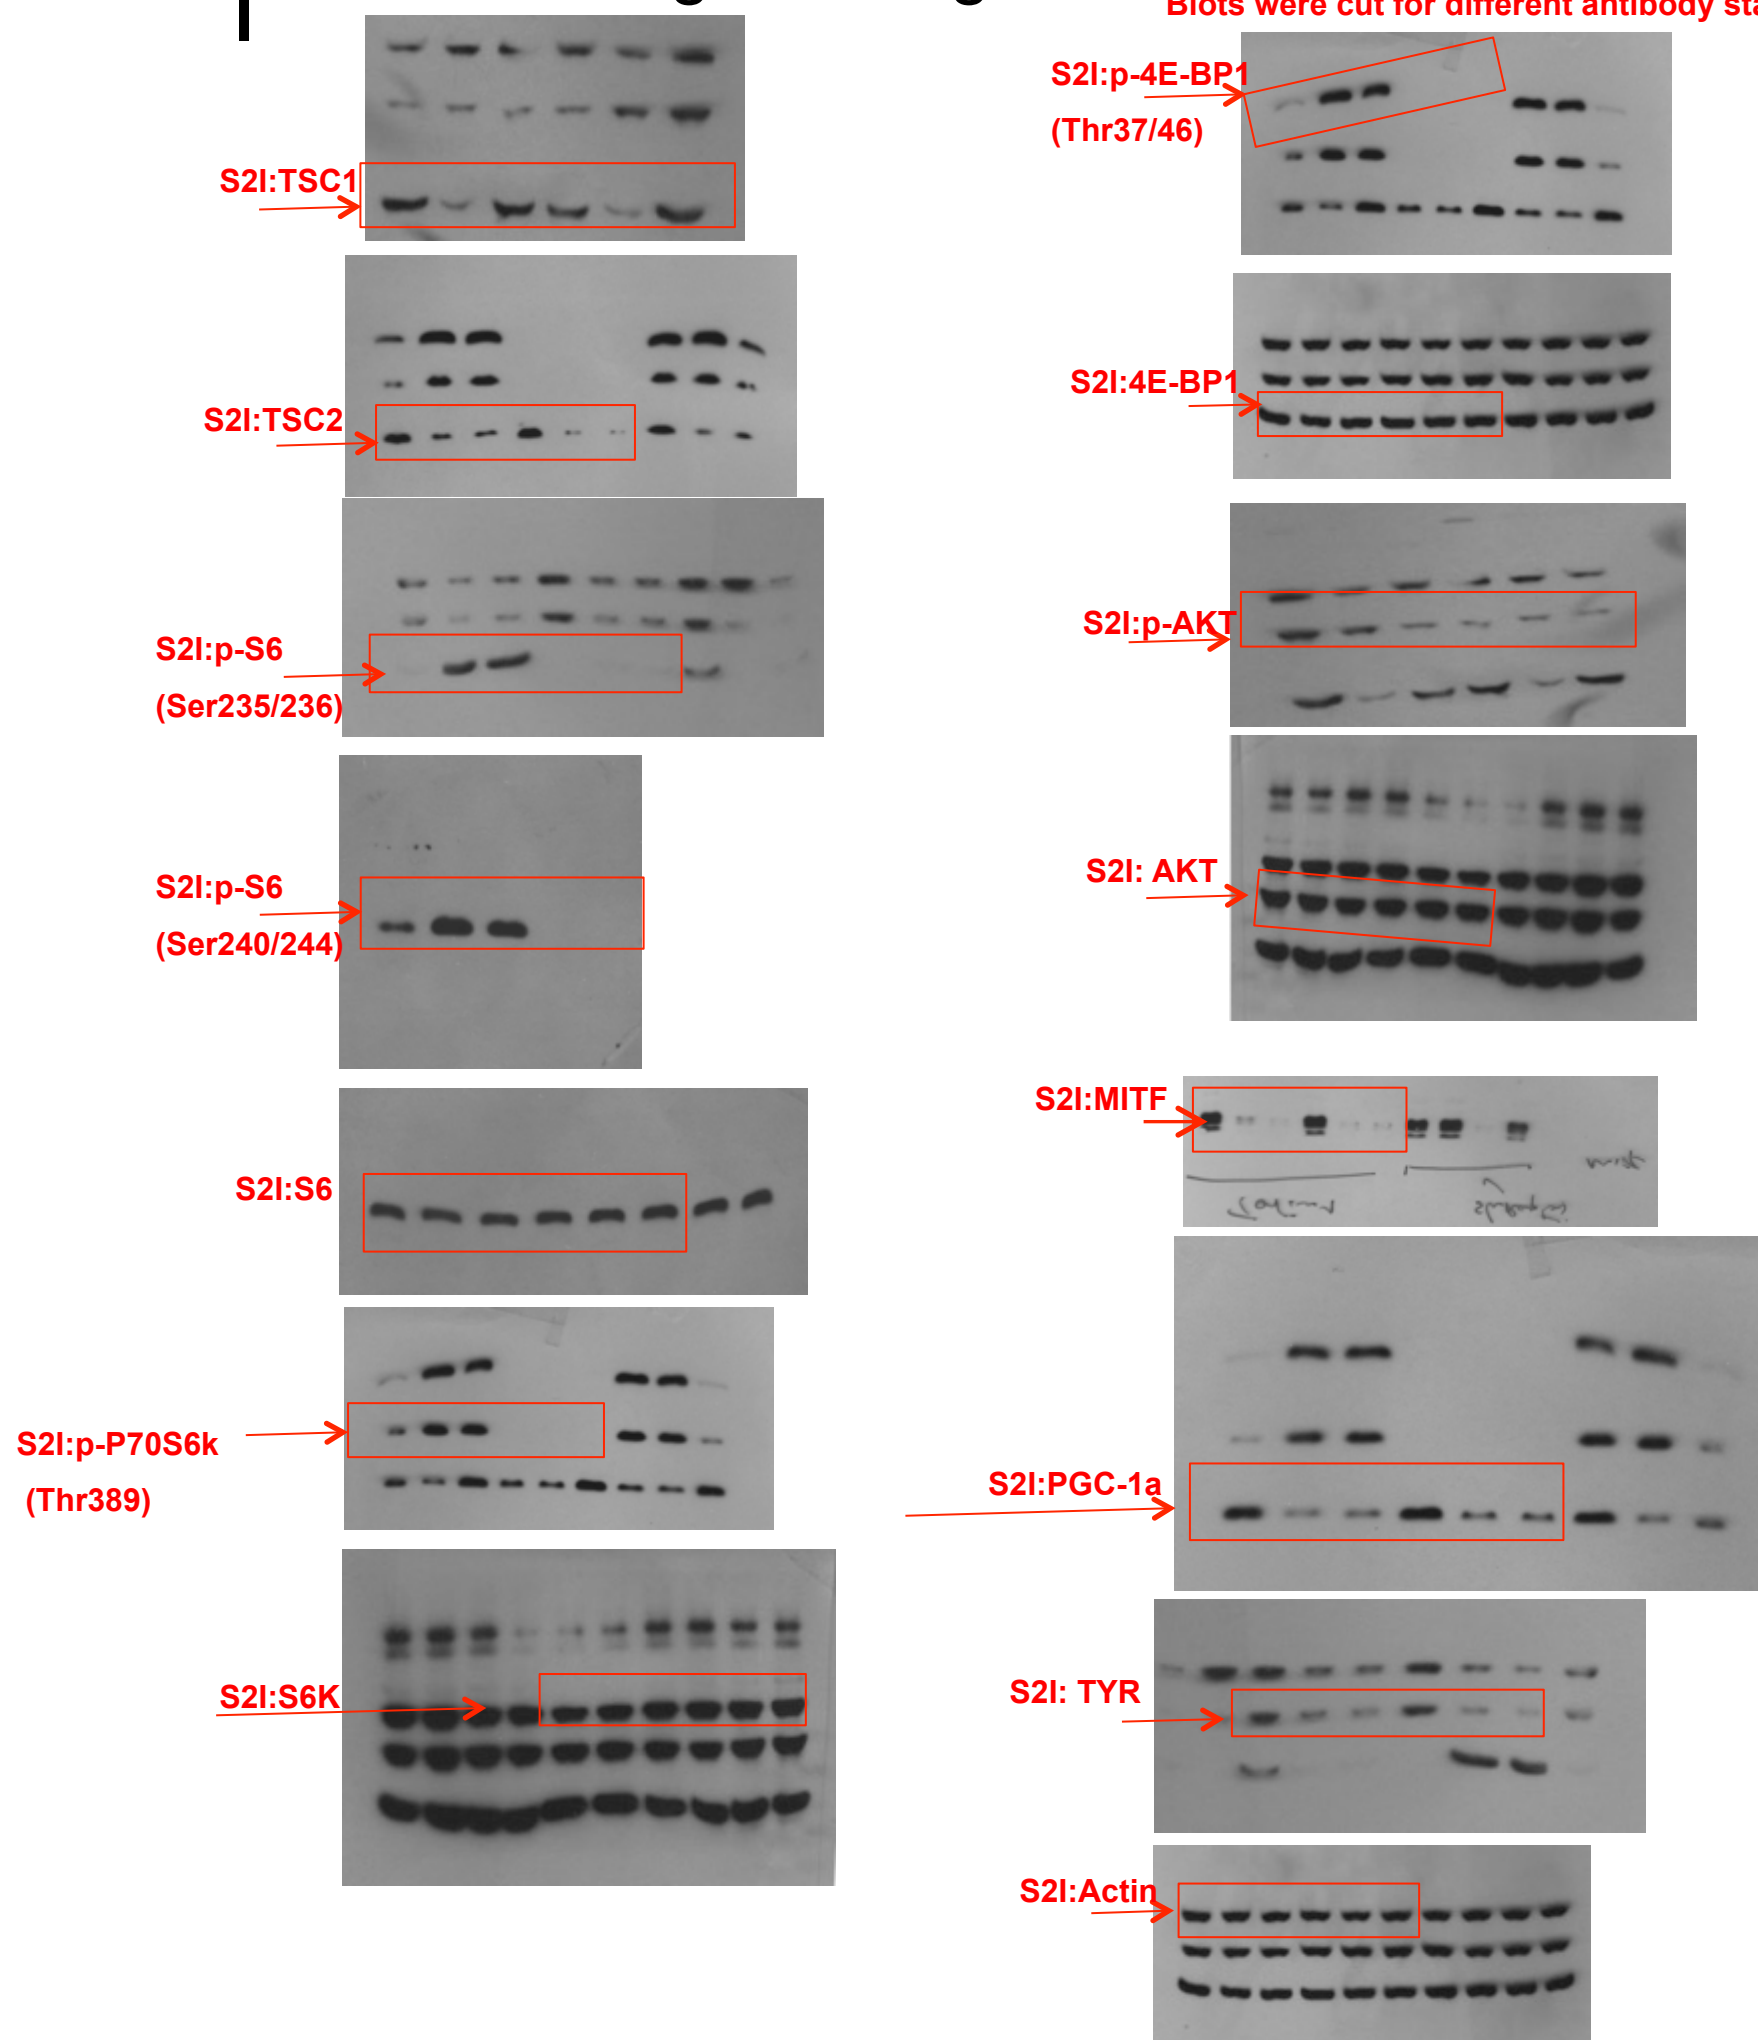

Figure S2

# Loading controls for parallel gels in figure S2I

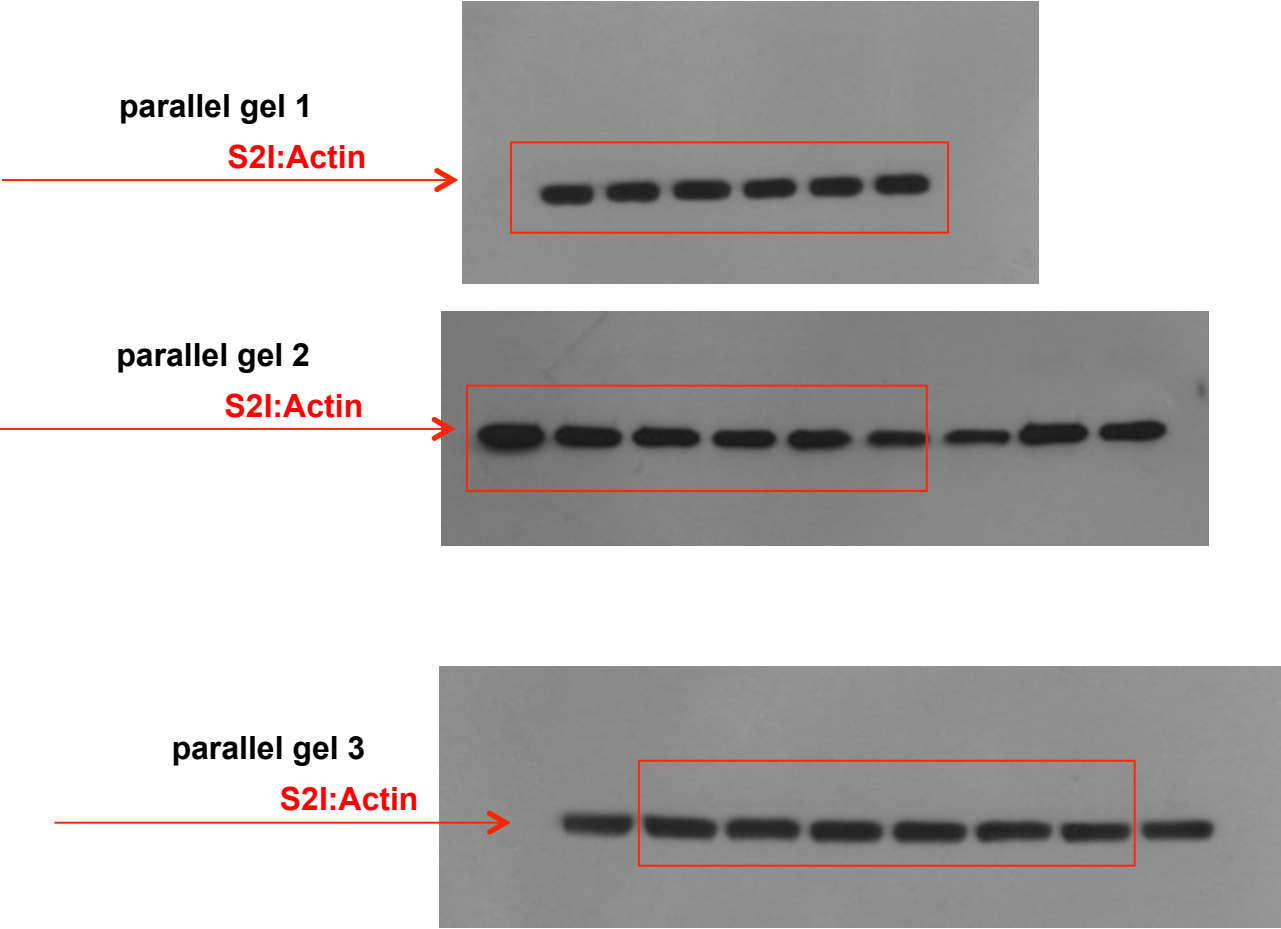

parallel gel 4

S2I:

No extra loading control needed

parallel gel 5

S2I:

No extra loading control needed

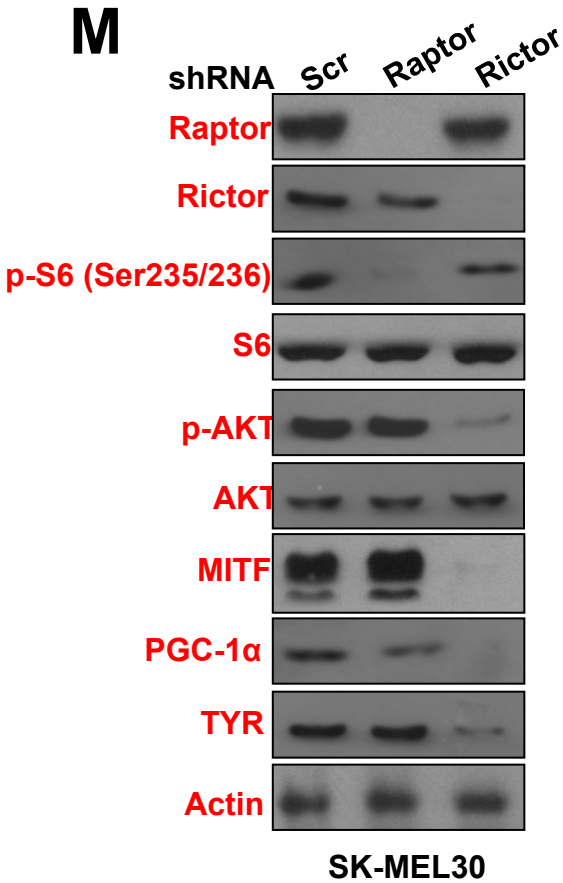

parallel gel 1

Raptor

Run on same gel, **Actin** was used as the loading control (see uncropped gel image)

parallel gel 2

p-S6 (Ser235/236) p-AKT

Run on same gel, **Actin** was used as the loading control (see uncropped gel image)

parallel gel 3

S6 MITF

Run on same gel, **S6** in the figure was used as a loading control, no extra loading control needed

parallel gel 4

AKT PGC-1α TYR

Run on same gel, **AKT** in the figure was used as a loading control, no extra loading control needed

parallel gel 5

Actin

Run on same gel, **Actin** in the figure was used as the loading control, no extra loading control needed



# Full unedited gel for Figure S2M

Blots were cut for different antibody staining and exposed on the same film

M

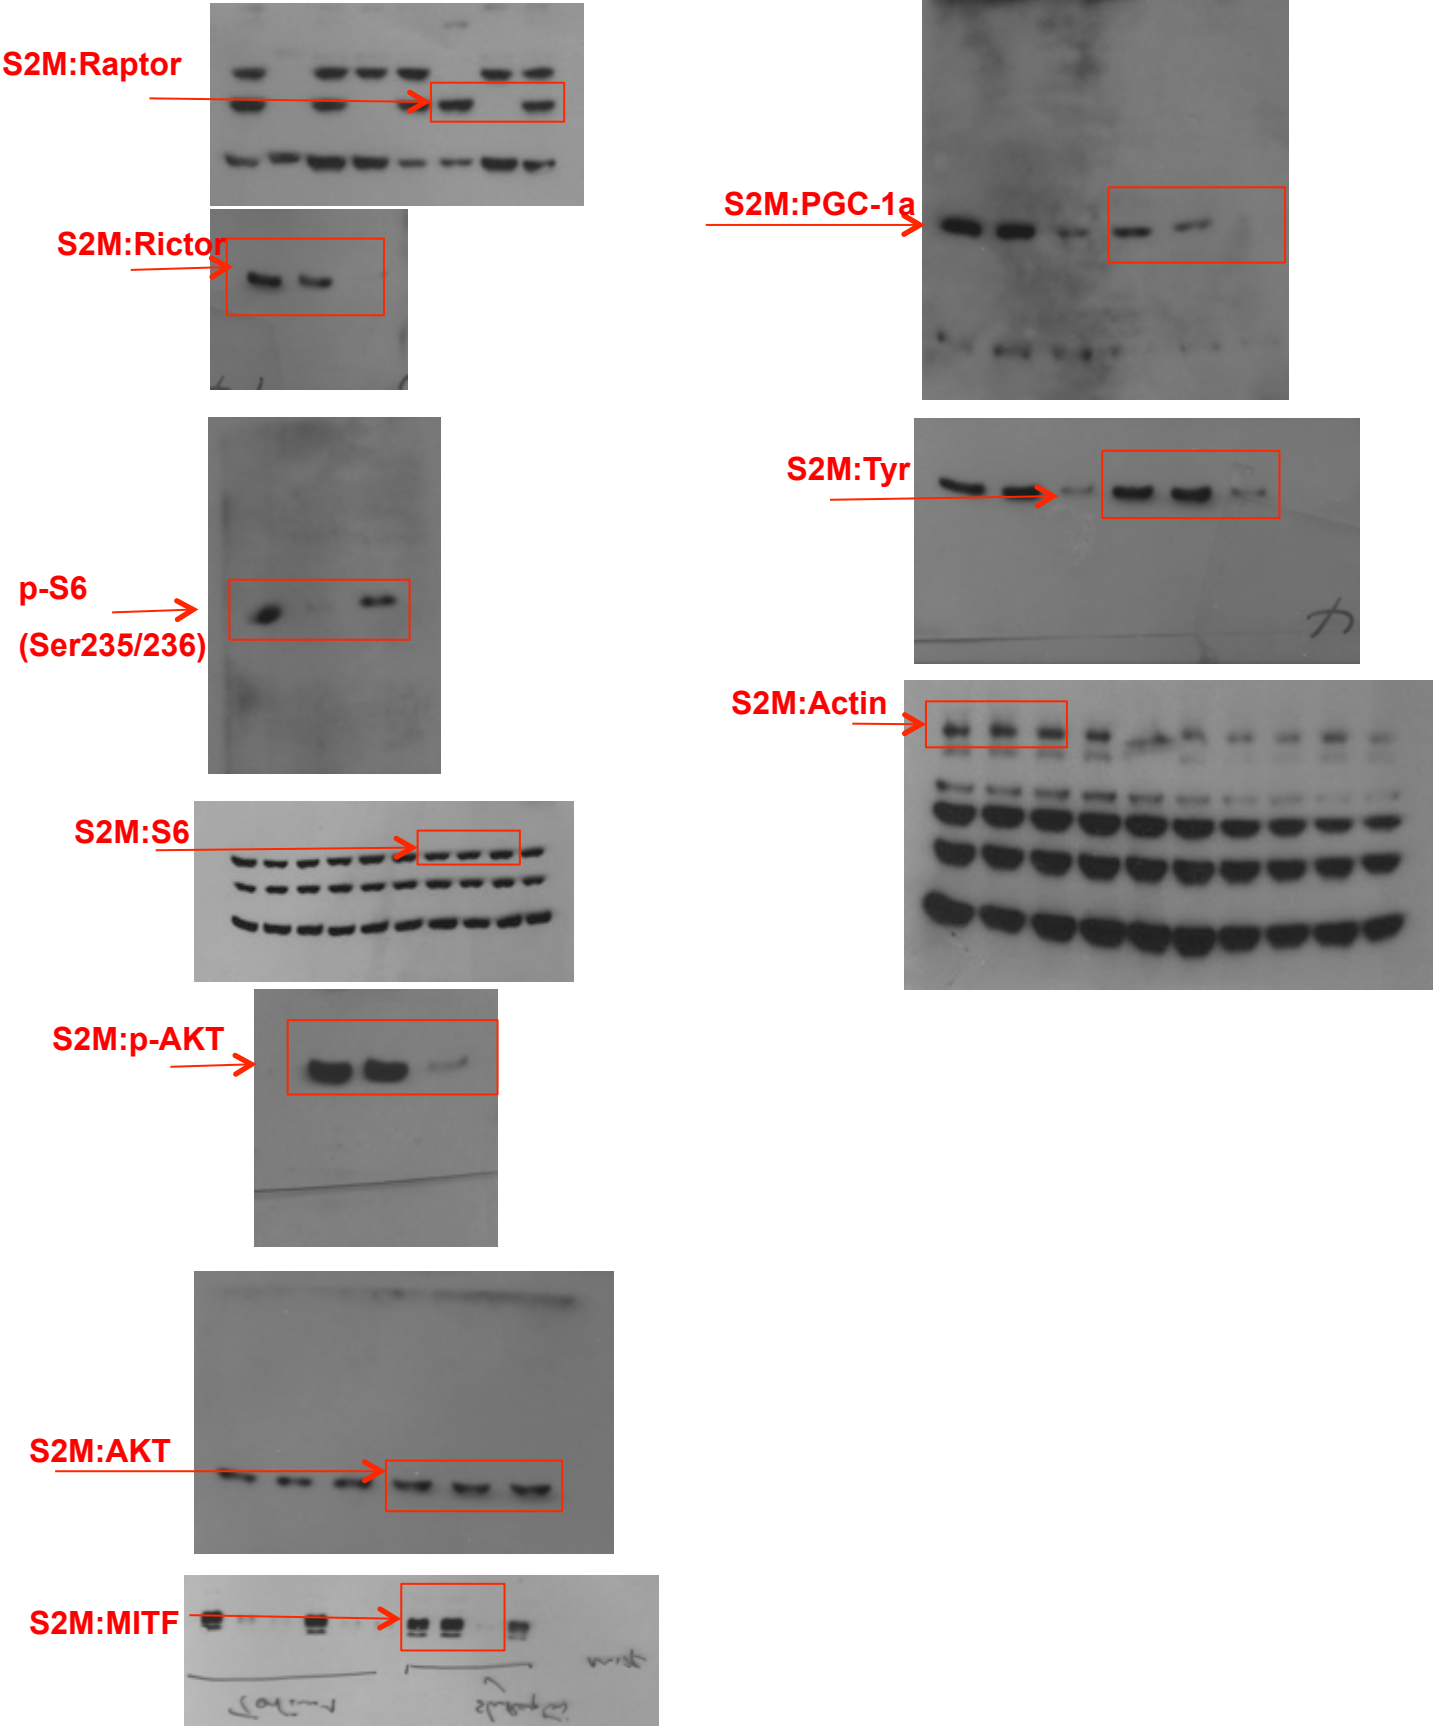

Figure S2

# Loading controls for parallel gels in figure S2M

parallel gel 1

S2M:Actin

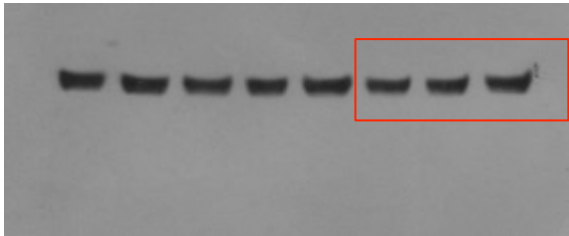

parallel gel 2

S2M:Actin

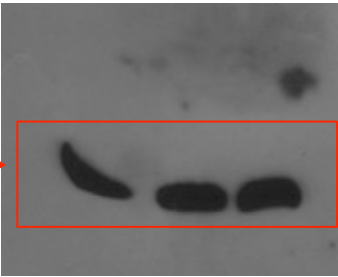

parallel gel 3

S2M:

No extra loading control needed

parallel gel 4

S2MI:

No extra loading control needed

parallel gel 5

S2M:

No extra loading control needed

A

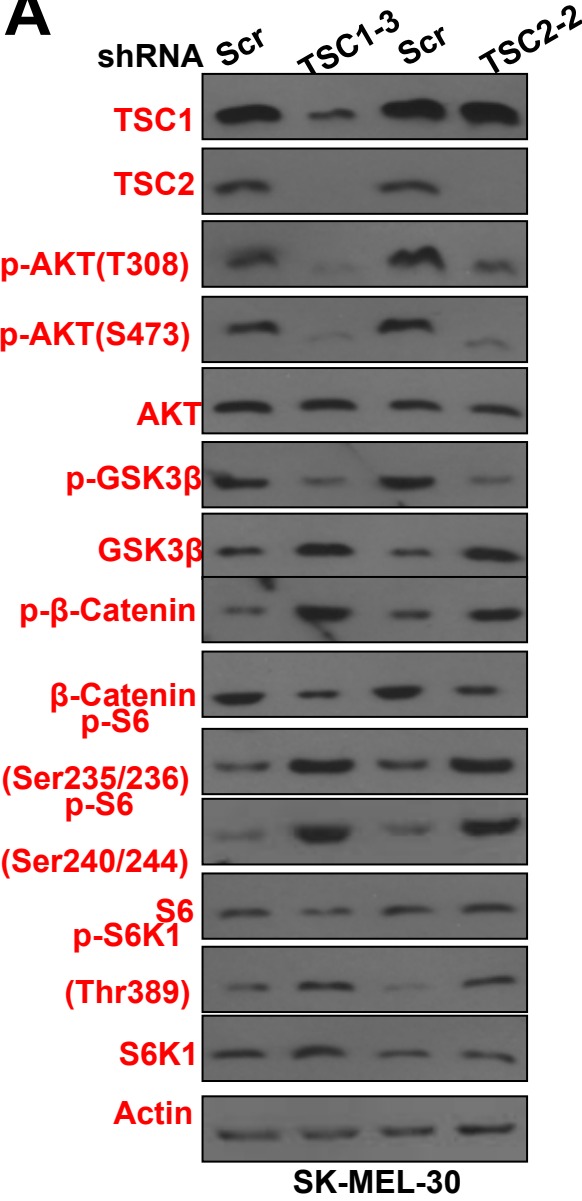

parallel gel 1

TSC1    TSC2    p-AKT(T308)    p-AKT(S473)    AKT

Run on same gel, **AKT** in the figure was used as a loading control, no extra loading control needed

parallel gel 2

p-GSK3β    GSK3β    p-β-Catenin    β-Catenin    p-S6 (Ser235/236)    p-S6 (Ser240/244)    S6

Run on same gel, **S6** in the figure was used as a loading control, no extra loading control needed

parallel gel 3

p-S6K1 (Thr389)    S6K1    Actin

Run on same gel, **Actin** in the figure was used as the loading control, no extra loading control needed

Figure S3

**A**

Full unedited gel for Figure S3A

Blots were cut for different antibody staining and exposed on the same film

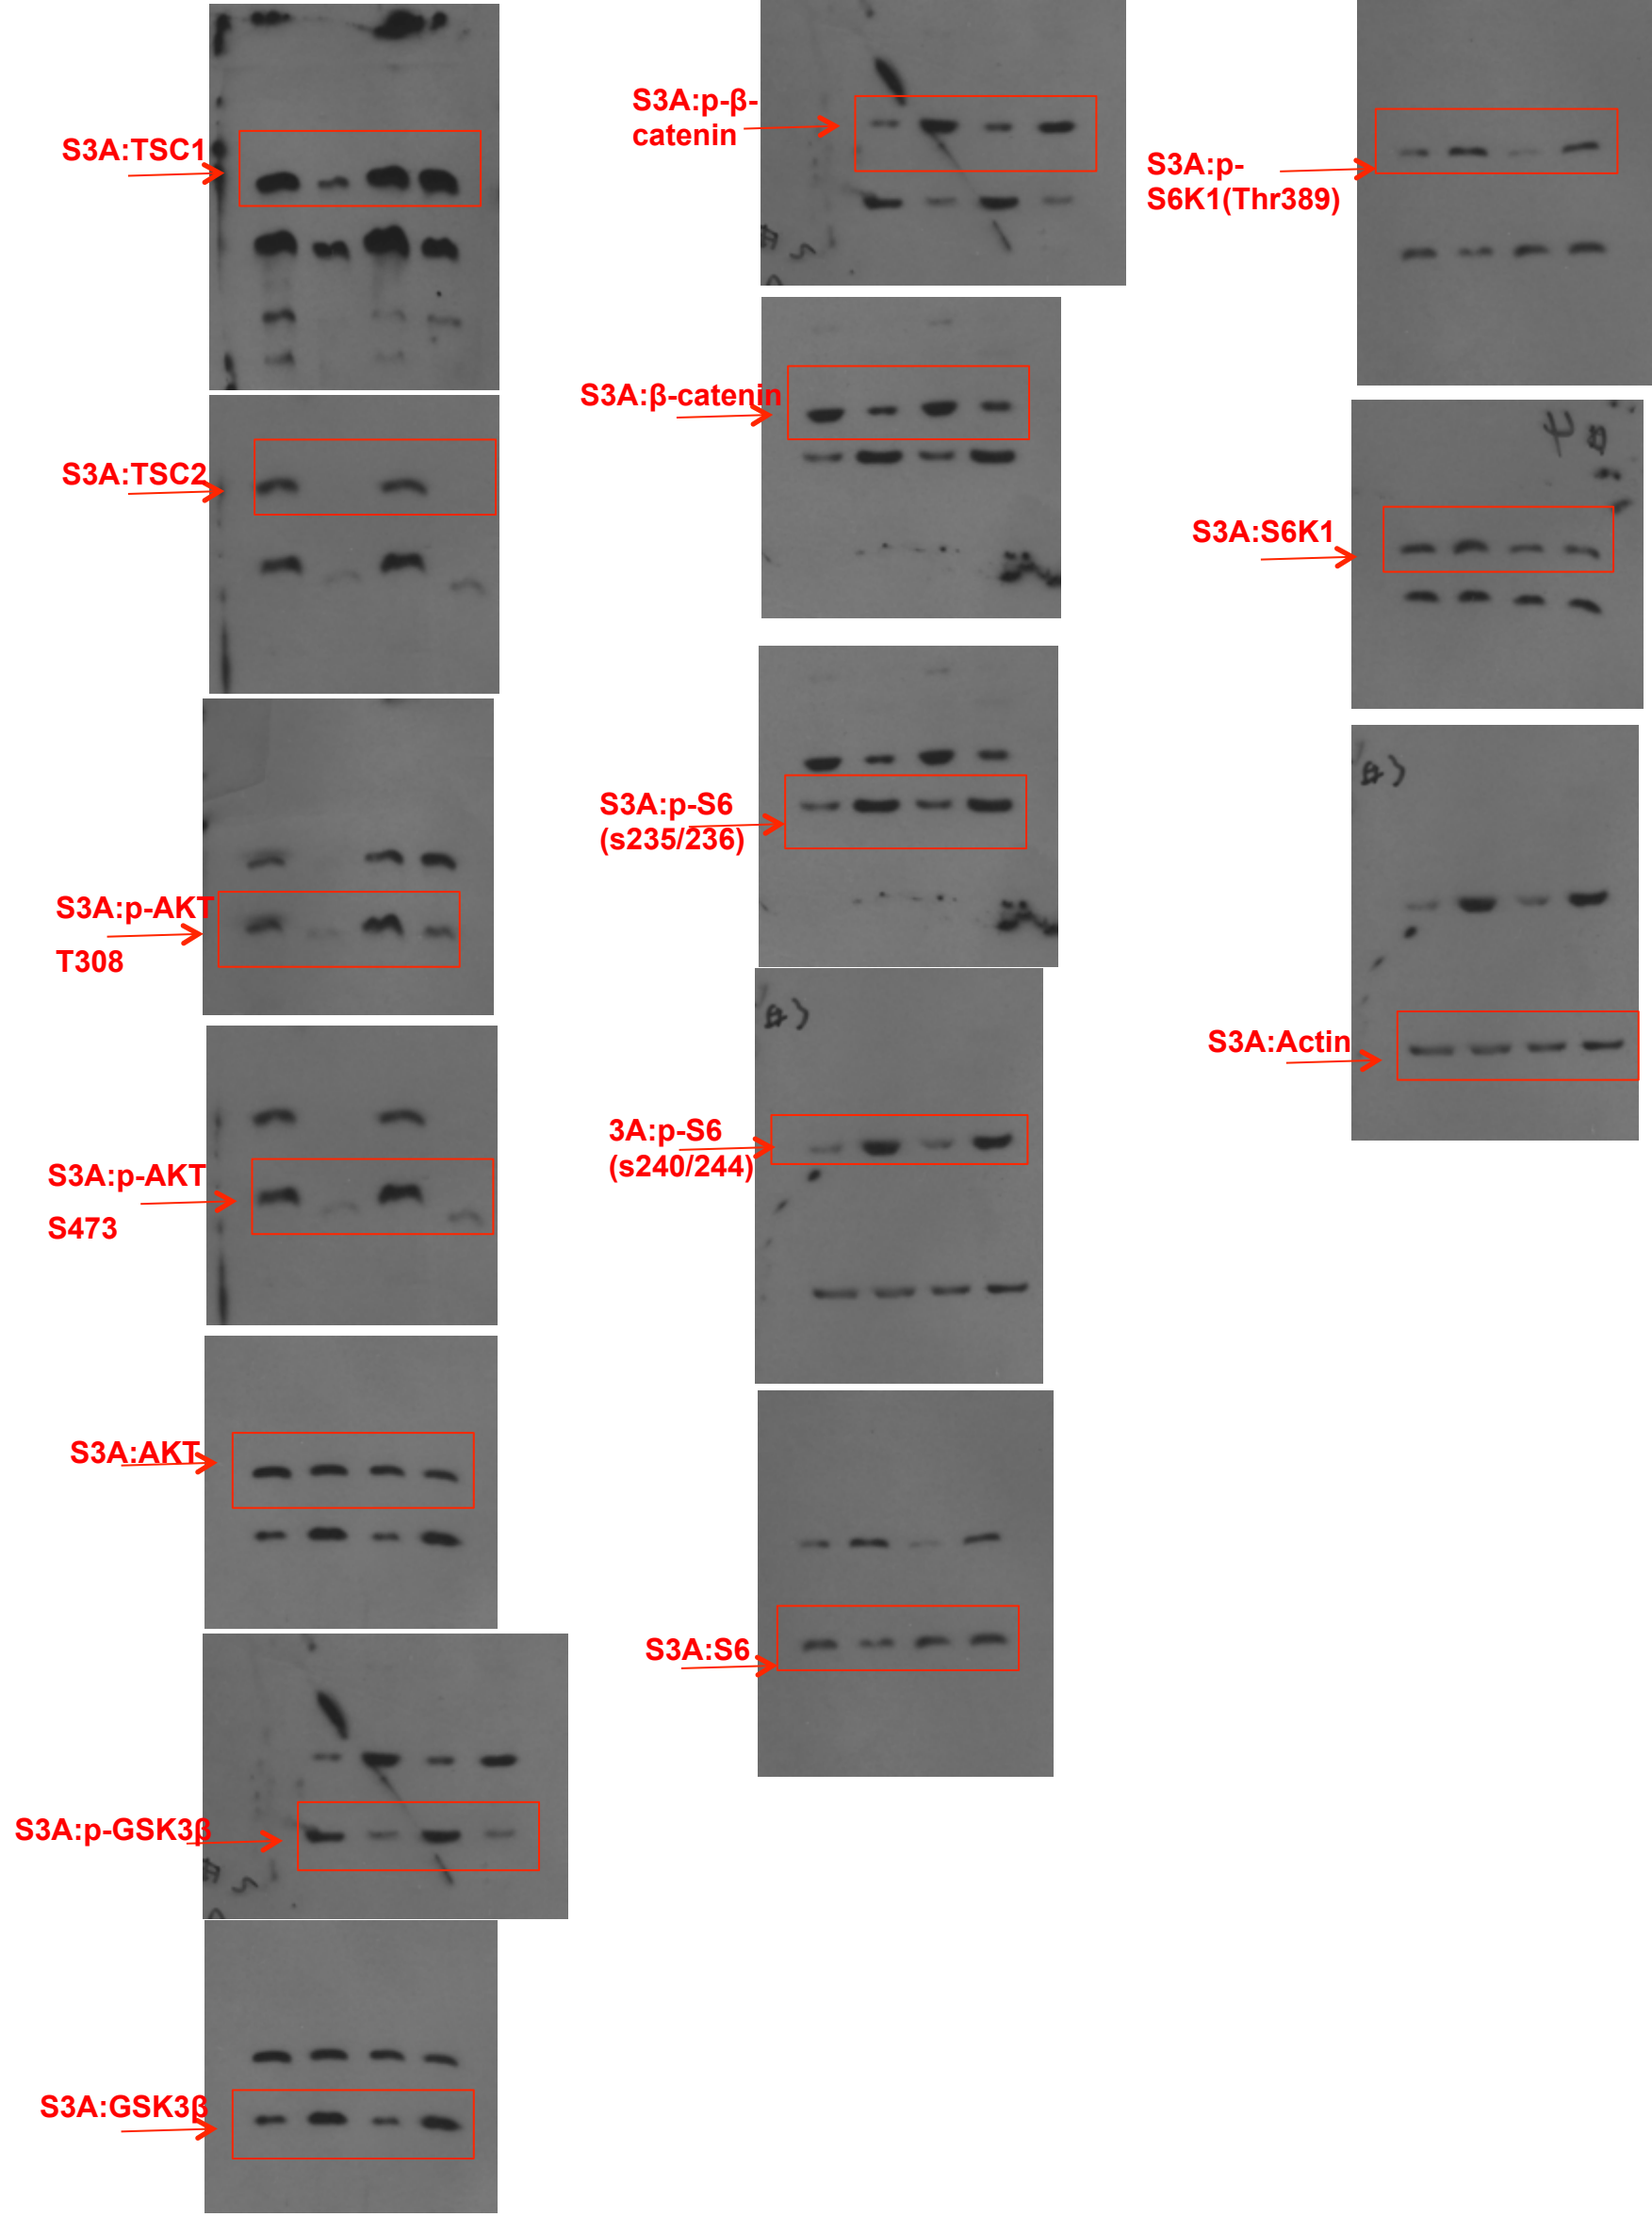

Figure S3

# Loading controls for parallel gels in figure S3A

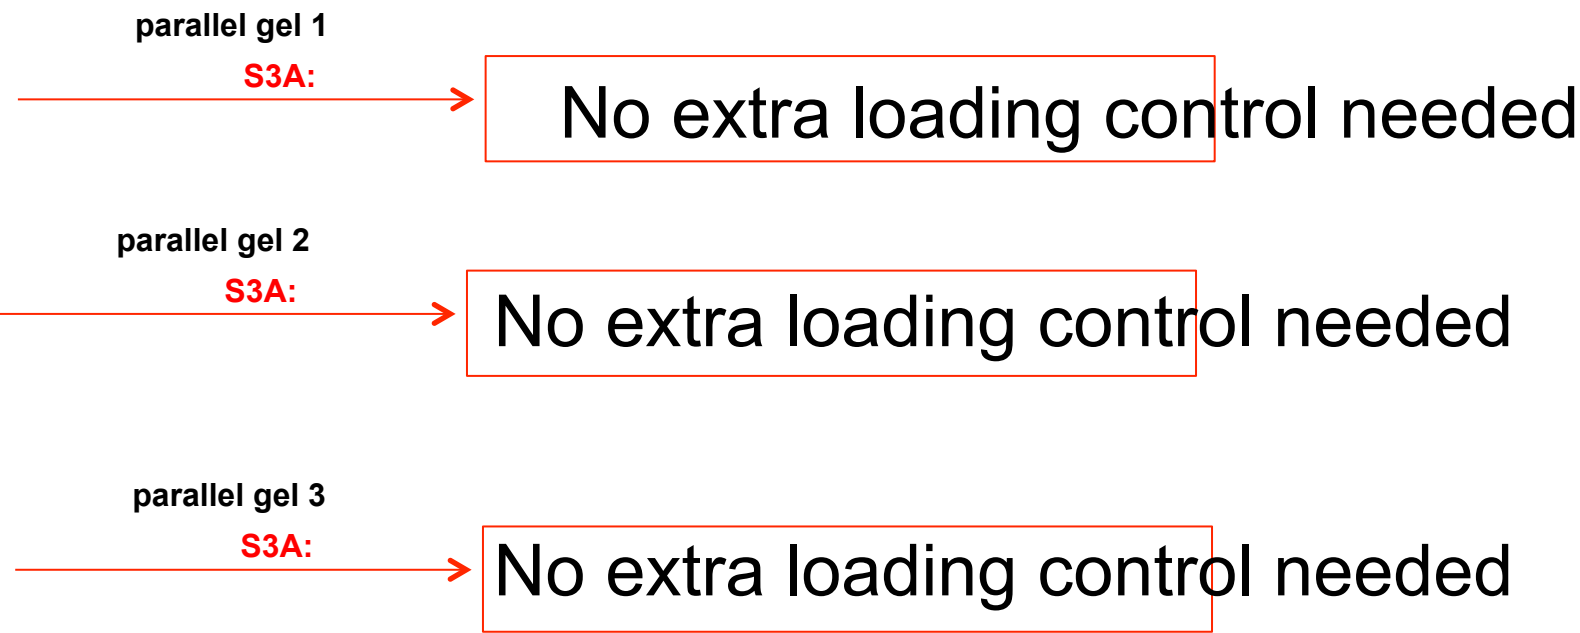

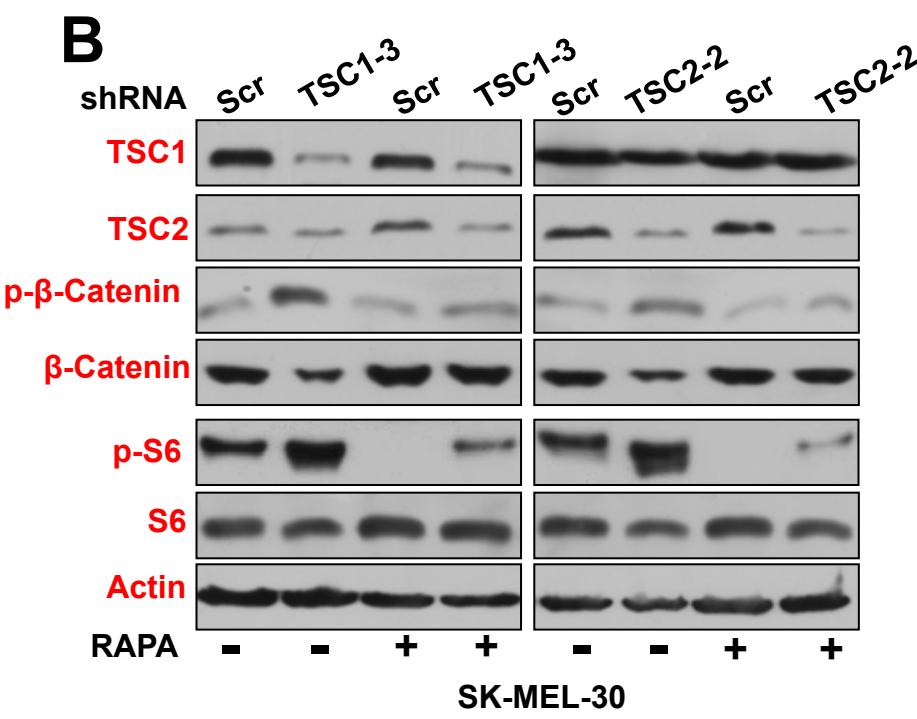

**TSC2   p-β-Catenin   β-Catenin   Actin**

Run on same gel, **Actin** in the figure was used as a loading control

parallel gel 1

**TSC1 (left)**

Run on same gel, **Actin** was used as a loading control, (see uncropped gel image

parallel gel 2

**TSC1 (right)**

Run on same gel, **Actin** was used as a loading control, (see uncropped gel image

parallel gel 3

**p-S6   S6**

Run on same gel, **S6** in the figure was used as the loading control, no extra loading control needed

Figure S3

**B** Full unedited gel for Figure S3B

Blots were cut for different antibody staining and exposed on the same film

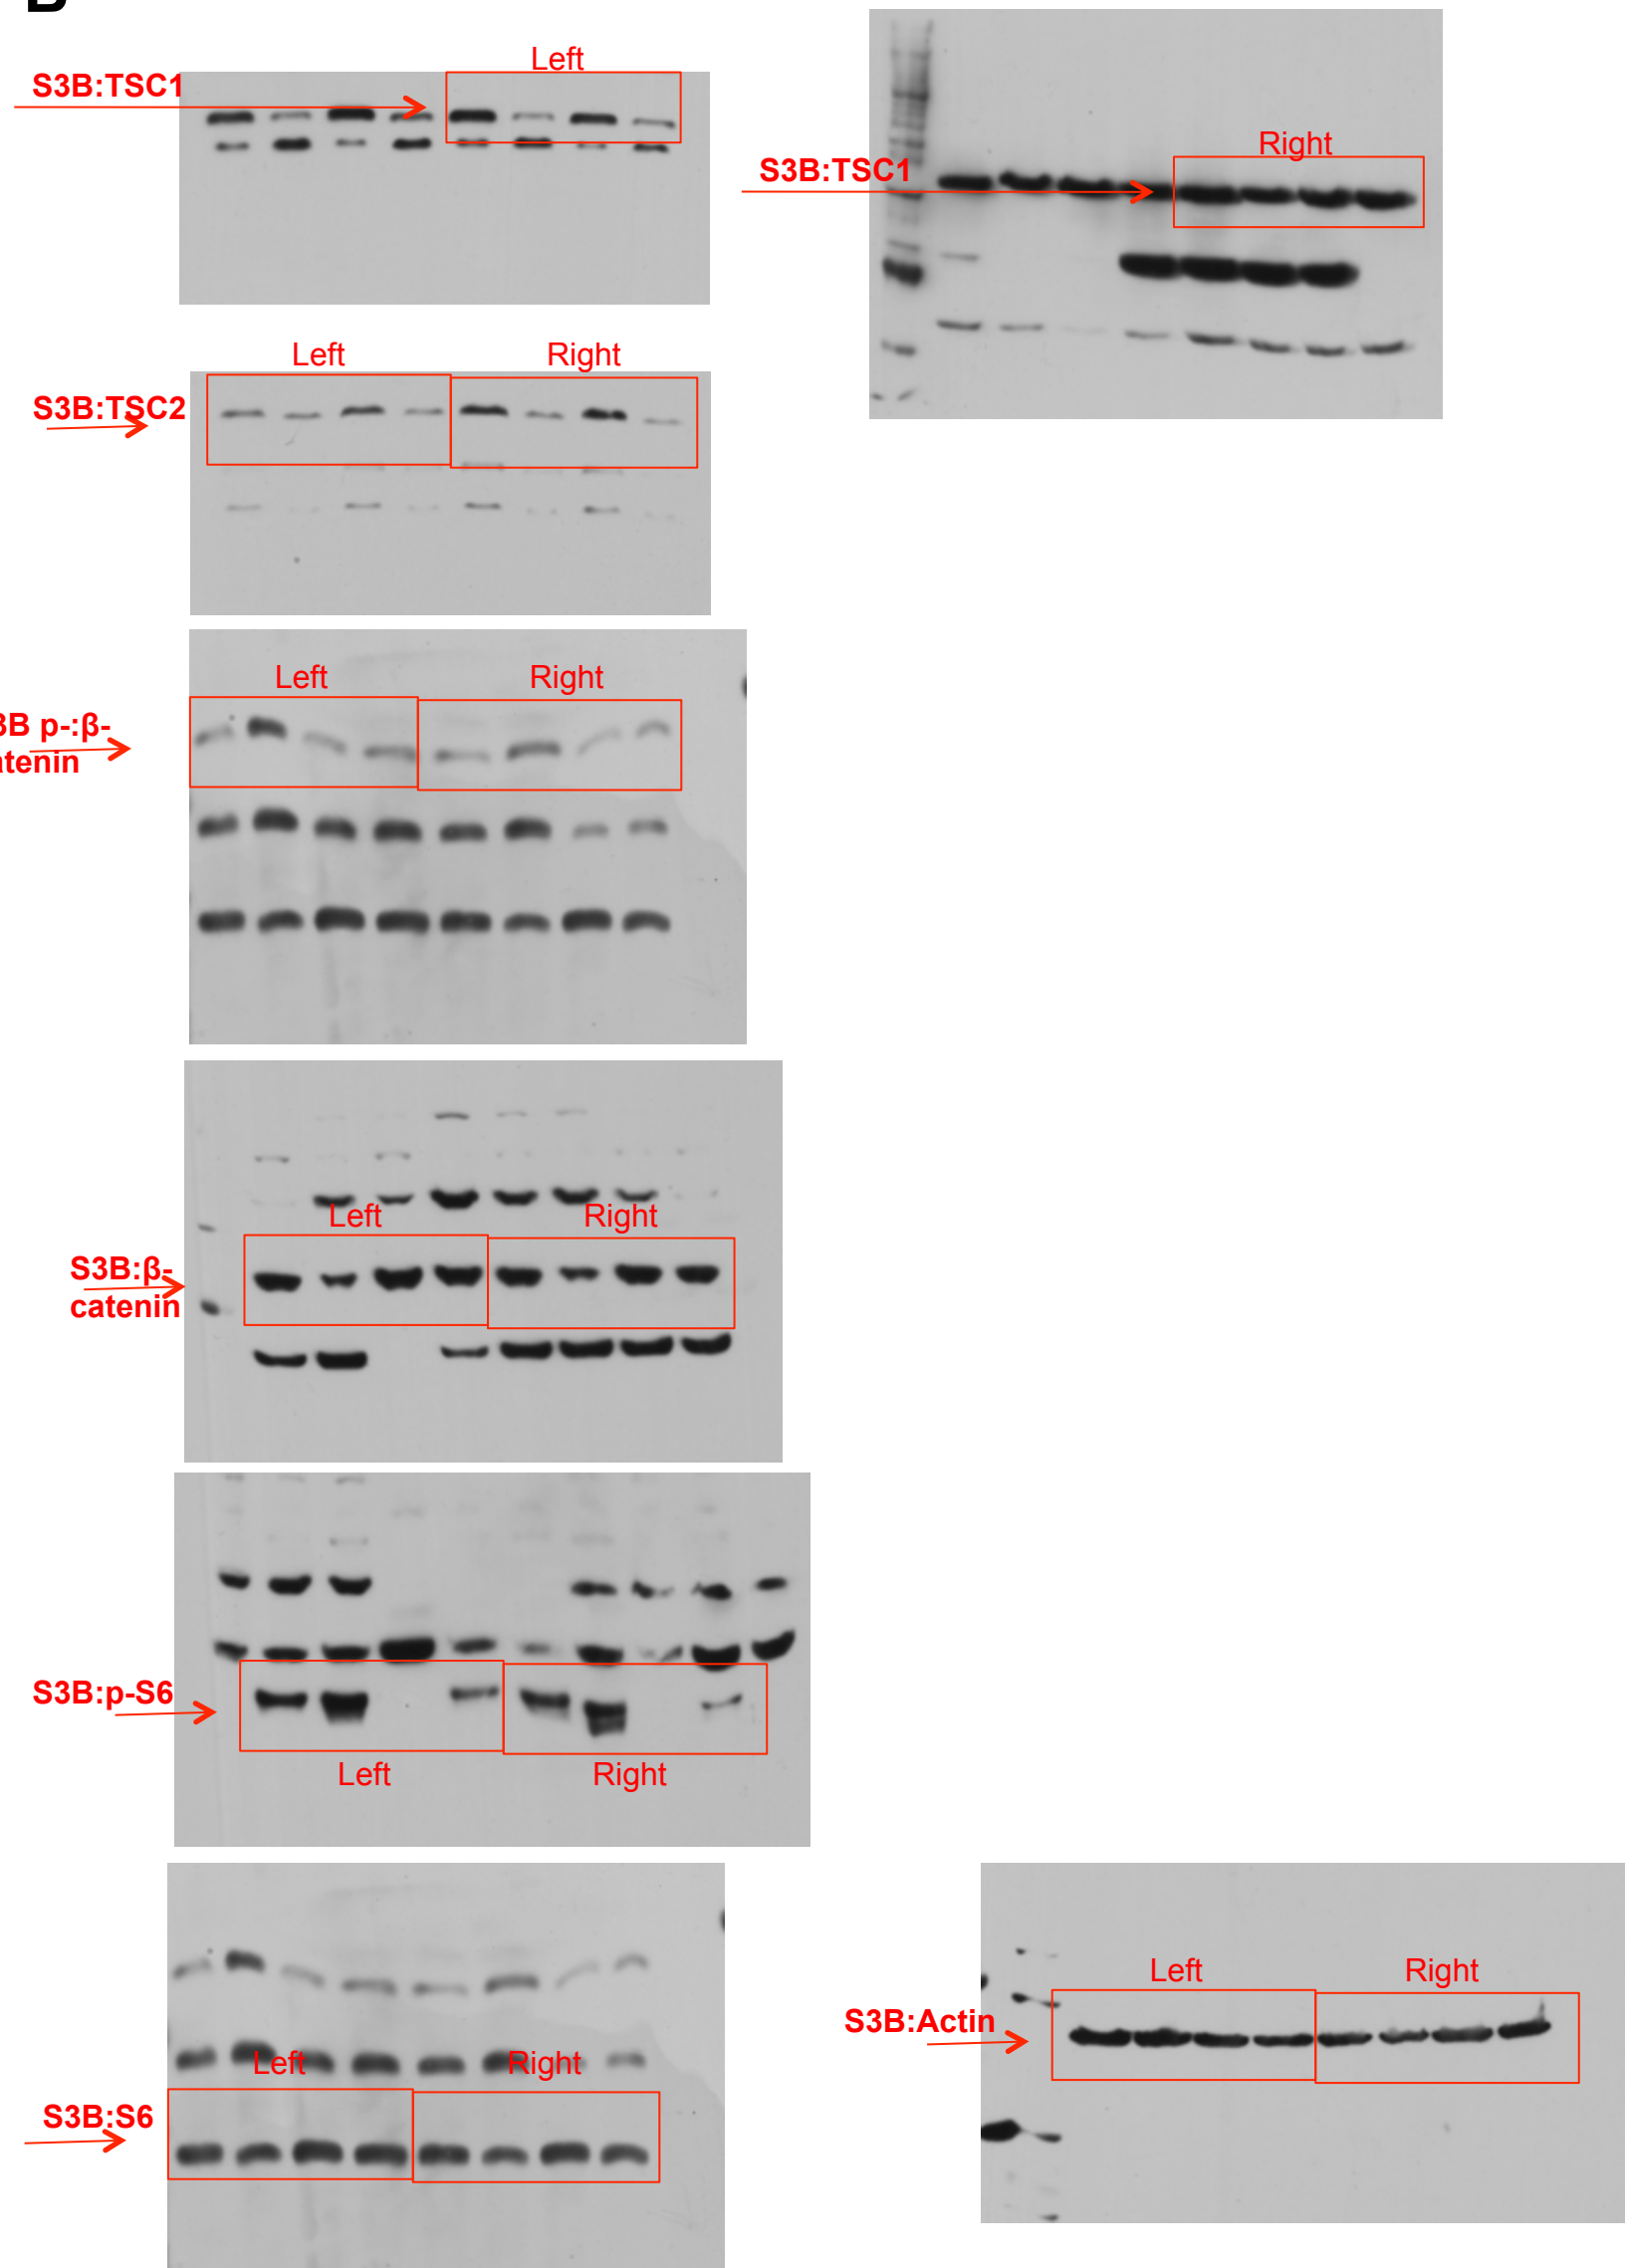

**Figure S3**

# Loading controls for parallel gels in figure S3B

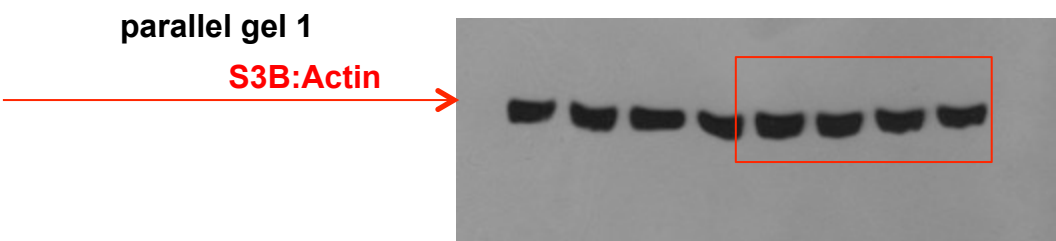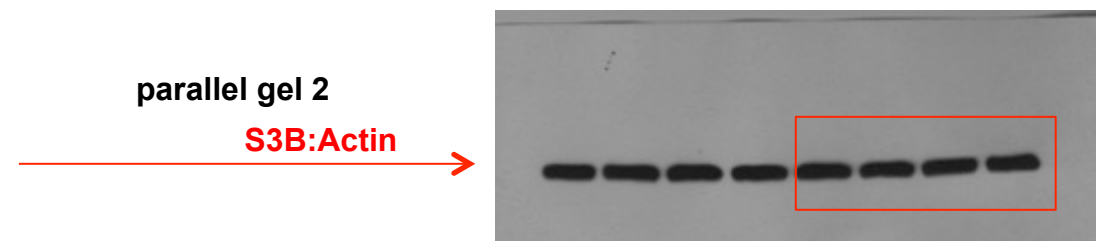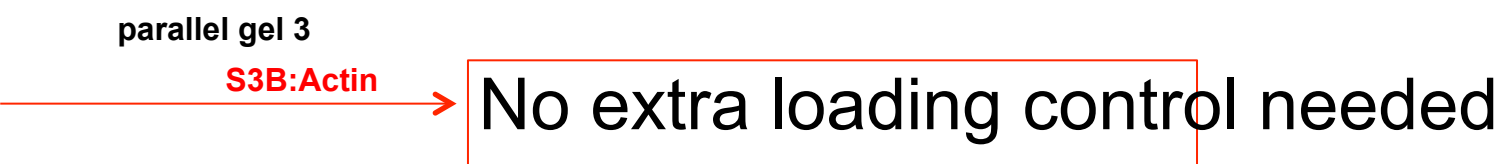



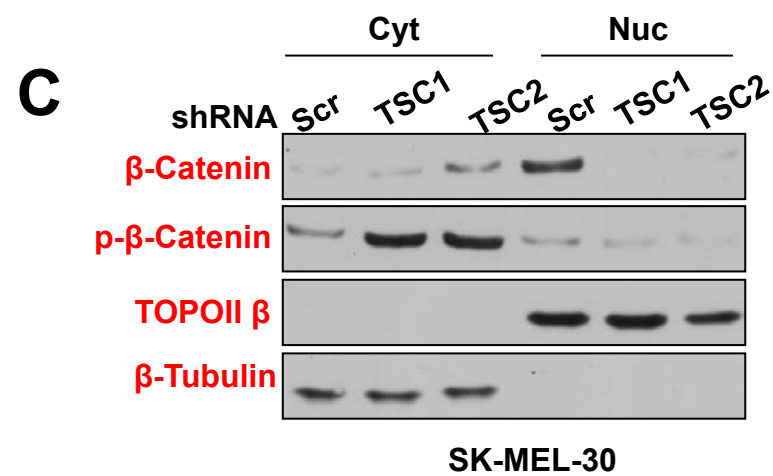

All run on the same gel, no extra loading needed

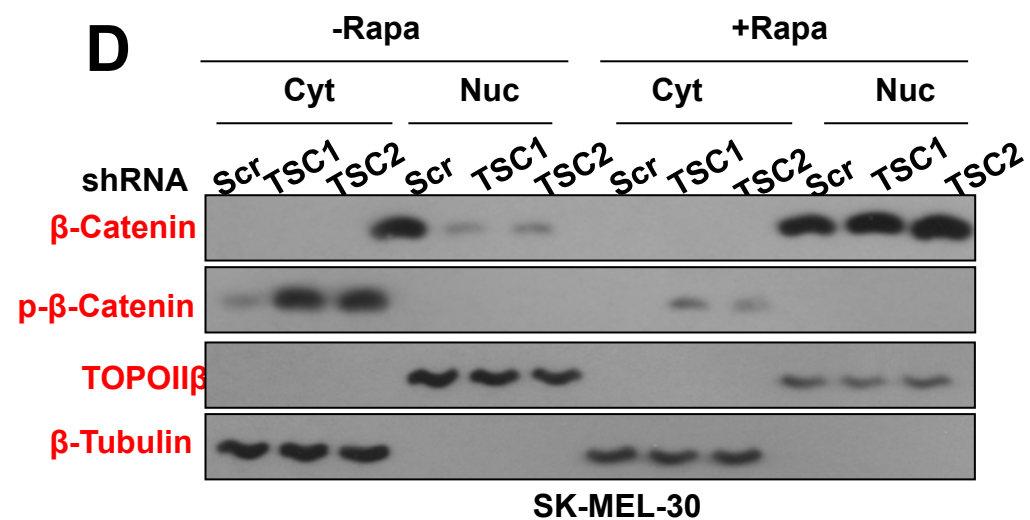

All run on the same gel, no extra loading needed

Blots were cut for different antibody staining and exposed on the same film

# Full unedited gel for Figure S3C&D

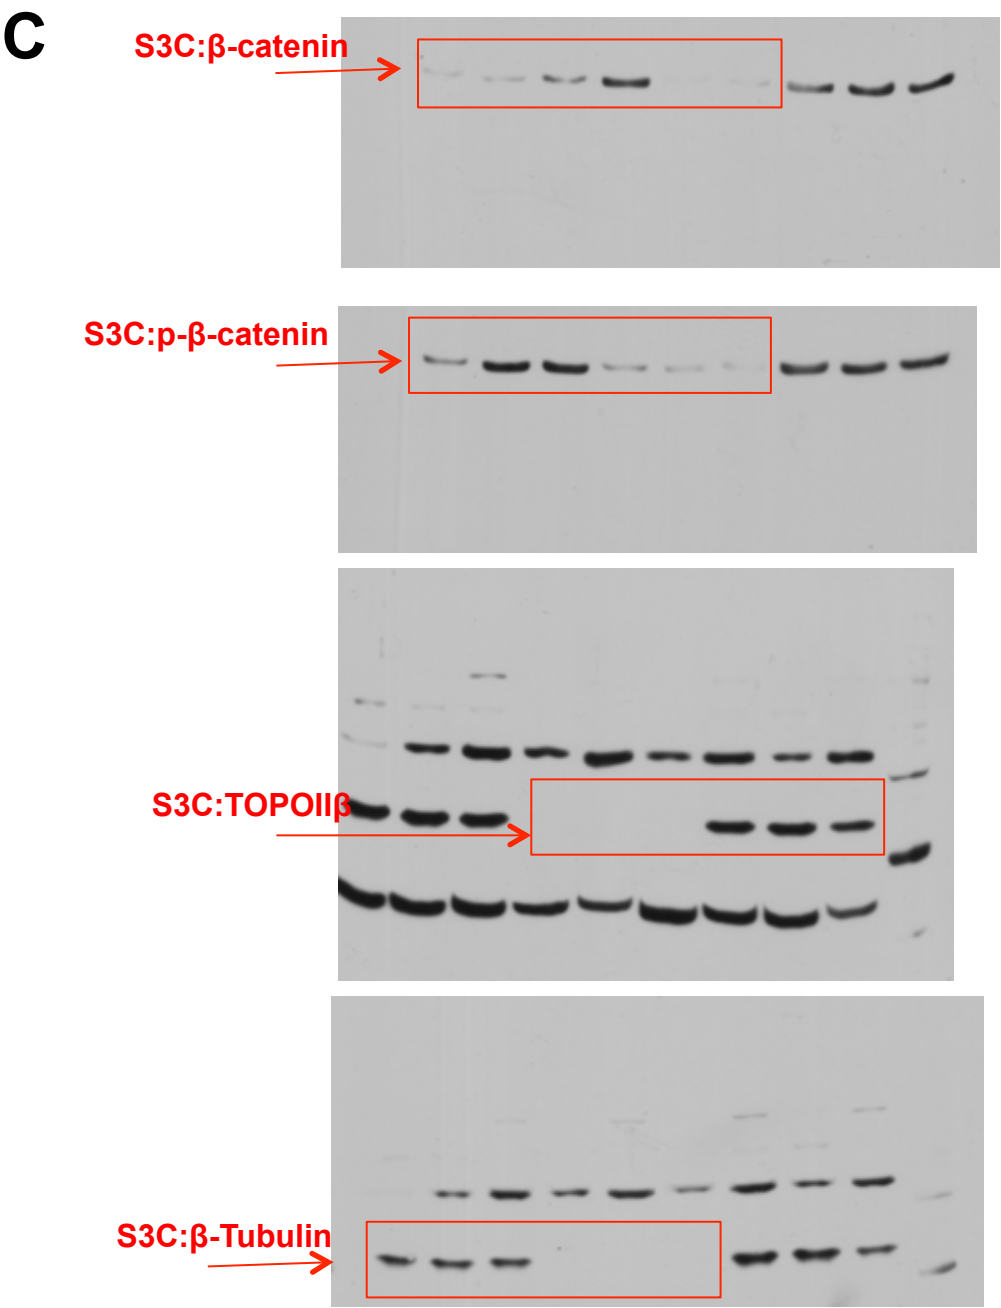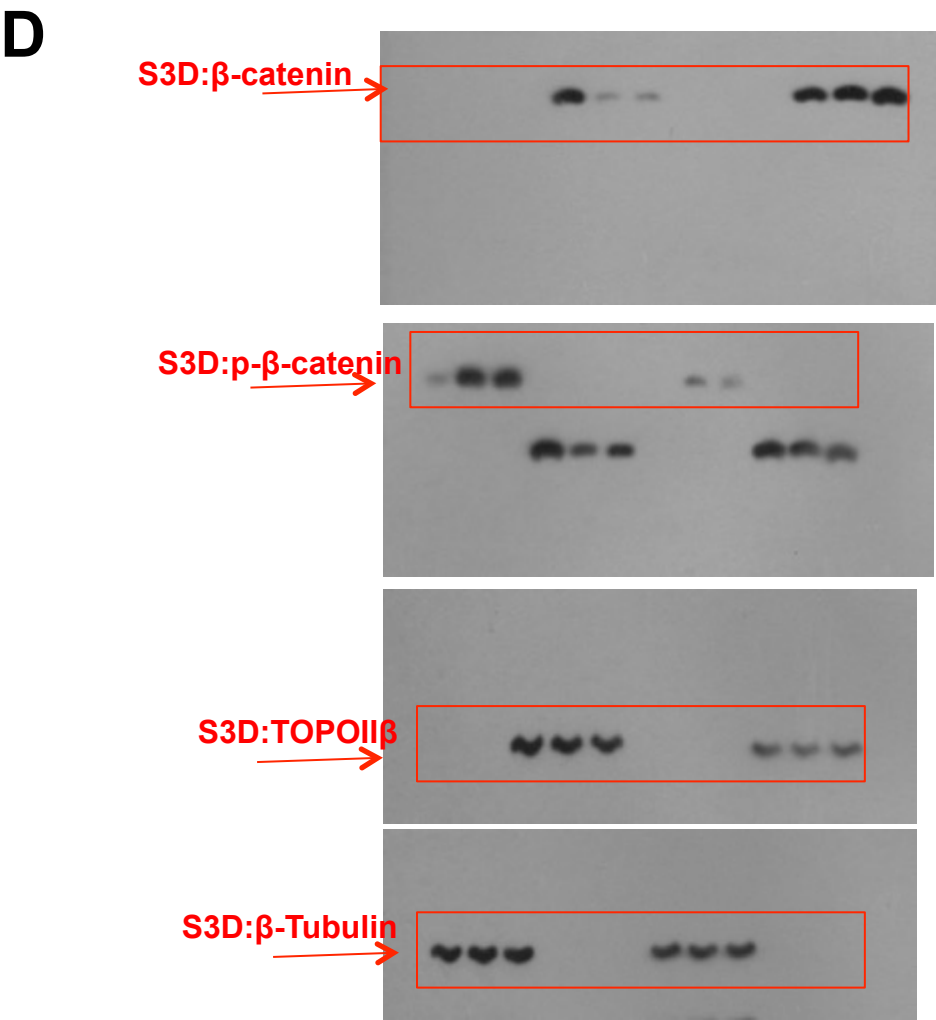

Figure S3

Loading controls for parallel gels in figure S3C&D

All run on the same gel, no  
extra loading needed

A

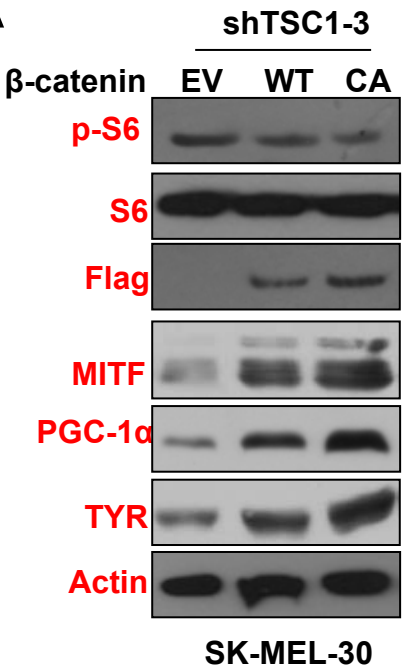

B

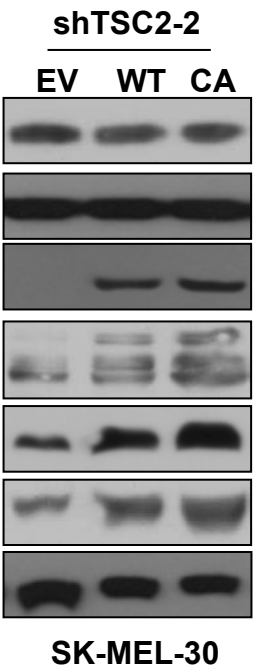

S6      Actin

Run on same gel, **Actin** in the figure was used as a loading control

parallel gel 1

p-S6 (left)

Run on same gel, **Actin** was used as a loading control, (see uncropped gel image

parallel gel 2

p-S6 (right)

Run on same gel, **Actin** was used as a loading control, (see uncropped gel image

parallel gel 3

Flag

Run on same gel, **Actin** was used as a loading control, (see uncropped gel image

parallel gel 4

MITF

Run on same gel, **Actin** was used as a loading control, (see uncropped gel image

parallel gel 5

PGC-1 $\alpha$

Run on same gel, **Actin** was used as a loading control, (see uncropped gel image

parallel gel 6

TYR

Run on same gel, **Actin** was used as a loading control, (see uncropped gel image

Figure S4

# Full unedited gel for Figure S4AB

Blots were cut for different antibody staining and exposed on the same film

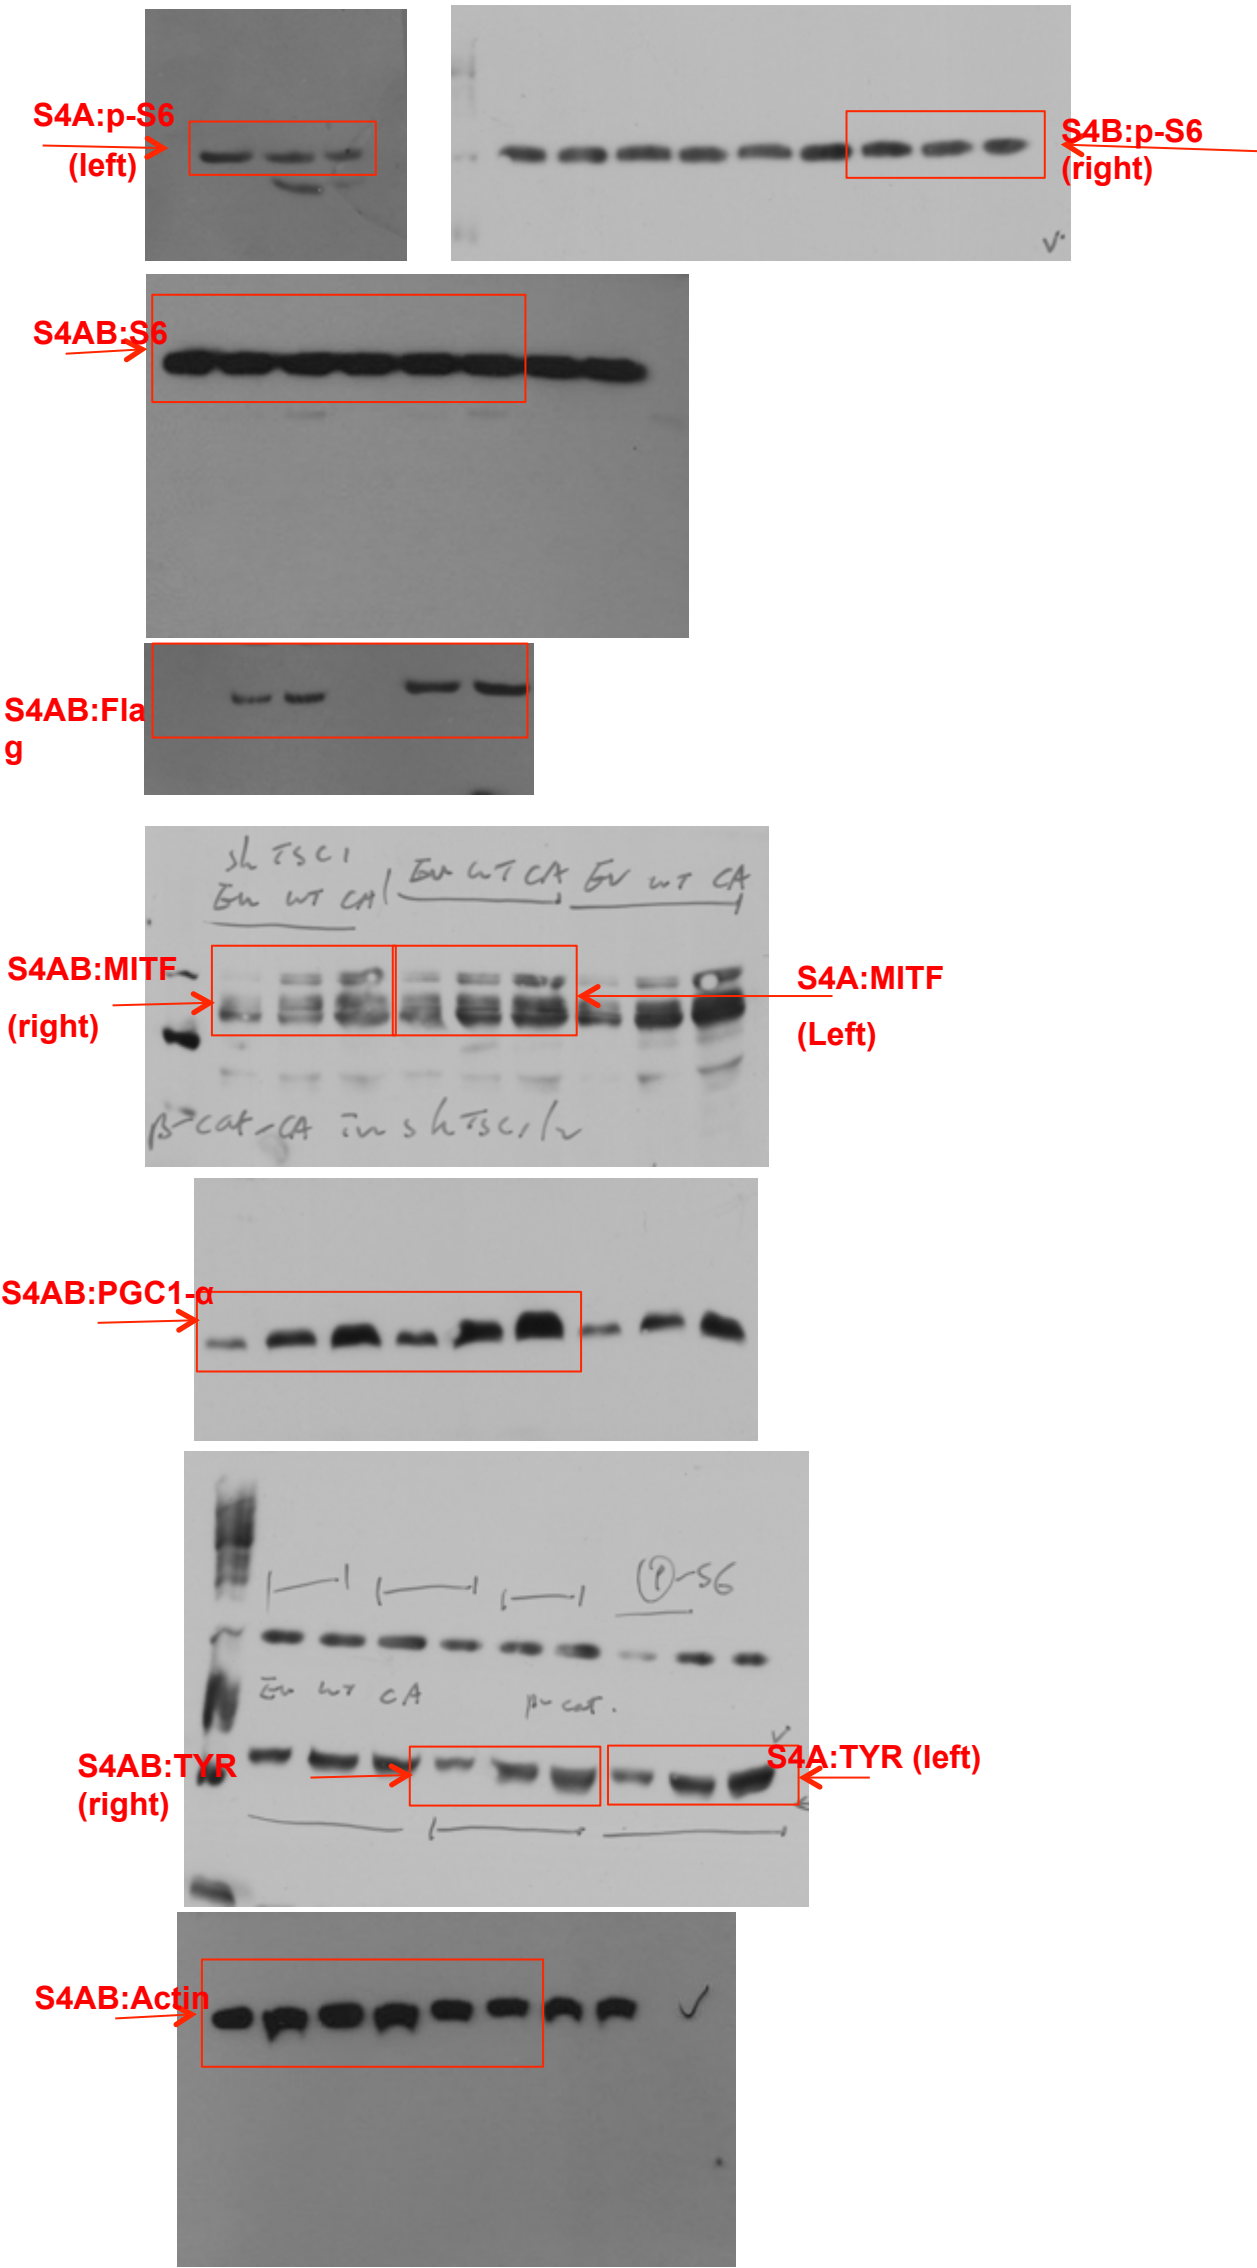

Figure S4

# Loading controls for parallel gels in figure S4AB

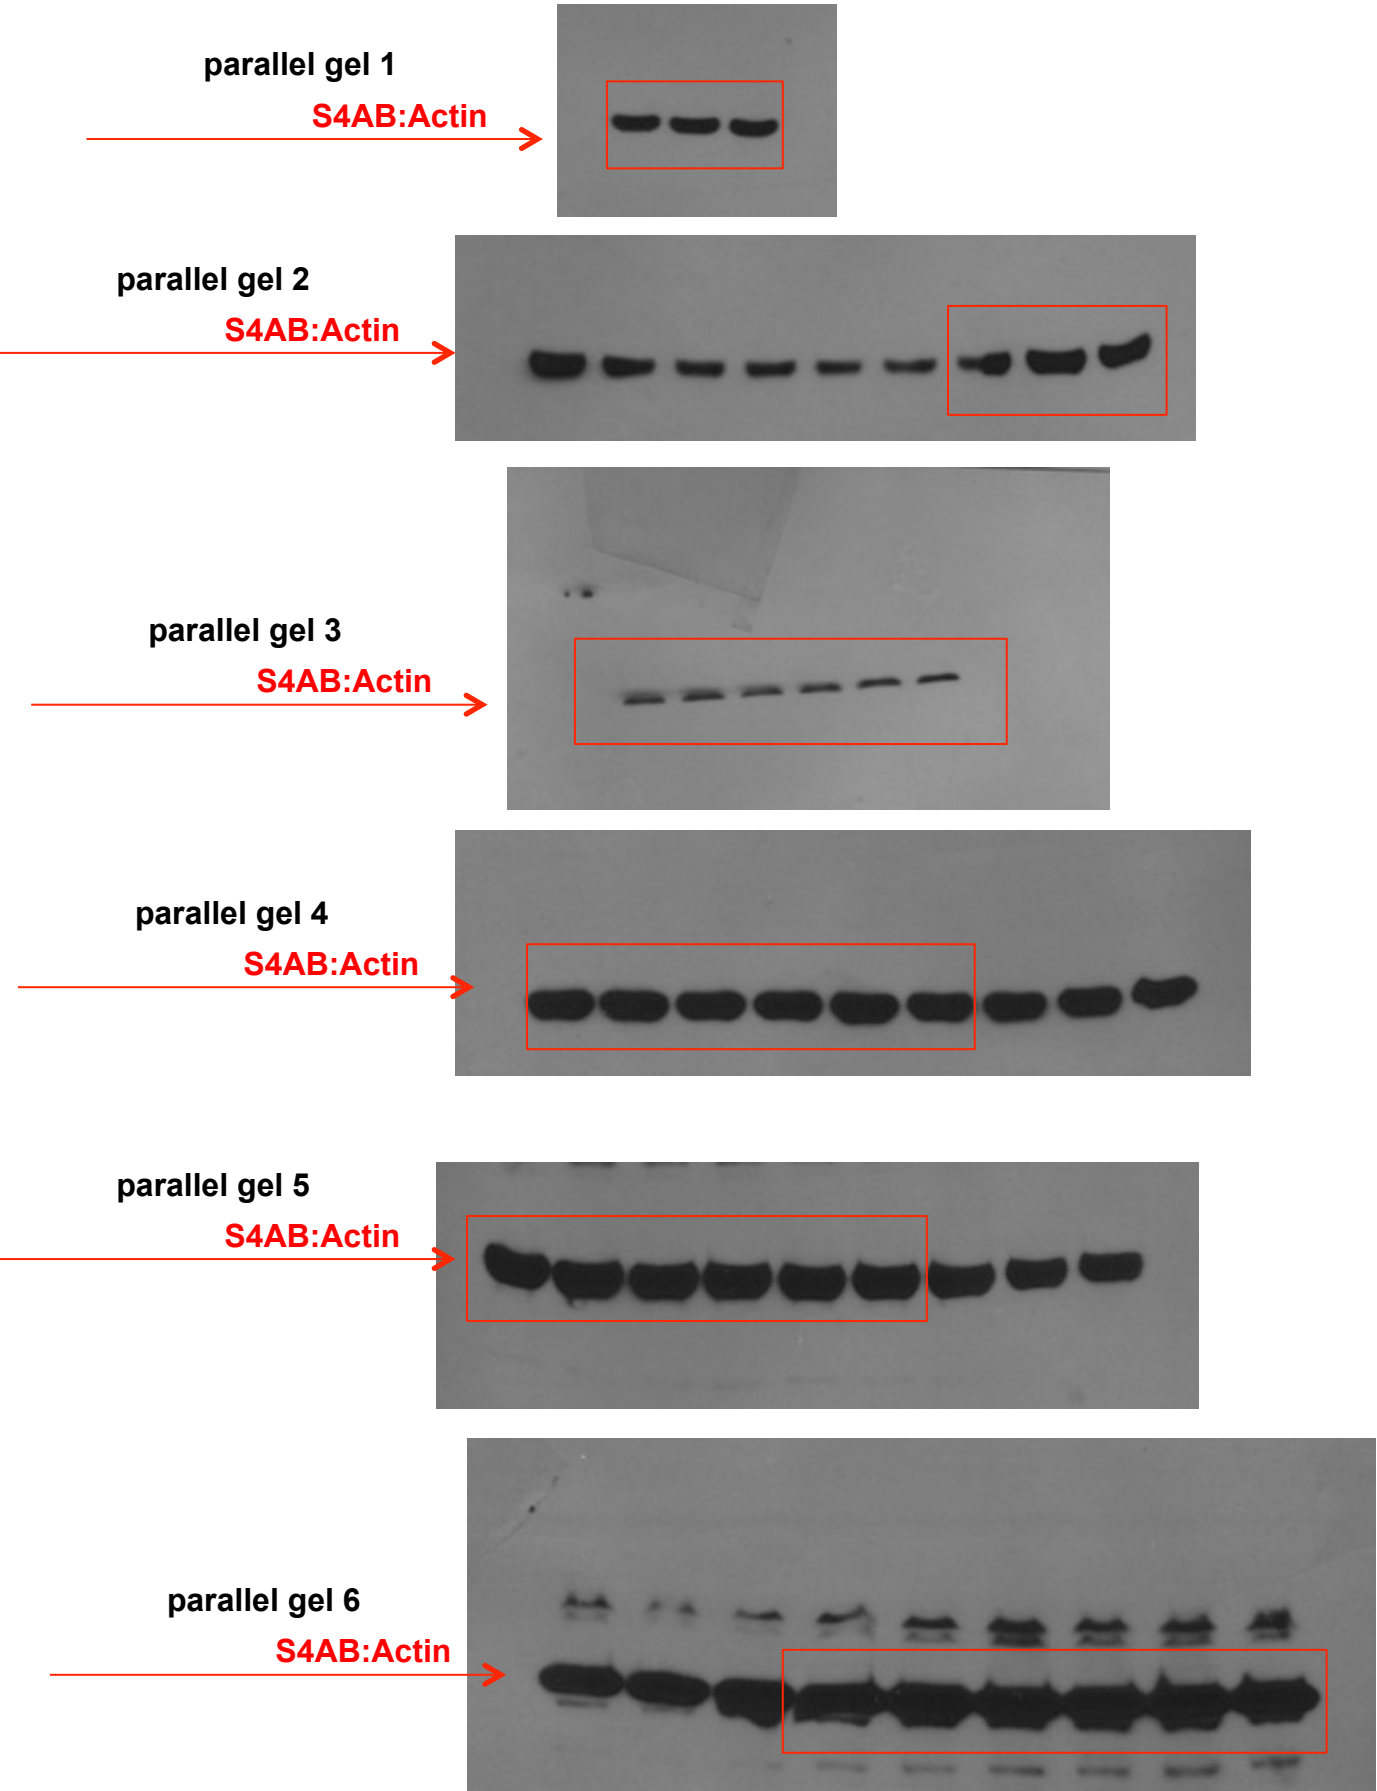

4E

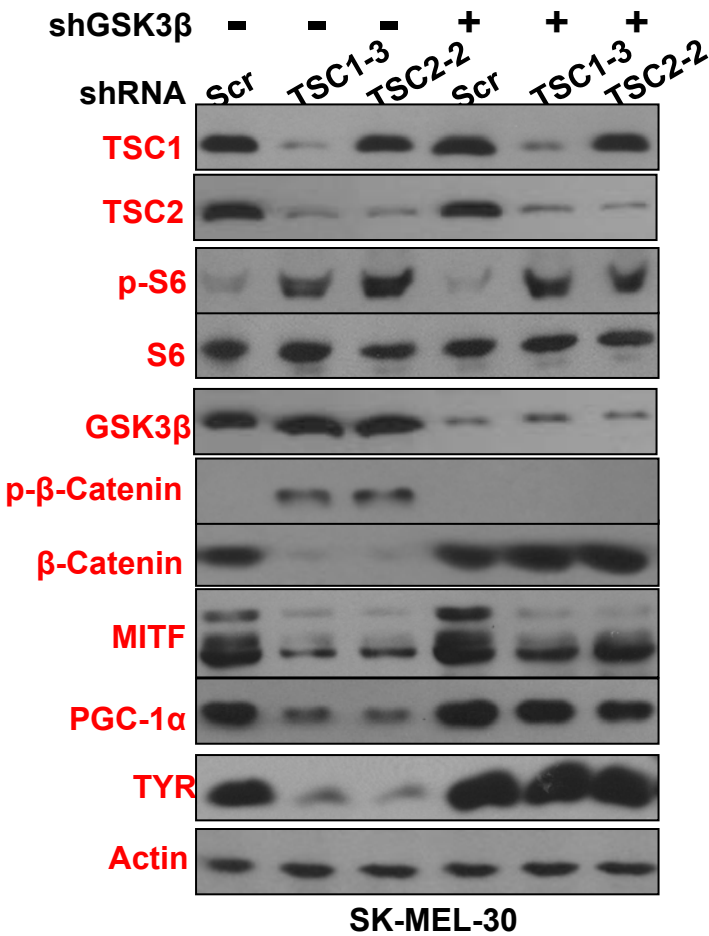

TSC1 TSC2 S6 GSK3β MITF PGC-1α

Run on same gel, S6 in the figure was used as a loading control

parallel gel 1

p-S6

Run on same gel, Actin was used as a loading control, (see uncropped gel image

parallel gel 2

p-β-Catenin

Run on same gel, Actin was used as a loading control, (see uncropped gel image

parallel gel 3

β-Catenin

Run on same gel, Actin was used as a loading control, (see uncropped gel image

parallel gel 4

TYR

Run on same gel, Actin was used as a loading control, (see uncropped gel image

parallel gel 5

Actin

Run on same gel, Actin in the figure was used as a loading control, no extra loading needed

# Full unedited gel for Figure S4E

E

Blots were cut for different antibody staining and exposed on the same film

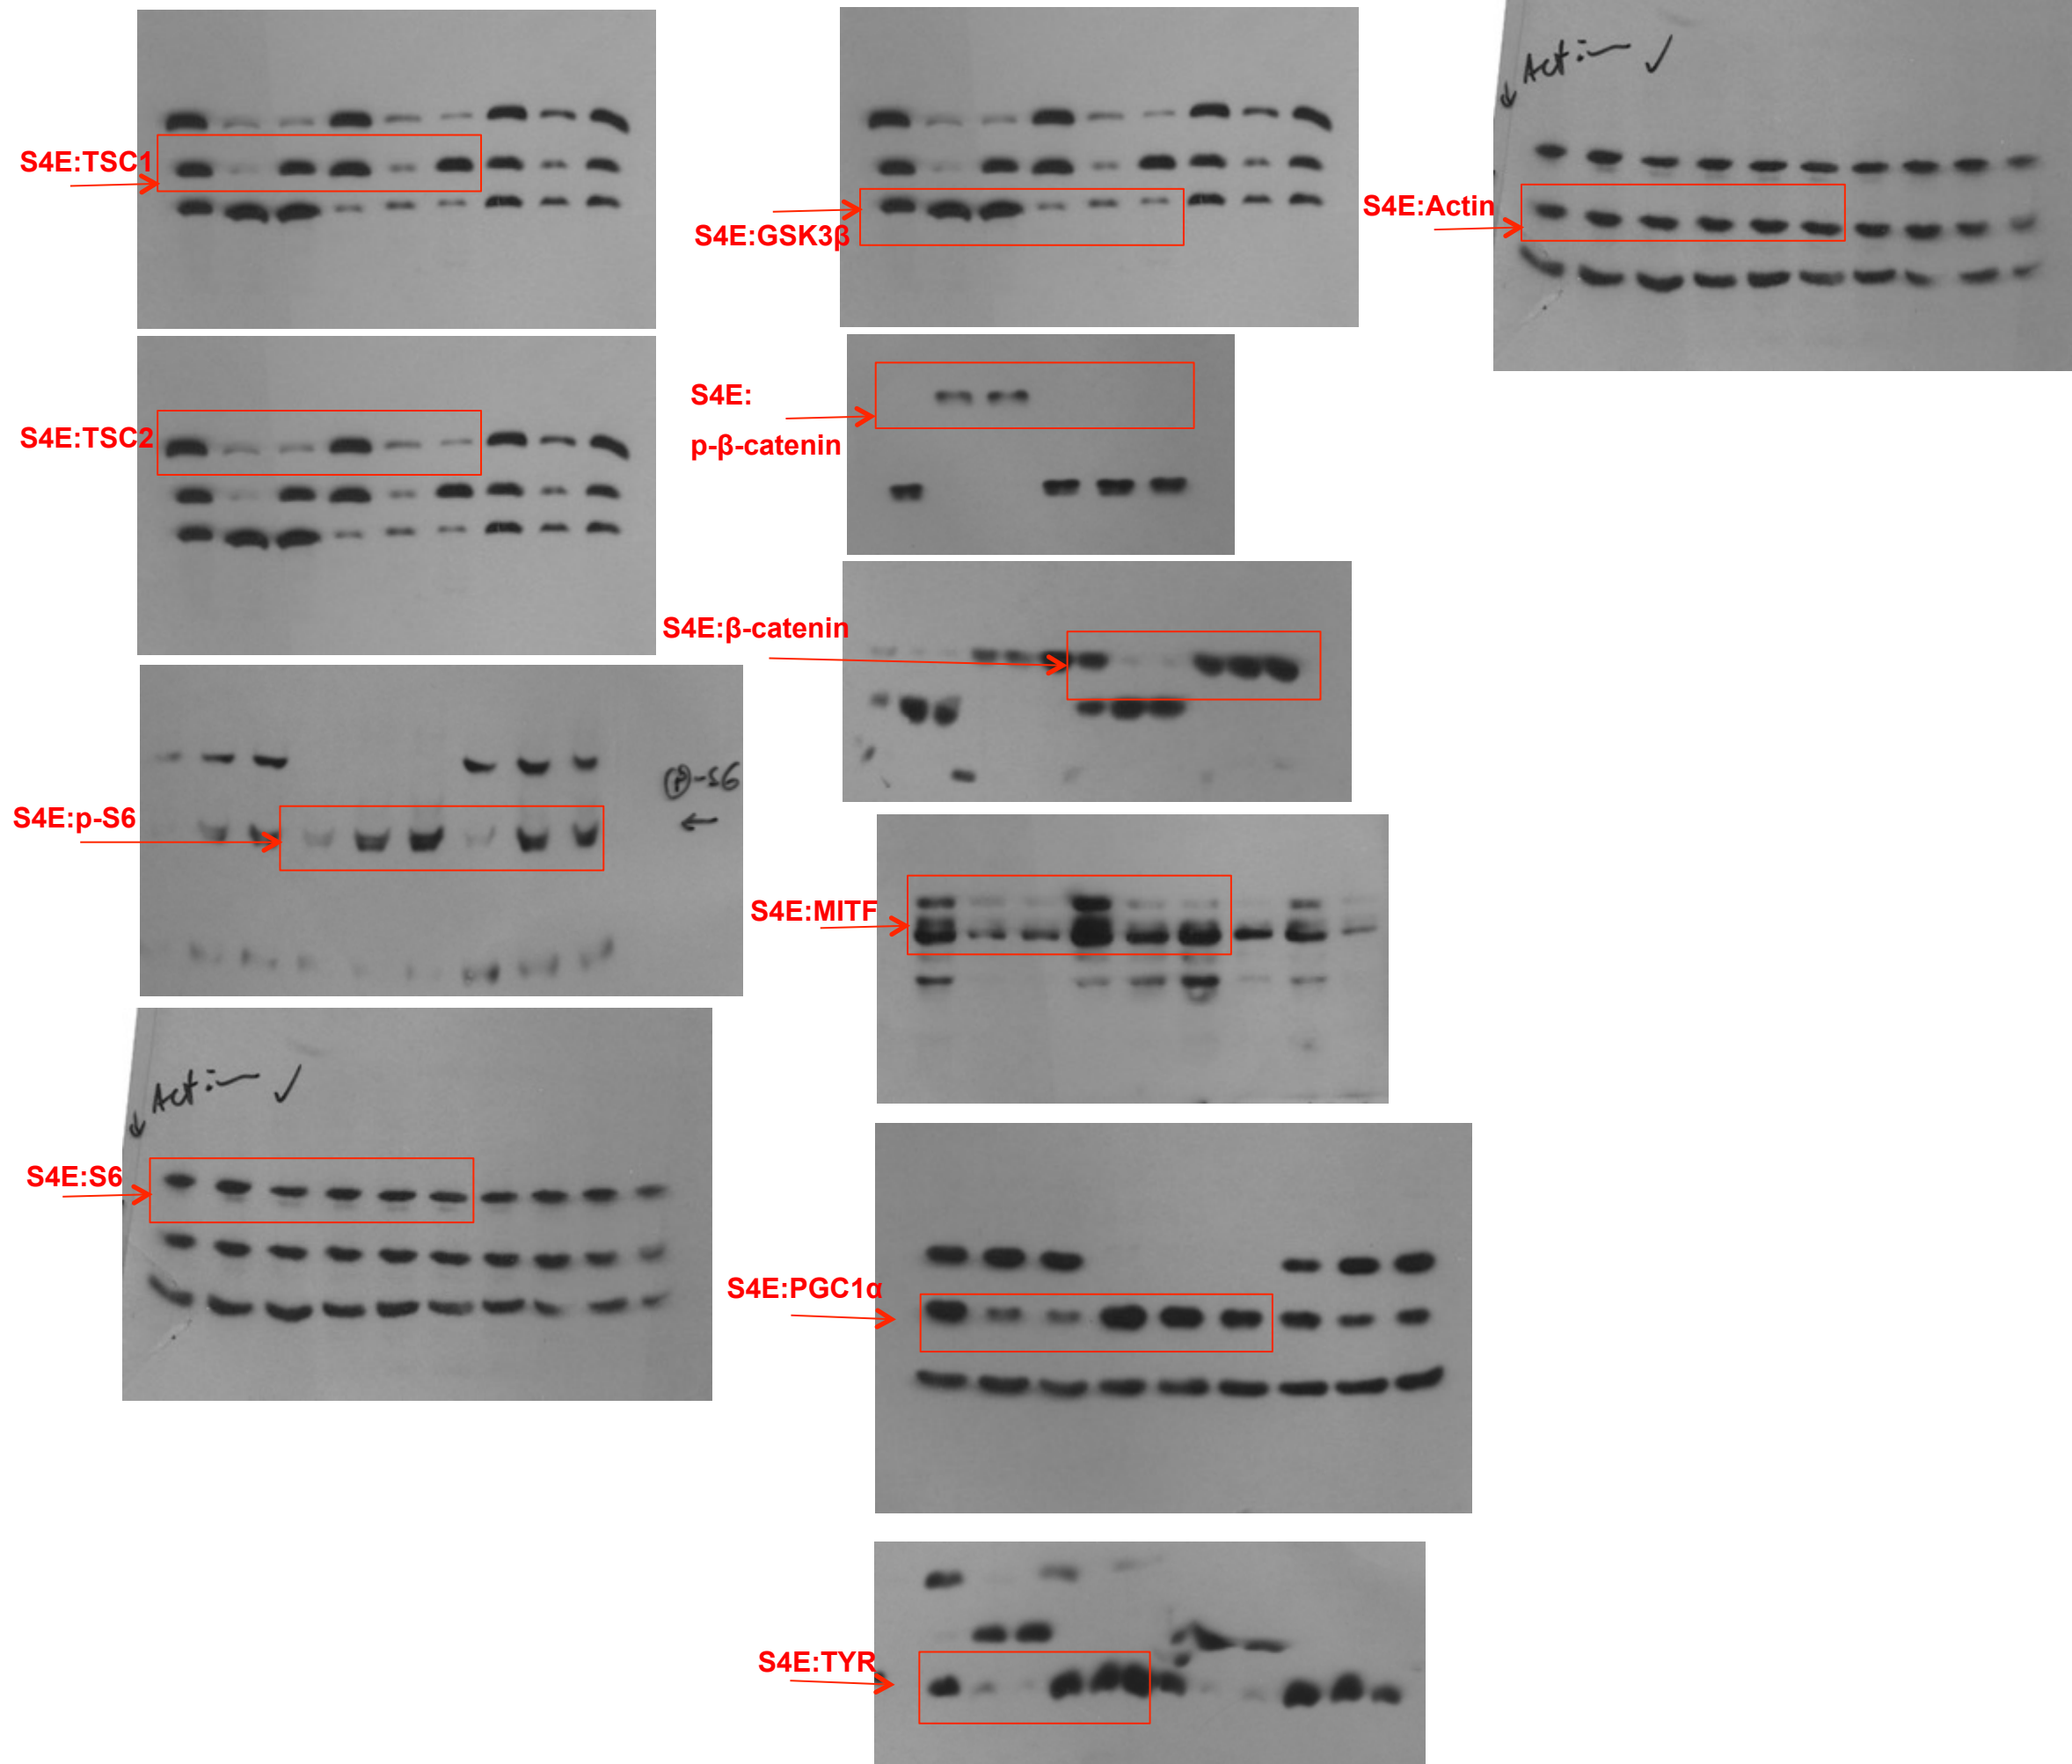

Figure S4



# Loading controls for parallel gels in figure S4E

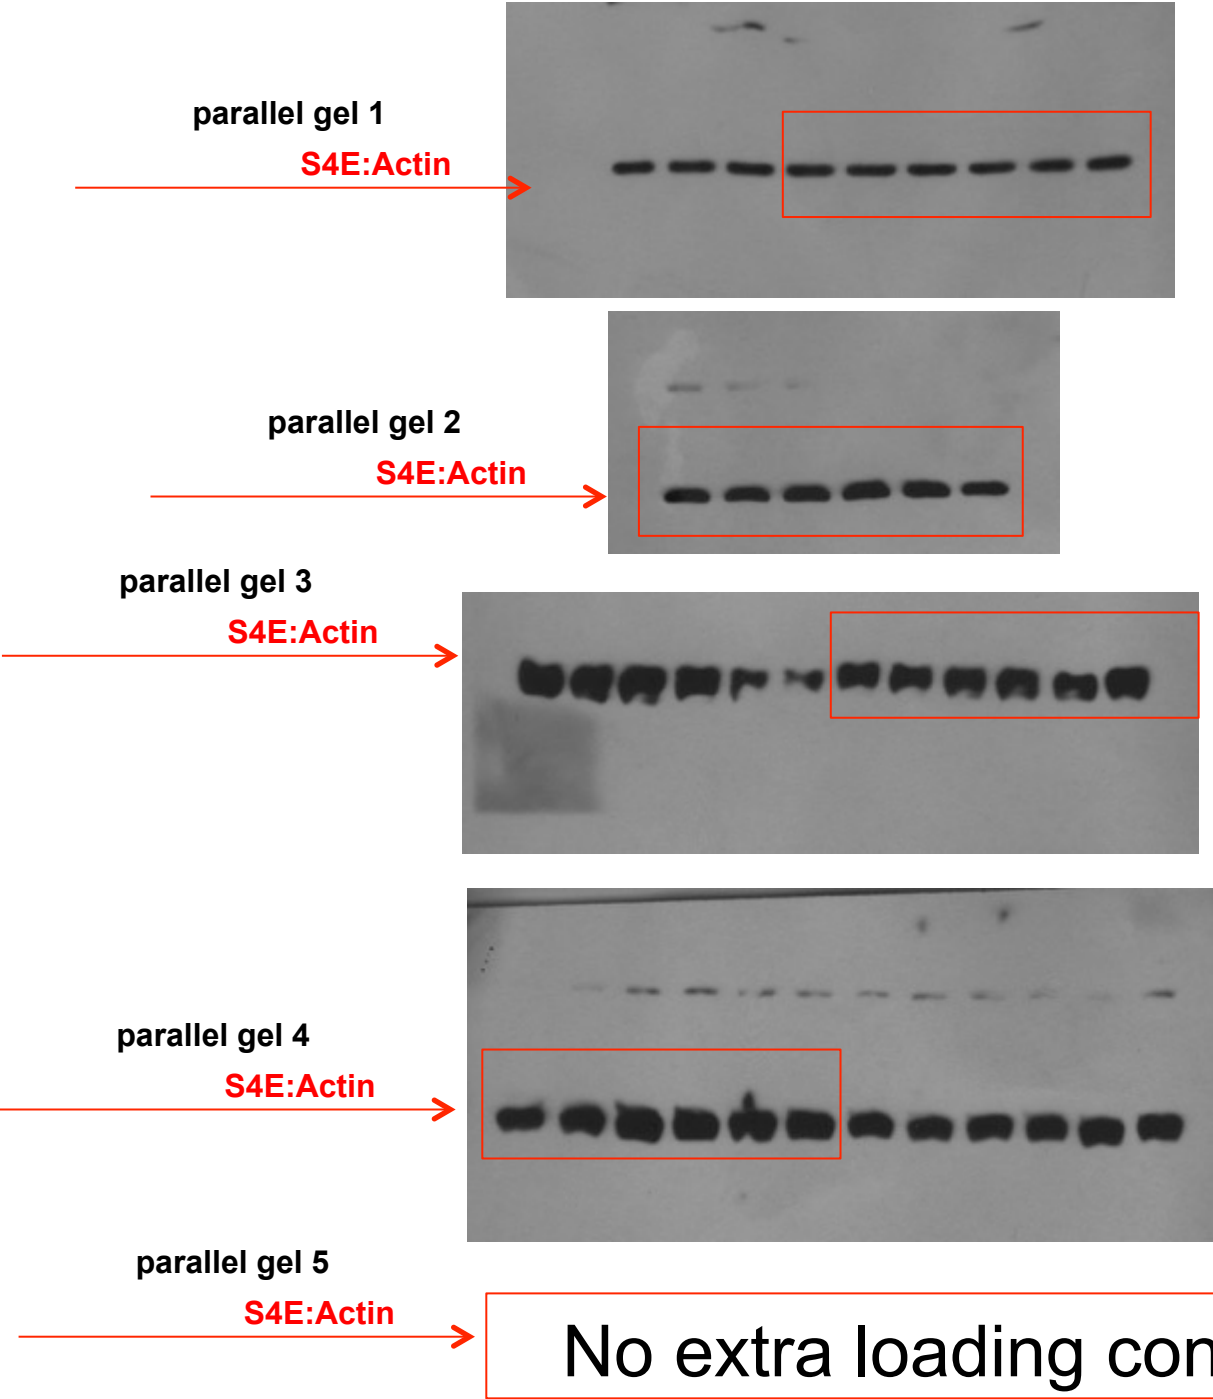

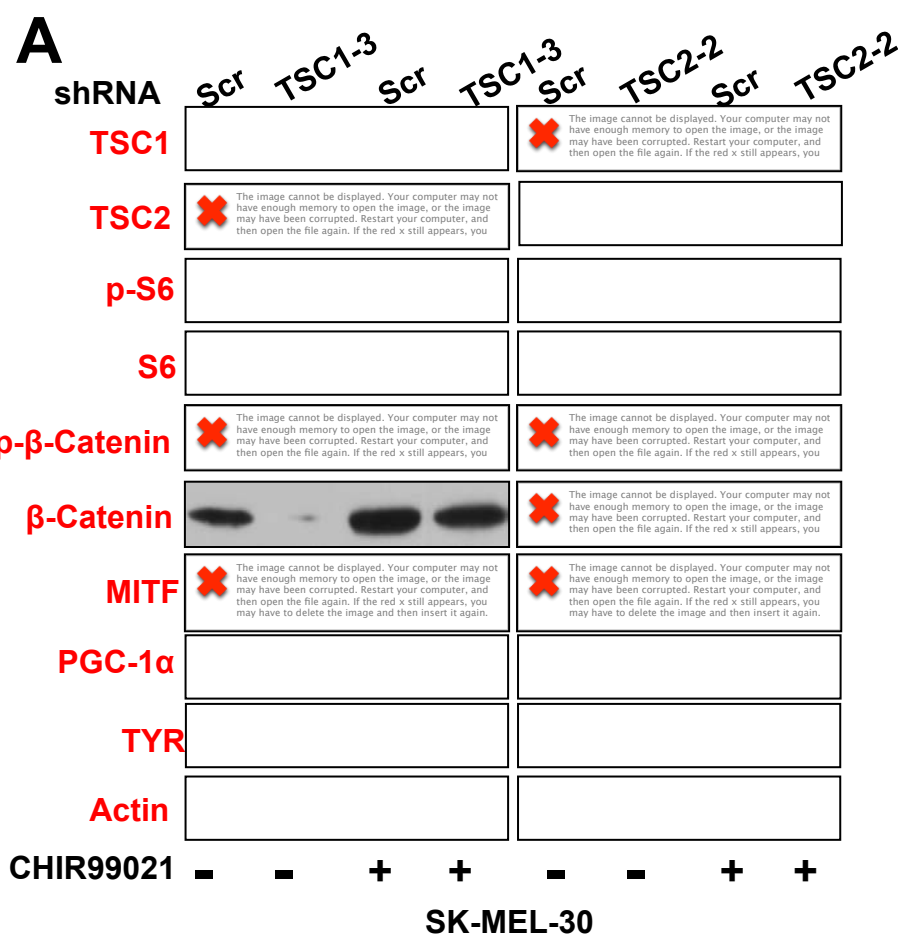

p-β-Catenin   β-Catenin   MITF   PGC-1α   Actin

Run on same gel, **Actin** in the figure was used as a loading control

parallel gel 1

TSC1 (left)   TSC2 (left)   TYR (left)

Run on same gel, **Actin** was used as a loading control, (see uncropped gel image

parallel gel 2

TSC1 (right)

Run on same gel, **Actin** was used as a loading control, (see uncropped gel image

parallel gel 3

TSC2 (right)

Run on same gel, **Actin** was used as a loading control, (see uncropped gel image

parallel gel 4

p-S6 (left)

Run on same gel, **Actin** was used as a loading control, (see uncropped gel image

parallel gel 5

p-S6 (right)

Run on same gel, **Actin** was used as a loading control, (see uncropped gel image

parallel gel 6

TYR (right)

Run on same gel, **Actin** was used as a loading control, (see uncropped gel image

parallel gel 7

S6

Run on same gel, **S6** in the figure was used as a loading control, no extra loading needed

Figure S5

**A** Full unedited gel for Figure S5A

**Blots were cut for different antibody staining and exposed on the same film**

**S5A:TSC1**  
  
**(Left)**

**S5A:TSC1**  
**(Right)** →

**S5A:TSC2**  
(Left) →

**S5A:TSC2**  
→  
(Right)

**S5A:p-S6**  
(Left) 

**S5A:p-S6**  
**(Right)** 

Left

S5A:S6 →

**Right**

**S5A:TYR**  
(Left) →

**S5A:p- $\beta$ -catenin** →

**S5A:TYR**  
(Right) →

**A:  $\beta$ -Catenin**



Western blot analysis of  $\beta$ -catenin levels. The blot shows a single band for  $\beta$ -catenin in each lane. The intensity of the band decreases as the concentration of the treatment increases from 0 to 800 nM.

| Treatment | $\beta$ -Catenin |
|-----------|------------------|
| control   | Strong band      |
| 100nM     | Medium band      |
| 200nM     | Medium band      |
| 400nM     | Medium band      |
| 800nM     | Weak band        |

**S5A:Actin**

**S5A:MITF** →

**S5A:PGC-1 $\alpha$**

### Figure S5

# Loading controls for parallel gels in figure S5A

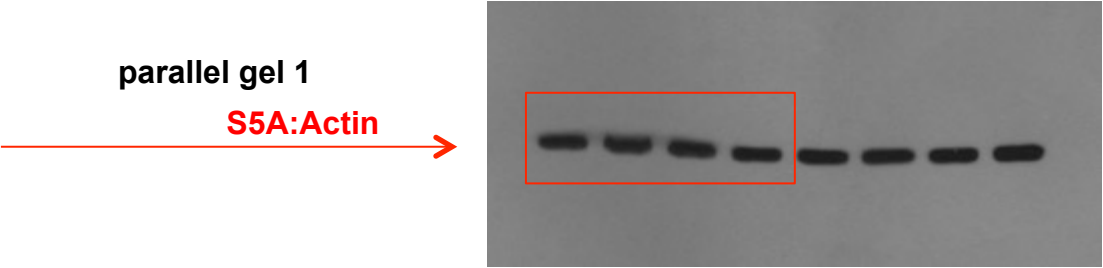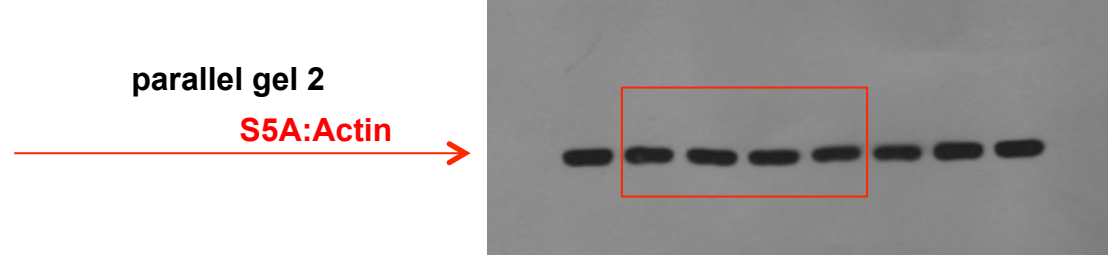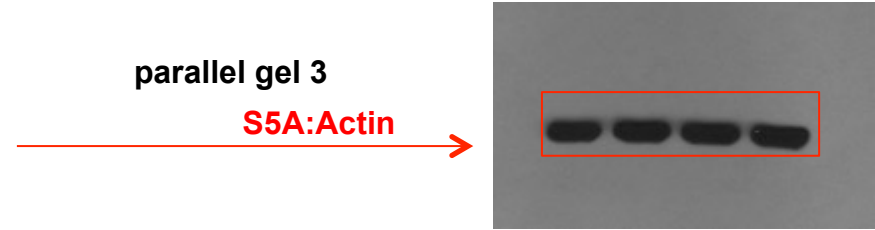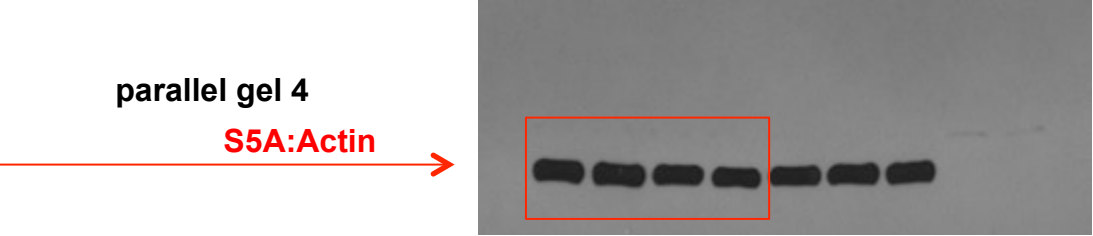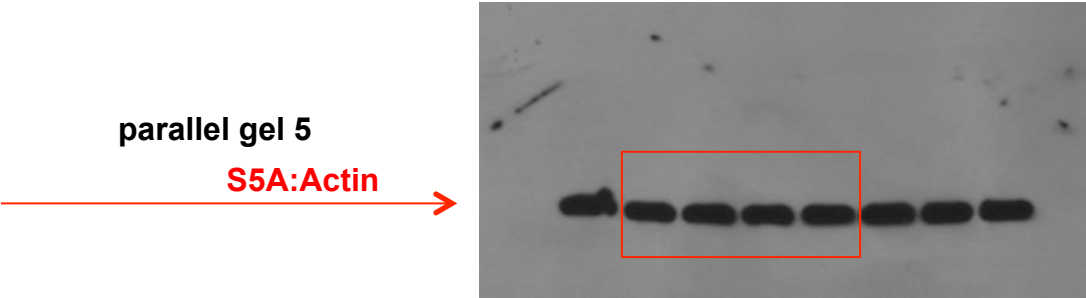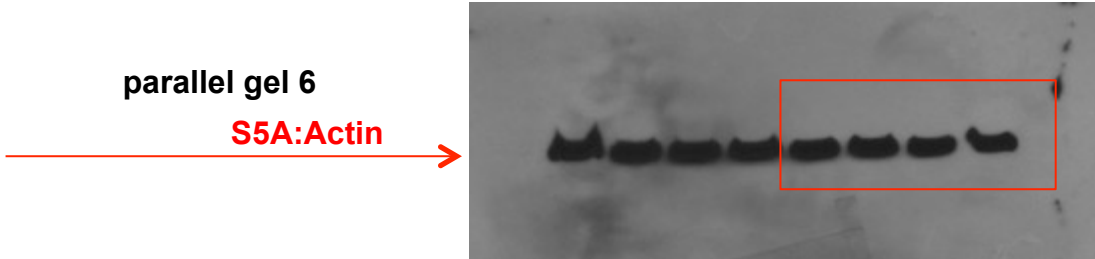

parallel gel 7

S5A:Actin

No extra loading control needed

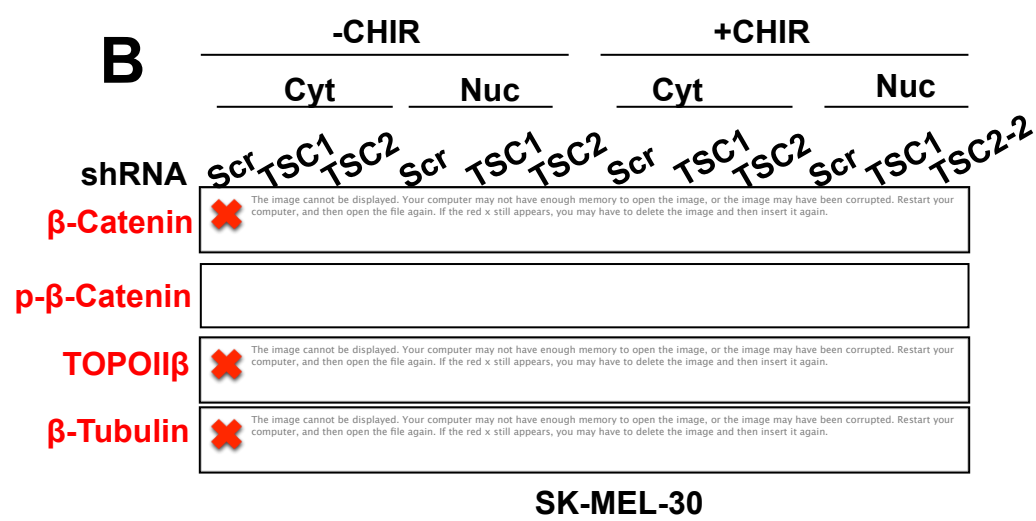

All run on the same gel, no extra loading needed

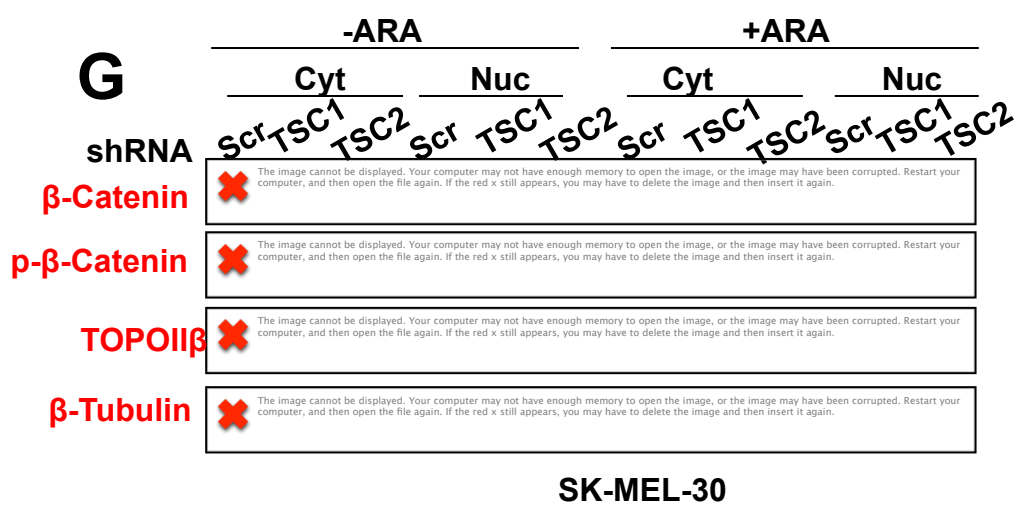

All run on the same gel, no extra loading needed

Figure S5

Blots were cut for different antibody staining and exposed on the same film

# Full unedited gel for Figure S5B&G

**B**

S5B:β-catenin

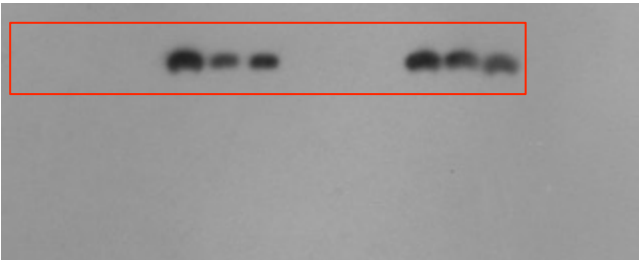

S5B:p-β-catenin

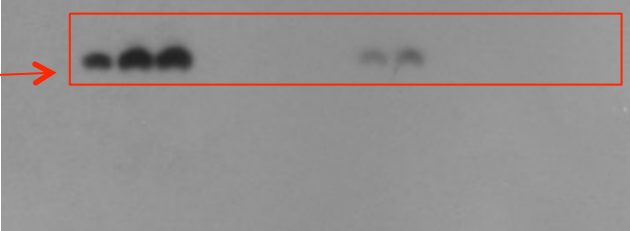

S5B:TOP2IIβ

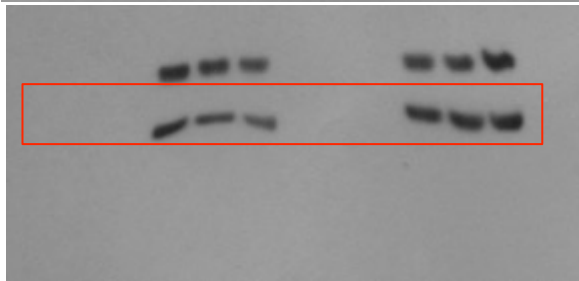

S5B:β-Tubulin

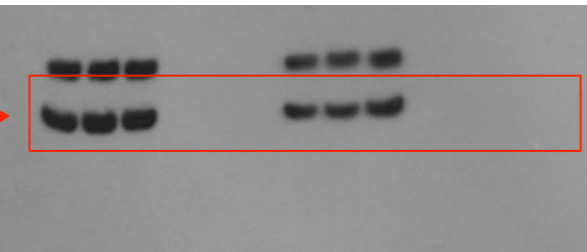

**G**

S5G:β-catenin

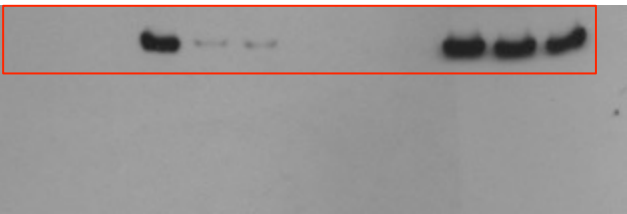

S5G:p-β-catenin

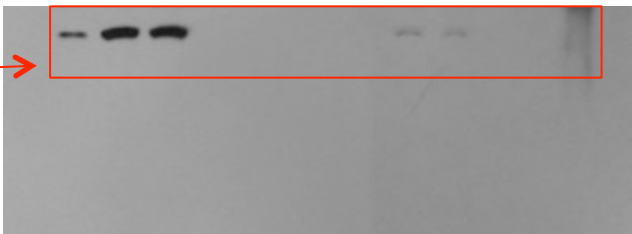

S5G:TOP2IIβ

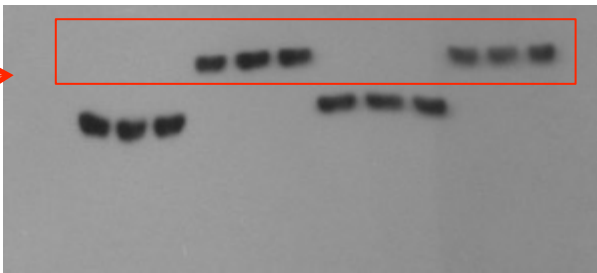

S5G:β-Tubulin

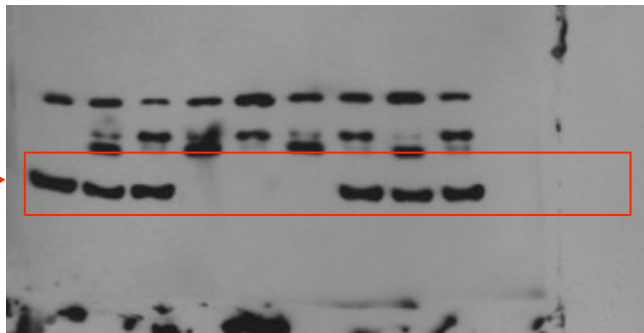

Figure S5

Loading controls for parallel gels in figure S5B&G

All run on the same gel, no  
extra loading needed

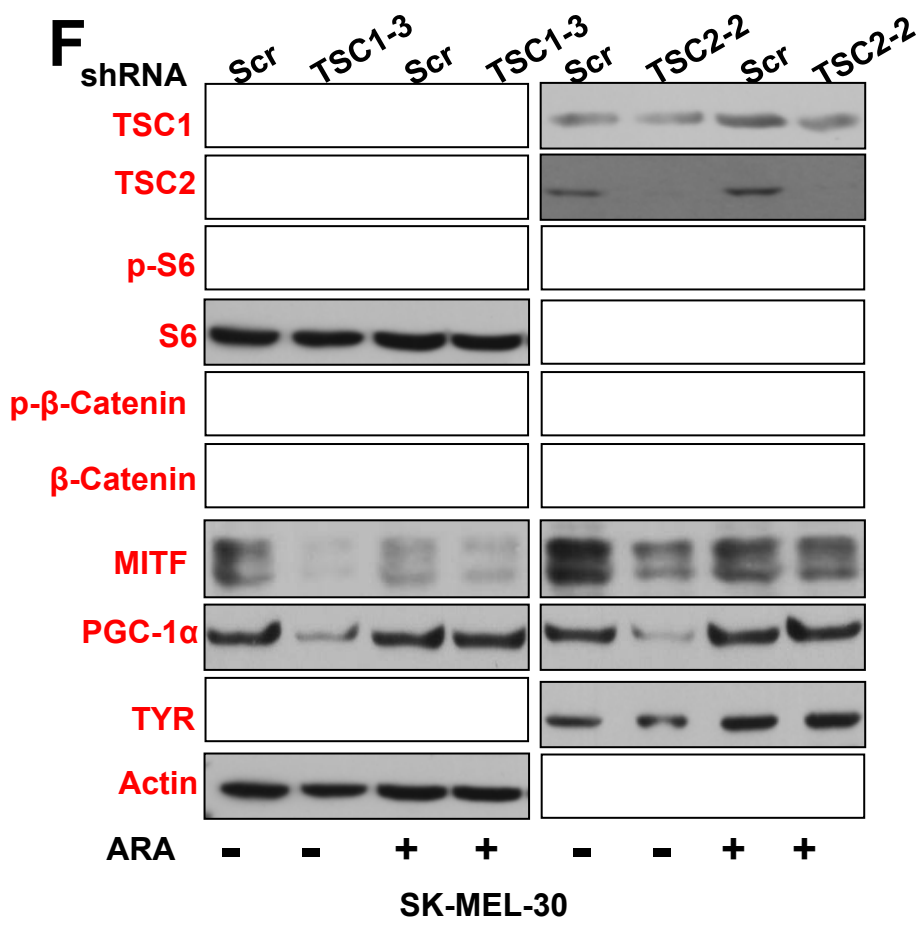

**S6      β-Catenin      Actin**

---

Run on same gel, **Actin** in the figure was used as a loading control

parallel gel 1

**TSC2   p-S6   p-β-Catenin**

---

Run on same gel, **Actin** was used as a loading control, (see uncropped gel image

parallel gel 2

**TSC1 (left)**

---

Run on same gel, **Actin** was used as a loading control, (see uncropped gel image

parallel gel 3

**TSC1 (right)**

---

Run on same gel, **Actin** was used as a loading control, (see uncropped gel image

parallel gel 4

**MITF (left)                      TYR (left)**

---

Run on same gel, **Actin** was used as a loading control, (see uncropped gel image

parallel gel 5

**MITF (right)**

---

Run on same gel, **Actin** was used as a loading control, (see uncropped gel image

parallel gel 6

**TYR (right)**

---

Run on same gel, **Actin** was used as a loading control, (see uncropped gel image

Figure S5



# Full unedited gel for Figure S5F

F

Blots were cut for different antibody staining and exposed on the same film

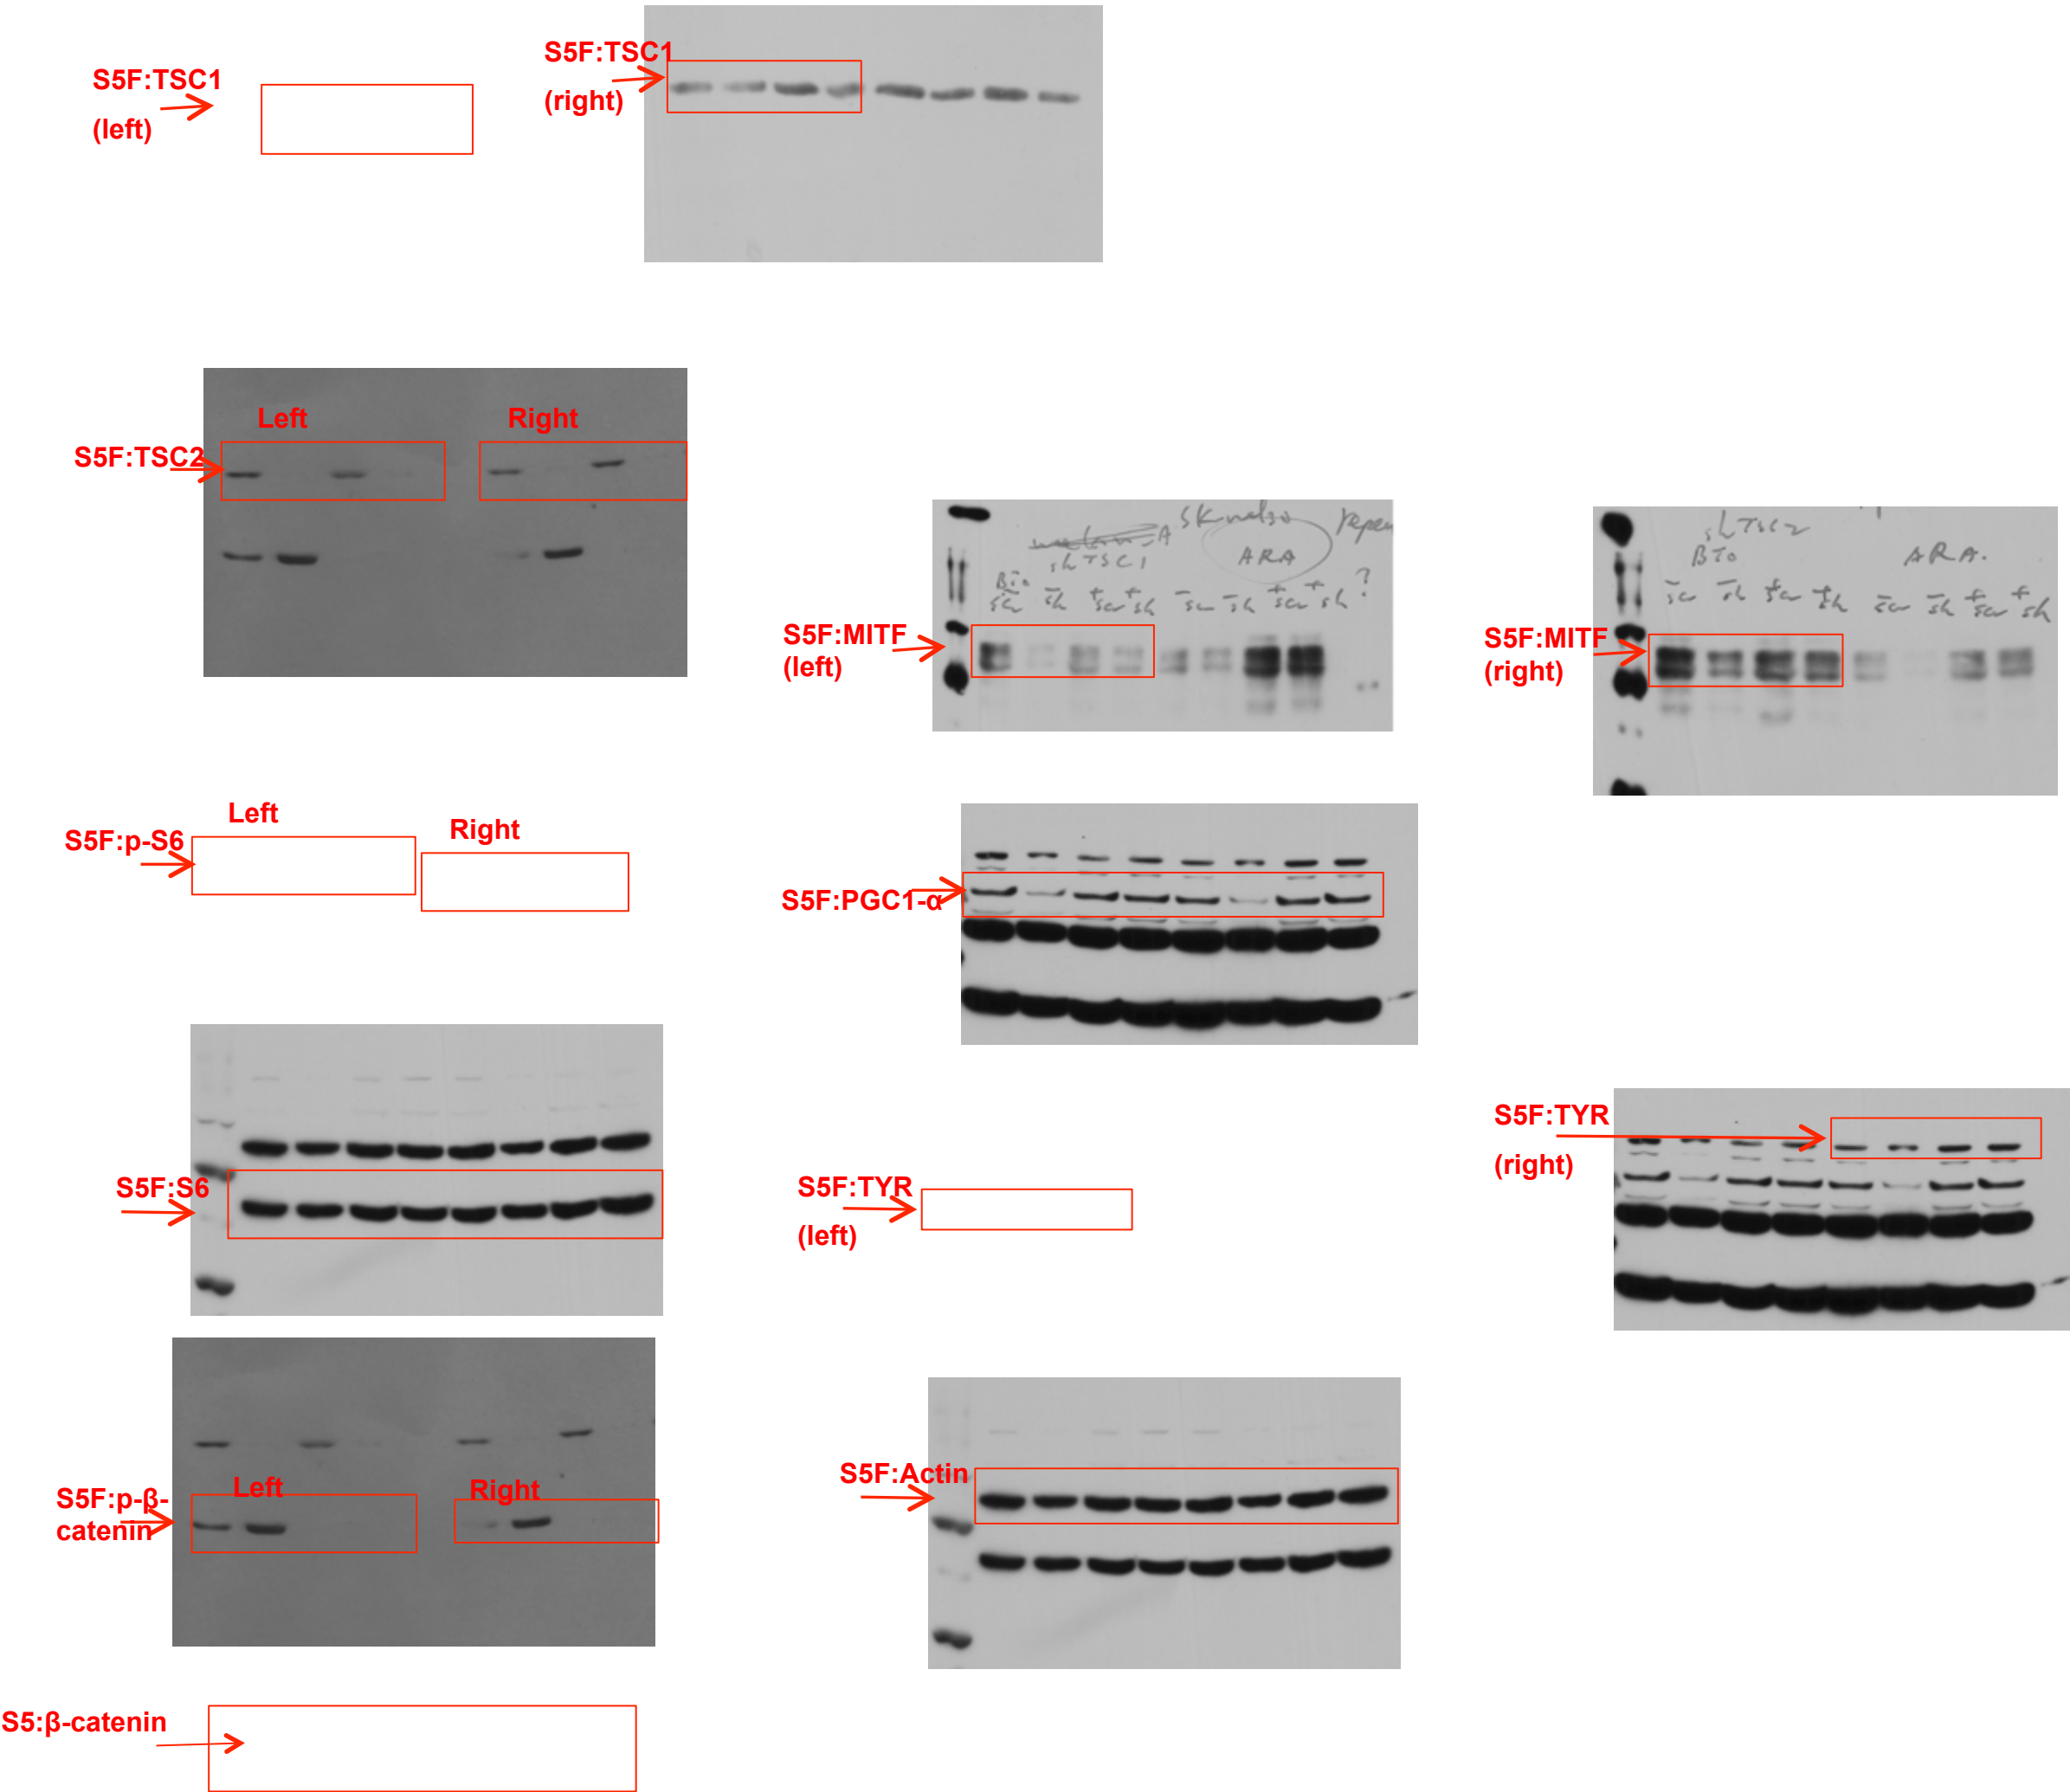

Figure S5

# Loading controls for parallel gels in figure S5F

parallel gel 1

S5F:Actin

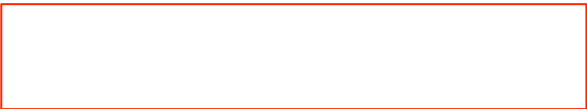

parallel gel 2

S5F:Actin

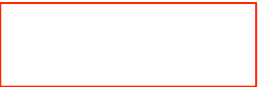

parallel gel 3

S5F:Actin

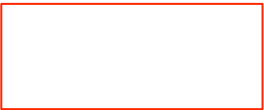

parallel gel 4

S5F:Actin

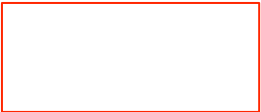

parallel gel 5

S5F:Actin

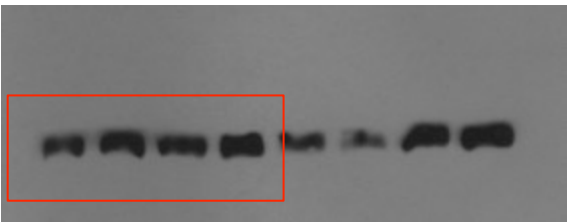

parallel gel 6

S5F:Actin

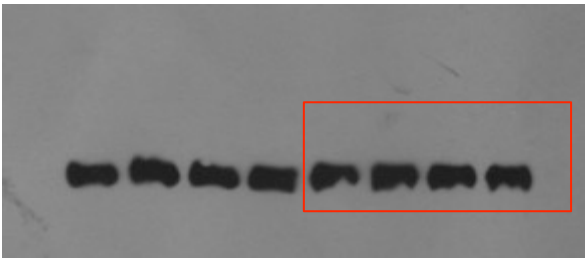

K

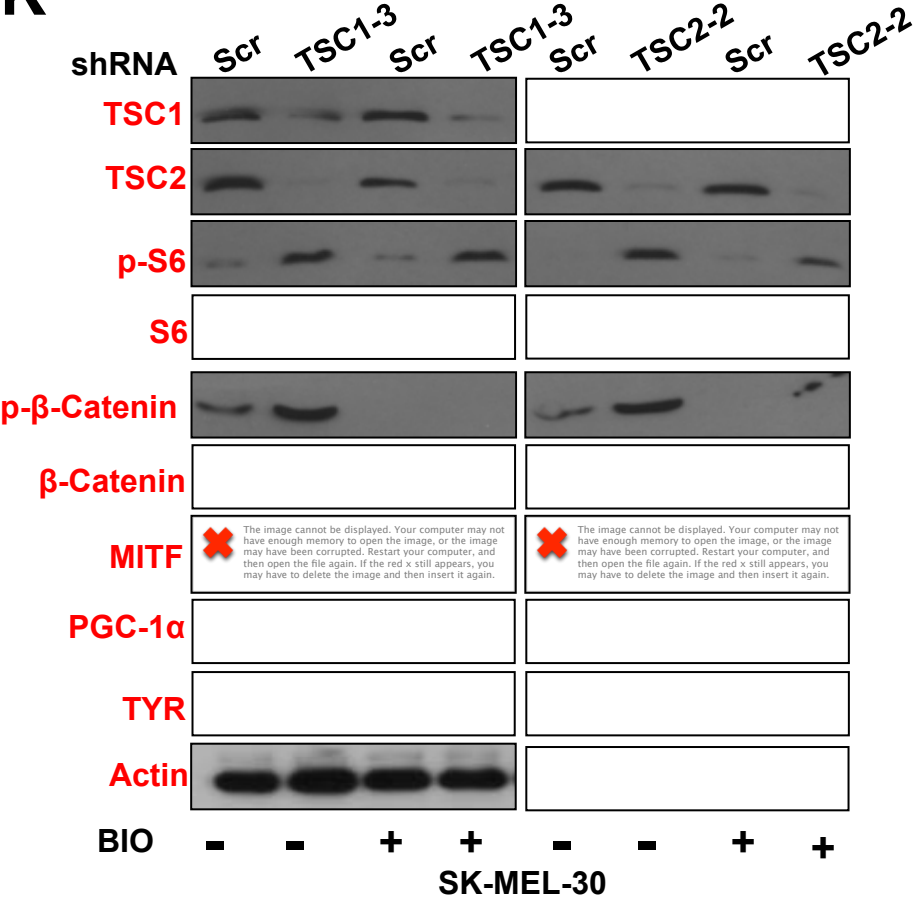

S6      β-Catenin      MITF      PGC-1α      TYR      Actin

---

Run on same gel, **Actin** in the figure was used as a loading control

parallel gel 1

**TSC1 (left)**

---

Run on same gel, **Actin** was used as a loading control, (see uncropped gel image

parallel gel 2

**TSC1 (right)**

---

Run on same gel, **Actin** was used as a loading control, (see uncropped gel image

parallel gel 3

**TSC2      p-S6      p-β-Catenin**

---

Run on same gel, **Actin** was used as a loading control, (see uncropped gel image

Figure S5

K

S5K:TSC1  
(Left) → 

S5K:TSC1  
(right) → 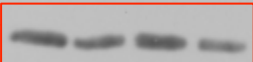

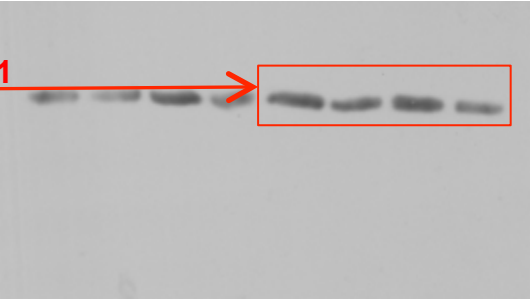

Blots were cut for different antibody staining and exposed on the same film

Full unedited gel for Figure S5K

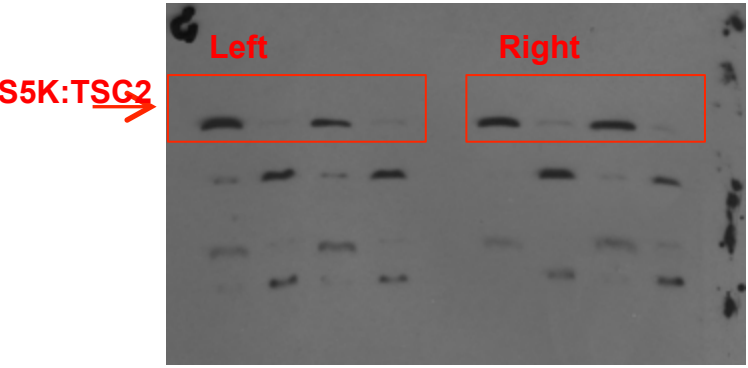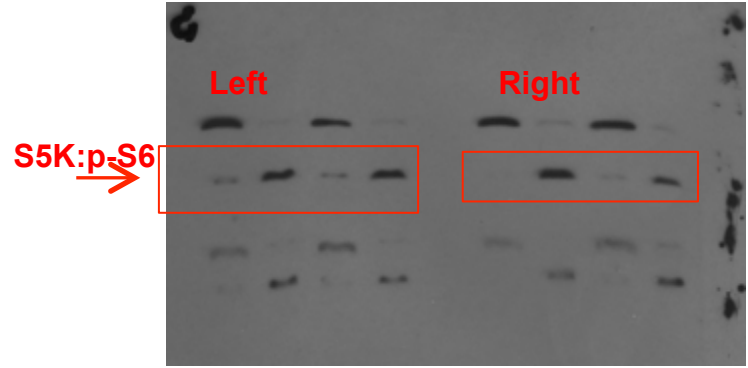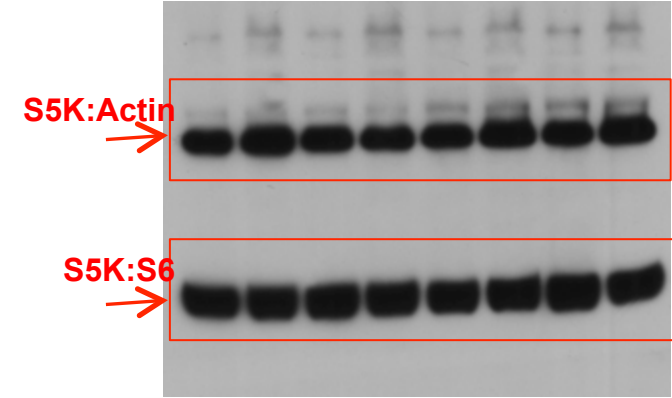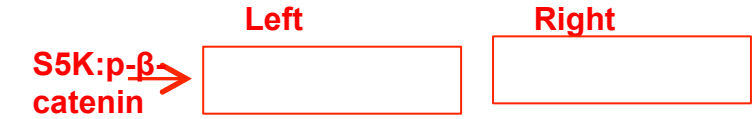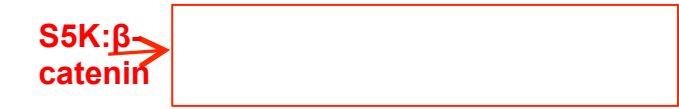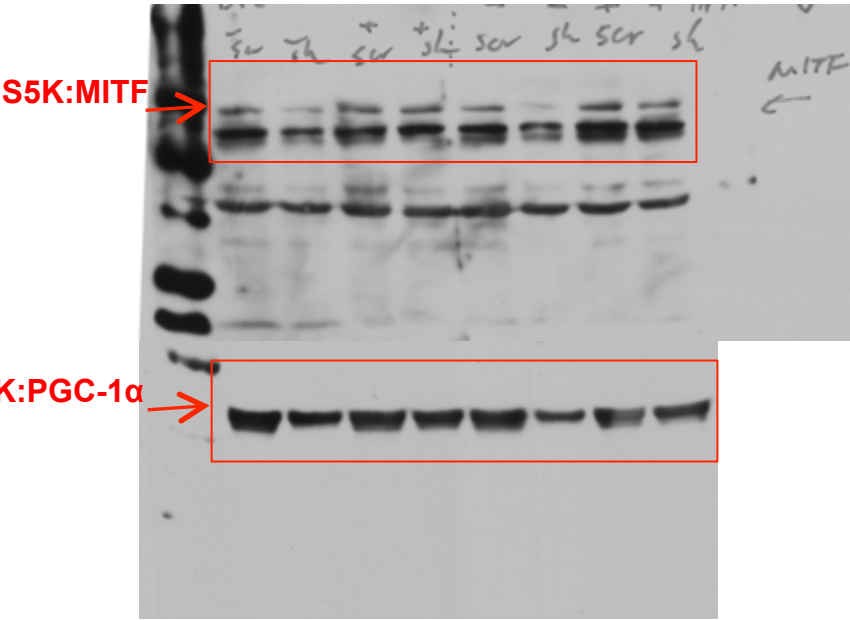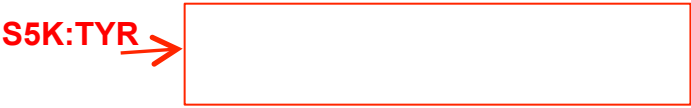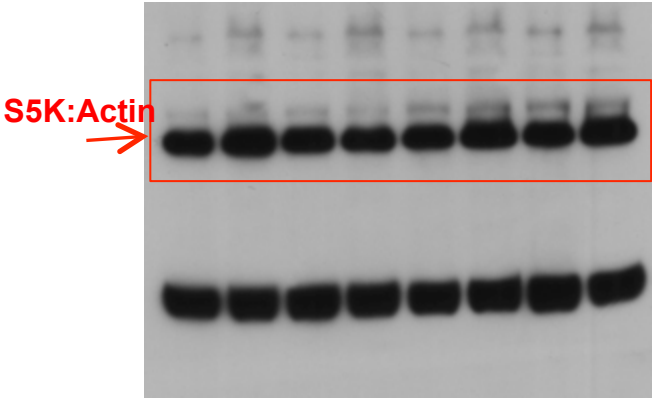

Figure S5

# Loading controls for parallel gels in figure S5K

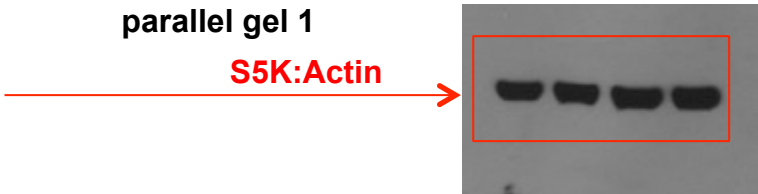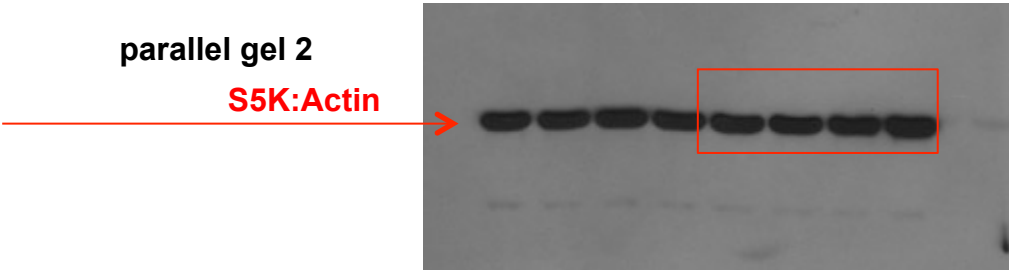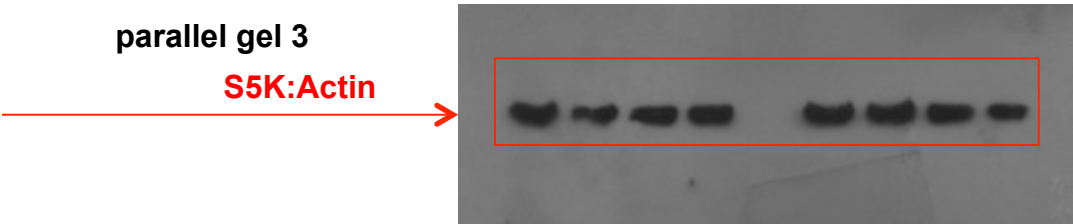

A

| A               | P16                                                                                  |      | P30 |      | P34 |      | L.A. |      | R.A. |  |
|-----------------|--------------------------------------------------------------------------------------|------|-----|------|-----|------|------|------|------|--|
|                 | N.                                                                                   | H.M. | N.  | H.M. | N.  | H.M. | H.M. | H.M. |      |  |
| TSC1            | 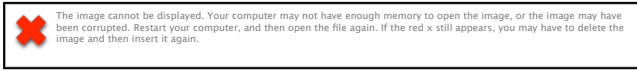   |      |     |      |     |      |      |      |      |  |
| TSC2            |    |      |     |      |     |      |      |      |      |  |
| p-S6            |    |      |     |      |     |      |      |      |      |  |
| (Ser235/236)    |    |      |     |      |     |      |      |      |      |  |
| p-S6            |    |      |     |      |     |      |      |      |      |  |
| (Ser240/244)    |    |      |     |      |     |      |      |      |      |  |
| S6              |    |      |     |      |     |      |      |      |      |  |
| p-S6K1 (Thr229) |    |      |     |      |     |      |      |      |      |  |
| p-S6K1 (Thr389) |    |      |     |      |     |      |      |      |      |  |
| S6K1            |    |      |     |      |     |      |      |      |      |  |
| p-AKT (Thr308)  |   |      |     |      |     |      |      |      |      |  |
| p-AKT (Ser473)  |  |      |     |      |     |      |      |      |      |  |
| AKT             |  |      |     |      |     |      |      |      |      |  |
| p-4E-BP1        |  |      |     |      |     |      |      |      |      |  |
| (Thr37/46)      |  |      |     |      |     |      |      |      |      |  |
| 4E-BP1          |  |      |     |      |     |      |      |      |      |  |
| PGC1-α          |  |      |     |      |     |      |      |      |      |  |
| MITF            |  |      |     |      |     |      |      |      |      |  |
| TYR             |  |      |     |      |     |      |      |      |      |  |
| p-GSK3β         |  |      |     |      |     |      |      |      |      |  |
| GSK3β           |  |      |     |      |     |      |      |      |      |  |
| p-β-catenin     |  |      |     |      |     |      |      |      |      |  |
| β-catenin       |  |      |     |      |     |      |      |      |      |  |
| Actin           |  |      |     |      |     |      |      |      |      |  |

TYR   p-GSK3β   GSK3β   p-β-catenin   β-catenin   Actin

Run on same gel, **Actin** in the figure was used as a loading control

parallel gel 1

p-S6   p-S6  
TSC1   TSC2   (Ser235/236)   (Ser240/244)   S6

Run on same gel, **S6** in the figure was used as loading control, no extra loading control needed

parallel gel 2

p-S6K1 (Thr229)   p-S6K1 (Thr389)   S6K1   p-AKT (Thr308)   p-AKT (Ser473)   AKT

Run on same gel, **AKT** in the figure was used as loading control, no extra loading control needed

parallel gel 3

p-4E-BP1  
(Thr37/46)   4E-BP1   PGC1-α   MITF

Run on same gel, **4E-BP1** in the figure was used as loading control, no extra loading control needed

Figure S6

Blots were cut for different antibody staining and exposed on the same film

Full unedited gel for Figure S6A

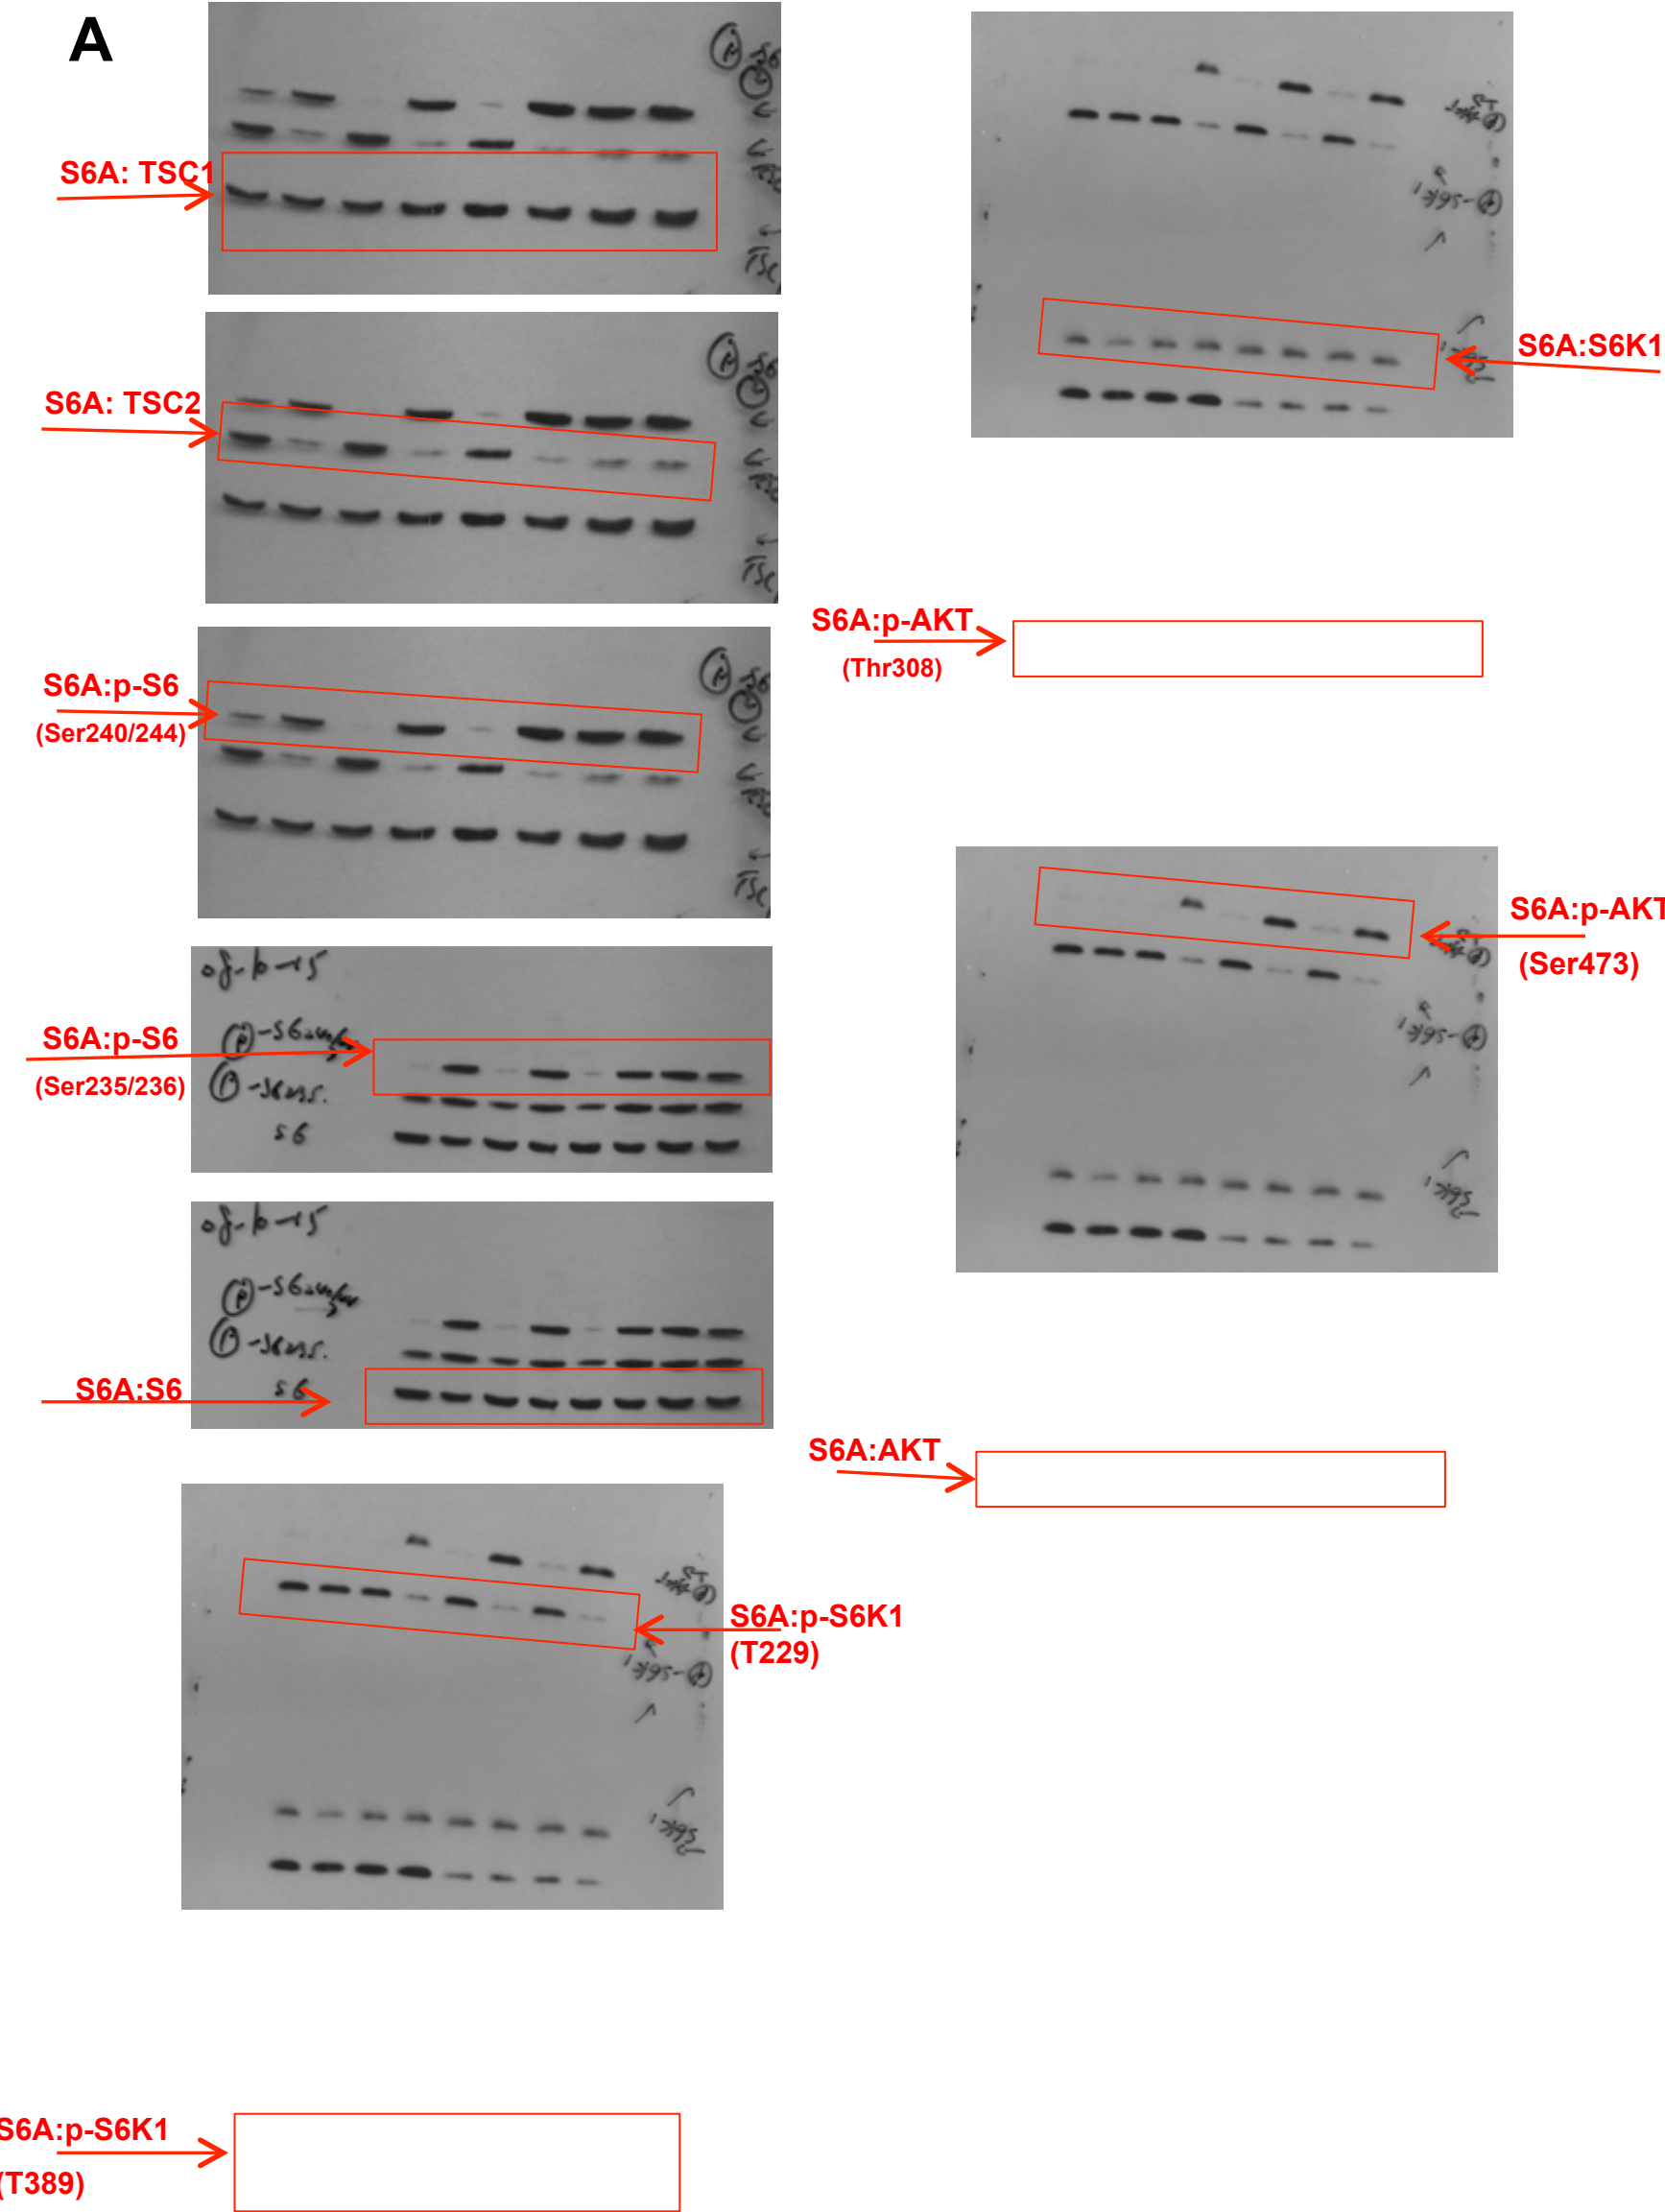

Figure S6

Blots were cut for different antibodies and exposed on the same film

Full unedited gel for Figure S6A

S6A:p-4E-BP1  
(Thr37/46)

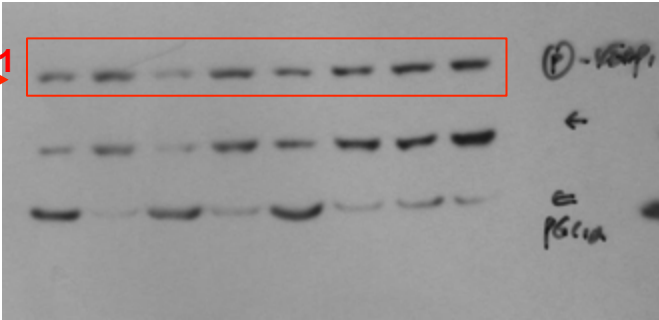

S6A:4E-BP1

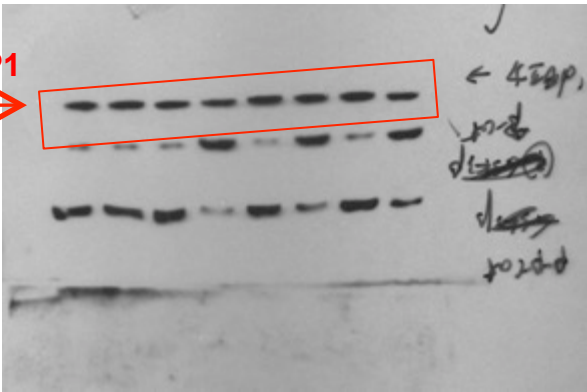

S6A:PGC1-α

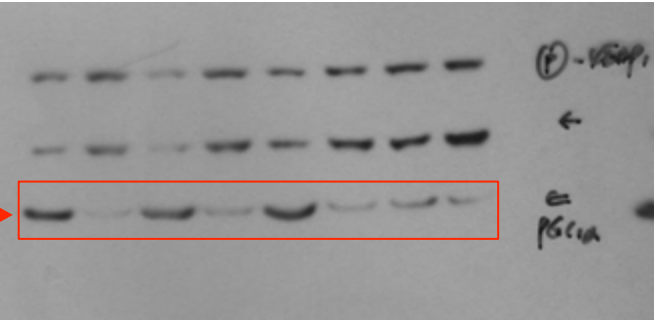

S6A:MITF

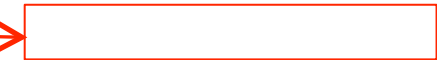

S6A:TYR

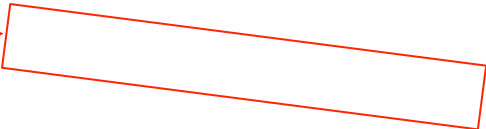

S6A:p-GSK3β

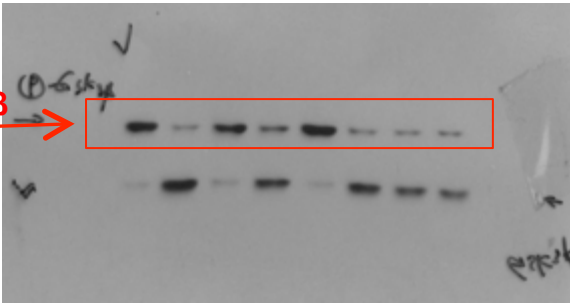

S6A:GSK3β

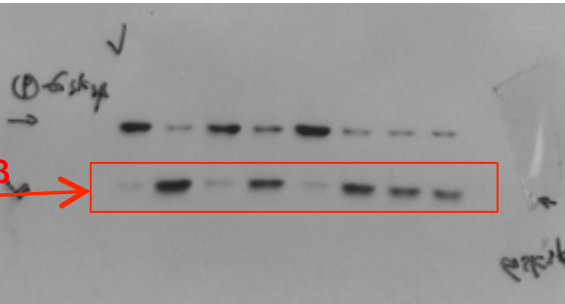

S6A:p-β-catenin

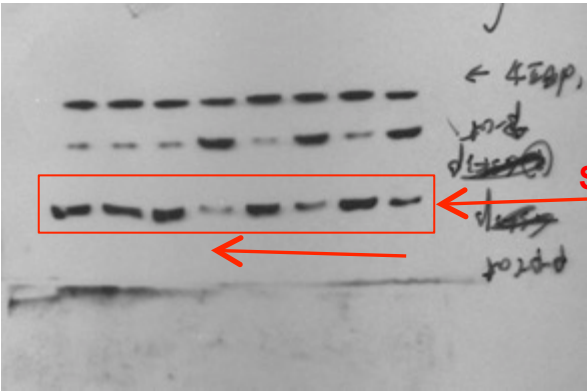

S6A:β-catenin

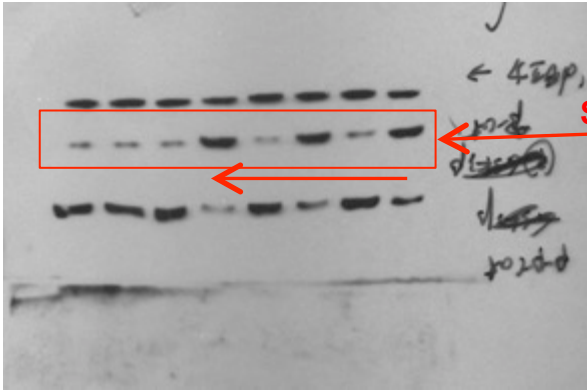

S6A:Actin

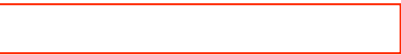

Figure S6



# Loading controls for parallel gels in figure S6A

parallel gel 1

S6A:

➤ No extra loading control needed

parallel gel 2

S6A:

➤ No extra loading control needed

parallel gel 3

S6A:

➤ No extra loading control needed
